# Supplementary material for: Gut bacteria enriched in obese mice produce leucic acid to counter obesity through HCAR2
Source: Research Square preprint supplement (doi:10.21203/rs.3.rs-8045609/v1), 2025-11-19
Supplement: Supplementary file 1 [file 5c8856749bf5f2f947badd36.xlsx]

## Sheet: Supplementary Table 1
Supplementary Table 1. OUT list of 16 S ribosome RNA gene sequencing.
Domain	Kingdom	Phylum	Class	Order	Family	Genus	Species	OTU	WT-1	WT-2	WT-3	WT-4	WT-5	WT-6	Aida-/--1	Aida-/--2	Aida-/--3	Aida-/--4	Aida-/--5	Aida-/--6
d__Bacteria	k__norank	p__Firmicutes	c__Bacilli	o__Lactobacillales	f__Streptococcaceae	g__Lactococcus	s__Lactococcus_lactis	OTU1	3255	1811	2370	953	1439	2793	1212	2289	659	1748	2011	1485
d__Bacteria	k__norank	p__Firmicutes	c__Bacilli	o__Lactobacillales	f__Streptococcaceae	g__Lactococcus	s__Lactococcus_lactis	OTU10	16	12	12	6	0	10	21	11	6	5	11	15
d__Bacteria	k__norank	p__Firmicutes	c__Clostridia	o__Lachnospirales	f__Lachnospiraceae	g__unclassified_f__Lachnospiraceae	s__unclassified_f__Lachnospiraceae	OTU100	8	40	0	0	5	0	4	6	0	7	4	0
d__Bacteria	k__norank	p__Firmicutes	c__Clostridia	o__Lachnospirales	f__Lachnospiraceae	g__norank_f__Lachnospiraceae	s__unclassified_g__norank_f__Lachnospiraceae	OTU101	40	630	14	18	6	1	161	10	1	71	36	155
d__Bacteria	k__norank	p__Firmicutes	c__Clostridia	o__Lachnospirales	f__Lachnospiraceae	g__Coprococcus	s__unclassified_g__Coprococcus	OTU102	6	1	7	4	0	2	1	5	2	4	9	4
d__Bacteria	k__norank	p__Bacteroidetes	c__Bacteroidia	o__Bacteroidales	f__Bacteroidaceae	g__norank_f__Bacteroidaceae	s__unclassified_g__norank_f__Bacteroidaceae	OTU103	5	3	0	56	9	5	0	35	65	8	2	2
d__Bacteria	k__norank	p__Firmicutes	c__Clostridia	o__Lachnospirales	f__Lachnospiraceae	g__unclassified_f__Lachnospiraceae	s__unclassified_f__Lachnospiraceae	OTU104	9	11	16	2	4	4	4	28	12	1	1	1
d__Bacteria	k__norank	p__Firmicutes	c__Clostridia	o__Lachnospirales	f__Lachnospiraceae	g__unclassified_f__Lachnospiraceae	s__unclassified_f__Lachnospiraceae	OTU105	1	15	0	0	0	1	0	1	3	8	1	9
d__Bacteria	k__norank	p__Firmicutes	c__Clostridia	o__Lachnospirales	f__Lachnospiraceae	g__Kineothrix	s__Kineothrix_alysoides	OTU106	9	15	8	4	0	3	7	6	5	13	17	7
d__Bacteria	k__norank	p__Firmicutes	c__Clostridia	o__Eubacteriales	f__Oscillospiraceae	g__Oscillibacter	s__unclassified_g__Oscillibacter	OTU107	75	362	2	146	47	9	136	4	15	627	43	199
d__Bacteria	k__norank	p__Firmicutes	c__Clostridia	o__Lachnospirales	f__Lachnospiraceae	g__norank_f__Lachnospiraceae	s__unclassified_g__norank_f__Lachnospiraceae	OTU108	1	28	0	2	0	0	0	0	0	28	2	0
d__Bacteria	k__norank	p__Firmicutes	c__Clostridia	o__Lachnospirales	f__Lachnospiraceae	g__Acetatifactor	s__unclassified_g__Acetatifactor	OTU109	0	131	138	1	26	0	0	0	0	2	5	2
d__Bacteria	k__norank	p__Bacteroidetes	c__Bacteroidia	o__Bacteroidales	f__Bacteroidaceae	g__norank_f__Bacteroidaceae	s__unclassified_g__norank_f__Bacteroidaceae	OTU11	4	0	0	0	0	0	0	0	0	0	0	0
d__Bacteria	k__norank	p__Bacteroidetes	c__Bacteroidia	o__Bacteroidales	f__Prevotellaceae	g__norank_f__Prevotellaceae	s__unclassified_g__norank_f__Prevotellaceae	OTU110	0	455	0	0	0	108	7	0	0	909	0	0
d__Bacteria	k__norank	p__Firmicutes	c__Clostridia	o__Lachnospirales	f__Lachnospiraceae	g__norank_f__Lachnospiraceae	s__unclassified_g__norank_f__Lachnospiraceae	OTU111	0	2	0	0	0	1	0	0	0	1	0	0
d__Bacteria	k__norank	p__Firmicutes	c__Clostridia	o__Eubacteriales	f__Oscillospiraceae	g__ Zongyangia	s__Zongyangia_hominis	OTU112	0	2	2	14	0	1	1	1	3	0	6	8
d__Bacteria	k__norank	p__Actinobacteria	c__Actinobacteria	o__Eggerthellales	f__Eggerthellaceae	g__norank	s__unclassified_g__norank_f__Eggerthellaceae	OTU113	0	10	0	0	1	0	0	0	0	0	1	0
d__Bacteria	k__norank	p__Firmicutes	c__Clostridia	o__Lachnospirales	f__Lachnospiraceae	g__norank	s__unclassified_g__norank_f__Lachnospiraceae	OTU114	12	22	223	31	0	2	33	1	15	3	22	29
d__Bacteria	k__norank	p__Firmicutes	c__Erysipelotrichia	o__Erysipelotrichales	f__Coprobacillaceae	g__Thomasclavelia	s__Thomasclavelia_cocleata _g__Thomasclavelia	OTU115	27	36	3	19	2	15	9	29	0	61	4	7
d__Bacteria	k__norank	p__Firmicutes	c__Clostridia	o__Eubacteriales	f__Oscillospiraceae	g__norank_f__Oscillospiraceae	s__unclassified_g__norank_f__Oscillospiraceae	OTU116	220	1260	30	164	75	133	276	205	80	683	388	226
d__Bacteria	k__norank	p__Bacteroidetes	c__Bacteroidia	o__Bacteroidales	f__Rikenellaceae	g__Alistipes	s__unclassified_g__Alistipes	OTU117	0	8	0	0	0	3	1	0	0	3	0	0
d__Bacteria	k__norank	p__Firmicutes	c__Clostridia	o__Lachnospirales	f__Lachnospiraceae	g__norank_f__Lachnospiraceae	s__unclassified_g__norank_f__Lachnospiraceae	OTU118	8	2	6	5	1	2	1	13	3	6	6	2
d__Bacteria	k__norank	p__Bacteroidetes	c__Bacteroidia	o__Bacteroidales	f__Muribaculaceae	g__norank_f__Muribaculaceae	s__unclassified_g__norank_f__Muribaculaceae	OTU119	0	14	0	0	0	10	1	0	0	82	0	0
d__Bacteria	k__norank	p__Bacteroidetes	c__Bacteroidia	o__Bacteroidales	f__Muribaculaceae	g__norank_f__Muribaculaceae	s__unclassified_g__norank_f__Muribaculaceae	OTU12	21	0	0	0	0	0	0	0	0	0	0	0
d__Bacteria	k__norank	p__Bacteroidetes	c__Bacteroidia	o__Bacteroidales	f__Tannerellaceae	g__Parabacteroides	s__Parabacteroides_distasonis	OTU120	0	94	0	173	0	51	21	0	75	184	0	82
d__Bacteria	k__norank	p__Bacteroidetes	c__Bacteroidia	o__Bacteroidales	f__Muribaculaceae	g__Muribaculum	s__ Muribaculum_intestinale	OTU121	0	2	0	0	0	24	5	0	0	29	0	0
d__Bacteria	k__norank	p__Bacteroidetes	c__Bacteroidia	o__Bacteroidales	f__Rikenellaceae	g__norank_f__Rikenellaceae	s__unclassified_g__norank_f__Rikenellaceae	OTU122	0	465	0	0	0	1001	667	0	0	561	0	0
d__Bacteria	k__norank	p__Firmicutes	c__Clostridia	o__Eubacteriales	f__Oscillospiraceae	g__Oscillibacter	s__unclassified_g__Oscillibacter	OTU123	59	142	1	6	16	7	39	3	3	62	21	27
d__Bacteria	k__norank	p__Bacteroidetes	c__Bacteroidia	o__Bacteroidales	f__Bacteroidales_S24-7_group	g__Bacteroides	s__Bacteroides_caecimuris	OTU124	0	496	0	0	0	159	162	0	0	299	0	0
d__Bacteria	k__norank	p__Bacteroidetes	c__Bacteroidia	o__Bacteroidales	f__Muribaculaceae	g__norank_f__Muribaculaceae	s__unclassified_g__norank_f__Muribaculaceae	OTU125	0	194	9	357	0	155	50	0	194	246	0	15
d__Bacteria	k__norank	p__Bacteroidetes	c__Bacteroidia	o__Bacteroidales	f__Rikenellaceae	g__Alistipes	s__unclassified_g__Alistipes	OTU126	0	13	0	0	0	5	2	0	0	3	0	0
d__Bacteria	k__norank	p__Firmicutes	c__Clostridia	o__Eubacteriales	f__Oscillospiraceae	g__Oscillibacter	s__unclassified_g__Oscillibacter	OTU127	0	9	0	1	0	0	10	0	0	17	0	1
d__Bacteria	k__norank	p__Firmicutes	c__Clostridia	o__Lachnospirales	f__Lachnospiraceae	g__Marvinbryantia	s__unclassified_g__Marvinbryantia	OTU128	2	1	2	1	0	1	0	1	0	2	2	0
d__Bacteria	k__norank	p__Actinobacteria	c__Actinobacteria	o__Eggerthellales	f__Eggerthellaceae	g__norank_f__Eggerthellaceae	s__unclassified_g__norank_f__Eggerthellaceae	OTU129	2	1	3	2	0	3	0	9	2	2	4	1
d__Bacteria	k__norank	p__Firmicutes	c__Clostridia	o__Eubacteriales	f__Clostridiaceae	g__Clostridium	s__unclassified_g__Clostridium	OTU13	388	112	1039	150	17	53	456	264	354	63	833	130
d__Bacteria	k__norank	p__Firmicutes	c__Clostridia	o__Eubacteriales	f__Oscillospiraceae	g__norank_f__Oscillospiraceae	s__unclassified_g__norank_f__Oscillospiraceae	OTU130	0	57	0	0	0	7	6	0	0	42	0	0
d__Bacteria	k__norank	p__Verrucomicrobia	c__Verrucomicrobiae	o__Verrucomicrobiales	f__Verrucomicrobiaceae	g__Akkermansia	s__Akkermansia_muciniphila	OTU131	0	0	0	0	0	0	0	0	3	0	1	0
d__Bacteria	k__norank	p__Actinobacteria	c__Actinobacteria	o__Micrococcales	f__Micrococcaceae	g__Nesterenkonia	s__unclassified_g__Nesterenkonia	OTU132	0	0	0	0	0	0	0	0	0	0	0	0
d__Bacteria	k__norank	p__Firmicutes	c__Clostridia	o__Lachnospirales	f__Lachnospiraceae	g__norank_f__Lachnospiraceae	s__unclassified_g__norank_f__Lachnospiraceae	OTU133	6	0	0	0	0	0	0	9	0	0	1	0
d__Bacteria	k__norank	p__Proteobacteria	c__Gammaproteobacteria	o__Pseudomonadales	f__Moraxellaceae	g__Acinetobacter	s__Acinetobacter_nosocomialis	OTU134	1	0	0	0	0	0	0	0	0	0	0	0
d__Bacteria	k__norank	p__Firmicutes	c__Bacilli	o__Lactobacillales	f__Carnobacteriaceae	g__Granulicatella	s__Granulicatella_adiacens	OTU135	0	0	0	0	0	0	0	0	0	0	0	0
d__Bacteria	k__norank	p__Firmicutes	c__Clostridia	o__Eubacteriales	f__Oscillospiraceae	g__norank_f__Oscillospiraceae	s__unclassified_g__norank_f__Oscillospiraceae	OTU136	0	0	28	10	0	0	0	0	0	0	0	14
d__Bacteria	k__norank	p__Firmicutes	c__Clostridia	o__Eubacteriales	f__Eubacteriaceae	g__Eubacterium	s__unclassified_g__Eubacterium	OTU137	0	0	4	5	0	0	0	0	0	0	0	0
d__Bacteria	k__norank	p__Firmicutes	c__Clostridia	o__Lachnospirales	f__Lachnospiraceae	g__Roseburia	s__unclassified_g__Roseburia	OTU138	0	0	35	2	0	0	0	0	0	0	0	5
d__Bacteria	k__norank	p__Firmicutes	c__Clostridia	o__Christensenellales	f__Christensenellaceae	g__norank_f__Christensenellaceae	s__unclassified_g__norank_f__Christensenellaceae	OTU139	5	4	39	12	2	5	0	0	2	47	0	1
d__Bacteria	k__norank	p__Firmicutes	c__Clostridia	o__Eubacteriales	f__Ruminococcaceae	g__norank_f__Ruminococcaceae	s__unclassified_g__norank_f__Ruminococcaceae	OTU14	92	0	6	20	0	0	0	0	0	0	12	3
d__Bacteria	k__norank	p__Firmicutes	c__Clostridia	o__Lachnospirales	f__Lachnospiraceae	g__Lacrimispora	s__Lacrimispora_sphenoides	OTU140	217	237	1932	488	35	89	315	184	171	248	364	514
d__Bacteria	k__norank	p__Firmicutes	c__Clostridia	o__Eubacteriales	f__Oscillospiraceae	g__Ruminiclostridium	s__unclassified_g__Ruminiclostridium	OTU141	0	63	57	15	32	49	0	0	7	5	2	7
d__Bacteria	k__norank	p__Firmicutes	c__Clostridia	o__Lachnospirales	f__Lachnospiraceae	g__Fusimonas	s__unclassified_g__Fusimonas	OTU142	0	1	3	1	0	0	1	0	1	2	0	1
d__Bacteria	k__norank	p__Firmicutes	c__Clostridia	o__Lachnospirales	f__Lachnospiraceae	g__norank_f__Lachnospiraceae	s__unclassified_g__norank_f__Lachnospiraceae	OTU143	1	0	11	3	0	0	0	0	0	0	1	1
d__Bacteria	k__norank	p__unclassified_k__norank	c__unclassified_k__norank	o__unclassified_k__norank	f__unclassified_k__norank	g__unclassified_k__norank	s__unclassified_k__norank	OTU144	77	50	1772	535	9	43	39	95	988	205	405	232
d__Bacteria	k__norank	p__Firmicutes	c__Clostridia	o__Lachnospirales	f__Lachnospiraceae	g__norank_f__Lachnospiraceae	s__unclassified_g__norank_f__Lachnospiraceae	OTU145	3	0	43	4	0	0	0	0	11	2	2	0
d__Bacteria	k__norank	p__Firmicutes	c__Clostridia	o__Lachnospirales	f__Lachnospiraceae	g__norank_f__Lachnospiraceae	s__unclassified_g__norank_f__Lachnospiraceae	OTU146	499	0	6075	4103	39	327	6	249	426	12	506	285
d__Bacteria	k__norank	p__Firmicutes	c__Clostridia	o__Lachnospirales	f__Lachnospiraceae	g__Murimonas	s__unclassified_g__Murimonas	OTU147	0	0	1	2	0	0	0	0	1	0	0	0
d__Bacteria	k__norank	p__Firmicutes	c__Clostridia	o__Eubacteriales	f__Oscillospiraceae	g__norank_f__Oscillospiraceae	s__unclassified_g__norank_f__Oscillospiraceae	OTU148	14	6	0	28	8	11	11	25	14	22	63	15
d__Bacteria	k__norank	p__Firmicutes	c__Clostridia	o__Lachnospirales	f__Lachnospiraceae	g__Anaerotignum	s__unclassified_g__Anaerotignum	OTU149	29	501	4	168	79	34	138	8	48	379	6	127
d__Bacteria	k__norank	p__Firmicutes	c__Clostridia	o__Lachnospirales	f__Lachnospiraceae	g__norank_f__Lachnospiraceae	s__unclassified_g__norank_f__Lachnospiraceae	OTU15	37	35	81	2	8	1	8	59	27	46	130	23
d__Bacteria	k__norank	p__Firmicutes	c__Clostridia	o__Lachnospirales	f__Lachnospiraceae	g__Kineothrix	s__unclassified_g__Kineothrix	OTU150	0	0	119	84	0	0	0	0	7	0	0	0
d__Bacteria	k__norank	p__Firmicutes	c__Erysipelotrichia	o__Erysipelotrichales	f__Erysipelotrichaceae	g__norank_f__Erysipelotrichaceae	s__unclassified_g__norank_f__Erysipelotrichaceae	OTU151	0	0	0	5	0	0	0	0	0	0	0	0
d__Bacteria	k__norank	p__Firmicutes	c__Clostridia	o__Eubacteriales	f__Butyricicoccaceae	g__Butyricicoccus	s__unclassified_g__Butyricicoccus	OTU152	42	16	11	11	3	6	8	19	6	16	52	6
d__Bacteria	k__norank	p__Firmicutes	c__Erysipelotrichia	o__Erysipelotrichales	f__Erysipelotrichaceae	g__Turicibacter	s__unclassified_g__Turicibacter	OTU153	1	0	0	0	0	0	0	2	0	0	1	1
d__Bacteria	k__norank	p__unclassified_k__norank	c__unclassified_k__norank	o__unclassified_k__norank	f__unclassified_k__norank	g__unclassified_k__norank	s__unclassified_k__norank	OTU154	0	0	0	0	0	0	0	0	0	0	0	0
d__Bacteria	k__norank	p__Firmicutes	c__Bacilli	o__Bacillales	f__Staphylococcaceae	g__Mammaliicoccus	s__unclassified_g__Mammaliicoccus	OTU155	0	0	1	0	0	0	0	1	1	0	1	1
d__Bacteria	k__norank	p__Firmicutes	c__Clostridia	o__Lachnospirales	f__Lachnospiraceae	g__norank_f__Lachnospiraceae	s__unclassified_g__norank_f__Lachnospiraceae	OTU156	0	0	4	0	26	0	0	2	0	0	91	1
d__Bacteria	k__norank	p__Firmicutes	c__Clostridia	o__Lachnospirales	f__Lachnospiraceae	g__norank_f__Lachnospiraceae	s__unclassified_g__norank_f__Lachnospiraceae	OTU157	14	0	0	0	4	0	0	3	0	0	1	0
d__Bacteria	k__norank	p__Firmicutes	c__Clostridia	o__Lachnospirales	f__Lachnospiraceae	g__norank_f__Lachnospiraceae	s__unclassified_g__norank_f__Lachnospiraceae	OTU158	27	3	0	0	1	0	1	9	0	4	43	0
d__Bacteria	k__norank	p__Bacteroidetes	c__Bacteroidia	o__Bacteroidales	f__Muribaculaceae	g__Muribaculum	s__unclassified_g__Muribaculum	OTU159	6	0	0	1	5	0	0	4	0	0	13	0
d__Bacteria	k__norank	p__Firmicutes	c__Clostridia	o__Lachnospirales	f__Lachnospiraceae	g__norank_f__Lachnospiraceae	s__unclassified_g__norank_f__Lachnospiraceae	OTU16	2	0	0	0	0	0	0	0	0	0	0	0
d__Bacteria	k__norank	p__Bacteroidetes	c__Bacteroidia	o__Bacteroidales	f__Muribaculaceae	g__Duncaniella	s__Duncaniella_freteri	OTU160	237	70	1	442	73	44	44	624	1020	122	352	143
d__Bacteria	k__norank	p__Bacteroidetes	c__Bacteroidia	o__Bacteroidales	f__Bacteroidaceae	g__Bacteroides	s__unclassified_g__Bacteroides	OTU161	0	0	0	0	3	0	0	0	0	0	5	0
d__Bacteria	k__norank	p__Firmicutes	c__Clostridia	o__Eubacteriales	f__Oscillospiraceae	g__Anaerotruncus	s__unclassified_g__Anaerotruncus	OTU162	0	0	0	0	0	3	0	0	0	0	0	0
d__Bacteria	k__norank	p__Firmicutes	c__Clostridia	o__Lachnospirales	f__Lachnospiraceae	g__Kineothrix	s__uncultured_bacterium_g__Kineothrix	OTU163	3	3	18	1	0	2	16	5	7	7	14	3
d__Bacteria	k__norank	p__Actinobacteria	c__Actinobacteria	o__Coriobacteriales	f__Coriobacteriaceae	g__Parvibacter	s__Parvibacter_caecicola	OTU164	15	0	0	0	20	0	0	0	0	1	6	0
d__Bacteria	k__norank	p__Firmicutes	c__Clostridia	o__Coriobacteriales	f__Coriobacteriaceae	g__Parvibacter	s__unclassified_g__Parvibacter	OTU165	0	0	0	10	0	8	0	0	0	0	12	1
d__Bacteria	k__norank	p__Firmicutes	c__Clostridia	o__Lachnospirales	f__Lachnospiraceae	g__Anaerotruncus	s__unclassified_g__Anaerotruncus	OTU166	454	28	0	159	31	13	20	108	2	46	440	16
d__Bacteria	k__norank	p__Firmicutes	c__Clostridia	o__Lachnospirales	f__Lachnospiraceae	g__Anaerotruncus	s__unclassified_g__Anaerotruncus	OTU167	3	1	0	3	0	0	0	0	0	0	13	0
d__Bacteria	k__norank	p__Bacteroidetes	c__Bacteroidia	o__Bacteroidales	f__Muribaculaceae	g__norank_f__Muribaculaceae	s__unclassified_g__norank_f__Muribaculaceae	OTU168	14	5	0	0	3	11	6	35	0	9	24	0
d__Bacteria	k__norank	p__Firmicutes	c__Bacilli	o__Lactobacillales	f__Lactobacillaceae	g__Lactobacillus	s__Limosilactobacillus_albertensis	OTU169	658	0	2632	671	1215	159	67	94	879	254	240	1659
d__Bacteria	k__norank	p__Firmicutes	c__Clostridia	o__Lachnospirales	f__Lachnospiraceae	g__Eubacterium	s__unclassified_g__Eubacterium	OTU17	255	0	110	2	103	0	0	222	0	0	30	0
d__Bacteria	k__norank	p__Firmicutes	c__Clostridia	o__Lachnospirales	f__Lachnospiraceae	g__norank_f__Lachnospiraceae	s__unclassified_g__norank_f__Lachnospiraceae	OTU170	0	93	62	0	0	1	72	14	2	13	67	21
d__Bacteria	k__norank	p__Firmicutes	c__Clostridia	o__Lachnospirales	f__Lachnospiraceae	g__norank_f__Lachnospiraceae	s__unclassified_g__norank_f__Lachnospiraceae	OTU171	2	5	2	2	0	4	5	3	5	4	20	3
d__Bacteria	k__norank	p__Proteobacteria	c__Deltaproteobacteria	o__Desulfovibrionales	f__Desulfovibrionaceae	g__Desulfovibrio	s__Desulfovibrio_porci	OTU172	1001	0	682	94	83	0	0	508	177	0	1101	226
d__Bacteria	k__norank	p__Firmicutes	c__Clostridia	o__Lachnospirales	f__Lachnospiraceae	g__Anaeromicropila	s__unclassified_g__Anaeromicropila	OTU173	6	0	0	0	1	0	0	8	0	0	8	0
d__Bacteria	k__norank	p__Proteobacteria	c__Deltaproteobacteria	o__Desulfovibrionales	f__Desulfovibrionaceae	g__Desulfovibrio	s__Desulfovibrio_porci	OTU174	9	95	207	0	4	61	424	6	1	124	13	0
d__Bacteria	k__norank	p__Firmicutes	c__Clostridia	o__Lachnospirales	f__Lachnospiraceae	g__norank_f__Lachnospiraceae	s__unclassified_g__norank_f__Lachnospiraceae	OTU175	159	181	0	0	4	8	40	66	1	42	81	0
d__Bacteria	k__norank	p__Firmicutes	c__Clostridia	o__Lachnospirales	f__Lachnospiraceae	g__norank_f__Lachnospiraceae	s__unclassified_f__Lachnospiraceae	OTU176	194	0	0	0	5	0	0	18	0	0	60	0
d__Bacteria	k__norank	p__Deferribacteres	c__Deferribacteres	o__Deferribacterales	f__Deferribacteraceae	g__Mucispirillum	s__Mucispirillum_schaedleri	OTU177	6	16	15	74	1	28	2322	10	3	12	114	320
d__Bacteria	k__norank	p__Firmicutes	c__Bacilli	o__Lactobacillales	f__Streptococcaceae	g__Streptococcus	s__Streptococcus_danieliae	OTU178	210	63	68	40	26	70	33	115	23	53	64	16
d__Bacteria	k__norank	p__Bacteroidetes	c__Bacteroidia	o__Eubacteriales	f__Odoribacteraceae	g__norank_f__Odoribacteraceae	s__unclassified_g__norank_f__Odoribacteraceae	OTU179	1079	0	0	0	207	0	0	1584	0	0	1193	0
d__Bacteria	k__norank	p__Firmicutes	c__Clostridia	o__Eubacteriales	f__Clostridiaceae	g__norank_f__Clostridiaceae	s__unclassified_g__norank_f__Clostridiaceae	OTU18	1	2	0	1	0	0	1	0	0	0	1	0
d__Bacteria	k__norank	p__Proteobacteria	c__Deltaproteobacteria	o__Desulfovibrionales	f__Desulfovibrionaceae	g__norank_f__Desulfovibrionaceae	s__unclassified_g__norank_f__Desulfovibrionaceae	OTU180	660	46	98	66	36	45	65	260	53	15	1325	127
d__Bacteria	k__norank	p__Firmicutes	c__Clostridia	o__Eubacteriales	f__Oscillospiraceae	g__Neglectibacter	s__unclassified_g__Neglectibacter	OTU181	22	3	8	12	4	0	8	8	1	4	4	5
d__Bacteria	k__norank	p__Firmicutes	c__Clostridia	o__Eubacteriales	f__Clostridiaceae	g__norank_f__Clostridiaceae	s__unclassified_g__norank_f__Clostridiaceae	OTU182	199	17	823	43	22	40	95	99	61	11	197	47
d__Bacteria	k__norank	p__Firmicutes	c__Clostridia	o__Lachnospirales	f__Lachnospiraceae	g__norank_f__Lachnospiraceae	s__unclassified_g__norank_f__Lachnospiraceae	OTU183	0	0	0	0	3	0	8	0	0	8	10	1
d__Bacteria	k__norank	p__Bacteroidetes	c__Bacteroidia	o__Bacteroidales	f__Muribaculaceae	g__norank_f__Muribaculaceae	s__unclassified_g__norank_f__Muribaculaceae	OTU184	565	0	0	0	295	0	0	441	0	0	266	0
d__Bacteria	k__norank	p__Actinobacteria	c__Actinobacteria	o__Corynebacteriales	f__Corynebacteriaceae	g__Corynebacterium	s__Corynebacterium_stationis	OTU185	0	0	0	0	0	0	0	0	0	0	0	0
d__Bacteria	k__norank	p__Firmicutes	c__Clostridia	o__Clostridiales	f__Family_XIII	g__[Eubacterium]_nodatum_group	s__unclassified_g__[Eubacterium]_nodatum_group	OTU186	17	0	0	0	4	0	0	32	0	0	2	0
d__Bacteria	k__norank	p__Firmicutes	c__Bacilli	o__Lactobacillales	f__Lactobacillaceae	g__Lactobacillus	s__unclassified_g__Lactobacillus	OTU187	12	0	15	6	27	39	6	0	32	2	8	26
d__Bacteria	k__norank	p__Firmicutes	c__Bacilli	o__Lactobacillales	f__Lactobacillaceae	g__norank_f__Lactobacillaceae	s__unclassified_g__norank_f__Lactobacillaceae	OTU188	0	0	0	0	51	22	2	0	0	1	2	0
d__Bacteria	k__norank	p__Firmicutes	c__Erysipelotrichia	o__Erysipelotrichales	f__Erysipelotrichaceae	g__Faecalibaculum	s__Faecalibaculum_rodentium	OTU189	8	0	0	0	42	26	0	0	0	7	1	0
d__Bacteria	k__norank	p__Bacteroidetes	c__Bacteroidia	o__Bacteroidales	f__Bacteroidaceae	g__norank_f__Bacteroidaceae	s__unclassified_g__norank_f__Bacteroidaceae	OTU19	2	0	0	0	0	0	0	0	0	0	0	0
d__Bacteria	k__norank	p__Proteobacteria	c__Gammaproteobacteria	o__Enterobacteriales	f__Enterobacteriaceae	g__Escherichia-Shigella	s__unclassified_g__Escherichia-Shigella	OTU190	4	0	0	0	0	0	0	0	0	0	1	0
d__Bacteria	k__norank	p__Fusobacteria	c__Fusobacteriia	o__Fusobacteriales	f__Fusobacteriaceae	g__Psychrilyobacter	s__unclassified_g__Psychrilyobacter	OTU191	1	0	0	0	0	1	0	1	0	0	0	0
d__Bacteria	k__norank	p__unclassified_k__norank	c__unclassified_k__norank	o__unclassified_k__norank	f__unclassified_k__norank	g__unclassified_k__norank	s__unclassified_k__norank	OTU192	0	0	0	0	0	0	0	0	0	0	0	0
d__Bacteria	k__norank	p__Firmicutes	c__Clostridia	o__Lachnospirales	f__Lachnospiraceae	g__Muricomes	s__Muricomes_intestini	OTU193	3	45	1	6	6	10	14	13	12	16	3	11
d__Bacteria	k__norank	p__Firmicutes	c__Bacilli	o__Lactobacillales	f__Lactobacillaceae	g__Lactobacillus	s__unclassified_g__Lactobacillus	OTU194	37	0	193	50	150	10	2	1	145	5	13	206
d__Bacteria	k__norank	p__Firmicutes	c__Clostridia	o__Lachnospirales	f__Lachnospiraceae	g__norank_f__Lachnospiraceae	s__Clostridium_porci	OTU195	195	139	520	65	15	66	146	185	122	206	178	256
d__Bacteria	k__norank	p__Firmicutes	c__Clostridia	o__Eubacteriales	f__Oscillospiraceae	g__norank_f__Oscillospiraceae	s__unclassified_g__norank_f__Oscillospiraceae	OTU196	30	30	13	28	3	37	25	22	18	32	106	55
d__Bacteria	k__norank	p__Firmicutes	c__Clostridia	o__Eubacteriales	f__Clostridiaceae	g__norank_f__Clostridiaceae	s__unclassified_g__norank_f__Clostridiaceae	OTU197	418	431	0	79	3	18	209	3	0	41	2	230
d__Bacteria	k__norank	p__Firmicutes	c__Clostridia	o__Clostridiales	f__Family_XIII	g__[Eubacterium]_brachy_group	s__uncultured_bacterium_g__[Eubacterium]_brachy_group	OTU198	0	1	1	3	1	0	3	0	0	12	0	6
d__Bacteria	k__norank	p__Firmicutes	c__Clostridia	o__Lachnospirales	f__Lachnospiraceae	g__norank_f__Lachnospiraceae	s__unclassified_g__norank_f__Lachnospiraceae	OTU199	10	37	252	11	3	3	12	3	6	28	22	31
d__Bacteria	k__norank	p__Bacteroidetes	c__Bacteroidia	o__Bacteroidales	f__Muribaculaceae	g__norank_f__Muribaculaceae	s__unclassified_g__norank_f__Muribaculaceae	OTU2	43	89	1	0	28	25	13	20	0	26	87	0
d__Bacteria	k__norank	p__Firmicutes	c__Clostridia	o__Lachnospirales	f__Lachnospiraceae	g__Qiania	s__Qiania_dongpingensis	OTU20	7	37	6	2	5	0	7	0	0	14	11	1
d__Bacteria	k__norank	p__Firmicutes	c__Clostridia	o__Lachnospirales	f__Lachnospiraceae	g__norank_f__Lachnospiraceae	s__unclassified_g__norank_f__Lachnospiraceae	OTU200	26	58	1	41	20	1	57	23	58	22	39	122
d__Bacteria	k__norank	p__Firmicutes	c__Clostridia	o__Lachnospirales	f__Lachnospiraceae	g__norank_f__Lachnospiraceae	s__unclassified_g__norank_f__Lachnospiraceae	OTU201	0	1	257	22	0	0	1	0	38	0	0	110
d__Bacteria	k__norank	p__Firmicutes	c__Clostridia	o__Lachnospirales	f__Lachnospiraceae	g__Sporofaciens	s__Sporofaciens_musculi	OTU202	88	35	194	192	52	16	466	56	38	217	211	113
d__Bacteria	k__norank	p__Firmicutes	c__Clostridia	o__Lachnospirales	f__Lachnospiraceae	g__Enterocloster	s__Sporofaciens_musculi	OTU203	143	376	1086	32	251	42	110	83	248	569	603	645
d__Bacteria	k__norank	p__Firmicutes	c__Clostridia	o__Lachnospirales	f__Lachnospiraceae	g__norank_f__Lachnospiraceae	s__unclassified_g__norank_f__Lachnospiraceae	OTU204	316	192	32	86	58	70	33	259	2	202	8	44
d__Bacteria	k__norank	p__Firmicutes	c__Clostridia	o__Eubacteriales	f__Oscillospiraceae	g__Oscillibacter	s__unclassified_g__Oscillibacter	OTU205	16	1152	74	30	12	181	15	0	66	155	3	88
d__Bacteria	k__norank	p__Firmicutes	c__Clostridia	o__Lachnospirales	f__Lachnospiraceae	g__norank_f__Lachnospiraceae	s__unclassified_g__norank_f__Lachnospiraceae	OTU206	2	15	0	0	0	1	9	0	1	7	2	22
d__Bacteria	k__norank	p__Firmicutes	c__Clostridia	o__Lachnospirales	f__Lachnospiraceae	g__norank_f__Lachnospiraceae	s__unclassified_g__norank_f__Lachnospiraceae	OTU207	15	0	19	7	32	18	5	0	25	0	6	37
d__Bacteria	k__norank	p__Firmicutes	c__Clostridia	o__Lachnospirales	f__Lachnospiraceae	g__Anaerotaenia	s__unclassified_g__Anaerotaenia	OTU208	388	1015	472	129	386	130	474	292	204	502	455	235
d__Bacteria	k__norank	p__Firmicutes	c__Clostridia	o__Lachnospirales	f__Lachnospiraceae	g__norank_f__Lachnospiraceae	s__unclassified_g__norank_f__Lachnospiraceae	OTU209	375	1454	45	128	242	177	3244	2736	1023	690	4275	2898
d__Bacteria	k__norank	p__Firmicutes	c__Erysipelotrichia	o__Erysipelotrichales	f__Erysipelotrichaceae	g__Holdemania	s__Holdemania_massiliensis	OTU21	3	0	7	3	1	1	0	0	0	1	0	0
d__Bacteria	k__norank	p__Firmicutes	c__Clostridia	o__Lachnospirales	f__Lachnospiraceae	g__norank_f__Lachnospiraceae	s__unclassified_g__norank_f__Lachnospiraceae	OTU210	31	193	7	12	10	3	56	1	2	72	15	59
d__Bacteria	k__norank	p__Firmicutes	c__Clostridia	o__Lachnospirales	f__Lachnospiraceae	g_Schaedlerella	s__Schaedlerella_arabinosiphila	OTU211	52	255	26	1	13	45	50	28	12	76	184	62
d__Bacteria	k__norank	p__Firmicutes	c__Clostridia	o__Eubacteriales	f__Clostridiaceae	g__norank_f__Clostridiaceae	s__unclassified_g__norank_f__Clostridiaceae	OTU212	1	1	126	34	0	0	1	0	113	2	0	53
d__Bacteria	k__norank	p__Proteobacteria	c__Epsilonproteobacteria	o__Campylobacterales	f__Helicobacteraceae	g__Helicobacter	s__Helicobacter_mastomyrinus	OTU213	0	1	5	43	26	10	21	6	37	89	12	47
d__Bacteria	k__norank	p__Firmicutes	c__Clostridia	o__Eubacteriales	f__Clostridiaceae	g__norank_f__Clostridiaceae	s__unclassified_g__norank_f__Clostridiaceae	OTU214	0	2	20	1	0	13	0	1	2	2	1	11
d__Bacteria	k__norank	p__Firmicutes	c__Clostridia	o__Lachnospirales	f__Lachnospiraceae	g__Anaerotaenia	s__Anaerotaenia_torta	OTU215	2	5	8	19	0	11	9	29	22	17	47	5
d__Bacteria	k__norank	p__Firmicutes	c__Clostridia	o__Lachnospirales	f__Lachnospiraceae	g__Enterocloster	s__Enterocloster_hominis	OTU216	4	16	8	6	1	0	3	4	7	5	8	5
d__Bacteria	k__norank	p__Firmicutes	c__Clostridia	o__Eubacteriales	f__Oscillospiraceae	g__Angelakisella	s__Angelakisella_massiliensis	OTU217	161	294	7	246	22	66	158	55	39	101	491	74
d__Bacteria	k__norank	p__Firmicutes	c__Clostridia	o__Eubacteriales	f__Oscillospiraceae	g__Vescimonas	s__unclassified_g__Vescimonas	OTU218	115	1035	0	105	45	99	549	6	57	496	14	465
d__Bacteria	k__norank	p__Firmicutes	c__Clostridia	o__Lachnospirales	f__Lachnospiraceae	g__Coprococcus	s__unclassified_g__Coprococcus	OTU219	0	85	28	47	0	31	9	1	9	32	0	22
d__Bacteria	k__norank	p__Firmicutes	c__Clostridia	o__Lachnospirales	f__Lachnospiraceae	g__norank_f__Lachnospiraceae	s__unclassified_g__norank_f__Lachnospiraceae	OTU22	120	162	2	1	0	62	324	70	0	94	170	0
d__Bacteria	k__norank	p__Firmicutes	c__Clostridia	o__Lachnospirales	f__Lachnospiraceae	g__norank_f__Lachnospiraceae	s__unclassified_g__norank_f__Lachnospiraceae	OTU220	447	691	177	27	92	107	518	618	114	669	473	139
d__Bacteria	k__norank	p__Firmicutes	c__Clostridia	o__Lachnospirales	f__Lachnospiraceae	g__norank_f__Lachnospiraceae	s__unclassified_g__norank_f__Lachnospiraceae	OTU221	7	15	0	3	0	1	3	0	0	0	0	14
d__Bacteria	k__norank	p__Firmicutes	c__Clostridia	o__Lachnospirales	f__Lachnospiraceae	g__norank_f__Lachnospiraceae	s__unclassified_g__norank_f__Lachnospiraceae	OTU222	39	159	224	102	7	38	128	22	0	137	171	58
d__Bacteria	k__norank	p__Firmicutes	c__Clostridia	o__Lachnospirales	f__Lachnospiraceae	g__Sporofaciens	s__Sporofaciens_musculi	OTU223	362	473	69	83	59	92	159	70	31	145	104	96
d__Bacteria	k__norank	p__Firmicutes	c__Clostridia	o__Lachnospirales	f__Lachnospiraceae	g__norank_f__Lachnospiraceae	s__unclassified_g__norank_f__Lachnospiraceae	OTU224	11	62	60	34	3	23	19	20	17	9	41	16
d__Bacteria	k__norank	p__Firmicutes	c__Bacilli	o__Lactobacillales	f__Lactobacillaceae	g__Lactobacillus	s__Lactobacillus_johnsonii	OTU225	22	0	41	14	21	13	6	1	24	3	14	38
d__Bacteria	k__norank	p__Firmicutes	c__Clostridia	o__Lachnospirales	f__Lachnospiraceae	g__norank_f__Lachnospiraceae	s__unclassified_g__norank_f__Lachnospiraceae	OTU226	741	55	533	194	47	73	287	36	58	61	684	207
d__Bacteria	k__norank	p__Firmicutes	c__Clostridia	o__Eubacteriales	f__Oscillospiraceae	g__Anaerotruncus	s__unclassified_g__Anaerotruncus	OTU227	8	24	0	34	2	33	33	14	18	38	53	29
d__Bacteria	k__norank	p__Firmicutes	c__Clostridia	o__Eubacteriales	f__Clostridiaceae	g__Clostridium	s__unclassified_g__Clostridium	OTU228	16	27	31	0	0	16	17	66	108	42	27	53
d__Bacteria	k__norank	p__Firmicutes	c__Clostridia	o__Lachnospirales	f__Lachnospiraceae	g__Kineothrix	s__unclassified_bacterium_A4_g__Kineothrix	OTU229	0	0	2	5	0	0	0	1	2	0	5	68
d__Bacteria	k__norank	p__Bacteroidetes	c__Bacteroidia	o__Bacteroidales	f__Bacteroidaceae	g__Bacteroides	s__Bacteroides_muris	OTU23	3771	103	0	455	1215	73	20	5620	1065	246	1793	158
d__Bacteria	k__norank	p__Proteobacteria	c__Deltaproteobacteria	o__Desulfovibrionales	f__Desulfovibrionaceae	g__Taurinivorans	s__uncultured_bacterium_g__Taurinivorans	OTU230	0	0	9	13	0	0	0	0	32	0	0	34
d__Bacteria	k__norank	p__Firmicutes	c__Clostridia	o__Lachnospirales	f__Lachnospiraceae	g__norank_f__Lachnospiraceae	s__unclassified_g__norank_f__Lachnospiraceae	OTU231	2	14	0	0	1	3	0	0	1	4	0	83
d__Bacteria	k__norank	p__Firmicutes	c__Clostridia	o__Lachnospirales	f__Lachnospiraceae	g__Lachnospiraceae_NK4A136_group	s__unclassified_g__norank_f__Lachnospiraceae	OTU232	7	1158	1529	526	177	90	327	58	79	32	302	131
d__Bacteria	k__norank	p__Firmicutes	c__Clostridia	o__Eubacteriales	f__Clostridiaceae	g__Clostridium	s__unclassified_g__Clostridium	OTU233	3	34	0	0	1	0	6	0	0	22	4	7
d__Bacteria	k__norank	p__Firmicutes	c__Bacilli	o__Lactobacillales	f__Streptococcaceae	g__Lactococcus	s__Lactococcus_lactis	OTU234	14	11	7	2	4	35	0	2	4	5	3	4
d__Bacteria	k__norank	p__Actinobacteria	c__Actinobacteria	o__Eggerthellales	f__Eggerthellaceae	g__norank_f__Eggerthellaceae	s__unclassified_g__norank_f__Eggerthellaceae	OTU235	1	0	1	2	1	1	0	1	0	2	1	0
d__Bacteria	k__norank	p__Actinobacteria	c__Actinobacteria	o__Bifidobacteriales	f__Bifidobacteriaceae	g__Bifidobacterium	s__Bifidobacterium_pseudolongum	OTU236	0	0	0	1	0	1	0	0	0	0	0	0
d__Bacteria	k__norank	p__Firmicutes	c__Clostridia	o__Eubacteriales	f__Butyricicoccaceae	g__Butyricicoccus	s__unclassified_g__Butyricicoccus	OTU237	3	1	0	1	0	0	2	1	3	0	0	0
d__Bacteria	k__norank	p__Bacteroidetes	c__Bacteroidia	o__Bacteroidales	f__Rikenellaceae	g__Alistipes	s__Alistipes_putredinis	OTU238	0	0	0	0	0	0	0	0	0	0	0	0
d__Bacteria	k__norank	p__Firmicutes	c__Clostridia	o__Lachnospirales	f__Lachnospiraceae	g__Jutongia	s__unclassified_g__Jutongia	OTU239	2	0	0	0	0	0	5	0	0	3	0	1
d__Bacteria	k__norank	p__Firmicutes	c__Clostridia	o__Eubacteriales	f__Oscillospiraceae	g__norank_f__Oscillospiraceae	s__unclassified_g__norank_f__Oscillospiraceae	OTU24	30	30	2	0	0	5	8	9	0	14	2	34
d__Bacteria	k__norank	p__Bacteroidetes	c__Bacteroidia	o__Bacteroidales	f__Muribaculaceae	g__norank_f__Muribaculaceae	s__unclassified_g__norank_f__Muribaculaceae	OTU240	0	0	0	0	0	0	0	0	0	0	0	0
d__Bacteria	k__norank	p__Firmicutes	c__Clostridia	o__Lachnospirales	f__Lachnospiraceae	g__norank_f__Lachnospiraceae	s__unclassified_g__norank_f__Lachnospiraceae	OTU241	0	0	0	0	0	0	0	0	0	0	0	0
d__Bacteria	k__norank	p__Firmicutes	c__Bacilli	o__Bacillales	f__Staphylococcaceae	g__Staphylococcus	s__unclassified_g__Staphylococcus	OTU242	1	0	0	0	0	2	1	2	0	4	0	0
d__Bacteria	k__norank	p__Firmicutes	c__Erysipelotrichia	o__Erysipelotrichales	f__Erysipelotrichaceae	g__Turicibacter	s__Turicibacter_bilis	OTU243	0	0	0	0	0	0	0	0	0	0	0	0
d__Bacteria	k__norank	p__Firmicutes	c__Bacilli	o__Lactobacillales	f__Streptococcaceae	g__Streptococcus	s__Streptococcus_thermophilus	OTU244	11	8	11	6	4	12	3	9	3	6	15	3
d__Bacteria	k__norank	p__Proteobacteria	c__Deltaproteobacteria	o__Desulfovibrionales	f__Desulfovibrionaceae	g__Desulfovibrio	s__unclassified_g__Desulfovibrio	OTU245	0	2565	256	4685	0	4680	10784	0	2682	2233	0	6776
d__Bacteria	k__norank	p__Firmicutes	c__Erysipelotrichia	o__Erysipelotrichales	f__Erysipelotrichaceae	g__Faecalibaculum	s__Faecalibaculum_rodentium	OTU246	1677	16	0	1	9730	10148	1267	10	0	1399	1292	0
d__Bacteria	k__norank	p__Firmicutes	c__Bacilli	o__Lactobacillales	f__Lactobacillaceae	g__Lactobacillus	s__Lactobacillus_murinus	OTU247	391	97	256	98	255	540	101	501	108	284	363	110
d__Bacteria	k__norank	p__Firmicutes	c__Bacilli	o__Lactobacillales	f__Streptococcaceae	g__Streptococcus	s__Streptococcus_acidominimus	OTU248	15	15	4	7	5	68	3	5	5	12	9	8
d__Bacteria	k__norank	p__Bacteroidetes	c__Bacteroidia	o__Bacteroidales	f__Muribaculaceae	g__Duncaniella	s__Duncaniella_muris	OTU249	0	0	0	0	0	43	1	0	0	15	0	0
d__Bacteria	k__norank	p__Firmicutes	c__Clostridia	o__Eubacteriales	f__Oscillospiraceae	g__norank_f__Oscillospiraceae	s__unclassified_g__norank_f__Oscillospiraceae	OTU25	169	13	3	33	18	53	4	47	10	40	21	1
d__Bacteria	k__norank	p__Firmicutes	c__Bacilli	o__Lactobacillales	f__Lactobacillaceae	g__Lactobacillus	s__Lactobacillus_johnsonii	OTU250	2574	0	4607	1645	10540	2656	402	408	3006	939	2266	5385
d__Bacteria	k__norank	p__Firmicutes	c__Bacilli	o__Lactobacillales	f__Lactobacillaceae	g__Lactobacillus	s__Lactobacillus_animalis	OTU251	6	1	0	0	1	5	0	0	0	1	0	0
d__Bacteria	k__norank	p__Firmicutes	c__Bacilli	o__Lactobacillales	f__Lactobacillaceae	g__Lactobacillus	s__Lactobacillus_sakei	OTU252	0	0	0	0	0	1	1	0	0	0	0	1
d__Bacteria	k__norank	p__Firmicutes	c__Bacilli	o__Lachnospirales	f__Lachnospiraceae	g__norank_f__Lachnospiraceae	s__unclassified_g__norank_f__Lachnospiraceae	OTU253	78	0	97	37	129	86	17	8	62	15	55	134
d__Bacteria	k__norank	p__Firmicutes	c__Clostridia	o__Peptostreptococcales	f__Peptostreptococcaceae	g__Romboutsia	s__Romboutsia_timonensis	OTU254	168	1	2	0	328	410	8	2	0	6	319	0
d__Bacteria	k__norank	p__Bacteroidetes	c__Bacteroidia	o__Bacteroidales	f__Muribaculaceae	g__norank_f__Muribaculaceae	s__unclassified_g__norank_f__Muribaculaceae	OTU255	123	210	2	759	176	192	48	659	566	279	135	104
d__Bacteria	k__norank	p__Bacteroidetes	c__Bacteroidia	o__Bacteroidales	f__Muribaculaceae	g__norank_f__Muribaculaceae	s__unclassified_g__norank_f__Muribaculaceae	OTU256	0	5	0	0	0	18	1	0	0	27	0	0
d__Bacteria	k__norank	p__Firmicutes	c__Clostridia	o__Lachnospirales	f__Lachnospiraceae	g__Kineothrix	s__unclassified_g__Kineothrix	OTU257	0	0	0	0	8	186	1	0	0	2	67	0
d__Bacteria	k__norank	p__Actinobacteria	c__Actinobacteria	o__Coriobacteriales	f__Kribbibacteriaceae	g__Granulimonas	s__Granulimonas_faecalis	OTU258	0	0	0	0	0	731	26	0	0	106	0	0
d__Bacteria	k__norank	p__Bacteroidetes	c__Bacteroidia	o__Bacteroidales	f__Muribaculaceae_S24-7_group	g__Paramuribaculum	s__Paramuribaculum_intestinale	OTU259	0	22	0	0	0	19	19	0	0	255	0	0
d__Bacteria	k__norank	p__Bacteroidetes	c__Bacteroidia	o__Bacteroidales	f__Porphyromonadaceae	g__Parabacteroides	s__Parabacteroides_goldsteinii	OTU26	70	6	0	17	31	3	4	80	59	6	28	2
d__Bacteria	k__norank	p__Firmicutes	c__Clostridia	o__Eubacteriales	f__Oscillospiraceae	g__Ruminiclostridium_9	s__unclassified_g__Ruminiclostridium_9	OTU260	709	1725	123	502	264	478	765	305	159	1108	695	707
d__Bacteria	k__norank	p__Firmicutes	c__Clostridia	o__Eubacteriales	f__Oscillospiraceae	g__norank_f__Oscillospiraceae	s__unclassified_g__norank_f__Oscillospiraceae	OTU261	14	154	3	7	7	25	66	25	2	194	1	0
d__Bacteria	k__norank	p__Bacteroidetes	c__Bacteroidia	o__Bacteroidales	f__Rikenellaceae	g__Rikenella	s__Rikenella_microfusus	OTU262	0	0	0	0	0	0	0	0	0	0	0	0
d__Bacteria	k__norank	p__Proteobacteria	c__Betaproteobacteria	o__Burkholderiales	f__Burkholderiaceae	g__Burkholderia	s__Burkholderia_contaminans	OTU263	1	0	0	0	0	0	0	1	0	0	0	0
d__Bacteria	k__norank	p__Firmicutes	c__Clostridia	o__Lachnospirales	f__Lachnospiraceae	g__norank_f__Lachnospiraceae	s__unclassified_g__norank_f__Lachnospiraceae	OTU264	0	5	4	1	1	0	4	0	2	3	1	0
d__Bacteria	k__norank	p__Firmicutes	c__Bacilli	o__Bacillales	f__Planococcaceae	g__Sporosarcina	s__Sporosarcina_luteola	OTU265	0	0	0	0	0	0	0	0	0	0	0	0
d__Bacteria	k__norank	p__Firmicutes	c__Clostridia	o__Peptostreptococcales	f__Peptostreptococcaceae	g__Paeniclostridium	s__Paraclostridium_tenue	OTU266	0	1	0	0	0	0	0	1	0	0	0	0
d__Bacteria	k__norank	p__Firmicutes	c__Erysipelotrichia	o__Erysipelotrichales	f__Erysipelotrichaceae	g__norank_f__Erysipelotrichaceae	s__uncultured_Erysipelotrichales_bacterium_g__norank	OTU267	0	0	0	0	0	0	0	0	0	0	0	0
d__Bacteria	k__norank	p__Firmicutes	c__Clostridia	o__Lachnospirales	f__Lachnospiraceae	g__norank_f__Lachnospiraceae	s__unclassified_g__norank_f__Lachnospiraceae	OTU268	3	3	0	5	2	1	1	4	1	0	1	1
d__Bacteria	k__norank	p__Proteobacteria	c__Alphaproteobacteria	o__Rhizobiales	f__Methylobacteriaceae	g__Methylobacterium	s__Methylobacterium_persicinum	OTU269	1	0	0	0	0	0	0	0	0	0	0	0
d__Bacteria	k__norank	p__Firmicutes	c__Clostridia	o__Eubacteriales	f__Oscillospiraceae	g__norank_f__Oscillospiraceae	s__unclassified_g__norank_f__Oscillospiraceae	OTU27	318	0	0	0	136	0	0	188	0	0	94	0
d__Bacteria	k__norank	p__Firmicutes	c__Clostridia	o__Eubacteriales	f__Oscillospiraceae	g__Faecalibacterium	s__Faecalibacterium_prausnitzii	OTU270	0	0	0	0	0	0	0	0	0	2	0	0
d__Bacteria	k__norank	p__Bacteroidetes	c__Bacteroidia	o__Bacteroidales	f__Bacteroidaceae	g__Bacteroides	s__Bacteroides_vulgatus	OTU271	0	0	0	0	0	0	0	0	0	0	0	0
d__Bacteria	k__norank	p__Firmicutes	c__Clostridia	o__Eubacteriales	f__Oscillospiraceae	g__norank_f__Oscillospiraceae	s__unclassified_g__norank_f__Oscillospiraceae	OTU272	0	0	0	0	0	0	0	0	0	0	0	0
d__Bacteria	k__norank	p__Actinobacteria	c__Actinobacteria	o__Nitriliruptorales	f__Nitriliruptoraceae	g__Nitriliruptor	s__Nitriliruptor_alkaliphilus	OTU273	0	0	0	0	0	0	0	0	0	0	0	0
d__Bacteria	k__norank	p__Bacteroidetes	c__Bacteroidia	o__Bacteroidales	f__Muribaculaceae	g__norank_f__Muribaculaceae	s__unclassified_g__norank_f__Muribaculaceae	OTU28	2070	235	4	1279	244	597	211	2164	1362	921	1238	317
d__Bacteria	k__norank	p__Bacteroidetes	c__Bacteroidia	o__Bacteroidales	f__Muribaculaceae	g__norank_f__Muribaculaceae	s__unclassified_g__norank_f__Muribaculaceae	OTU29	0	0	0	5	0	1	1	0	2	2	0	2
d__Bacteria	k__norank	p__Firmicutes	c__Clostridia	o__Eubacteriales	f__Oscillospiraceae	g__norank_f__Oscillospiraceae	s__unclassified_g__norank_f__Oscillospiraceae	OTU3	17	9	0	0	0	4	0	0	0	2	0	0
d__Bacteria	k__norank	p__Bacteroidetes	c__Bacteroidia	o__Bacteroidales	f__Muribaculaceae	g__Sangeribacter	s__Sangeribacter_muris	OTU30	270	171	0	412	84	124	73	32	351	513	104	190
d__Bacteria	k__norank	p__Firmicutes	c__Clostridia	o__Lachnospirales	f__Lachnospiraceae	g__unclassified_f__Lachnospiraceae	s__unclassified_f__Lachnospiraceae	OTU31	18	1979	75	21	6	12	958	162	70	346	48	522
d__Bacteria	k__norank	p__Firmicutes	c__Clostridia	o__Eubacteriales	f__Oscillospiraceae	g__Anaerotruncus	s__unclassified_g__Anaerotruncus	OTU32	10	23	0	0	4	27	5	13	0	4	51	0
d__Bacteria	k__norank	p__Firmicutes	c__Clostridia	o__Eubacteriales	f__Acutalibacteraceae	g__norank_f__Acutalibacteraceae	s__uncultured_g__norank_f__Acutalibacteraceae	OTU33	47	13	0	0	0	6	58	13	0	13	13	0
d__Bacteria	k__norank	p__Bacteroidetes	c__Bacteroidia	o__Bacteroidales	f__Muribaculaceae	g__norank_f__Muribaculaceae	s__unclassified_g__norank_f__Muribaculaceae	OTU34	0	14	0	0	0	13	6	0	0	28	0	0
d__Bacteria	k__norank	p__Firmicutes	c__Clostridia	o__Lachnospirales	f__Lachnospiraceae	g__Coprococcus	s__unclassified_g__Coprococcus	OTU35	18	19	36	3	1	9	8	0	1	3	8	3
d__Bacteria	k__norank	p__Firmicutes	c__Clostridia	o__Lachnospirales	f__Lachnospiraceae	g__Kineothrix	s__unclassified_g__Kineothrix	OTU36	90	120	750	61	9	22	427	64	64	235	182	61
d__Bacteria	k__norank	p__Firmicutes	c__Clostridia	o__Eubacteriales	f__Oscillospiraceae	g__Fumia	s__uncultured_bacterium_g__Fumia	OTU37	19	20	11	10	8	2	33	9	4	29	44	23
d__Bacteria	k__norank	p__Firmicutes	c__Clostridia	o__Lachnospirales	f__Lachnospiraceae	g__Mediterraneibacter	s__Mediterraneibacter_butyricigenes	OTU38	0	7	0	0	0	2	6	1	0	4	0	0
d__Bacteria	k__norank	p__Actinobacteria	c__Actinobacteria	o__Eggerthellales	f__Eggerthellaceae	g__norank_f__Eggerthellaceae	s__unclassified_g__norank_f__Eggerthellaceae	OTU39	5	1	13	6	0	12	2	7	5	0	5	0
d__Bacteria	k__norank	p__Bacteroidetes	c__Bacteroidia	o__Bacteroidales	f__Muribaculaceae	g__norank_f__Muribaculaceae	s__unclassified_g__norank_f__Muribaculaceae	OTU4	236	65	3	208	101	84	71	355	186	259	147	163
d__Bacteria	k__norank	p__unclassified_k__norank	c__unclassified_k__norank	o__unclassified_k__norank	f__unclassified_k__norank	g__unclassified_k__norank	s__unclassified_k__norank	OTU40	0	0	0	0	0	0	0	0	0	0	0	1
d__Bacteria	k__norank	p__Bacteroidetes	c__Bacteroidia	o__Bacteroidales	f__Muribaculaceae	g__norank_f__Muribaculaceae	s__unclassified_g__norank_f__Muribaculaceae	OTU41	0	318	0	0	0	58	139	0	0	950	0	0
d__Bacteria	k__norank	p__Proteobacteria	c__Deltaproteobacteria	o__Desulfovibrionales	f__Desulfovibrionaceae	g__Desulfovibrio	s__unclassified_g__Desulfovibrio	OTU42	0	4	0	1	0	1	37	0	1	0	0	4
d__Bacteria	k__norank	p__Firmicutes	c__Clostridia	o__Lachnospirales	f__Lachnospiraceae	g__Roseburia	s__unclassified_g__Roseburia	OTU43	2	18	1	0	1	0	20	4	1	3	1	4
d__Bacteria	k__norank	p__Actinobacteria	c__Actinobacteria	o__Eggerthellales	f__Eggerthellaceae	g__norank_f__Eggerthellaceae	s__unclassified_g__norank_f__Eggerthellaceae	OTU44	0	4	0	0	0	27	12	0	0	4	0	0
d__Bacteria	k__norank	p__Firmicutes	c__Clostridia	o__Lachnospirales	f__Lachnospiraceae	g__Faecalimonas	s__unclassified_g__Faecalimonas	OTU45	17	58	14	28	6	9	35	6	2	38	43	49
d__Bacteria	k__norank	p__Firmicutes	c__Clostridia	o__Lachnospirales	f__Lachnospiraceae	g__Roseburia	s__unclassified_g__Roseburia	OTU46	2	4	2	2	1	0	14	0	0	2	0	3
d__Bacteria	k__norank	p__Firmicutes	c__Clostridia	o__Eubacteriales	f__norank_o__Eubacteriales	g__norank_o__Eubacteriales	s__unclassified_g__norank_o__Eubacteriales	OTU47	0	12	0	0	1	0	1	2	0	9	2	0
d__Bacteria	k__norank	p__Bacteroidetes	c__Bacteroidia	o__Bacteroidales	f__Muribaculaceae	g__norank_f__Muribaculaceae	s__unclassified_g__norank_f__Muribaculaceae	OTU48	0	11	0	0	0	20	3	0	0	5	0	0
d__Bacteria	k__norank	p__Firmicutes	c__Clostridia	o__Eubacteriales	f__Oscillospiraceae	g__norank_f__Oscillospiraceae	s__unclassified_g__norank_f__Oscillospiraceae	OTU49	0	0	0	0	0	0	0	4	0	0	1	0
d__Bacteria	k__norank	p__Bacteroidetes	c__Bacteroidia	o__Bacteroidales	f__Rikenellaceae	g__Alistipes	s__unclassified_g__Alistipes	OTU5	20	0	0	0	12	0	0	141	0	0	70	0
d__Bacteria	k__norank	p__Firmicutes	c__Clostridia	o__Lachnospirales	f__Lachnospiraceae	g__norank_f__Lachnospiraceae	s__unclassified_g__norank_f__Lachnospiraceae	OTU50	23	10	1	9	0	0	15	2	1	6	17	22
d__Bacteria	k__norank	p__Firmicutes	c__Clostridia	o__Eubacteriales	f__Oscillospiraceae	g__Harryflintia	s__unclassified_g__Harryflintia	OTU51	6	0	0	0	1	0	0	13	0	0	18	0
d__Bacteria	k__norank	p__Firmicutes	c__Clostridia	o__Peptostreptococcales	f__Anaerovoracaceae	g__Aminipila	s__uncultured_bacterium_g__Aminipila	OTU52	12	3	0	4	8	7	2	14	1	4	8	7
d__Bacteria	k__norank	p__Firmicutes	c__Clostridia	o__Eubacteriales	f__Oscillospiraceae	g__Harryflintia	s__Harryflintia_acetispora	OTU53	18	10	0	11	2	5	14	70	2	7	21	20
d__Bacteria	k__norank	p__Firmicutes	c__Clostridia	o__Eubacteriales	f__Peptococcaceae	g__Dehalobacterium	s__unclassified_g__Dehalobacterium	OTU54	5	3	0	6	0	2	1	15	0	4	5	0
d__Bacteria	k__norank	p__Bacteroidetes	c__Bacteroidia	o__Bacteroidales	f__Muribaculaceae	g__norank_f__Muribaculaceae	s__unclassified_g__norank_f__Muribaculaceae	OTU55	253	426	0	0	279	56	55	594	0	1528	110	0
d__Bacteria	k__norank	p__Firmicutes	c__Clostridia	o__Eubacteriales	f__Peptococcaceae	g__norank_f__Peptococcaceae	s__unclassified_g__norank_f__Peptococcaceae	OTU56	66	70	8	69	22	52	26	95	30	75	82	30
d__Bacteria	k__norank	p__Firmicutes	c__Clostridia	o__Christensenellales	f__Christensenellaceae	g__norank_f__Christensenellaceae	s__unclassified_g__norank_f__Christensenellaceae	OTU57	0	0	0	0	0	0	0	3	0	0	5	0
d__Bacteria	k__norank	p__Firmicutes	c__Erysipelotrichia	o__Erysipelotrichales	f__Coprobacillaceae	g__Longibaculum	s__unclassified_g__Longibaculum	OTU58	20	0	0	0	2	1	0	23	0	0	2	0
d__Bacteria	k__norank	p__Actinobacteria	c__Actinobacteria	o__Eggerthellales	f__Eggerthellaceae	g__Adlercreutzia	s__Adlercreutzia_mucosicola	OTU59	93	111	75	93	164	164	30	56	44	147	33	28
d__Bacteria	k__norank	p__Firmicutes	c__Clostridia	o__Lachnospirales	f__Lachnospiraceae	g__Roseburia	s__Roseburia_intestinalis	OTU6	158	41	1	194	20	148	47	89	78	65	189	161
d__Bacteria	k__norank	p__Firmicutes	c__Clostridia	o__Eubacteriales	f__Clostridiaceae	g__Clostridium	s__unclassified_g__Clostridium	OTU60	62	78	477	11	6	7	48	52	16	46	21	26
d__Bacteria	k__norank	p__Firmicutes	c__Erysipelotrichia	o__Erysipelotrichales	f__Erysipelotrichaceae	g__Faecalitalea	s__Faecalitalea_dolichum	OTU61	5	5	20	13	0	4	0	19	11	0	5	9
d__Bacteria	k__norank	p__Firmicutes	c__Clostridia	o__Eubacteriales	f__Oscillospiraceae	g__Neglectibacter	s__Neglectibacter_timonensis	OTU62	27	76	13	26	12	7	29	11	3	29	37	13
d__Bacteria	k__norank	p__Bacteroidetes	c__Bacteroidia	o__Bacteroidales	f__Muribaculaceae	g__norank_f__Muribaculaceae	s__unclassified_g__norank_f__Muribaculaceae	OTU63	10	0	0	6	1	0	0	6	5	0	1	0
d__Bacteria	k__norank	p__Proteobacteria	c__Betaproteobacteria	o__Burkholderiales	f__Sutterellaceae	g__Turicimonas	s__Turicimonas_muris	OTU64	0	3	0	9	0	0	4	0	14	8	0	3
d__Bacteria	k__norank	p__Bacteroidetes	c__Bacteroidia	o__Bacteroidales	f__Bacteroidaceae	g__Phocaeicola	s__unclassified_g__Phocaeicola	OTU65	0	3006	2	4707	1	731	804	1	7439	3540	0	2769
d__Bacteria	k__norank	p__Bacteroidetes	c__Bacteroidia	o__Bacteroidales	f__Rikenellaceae	g__Alistipes	s__uncultured_bacterium_g__Alistipes	OTU66	216	64	1	242	76	35	38	1066	220	171	191	22
d__Bacteria	k__norank	p__Bacteroidetes	c__Bacteroidia	o__Bacteroidales	f__Muribaculaceae	g__norank_f__Muribaculaceae	s__unclassified_g__norank_f__Muribaculaceae	OTU67	1	0	0	10	1	0	0	8	40	0	2	1
d__Bacteria	k__norank	p__Firmicutes	c__Clostridia	o__Eubacteriales	f__Oscillospiraceae	g__Anaerotruncus	s__Anaerotruncus_colihominis	OTU68	34	19	12	13	2	8	79	45	12	55	27	32
d__Bacteria	k__norank	p__Bacteroidetes	c__Bacteroidia	o__Bacteroidales	f__Muribaculaceae	g__norank_f__Muribaculaceae	s__unclassified_g__norank_f__Muribaculaceae	OTU69	0	2	0	39	0	1	0	0	69	13	0	8
d__Bacteria	k__norank	p__Firmicutes	c__Clostridia	o__Christensenellales	f__Christensenellaceae	g__norank_f__Christensenellaceae	s__unclassified_g__norank_f__Christensenellaceae	OTU7	192	292	3	1212	0	243	77	1290	328	180	1101	21
d__Bacteria	k__norank	p__Bacteroidetes	c__Bacteroidia	o__Bacteroidales	f__Muribaculaceae	g__norank_f__Muribaculaceae	s__unclassified_g__norank_f__Muribaculaceae	OTU70	6	1	0	34	4	3	0	27	52	3	1	4
d__Bacteria	k__norank	p__Bacteroidetes	c__Bacteroidia	o__Bacteroidales	f__Muribaculaceae	g__norank_f__Muribaculaceae	s__unclassified_g__norank_f__Muribaculaceae	OTU72	0	1	0	42	0	5	4	3	88	11	1	13
d__Bacteria	k__norank	p__Bacteroidetes	c__Bacteroidia	o__Bacteroidales	f__Muribaculaceae	g__norank_f__Muribaculaceae	s__unclassified_g__norank_f__Muribaculaceae	OTU73	985	219	2	1637	1688	513	69	2880	2609	1621	177	266
d__Bacteria	k__norank	p__Bacteroidetes	c__Bacteroidia	o__Bacteroidales	f__Muribaculaceae	g__norank_f__Muribaculaceae	s__unclassified_g__norank_f__Muribaculaceae	OTU74	603	706	1	15	20	812	130	1	570	1104	12	167
d__Bacteria	k__norank	p__Bacteroidetes	c__Bacteroidia	o__Bacteroidales	f__Rikenellaceae	g__Alistipes	s__uncultured_bacterium_g__Alistipes	OTU75	0	74	3	158	0	121	65	0	300	59	0	50
d__Bacteria	k__norank	p__Bacteroidetes	c__Bacteroidia	o__Bacteroidales	f__Muribaculaceae	g__norank_f__Muribaculaceae	s__unclassified_g__norank_f__Muribaculaceae	OTU76	5	0	0	46	1	0	0	9	38	0	13	7
d__Bacteria	k__norank	p__Bacteroidetes	c__Bacteroidia	o__Bacteroidales	f__Bacteroidaceae	g__Bacteroides	s__Bacteroides_acidifaciens	OTU77	544	0	1	1032	199	0	0	1867	1714	0	911	154
d__Bacteria	k__norank	p__Bacteroidetes	c__Bacteroidia	o__Bacteroidales	f__Muribaculaceae	g__norank_f__Muribaculaceae	s__unclassified_g__norank_f__Muribaculaceae	OTU78	84	47	0	167	24	45	15	38	107	138	25	47
d__Bacteria	k__norank	p__Firmicutes	c__Clostridia	o__Eubacteriales	f__Clostridiaceae	g__Clostridium	s__Clostridium_subterminale	OTU79	0	0	0	0	0	0	0	0	0	0	0	0
d__Bacteria	k__norank	p__Firmicutes	c__Clostridia	o__Lachnospirales	f__Lachnospiraceae	g__unclassified_f__Lachnospiraceae	s__unclassified_f__Lachnospiraceae	OTU8	33	0	0	34	13	9	9	0	0	0	9	42
d__Bacteria	k__norank	p__Proteobacteria	c__Betaproteobacteria	o__Burkholderiales	f__Oxalobacteraceae	g__Janthinobacterium	s__Janthinobacterium_lividum	OTU80	0	0	0	0	0	0	0	0	0	0	0	0
d__Bacteria	k__norank	p__Firmicutes	c__Clostridia	o__Eubacteriales	f__Clostridiaceae	g__Clostridium	s__Clostridium_pascui	OTU81	0	0	0	0	0	0	0	0	0	0	0	0
d__Bacteria	k__norank	p__Proteobacteria	c__Gammaproteobacteria	o__Pseudomonadales	f__Pseudomonadaceae	g__Geopseudomonas	s__Geopseudomonas guangdongensis	OTU82	0	0	0	0	0	0	0	0	0	0	0	0
d__Bacteria	k__norank	p__Firmicutes	c__Clostridia	o__Eubacteriales	f__Clostridiaceae	g__Clostridium_sensu_stricto_3	s__Clostridium_amylolyticum	OTU83	0	0	0	0	0	0	0	0	0	0	0	0
d__Bacteria	k__norank	p__Proteobacteria	c__Betaproteobacteria	o__Rhodocyclales	f__Sterolibacteriaceae	g__Denitratisoma	s__unclassified_g__Denitratisoma	OTU84	0	0	0	0	0	0	0	0	0	0	0	0
d__Bacteria	k__norank	p__Proteobacteria	c__Gammaproteobacteria	o__Enterobacteriales	f__Enterobacteriaceae	g__Citrobacter	s__Citrobacter_freundii	OTU85	1	0	0	0	0	0	0	0	1	0	1	0
d__Bacteria	k__norank	p__Proteobacteria	c__Gammaproteobacteria	o__Pseudomonadales	f__Pseudomonadaceae	g__Pseudomonas	s__unclassified_g__Pseudomonas	OTU86	0	0	0	0	0	0	0	0	0	0	0	0
d__Bacteria	k__norank	p__Firmicutes	c__Erysipelotrichia	o__Erysipelotrichales	f__Erysipelotrichaceae	g__norank_f__Erysipelotrichaceae	s__uncultured_bacterium_g__norank_f__Erysipelotrichaceae	OTU87	0	0	0	0	0	0	0	0	0	0	2	0
d__Bacteria	k__norank	p__Proteobacteria	c__Betaproteobacteria	o__Burkholderiales	f__Comamonadaceae	g__Comamonas	s__Comamonas_testosteroni	OTU88	0	0	0	0	0	0	0	0	0	0	0	0
d__Bacteria	k__norank	p__Firmicutes	c__Clostridia	o__Eubacteriales	f__Clostridiaceae	g__Clostridium	s__Clostridium_punense	OTU89	0	0	0	0	0	0	0	0	0	0	0	0
d__Bacteria	k__norank	p__Firmicutes	c__Clostridia	o__Clostridiales	f__Family_XIII	g__[Eubacterium]_brachy_group	s__uncultured_bacterium_g__[Eubacterium]_brachy_group	OTU9	74	13	0	0	8	3	3	15	0	28	4	0
d__Bacteria	k__norank	p__Pseudomonadati	c__Betaproteobacteria	o__Burkholderiales	f__Comamonadaceae	g__norank_f__Comamonadaceae	s__unclassified_g__norank_f__Comamonadaceae	OTU90	0	0	0	0	0	0	0	0	0	0	0	0
d__Bacteria	k__norank	p__Firmicutes	c__Bacilli	o__Lactobacillales	f__Carnobacteriaceae	g__Trichococcus	s__Trichococcus_shcherbakoviae	OTU91	0	0	0	0	0	0	0	0	0	0	0	0
d__Bacteria	k__norank	p__Chlorobi	c__Chlorobia	o__Chlorobiales	f__Chitinophagaceae	g__norank_f__Chitinophagaceae	s__unclassified_g__norank_f__Chitinophagaceae	OTU92	0	0	0	0	0	0	0	0	0	0	0	0
d__Bacteria	k__norank	p__Proteobacteria	c__Gammaproteobacteria	o__Pseudomonadales	f__Pseudomonadaceae	g__Pseudomonas	s__unclassified_g__Pseudomonas	OTU93	0	0	0	0	0	0	0	0	0	0	0	0
d__Bacteria	k__norank	p__Bacteroidetes	c__Flavobacteriia	o__Flavobacteriales	f__Flavobacteriaceae	g__Cloacibacterium	s__Cloacibacterium_normanense	OTU94	0	0	0	0	0	0	0	0	0	0	0	0
d__Bacteria	k__norank	p__Bacteroidetes	c__Bacteroidia	o__Bacteroidales	f__Tannerellaceae	g__Parabacteroides	s__Parabacteroides_chartae	OTU95	0	0	0	0	0	0	0	0	0	0	0	0
d__Bacteria	k__norank	p__Proteobacteria	c__Alphaproteobacteria	o__Rickettsiales	f__Mitochondria	g__norank_f__Mitochondria	s__unclassified_g__norank_f__Mitochondria	OTU96	0	0	0	0	0	0	0	0	0	0	0	0
d__Bacteria	k__norank	p__Firmicutes	c__Clostridia	o__Eubacteriales	f__Oscillospiraceae	g__norank_f__Oscillospiraceae	s__unclassified_g__norank_f__Oscillospiraceae	OTU97	0	19	0	0	0	1	0	0	0	20	0	0
d__Bacteria	k__norank	p__Firmicutes	c__Clostridia	o__Eubacteriales	f__Oscillospiraceae	g__Marasmitruncus	s__unclassified_g__Marasmitruncus	OTU98	16	5	4	7	0	10	13	15	2	13	15	8
d__Bacteria	k__norank	p__Firmicutes	c__Clostridia	o__Lachnospirales	f__Lachnospiraceae	g__Acetatifactor	s__unclassified_g__Acetatifactor	OTU99	4	581	1	0	6	1	9	4	3	3	44	5

## Sheet: Supplementary Table 2
Supplementary Table 2. Relative abundances of obesity-associated bacterial taxa and correlations with body mass index (BMI).
Group	Batch	SEX	AGE	BMI	Anaerotruncus_colihominis	Adlercreutzia_equolifaciens	Holdemania_filiformis
normal weight	1	male	23	18.5124	0	0.0001512	0.0019167
normal weight	1	male	22	18.5911	6.28e-05	0.0001882	0.0013613
normal weight	1	male	23	18.5918	0	0	0
normal weight	2	female	24	18.5947	2.36e-05	0.0001097	0.0003492
normal weight	2	female	24	18.6012	2.94e-05	0.000167	0.0001799
normal weight	2	female	30	18.6277	0	0	0.0002868
normal weight	1	female	24	18.6709	0.0015006	0.0001041	0.0013849
normal weight	2	male	26	18.6874	0	0.0012063	0.0002395
normal weight	1	male	27	18.7444	1.1e-05	0	8.52e-05
normal weight	2	male	28	18.7476	0	0	0
normal weight	2	male	48	18.7483	0	0	2.83e-05
normal weight	1	female	24	18.75	0.0025815	0	0
normal weight	2	female	20	18.7888	0	7.79e-05	5.94e-05
normal weight	1	female	25	18.7962	0	0.0001278	0.0002486
normal weight	1	female	27	18.8189	5.09e-05	0.0002307	0.0004784
normal weight	2	male	22	18.8408	0.0001095	1.83e-05	0.0001177
normal weight	1	female	23	18.8492	0.0003598	3.72e-05	0.0001275
normal weight	1	female	20	18.9036	0	0.0002601	4.8e-06
normal weight	2	male	27	18.9037	0.0003602	0.0008127	0.0005976
normal weight	2	female	26	18.9422	0.0015572	0.0001577	0
normal weight	1	female	23	18.9453	0.0001367	0	0
normal weight	2	female	23	18.9453	0.0002959	0	0
normal weight	2	female	27	18.9631	7.6e-06	0.0001929	0.0005131
normal weight	2	female	21	18.9873	7.6e-06	0.0003183	0.0001109
normal weight	1	male	19	18.9919	0	0.0003701	0.0005551
normal weight	2	male	27	19.0004	0.002639	0.0003484	0.0122053
normal weight	1	female	23	19.0039	0.0004597	0.0004403	0.0013461
normal weight	1	female	27	19.0039	0	0.0001953	0
normal weight	1	male	23	19.0217	0	0	0
normal weight	2	female	24	19.0253	0.0001815	0.0007315	0.0013311
normal weight	2	male	33	19.0397	5.55e-05	0	0
normal weight	1	female	22	19.052	0	0	0
normal weight	1	male	24	19.0644	7.87e-05	6.03e-05	9.81e-05
normal weight	1	female	22	19.0657	0.0001673	0.0004765	0.0003234
normal weight	1	male	25	19.0965	0.0001734	0	0.0003316
normal weight	1	male	23	19.1527	0	8.1e-05	0.0004803
normal weight	2	male	57	19.1579	0.0009436	0.0029536	0
normal weight	2	male	27	19.1645	0.0006033	0	0.0024688
normal weight	1	female	22	19.1736	0.0016118	0	0.0011859
normal weight	2	female	25	19.1844	0.0002456	0.0005415	0
normal weight	1	female	23	19.2044	2.76e-05	9.47e-05	0
normal weight	1	female	23	19.2044	0	0.0027895	0.001825
normal weight	2	male	23	19.222	0.0005892	0.0001289	0.0042443
normal weight	2	female	23	19.222	0	6.59e-05	0.0003259
normal weight	1	male	23	19.257	0	0	0.0001664
normal weight	1	female	24	19.2578	0.0005296	3.9e-06	0.0001931
normal weight	1	male	23	19.2672	0	9.58e-05	0
normal weight	2	female	30	19.2948	0	0	0
normal weight	2	female	27	19.3098	0.0001275	0.0004648	0.0004881
normal weight	1	female	24	19.3359	0	0.0008781	0
normal weight	1	female	25	19.3359	0.0003018	0.003051	0.0007074
normal weight	2	male	24	19.3424	0.0001033	0	0.0002997
normal weight	2	female	44	19.3896	2.28e-05	0.0003538	0.0002753
normal weight	1	female	22	19.3949	0	0.0026106	0.0003554
normal weight	2	male	30	19.415	7.6e-05	0	0.0003087
normal weight	2	female	22	19.4674	0.0017132	0	0.001257
normal weight	1	male	21	19.4737	0	0	0
normal weight	1	male	23	19.475	0	0	8.04e-05
normal weight	1	female	25	19.4825	5.27e-05	0.003929	0.0008342
normal weight	2	male	26	19.5288	6.27e-05	0.0001052	0.000172
normal weight	1	female	24	19.5312	0.0003967	2.84e-05	4.57e-05
normal weight	1	female	27	19.5312	0.0001675	0.0006174	0.0001125
normal weight	1	female	23	19.5473	6.6e-06	0	4.04e-05
normal weight	1	female	24	19.5534	0	0.0025172	0.000595
normal weight	2	male	18	19.5721	4.83e-05	0	3.38e-05
normal weight	2	female	26	19.5951	0	3.84e-05	0
normal weight	2	male	25	19.5999	0	0.0002248	0.0003679
normal weight	2	female	51	19.6094	6.93e-05	6.48e-05	0
normal weight	1	female	23	19.6616	1.43e-05	0.000733	0.0001151
normal weight	2	female	25	19.6772	0	0	3.25e-05
normal weight	2	female	31	19.6995	0	6.2e-05	0.0003742
normal weight	1	female	24	19.7055	2.22e-05	0.0010845	0.0001678
normal weight	2	male	28	19.7098	0.0001068	0.0001817	0.000152
normal weight	1	female	23	19.7294	0	0	0
normal weight	1	female	25	19.7711	0.0003334	0.0092012	0
normal weight	2	female	35	19.7777	0.0003278	3.35e-05	0.0002778
normal weight	2	female	48	19.7799	8.24e-05	3.9e-06	0.0004243
normal weight	2	male	39	19.8177	2.63e-05	0.0008548	0
normal weight	1	male	23	19.827	1.01e-05	7.48e-05	0
normal weight	2	female	37	19.8413	0.0008631	0.0019055	0.00094
normal weight	2	female	24	19.8681	0	0	0
normal weight	1	female	21	19.8728	0	0	0.000195
normal weight	1	female	23	19.8728	0.0011228	0.006343	5.39e-05
normal weight	2	female	27	19.8828	0	0	0.0001361
normal weight	2	male	34	19.8998	6.35e-05	7.95e-05	0.0001758
normal weight	1	female	22	19.9219	0.0008103	1.06e-05	0.0002062
normal weight	1	female	25	19.9219	0.000399	0.0003257	0.0001147
normal weight	2	female	24	19.9231	0.0002712	6.09e-05	0.0001978
normal weight	2	male	54	19.951	8.9e-06	0.0004886	0.0002861
normal weight	2	male	24	19.9628	0.0002812	0.0017006	0.0014454
normal weight	2	female	39	20.02	8.43e-05	0.0007207	0.0009607
normal weight	2	female	22	20.0288	0	0	0
normal weight	2	female	20	20.035	0	2.85e-05	9.5e-05
normal weight	1	female	23	20.0414	0.000271	0.0001642	0.0002062
normal weight	2	male	45	20.0474	0.000116	0.0004263	0.0003119
normal weight	1	male	23	20.0784	0	0	0.000143
normal weight	1	female	24	20.1172	0	0.0021395	0.000136
normal weight	2	female	40	20.1288	0	0.0003129	0.0001778
normal weight	2	male	29	20.1912	6.12e-05	0.0007519	0.002789
normal weight	1	female	23	20.1951	0	0.0003834	0.000178
normal weight	2	male	27	20.1995	0.0001027	5.99e-05	0.0001721
normal weight	1	female	26	20.202	0.000105	0	0.0003436
normal weight	1	female	22	20.2115	0	0.0009296	0
normal weight	1	female	23	20.2289	0.0004735	8.53e-05	0.0003287
normal weight	2	female	33	20.2501	5.7e-06	0	0
normal weight	1	female	24	20.2812	0.0001155	0	0.000429
normal weight	1	female	25	20.3125	7.1e-06	1.17e-05	7.64e-05
normal weight	2	female	51	20.3361	0.0003483	0.0002253	0.000152
normal weight	1	female	22	20.3621	0	8.38e-05	0
normal weight	2	male	35	20.3654	0	0	0.0001881
normal weight	2	female	23	20.3727	8.99e-05	0.0004402	0.0001345
normal weight	2	male	32	20.3894	0	7.07e-05	0.0002246
normal weight	2	female	23	20.3954	0	0.0002702	0.0003702
normal weight	2	male	26	20.3971	0.000158	0.0004055	0.0002922
normal weight	1	female	22	20.4	0.0013678	0.0033106	0.0017514
normal weight	2	female	45	20.4111	0.0001615	0.0001364	0
normal weight	1	female	25	20.4152	0.0001609	0.0004155	6.39e-05
normal weight	2	female	25	20.4294	6.66e-05	0.0001028	0
normal weight	2	male	21	20.4408	0.0005169	0.0002081	0.0006052
normal weight	2	male	25	20.475	0	0	0
normal weight	1	female	22	20.4959	0	5.3e-06	9.34e-05
normal weight	2	female	34	20.5021	0.0003367	0	0.0007916
normal weight	1	male	24	20.5078	0	0.0002047	0.0002602
normal weight	2	female	33	20.5499	0	0	0.0005422
normal weight	2	female	38	20.5516	0.0002641	0.0024424	0.0023332
normal weight	1	female	28	20.5688	0.0002322	0.0002221	0
normal weight	2	female	41	20.5688	0	6.65e-05	0.0002181
normal weight	1	female	23	20.5761	5.8e-06	0.0007881	0
normal weight	2	female	23	20.5979	0	0.0003595	0.0002703
normal weight	2	female	24	20.6011	8.76e-05	0.0001333	0.0004231
normal weight	2	female	43	20.6012	0.0014129	0.0003312	0.0018589
normal weight	1	female	24	20.6452	0.00024	0	0.001917
normal weight	2	female	24	20.6452	0.0002874	0	0.0140866
normal weight	1	male	24	20.6747	1.21e-05	0.0003101	0.0020637
normal weight	2	female	22	20.702	0.0009166	0	0.0007616
normal weight	1	male	26	20.7031	3.51e-05	0.0001627	0.0004306
normal weight	2	female	52	20.7031	0.0013485	6.16e-05	0
normal weight	2	female	45	20.7311	0.0001649	0.0023724	0.0010642
normal weight	1	female	24	20.7422	0	0	0
normal weight	2	female	46	20.7612	5.09e-05	0.000147	5.14e-05
normal weight	1	female	23	20.7838	2.09e-05	0.00196	0
normal weight	1	male	24	20.8048	8.45e-05	0	0.0006822
normal weight	2	female	33	20.8203	0.0020633	0.0002217	0.0011522
normal weight	2	male	29	20.8307	4.75e-05	0.000114	0.000292
normal weight	2	female	34	20.8512	7.43e-05	0.0001105	0.0011746
normal weight	1	female	20	20.8528	0	3.47e-05	5.07e-05
normal weight	2	female	36	20.8694	0.0003259	0	0.000196
normal weight	2	female	30	20.8793	0.0057456	0.0016025	9.74e-05
normal weight	2	female	24	20.8954	6.9e-05	0.0001729	0.0001729
normal weight	2	female	30	20.9375	0	0.0002296	0
normal weight	2	male	25	20.9402	0.0001124	0	0
normal weight	2	male	40	20.9402	4.2e-06	0	0.0025095
normal weight	1	female	21	20.9734	0	0	0
normal weight	2	male	26	20.976	0	2.71e-05	0.002726
normal weight	1	male	20	20.9818	0	0	0
normal weight	2	male	22	20.9877	0.00026	0.0001931	0.0001227
normal weight	1	female	22	21.0381	0	0.0002639	0
normal weight	2	female	24	21.0547	0	5.66e-05	0.0002816
normal weight	2	female	40	21.064	0.0004951	0.0003054	0.0003282
normal weight	1	female	23	21.0772	0.0006044	0.0035588	0.0004309
normal weight	1	female	25	21.0812	0	0.0035676	3.77e-05
normal weight	1	male	26	21.1265	0	0	0
normal weight	1	male	24	21.1306	0	0	2.95e-05
normal weight	1	female	22	21.1368	0.0001611	8.27e-05	0.0008594
normal weight	1	male	23	21.1463	0.0019326	0.0003776	0.0019902
normal weight	2	male	27	21.1601	2.56e-05	0	0.0008433
normal weight	2	female	53	21.2071	7.39e-05	8.67e-05	0.0008006
normal weight	1	male	23	21.21	0	0	0
normal weight	1	female	23	21.2306	0.0011734	0.0001616	0.0003646
normal weight	2	female	44	21.2405	1.19e-05	0	0.0001789
normal weight	2	male	46	21.241	0.0008311	0.0005391	0.0023622
normal weight	1	female	21	21.2672	0	0.0005286	0.0004424
normal weight	2	male	56	21.2683	0.0007422	0	0.000584
normal weight	2	male	39	21.2726	1.57e-05	5.64e-05	0.0005693
normal weight	2	male	35	21.3839	0.0002176	0.0007245	0.0019219
normal weight	2	male	50	21.3946	0.0004351	0.000209	0
normal weight	2	female	35	21.4112	0.001471	0.0004266	0.0001163
normal weight	2	male	41	21.427	9.65e-05	0.0001269	1.48e-05
normal weight	2	male	27	21.4531	0.0055845	0.0004311	0.0014427
normal weight	2	female	41	21.4536	0.0005988	1.39e-05	0
normal weight	2	male	30	21.4536	0	0	0.0005342
normal weight	2	male	20	21.4584	6.46e-05	0.0003761	0.0002963
normal weight	1	male	24	21.5139	0	0.0008936	0
normal weight	1	male	22	21.5243	6.66e-05	0	0.0017785
normal weight	1	female	25	21.5625	0.000144	0	0.0005289
normal weight	1	female	24	21.5645	0.0008918	0	0
normal weight	2	male	43	21.5682	5.6e-05	0	0.000279
normal weight	2	male	47	21.5719	0	1.21e-05	0.0022358
normal weight	2	male	29	21.58	9.33e-05	0	0.0001607
normal weight	2	female	34	21.6041	0.0009183	0.0009665	0.0028711
normal weight	2	male	24	21.6049	8.43e-05	0.0001879	2.36e-05
normal weight	2	female	45	21.6141	0.0001008	0.0007297	0.0001264
normal weight	2	male	26	21.6178	6.8e-05	0.0006208	0.0010873
normal weight	1	female	22	21.6712	2.77e-05	0	0.0001517
normal weight	2	female	24	21.6713	0	5.56e-05	0
normal weight	1	female	23	21.6813	0.0002291	0	0.0004805
normal weight	2	male	31	21.6829	0.0004138	0	0.0002316
normal weight	2	male	28	21.6942	0	0.0006989	0.0001412
normal weight	2	male	50	21.703	0	0.0003906	0
normal weight	2	male	30	21.7063	7.95e-05	1.39e-05	0.00019
normal weight	2	male	56	21.711	0	0	0.0019197
normal weight	2	female	44	21.7578	0	0	0
normal weight	2	male	29	21.7685	0	3.23e-05	0.0005159
normal weight	2	male	48	21.7776	7.29e-05	0.0004887	0.0010723
normal weight	2	female	37	21.8336	3.9e-05	0.0003608	8.21e-05
normal weight	1	male	26	21.8407	7.07e-05	0.0001367	0.0006593
normal weight	2	male	40	21.8517	0	0	0.00014
normal weight	1	female	24	21.862	0	0	0
normal weight	1	female	25	21.875	0	0	0
normal weight	2	male	26	21.8851	0	0.0001603	4.27e-05
normal weight	1	female	21	21.8963	0	0	0.0005413
normal weight	2	female	26	21.8969	0.0002243	0.0009232	0.0004772
normal weight	2	female	26	21.918	7.74e-05	3.16e-05	0.0005197
normal weight	2	female	52	21.9441	0	0	0.0001332
normal weight	2	male	25	21.9723	0.0047385	0.000256	0
normal weight	2	male	28	21.9753	0	0	0
normal weight	2	male	27	21.9888	0	0	0.0001555
normal weight	2	male	30	22.0243	0.0007451	1.68e-05	0.0004018
normal weight	2	male	27	22.038	4.52e-05	3.25e-05	0
normal weight	2	male	29	22.038	0	0.0001339	0
normal weight	2	female	27	22.0753	0.0002995	0.0001561	0.0003073
normal weight	2	female	25	22.0931	0	0	0
normal weight	2	male	29	22.0993	0	0	0
normal weight	1	male	25	22.1003	0	2.18e-05	0.000225
normal weight	2	male	28	22.1065	9.36e-05	0.0001357	0.000299
normal weight	2	female	28	22.1072	0.000176	0.0001574	0.0010085
normal weight	2	male	28	22.1088	2.45e-05	0.000447	0.0002187
normal weight	2	female	27	22.1311	0.000195	0	0.0001488
normal weight	2	male	22	22.1388	6.57e-05	7.6e-05	0.0001595
normal weight	2	male	27	22.1513	0.0001564	0	0.000208
normal weight	1	male	24	22.2138	0	0.0011669	4.45e-05
normal weight	2	male	21	22.2291	1.97e-05	0	0.0001405
normal weight	1	female	23	22.2656	0	5.22e-05	0
normal weight	2	female	38	22.3047	0.0001959	0.0003023	0.0012637
normal weight	2	female	25	22.3081	0.000425	0.0001387	3.34e-05
normal weight	2	female	33	22.3569	0.000217	9.59e-05	0.0002446
normal weight	1	male	26	22.3954	9.6e-05	0	0
normal weight	1	male	23	22.4047	0.0002048	0.0003915	0
normal weight	1	male	24	22.409	0	0	0.0001019
normal weight	2	female	30	22.4103	0	0	0
normal weight	2	female	30	22.4461	0.0001468	3.12e-05	0.0003836
normal weight	2	male	28	22.4642	0	0	0.0127185
normal weight	2	male	26	22.4653	7.16e-05	0	5.52e-05
normal weight	2	male	29	22.4936	3.6e-06	0.0001216	0.0007097
normal weight	2	male	35	22.4996	5.45e-05	0	0.0002887
normal weight	2	male	58	22.5076	1.05e-05	2.13e-05	0
normal weight	1	male	22	22.5132	0	0.0012495	6.62e-05
normal weight	2	male	28	22.5516	0.0019483	0	0
normal weight	1	male	24	22.5981	7.2e-05	0.0002655	9.49e-05
normal weight	2	male	29	22.6183	0.0021298	0.0004278	0.0016581
normal weight	2	female	48	22.6326	0	7.09e-05	0.0003318
normal weight	2	female	26	22.6414	5.77e-05	0.0003826	0.0001948
normal weight	1	female	25	22.6652	0.0003641	0	0.0014848
normal weight	2	male	34	22.695	0.0002857	0	0.0015564
normal weight	1	female	22	22.7233	0	0	6.69e-05
normal weight	2	male	55	22.7467	0.0026665	0.0001506	0.0030285
normal weight	2	male	25	22.7724	0	7.74e-05	0
normal weight	2	male	33	22.7833	0.0007216	0.0002403	0.0004649
normal weight	2	male	51	22.8107	0.0003001	0.0004319	0.001043
normal weight	2	male	25	22.8145	3.81e-05	0.0001029	0.0001403
normal weight	2	male	39	22.8241	0	0	0.0004397
normal weight	2	male	30	22.8305	0	0	0
normal weight	2	male	35	22.8502	0.0007776	2.16e-05	0
normal weight	1	female	22	22.8928	0.0005934	0.0008687	0.0007901
normal weight	2	male	26	22.9066	1.74e-05	6.07e-05	0
normal weight	2	male	34	22.9687	0.0002357	0	0.0004702
normal weight	2	male	27	22.9779	0	0	0
normal weight	2	male	30	22.9878	0	0	6.8e-06
normal weight	2	female	40	23.0077	0.0001035	0.000342	0
normal weight	2	female	30	23.0345	0.0005167	0.0004444	0.0002992
normal weight	2	male	25	23.045	0	0	0
normal weight	2	male	42	23.045	8.66e-05	0	4.6e-05
normal weight	2	male	49	23.0457	0.0002113	0	0.0009022
normal weight	2	male	50	23.0533	6.37e-05	4.06e-05	0
normal weight	2	male	28	23.0777	1.6e-06	0.0026792	0
normal weight	2	male	26	23.0822	0.0002005	0	0.0005254
normal weight	2	male	28	23.1206	0.000257	0.0006091	0.0001275
normal weight	2	male	28	23.1221	0	0	2.66e-05
normal weight	2	male	58	23.1347	0	0	0
normal weight	2	male	30	23.1678	0	0	0.0009011
normal weight	2	male	37	23.1709	0	0.0001059	0
normal weight	2	male	30	23.1735	0	0	0
normal weight	2	male	22	23.1834	0.0006434	0.0002912	0
normal weight	2	male	31	23.2196	5.39e-05	0.0003672	0.0011229
normal weight	2	male	44	23.2386	0	0	0.0007877
normal weight	2	male	40	23.2565	0.00021	0.0009266	0
normal weight	2	male	33	23.3657	5.28e-05	0.0001478	0.001328
normal weight	2	male	43	23.3876	0.0006884	0.0001724	0.0002868
normal weight	2	male	56	23.3894	0.0041751	0.0038225	0
normal weight	2	male	42	23.4555	0	0	0
normal weight	2	male	53	23.4722	0	0	0
normal weight	2	female	32	23.4952	0	0.000556	0.0004183
normal weight	2	male	37	23.5175	0	1.87e-05	0
normal weight	2	female	43	23.5409	0.0001066	0	0
normal weight	2	female	49	23.5445	0.0002853	0.0001417	0.0001656
normal weight	2	male	58	23.56	0.000466	0.0004937	0.0010872
normal weight	2	male	35	23.5628	0.0002725	0.0008634	0
normal weight	2	male	36	23.598	9.59e-05	0	0.0013429
normal weight	2	female	39	23.6046	0.0001287	0	0
normal weight	2	female	42	23.6215	0.0010563	0.0001672	0.0011317
normal weight	2	male	56	23.6336	0.0006394	0.0018068	0.0002573
normal weight	2	male	27	23.6418	7.88e-05	5.53e-05	0.0007285
normal weight	2	male	34	23.6605	0	0	0
normal weight	2	female	47	23.6614	2.1e-05	0.0010526	0.0012343
normal weight	2	male	32	23.6678	0	0.000164	0
normal weight	2	female	51	23.7007	0	0.0019638	0.0003118
normal weight	2	male	35	23.7108	0	0	0
normal weight	2	female	49	23.7449	0	0	0
normal weight	2	male	27	23.769	0	0	4.32e-05
normal weight	2	female	47	23.77	0.0002543	0.0045167	0.0012214
normal weight	2	male	30	23.7988	0.0007282	0.0006195	0.000166
normal weight	2	male	26	23.8586	0.0002166	0.0001691	0.0002956
normal weight	2	male	29	23.8606	0	0.0001057	3.48e-05
normal weight	2	male	27	23.8804	0.0004989	0.0038759	0.0003442
normal weight	2	male	41	23.9016	0	0	0
normal weight	2	male	49	23.9469	0.0006248	0	0
normal weight	2	male	37	23.9901	0.0001217	0.0001549	0.0002555
normal weight	2	male	30	24.0005	0	0	0
normal weight	2	male	28	24.0138	0	0	0
normal weight	2	male	41	24.0941	0	6.89e-05	7.7e-06
normal weight	2	male	31	24.11	2.3e-05	0.0006034	0.0003809
normal weight	2	male	37	24.1557	2.38e-05	9.94e-05	0.0001615
normal weight	2	male	53	24.2031	0.0001247	0	0.0004881
normal weight	2	male	40	24.2412	0.0003556	0	0.0003768
normal weight	2	male	27	24.2507	0.0005535	0.0016266	0.000434
normal weight	2	female	53	24.2922	1.41e-05	0.0001252	0.000162
normal weight	2	female	47	24.3048	0.000617	0	0.001482
normal weight	2	female	42	24.3266	0.0005186	0.0003376	0.0003799
normal weight	2	male	29	24.3326	0	9.3e-05	0.0017539
normal weight	2	male	47	24.4051	0	0	0
normal weight	2	female	30	24.4103	0	6.19e-05	0.0003714
normal weight	2	male	24	24.423	0.0002356	0.0001597	0.0008874
normal weight	2	male	46	24.4796	0.003737	0.0009853	0.0006661
normal weight	2	female	30	24.5378	1.87e-05	1.86e-05	0
normal weight	2	male	54	24.5816	0	0.000349	0.0003032
normal weight	2	male	24	24.59	0	0	0
normal weight	2	male	39	24.6079	0	0.0001082	0.0002238
normal weight	2	male	34	24.6083	3.98e-05	0.0013786	0.0001034
normal weight	2	female	48	24.6778	0.001303	0.000313	0.0012826
normal weight	2	male	57	24.6832	0.00088	0.0004098	0.0007063
normal weight	2	male	46	24.6836	0.0004404	3.02e-05	0
normal weight	2	male	46	24.6857	0.0002911	0.0001062	0.0009123
normal weight	2	female	49	24.6892	0.0001777	0	0.0010722
normal weight	2	male	39	24.749	0.000197	0.0002043	0.0006175
normal weight	2	male	51	24.7662	3.2e-06	0.0420726	0
normal weight	2	female	31	24.78	2.22e-05	0.0009951	0.0023399
normal weight	2	male	25	24.7856	0	0.0001894	0.0001389
normal weight	2	male	27	24.7934	0	1.99e-05	2.68e-05
normal weight	2	male	31	24.7935	0	6.52e-05	0.0011485
normal weight	2	male	52	24.7981	0	0.0001411	0.000207
normal weight	2	male	28	24.8649	0.0005065	0.0009071	0.0008655
normal weight	2	female	47	24.9163	1.14e-05	0	0.000734
normal weight	2	male	38	24.9225	0.0002447	0	0.0010716
normal weight	2	male	55	24.9226	0	0	0
normal weight	2	female	47	24.9976	0.0011715	9.92e-05	0.0026718
obese	2	male	54	30	0.0001163	0.0003869	0.0010811
normal weight	1	female	30	30.0346	0	0	0
obese	2	male	43	30.0505	1.47e-05	0	4.61e-05
obese	2	male	29	30.0568	0	0.0001047	0.000417
obese	2	male	28	30.0596	0	0	0
obese	2	female	24	30.0838	0	0	0
obese	2	male	44	30.1038	0	0	0.0029238
normal weight	1	female	20	30.1038	0	4.49e-05	0
obese	2	female	21	30.1038	5.58e-05	0	0
obese	2	female	33	30.1103	5.63e-05	9.36e-05	0.000613
obese	2	male	31	30.116	0	0	0.0002806
obese	2	female	29	30.1162	0	0	0.0002155
obese	2	male	53	30.2065	0	0	0.0001124
obese	2	male	34	30.2121	6e-06	9.94e-05	0
obese	2	male	35	30.2132	0.00015	0	0.000659
obese	2	male	35	30.2425	5.13e-05	0.0010428	0.0002335
obese	2	male	28	30.2676	0	2.18e-05	0
obese	2	male	52	30.2694	2.8e-06	1.46e-05	1.7e-06
obese	2	male	27	30.3233	0.0019238	4.92e-05	0.0007649
obese	2	male	28	30.324	0	1.79e-05	0.0001741
obese	2	male	31	30.3308	0.0002631	0.0007839	0.0021781
obese	2	male	27	30.3465	0	0.0002227	0.0005079
obese	2	male	32	30.3623	7.7e-06	8.8e-05	1.68e-05
obese	2	female	24	30.3665	7.8e-05	9.07e-05	0.0001029
obese	2	male	32	30.3894	0	0	0
obese	2	male	37	30.3939	0.0001373	0.0007787	0.0007815
obese	2	female	19	30.407	9.41e-05	2.1e-06	0.0004473
obese	2	female	30	30.4076	0.0003101	7.09e-05	0.0004308
obese	2	female	24	30.4134	0.0001049	8.87e-05	0.001084
obese	2	male	54	30.4389	0.0001425	0.0003554	0
obese	2	female	14	30.4438	3.03e-05	0.0042009	0.0003432
obese	2	male	28	30.4583	5.08e-05	0.000101	0.00091
obese	2	female	24	30.4687	0	0.0004162	0.0003419
obese	2	female	30	30.4878	2.7e-06	0.0007143	0.000713
obese	2	male	21	30.5241	0	0	0.0004802
obese	2	male	26	30.5241	0	0	4.33e-05
obese	2	male	31	30.5247	7.33e-05	0	0.0001884
normal weight	1	female	24	30.5601	7.64e-05	0	0
obese	2	female	30	30.5768	3.01e-05	0.0003388	0.0007894
obese	2	male	26	30.5855	2.6e-06	0.0001111	0.0001134
obese	2	female	28	30.6228	0	7.7e-06	2.57e-05
obese	2	male	27	30.6303	0	0	0.0002418
obese	2	male	33	30.6781	0.0001027	0	0.0003296
obese	2	female	61	30.6953	4.5e-05	0.0001329	0.0005063
obese	2	male	15	30.7099	0	0.0002551	0.000101
obese	2	male	29	30.7145	7.39e-05	7.67e-05	0.0003069
obese	2	male	58	30.7183	0.0003268	0.0050472	0.0028982
obese	2	male	41	30.7498	0	0	0
obese	2	male	47	30.7719	0.0001257	1.15e-05	0.000159
obese	2	male	19	30.7934	0.0001356	0	0
normal weight	1	female	22	30.8012	5.36e-05	0.0002085	0.0001802
obese	2	male	30	30.8042	4.4e-06	8.93e-05	0.0003954
obese	2	male	25	30.8043	0	0	0
obese	2	female	16	30.8173	4.19e-05	4.76e-05	0.0002116
obese	2	male	26	30.8431	0.0004301	0	0.0014932
obese	2	female	16	30.8463	0	0	0
obese	2	female	26	30.863	0.0003493	0.000532	0.0030694
obese	2	male	18	30.8642	0	0	0.0002919
obese	2	male	28	30.9057	2.98e-05	0	0.0001942
normal weight	1	female	30	30.9383	0	0.0003256	0.0001548
obese	2	male	36	30.9536	6.64e-05	0.0001541	0
obese	2	female	24	30.9642	0	0	0.0003539
obese	2	male	33	31.035	1.18e-05	0	0.0001969
obese	2	female	26	31.0547	0.0001109	0.0004598	0.0003269
obese	2	male	19	31.1073	2.77e-05	0	0
obese	2	female	25	31.1309	0.0005771	0.0003187	0.001057
normal weight	1	male	24	31.1419	0	0	0
obese	2	male	36	31.1504	1.76e-05	1.25e-05	0.0007463
normal weight	1	male	27	31.1728	0	0	0
obese	2	male	25	31.1846	0	0	0
obese	2	male	28	31.2175	0.0002398	2.11e-05	0.0006457
obese	2	female	30	31.231	0	0	8.99e-05
obese	2	male	28	31.2341	0	4.96e-05	0.0001343
obese	2	female	20	31.245	0.0004284	0.0007763	0.0007472
obese	2	female	23	31.245	0	9.02e-05	0
obese	2	female	20	31.25	6.27e-05	3.87e-05	5.31e-05
normal weight	1	male	18	31.25	0.0025493	0	0
obese	2	male	24	31.2596	2.68e-05	4.25e-05	0.000263
obese	2	male	26	31.2789	0	6.68e-05	0.0001813
obese	2	male	29	31.2875	0	0	4.8e-06
obese	2	female	28	31.3058	9.29e-05	0.0003143	0
obese	2	male	27	31.3092	0	4.69e-05	0
obese	2	male	28	31.3139	0	2.31e-05	0
obese	2	male	59	31.3149	0	0	0.0008307
obese	2	female	16	31.3209	0.0001588	9.93e-05	0
obese	2	male	42	31.3349	0.0001609	2.3e-05	1.24e-05
obese	2	male	29	31.3407	7.7e-06	2.02e-05	0.0004723
obese	2	male	13	31.3536	0	0	0
obese	2	female	16	31.3798	0	0	0
obese	2	male	22	31.3841	0	2.46e-05	0.0003885
obese	2	female	35	31.39	0.0001034	0.0001438	0.0005941
obese	2	female	17	31.3906	0	0.0003372	0.0001769
obese	2	male	27	31.3973	0	0	0.0001455
obese	2	female	22	31.3977	0	0	0
obese	2	male	38	31.4012	0.0006324	0.0002391	0
obese	2	female	27	31.4052	0.0003571	0.000264	0.0005178
obese	2	male	18	31.4114	0.0003505	4.02e-05	0.0005249
obese	2	female	23	31.4272	0.0018915	0.0006846	0
obese	2	female	18	31.4453	6.23e-05	0	0
obese	2	male	40	31.5228	0	0	0
obese	2	female	32	31.5537	0	0.0001122	0.0009407
normal weight	1	male	19	31.5617	7.9e-06	0.0059132	0.0013716
obese	2	female	24	31.5721	0.0013307	0.000991	0.0047252
obese	2	female	29	31.5886	0	0	0.0004281
obese	2	male	58	31.5917	6.61e-05	0.0001114	0.0016722
obese	2	female	30	31.6032	0	0.000288	0.0001486
obese	2	female	17	31.6158	0.0004577	0.0001362	8.94e-05
obese	2	male	24	31.6283	0	0	0
obese	2	female	36	31.6283	4.73e-05	0.0002306	0.0001264
obese	2	male	32	31.639	0	0	4.84e-05
obese	2	male	29	31.6408	0.0004602	2.71e-05	0.0002856
obese	2	female	19	31.6443	0.0001082	0.0005562	0.0008054
obese	2	male	26	31.6828	0	3.43e-05	0
obese	2	male	38	31.7284	0.0015731	0.0001586	0.001351
obese	2	male	32	31.7342	2.2e-06	0.0002447	0.0002718
obese	2	male	20	31.7451	0	1.49e-05	0
obese	2	male	30	31.7502	0	0	0.0001418
obese	2	female	18	31.7889	0.0001531	0.000158	0.0004941
obese	2	male	42	31.7901	0	0	0
obese	2	male	43	31.7956	0	1.28e-05	8.04e-05
obese	2	female	23	31.8168	8.44e-05	0.0003864	0.0004842
obese	2	female	19	31.8405	0	0	0
obese	2	female	19	31.8421	0.0015439	0	0.0004152
obese	2	female	24	31.8878	1.34e-05	0	0.0002498
obese	2	female	32	31.9192	0	0.0003061	0.000262
obese	2	female	25	31.935	0.0002238	0	0.000355
obese	2	male	35	31.9367	0	0	0
obese	2	male	24	31.9377	0.0008536	0.0002079	0.0011177
obese	2	male	29	31.9453	5.17e-05	0.0001142	0.0005039
obese	2	female	26	31.9545	0.0006744	0.0006248	0.0015863
obese	2	male	34	31.9552	0	0	1.9e-05
obese	2	female	16	31.9559	0	0	0
obese	2	male	26	31.9723	0	0	2.09e-05
obese	2	female	23	31.975	0	0	0.0004902
obese	2	female	21	31.9922	0.0011054	0.0010273	0.0007183
obese	2	male	36	32.0156	0.0001294	7.32e-05	0.0002911
obese	2	male	26	32.0248	0.0001113	0.000783	0.0010485
obese	2	male	29	32.0269	0	2.13e-05	8.27e-05
obese	2	female	17	32.0478	0	0	0
obese	2	female	23	32.0703	0.000166	0.0001671	0.000938
normal weight	1	male	25	32.0759	1.87e-05	0	0.0016157
obese	2	male	26	32.0759	0.0001459	0.0001723	0.0002217
obese	2	male	17	32.0894	2.64e-05	0.0003527	5.62e-05
obese	2	male	22	32.112	2.2e-06	5.27e-05	0.0001683
obese	2	female	21	32.112	0	0	0.0004264
obese	2	female	28	32.1157	0	0	0
obese	2	female	35	32.1274	0	2.19e-05	0.0004946
obese	2	male	18	32.13	0	5.2e-05	0
obese	2	male	30	32.1419	0.0001359	0.0003734	0.0003444
obese	2	male	17	32.1466	6.84e-05	2.7e-05	0
obese	2	female	28	32.1597	0	0.0001468	0
normal weight	1	female	27	32.1609	0	0.0006454	5.21e-05
obese	2	female	17	32.1747	0.0001793	0.0006769	0.000702
obese	2	female	25	32.1796	0	6.4e-06	0
obese	2	male	17	32.1862	0.0001826	0.0019483	0
obese	2	male	43	32.1914	0	0	0
normal weight	1	female	27	32.1978	0	0	0
normal weight	1	male	30	32.2037	0	0.0004245	0
obese	2	male	35	32.2185	1.1e-05	0.0001197	0
obese	2	female	27	32.2266	3.41e-05	0.0001619	0.0003622
obese	2	male	40	32.2315	0	0.0002615	0.000249
obese	2	female	24	32.2464	1.15e-05	1.12e-05	0
obese	2	male	28	32.2499	0	0	0
obese	2	female	30	32.2518	0	0	0
obese	2	male	29	32.2582	0	3.25e-05	0
obese	2	male	34	32.264	7.8e-05	0.0005333	0.0011534
obese	2	male	40	32.264	0	7.15e-05	8.87e-05
obese	2	female	24	32.2656	0	0	0
obese	2	female	25	32.2818	2.6e-06	0	0.0013258
normal weight	1	male	24	32.2831	0	0	0
obese	2	male	30	32.2831	0.0001687	0.0004459	0.0009994
normal weight	1	female	20	32.2837	1.46e-05	0.0042233	0
obese	2	female	15	32.2865	0.0004623	0	0
obese	2	male	41	32.2932	4.48e-05	7.65e-05	0.0008673
normal weight	1	female	18	32.2933	0.0008834	0.0007713	0
obese	2	female	17	32.3563	2.21e-05	0	0.000759
obese	2	male	29	32.3592	1.03e-05	0	0
obese	2	male	33	32.3689	0	0.0002816	2.46e-05
obese	2	female	15	32.3832	4.5e-05	9.62e-05	0
obese	2	female	27	32.3884	2.07e-05	8.43e-05	0
obese	2	female	35	32.3884	9.75e-05	0.0021017	0
obese	2	male	25	32.3934	0	0	2.53e-05
obese	2	female	16	32.3959	0	0.000915	0.0005717
obese	2	male	26	32.3967	0.0001416	0	0.0003792
obese	2	male	15	32.4166	0	0	0
obese	2	female	25	32.4219	0	6.78e-05	7.1e-06
obese	2	male	16	32.45	0.0035607	0	0
obese	2	female	15	32.4544	2.98e-05	0	0
obese	2	female	20	32.4815	0	6.77e-05	0
obese	2	male	28	32.4859	0.0001352	7.59e-05	0.0006863
obese	2	female	18	32.501	0	0	0
obese	2	female	34	32.5069	0	7.78e-05	0
obese	2	male	40	32.526	0	0	0
obese	2	female	17	32.526	7.97e-05	0.0001001	0
obese	2	male	22	32.5736	0	0	0.0002711
obese	2	male	30	32.5741	0	0	0
obese	2	female	18	32.5781	0	0	0.0002239
obese	2	female	28	32.6294	3.5e-06	0.0001251	0.0004824
obese	2	male	43	32.6411	0	0	0
obese	2	female	38	32.647	0	0	0
obese	2	female	38	32.6669	0.0001396	0.0001308	0
obese	2	male	27	32.7103	0	0	0
obese	2	female	27	32.7159	0	0	0
obese	2	male	29	32.7554	0	4.1e-05	0.0001692
obese	2	female	16	32.7558	0	5.77e-05	0
obese	2	female	23	32.7735	0	0.0001972	0.0003154
obese	2	female	32	32.7802	0	0.000208	5.26e-05
obese	2	female	21	32.7826	0	0	0.0009317
obese	2	female	15	32.8086	0.0002755	0.0001739	0.0014635
obese	2	female	23	32.8208	0	6.07e-05	0
obese	2	male	33	32.8646	0	2.18e-05	1.18e-05
obese	2	male	30	32.8648	0	4.79e-05	6.71e-05
normal weight	1	female	19	32.872	0.0003552	0.0142471	0.0002009
obese	2	female	18	32.9287	0.0028145	1.7e-06	0.0012252
obese	2	female	26	32.9287	0.0001515	0.0004171	0.0003848
normal weight	1	female	19	32.9331	0	0	0
obese	2	male	27	32.9469	6.4e-06	6.95e-05	5.12e-05
obese	2	male	40	32.9758	0.0001485	0.0004194	0.0011448
normal weight	1	female	19	33.0215	0	7.84e-05	2.84e-05
obese	2	male	31	33.0271	0	0	0
obese	2	female	30	33.0476	0.0002264	0	0.0004644
obese	2	female	31	33.0489	0	2.09e-05	2.89e-05
normal weight	1	female	27	33.0742	5.16e-05	0.0035972	0
obese	2	female	19	33.1079	8.46e-05	0	0
obese	2	male	40	33.1173	0	6.98e-05	0.0001844
obese	2	female	23	33.1313	0	0.0001927	0.0011103
obese	2	male	26	33.1398	0	0	0
normal weight	1	female	26	33.1589	0	0.0001977	0
obese	2	female	18	33.1589	0.0003929	0.0004265	0.00083
obese	2	male	30	33.1598	0	0	0.0001152
obese	2	male	16	33.1726	0.0004949	0.0001304	0.0008323
obese	2	male	30	33.1726	0.0001355	0	0.000378
obese	2	female	30	33.2163	2.14e-05	0	0.0004237
obese	2	male	31	33.2408	5.32e-05	1.33e-05	0.0008987
obese	2	female	32	33.2415	0	0	0
obese	2	male	22	33.2453	0.000173	0.0002682	0.0004209
normal weight	1	female	25	33.2647	0.0001072	0.001375	0.000174
obese	2	male	30	33.2838	0	3.98e-05	0.0002018
obese	2	female	24	33.2937	0	6.41e-05	0.0001899
obese	2	male	29	33.3013	0	0	0
obese	2	female	26	33.3203	0	0	0
normal weight	1	male	26	33.3218	3.34e-05	0.000194	0.0013869
obese	2	male	14	33.3598	4.48e-05	0	0.000275
obese	2	female	15	33.454	0	0	0
obese	2	female	23	33.4619	0	0.001935	0
obese	2	male	28	33.5299	0	0	0
obese	2	male	27	33.5461	0	1.8e-06	0
obese	2	male	27	33.5501	0	0.0001624	0.0005543
obese	2	female	28	33.6084	0.0002819	0	0
obese	2	male	26	33.6091	2.98e-05	0.000113	0.0002613
obese	2	female	29	33.6109	0	0.0003205	0
obese	2	male	35	33.626	0	0	0
normal weight	1	female	24	33.6298	0	0.0008731	0.0004999
obese	2	male	28	33.648	2.93e-05	0.0002016	0.0002396
obese	2	female	27	33.6485	0	0	4.9e-06
obese	2	female	19	33.6593	3.46e-05	0.0002669	0.0008899
obese	2	female	20	33.6593	0	4.87e-05	0.0005575
obese	2	male	14	33.7132	0.0001067	0	0
obese	2	female	18	33.737	0	0	1.17e-05
obese	2	male	27	33.7394	0	0	0.0002557
obese	2	male	29	33.7473	0.000133	0.0002314	0.0001847
obese	2	female	26	33.75	0	0	0
obese	2	female	25	33.7601	0	0	0
normal weight	1	female	21	33.7686	0.0001241	0.0046697	0.0001177
normal weight	1	male	30	33.771	0	0	0
obese	2	female	32	33.7981	0	0.0001332	9.56e-05
obese	2	male	40	33.8359	0	0	0
obese	2	male	26	33.8525	6.3e-06	0.0006153	0.0006684
obese	2	male	26	33.8612	0.0001644	0	0.0005339
obese	2	male	33	33.8752	8.3e-06	0	0
obese	2	male	29	33.8913	0	6.26e-05	0.0013687
obese	2	female	40	33.9493	0.0005762	0.0009388	0.0001156
obese	2	female	16	33.9844	0.0011871	0.0010224	0.0014858
obese	2	male	29	33.9877	0	0	0
obese	2	male	29	33.9877	0	0	0
obese	2	male	29	34.0387	1.64e-05	0.002984	0.0004616
obese	2	male	17	34.041	0.0002473	0	9.43e-05
obese	2	male	29	34.0674	0.000149	7.77e-05	0
normal weight	1	male	20	34.0807	0	0	0.0005366
obese	2	male	24	34.0807	0.0013421	5.54e-05	0
obese	2	male	16	34.0813	1.26e-05	9.8e-05	0.0003038
obese	2	female	15	34.1036	0.0009798	0.0004319	0.0011174
normal weight	1	female	19	34.1411	3.21e-05	0.0021708	0.00029
obese	2	male	27	34.1503	0	0	0.0002651
obese	2	female	22	34.1542	0	0	2.72e-05
obese	2	male	27	34.2129	3.13e-05	0	0
obese	2	female	28	34.2504	6.29e-05	0	7.3e-06
obese	2	male	29	34.2786	0	4.67e-05	0
obese	2	male	24	34.2857	0	0.0004341	7.19e-05
obese	2	female	17	34.2936	0	0.0003161	0.0001036
normal weight	1	male	26	34.3125	0	6.05e-05	0
normal weight	1	female	28	34.3257	0.0001359	0.0003936	0.0004383
obese	2	male	28	34.3354	2.52e-05	0	0.0002533
obese	2	male	36	34.3505	0	0	0
obese	2	female	25	34.3679	0.0002673	0.0005336	0.0003819
obese	2	male	29	34.3748	0	0	0
obese	2	male	22	34.3901	7.6e-06	0	0.0002349
normal weight	1	male	18	34.4022	0	0.0015388	0.000402
obese	2	female	41	34.4165	0.0003657	0.0002624	0.0001236
obese	2	male	16	34.4559	0	0.0004258	0.0001875
obese	2	male	28	34.5124	0	0	0
obese	2	male	23	34.5679	0	0.0003711	1.42e-05
obese	2	female	31	34.5714	0	0	0
obese	2	female	18	34.5926	0	7.56e-05	0.0001576
obese	2	female	18	34.5977	0	0	0.0009518
obese	2	male	25	34.6005	0.0009325	0	0.0011278
normal weight	1	female	21	34.6021	0	0	0
obese	2	female	17	34.6567	3.06e-05	0	0
obese	2	male	27	34.6593	0	0	0
obese	2	male	32	34.6758	0	0.0001846	4.83e-05
obese	2	male	27	34.6805	0.0001343	0.0003728	9.96e-05
obese	2	female	39	34.6892	3.32e-05	0	0.0005153
normal weight	1	male	19	34.7178	0.0029339	0	0.0004781
obese	2	male	23	34.718	2.58e-05	7.95e-05	0
obese	2	male	24	34.7494	0	2.41e-05	0
obese	2	male	33	34.7494	0.0001033	3.4e-06	0.0004621
obese	2	male	21	34.7701	0	0	0
obese	2	male	31	34.784	0	0.0001477	0
obese	2	female	39	34.8082	0.0001411	1.53e-05	0.0004244
normal weight	1	female	27	34.815	0	0.0037984	0
obese	2	female	26	34.8157	0	4.07e-05	0.0019433
obese	2	male	20	34.8161	0	2.33e-05	0
obese	2	female	16	34.8209	5.54e-05	0	0.0001235
obese	2	male	30	34.8261	0	0	8.32e-05
obese	2	male	15	34.8756	0	0.0002553	7.97e-05
obese	2	male	23	34.8932	0	0	0
normal weight	1	female	18	34.8944	0	0	0.0001309
obese	2	female	23	34.8944	6.12e-05	0.00012	0
normal weight	1	male	28	34.8994	0	0.0001155	0.0005977
obese	2	male	29	34.9074	0	0.0001231	0.000139
obese	2	female	27	34.9274	0.0001863	0	0
obese	2	male	17	34.9516	0	0	7.6e-05
obese	2	female	16	34.9702	1.59e-05	0.0001562	4.25e-05
obese	2	female	32	34.9959	0	0.0017107	0.0001495
obese	2	male	23	34.9966	3.64e-05	4.7e-05	9.59e-05
normal weight	1	female	30	35.0032	0	0	0
obese	2	female	28	35.0293	0.0010775	0	0
obese	2	female	29	35.0505	0	5.13e-05	0
obese	2	male	41	35.0676	7.44e-05	8.17e-05	0.0005119
obese	2	female	19	35.0781	0	0.0002251	0.0013986
obese	2	male	36	35.0803	0.0012349	0	0.0001147
normal weight	1	female	22	35.0818	0	0	0.0001856
normal weight	1	male	23	35.1489	0.0002464	8.65e-05	7.2e-06
obese	2	female	16	35.1838	1.66e-05	0	0.0010447
obese	2	female	41	35.201	7.81e-05	4.33e-05	0.0005978
obese	2	female	16	35.2249	0	0	0
obese	2	male	23	35.2355	0	0	0
obese	2	female	28	35.2537	0.0113291	0.0015211	0
obese	2	female	36	35.2617	2.23e-05	0	0.0002109
normal weight	1	male	19	35.2653	8.65e-05	0.0033424	0.0048591
obese	2	female	26	35.2734	0.002359	0	0
normal weight	1	male	22	35.2859	0	0	0
obese	2	female	14	35.2941	9.44e-05	5.46e-05	0.0002022
obese	2	female	23	35.2984	0	0	0.0002436
obese	2	female	23	35.3629	0	0	0.0003474
obese	2	female	28	35.3666	0	0.0003097	2.22e-05
obese	2	female	35	35.3796	0	2.26e-05	0.0006963
normal weight	1	female	21	35.4308	0	0.0010073	0
obese	2	male	27	35.463	0	0	0
obese	2	male	16	35.4671	3.32e-05	8.6e-06	0.0001033
obese	2	male	19	35.4938	0.0003056	7.3e-06	0.0007309
normal weight	1	female	24	35.4979	0	2.41e-05	0.0001063
obese	2	female	26	35.5017	0	0.0001755	0.0002168
obese	2	male	27	35.5436	0	5.6e-06	4.69e-05
obese	2	male	20	35.5665	0.003134	0	0.0008823
obese	2	female	20	35.5879	0.0001524	0.0002998	0.0005109
obese	2	female	20	35.608	0	0	3.96e-05
obese	2	female	29	35.629	5.06e-05	0.0017973	0.0046923
obese	2	male	28	35.6521	3.4e-06	0	0
obese	2	male	15	35.6805	0.0001443	9.84e-05	0.000361
normal weight	1	female	21	35.7031	0	0	0
obese	2	female	17	35.7093	0	0	0
obese	2	male	27	35.7132	0	0	0.0001288
obese	2	male	38	35.7224	0.0044607	0	0.0002952
obese	2	male	29	35.7236	0	0	0
obese	2	male	28	35.7439	0.0007658	0.0003459	0.0020991
normal weight	1	female	28	35.7495	2.91e-05	0.0025918	5.63e-05
obese	2	male	26	35.7878	8.96e-05	0	1.75e-05
normal weight	1	female	22	35.7936	0	0.0001493	0
obese	2	female	24	35.8046	2.59e-05	0	0.0017262
obese	2	female	17	35.8177	1.76e-05	2.53e-05	0.0008412
obese	2	male	31	35.8225	6.48e-05	5.13e-05	0.0002271
obese	2	female	22	35.8836	7.72e-05	8.96e-05	2.71e-05
obese	2	male	29	35.9034	0	0	0
obese	2	male	29	35.9231	0	0.0001553	0.0002592
obese	2	female	28	35.9441	0	0.0009194	0.0011662
obese	2	male	18	35.9568	0	0.0009808	0.001714
obese	2	male	24	35.978	2.19e-05	0	0
obese	2	male	20	35.9977	7.89e-05	0.0006004	0.0013208
obese	2	male	27	36.0021	0	0.0002886	0.0001587
obese	2	male	33	36.0167	0	0	0
obese	2	male	18	36.049	0	0	0.0001135
obese	2	male	28	36.0536	0	0	0
obese	2	female	28	36.0711	0	0	3.95e-05
normal weight	1	male	22	36.2382	0.0001389	0	0.0003623
obese	2	female	29	36.2505	0	0.0004856	0.0004272
obese	2	female	33	36.2507	0	0	7.56e-05
obese	2	female	32	36.2539	0	8.2e-05	0
obese	2	male	21	36.266	0	0.0024829	0.0011478
obese	2	male	33	36.266	2.73e-05	3.59e-05	0.0002552
normal weight	1	female	28	36.2897	0	0.0002622	0
obese	2	female	36	36.3281	8.8e-06	0	0.0007025
obese	2	male	28	36.3322	0.0099644	0.0004355	0.0036984
obese	2	male	30	36.3322	0.0015298	0	0.0036776
obese	2	male	33	36.3324	6.13e-05	0	6.25e-05
normal weight	1	female	25	36.3636	0	0	0
obese	2	female	22	36.3636	0	0	0
obese	2	male	24	36.3785	2.62e-05	3.2e-06	5.35e-05
obese	2	female	29	36.4195	0.0003197	7.35e-05	4.77e-05
obese	2	male	29	36.4418	0	0	0
normal weight	1	male	21	36.4853	0	0	0.0002802
obese	2	female	37	36.5036	0.000279	0.0001077	0.002806
obese	2	male	17	36.523	3.22e-05	0	0
obese	2	male	34	36.5241	0	4.93e-05	0
normal weight	1	female	27	36.5326	0	0.000155	0
obese	2	female	32	36.5398	0	0.0001176	0
obese	2	male	23	36.5744	0.0004802	0.0004482	0.0003721
obese	2	male	24	36.6406	2.19e-05	5.83e-05	0.0001066
normal weight	1	female	28	36.6498	0	0.0004865	0
obese	2	male	39	36.69	0	0	0.0022795
normal weight	1	male	22	36.702	0	0.0005809	0.0002238
obese	2	male	20	36.7105	0.0002978	0.0004886	0.0005146
obese	2	female	15	36.7187	1.58e-05	8.61e-05	0
obese	2	male	16	36.7288	2.77e-05	0.000334	0.0012459
obese	2	female	29	36.7537	0	0.0003553	0.0001388
obese	2	male	19	36.7734	7.74e-05	0.0007469	0.0005739
obese	2	female	31	36.7796	0	8.58e-05	0.0008419
normal weight	1	female	21	36.8084	0.0035247	0.0029314	0.0014304
obese	2	male	21	36.8104	0	0	0
normal weight	1	female	18	36.8456	2.21e-05	3.96e-05	0.0001231
normal weight	1	male	20	36.898	0.0001089	0.0006627	0.0009559
obese	2	male	33	36.9272	0.0001564	0.0003962	0.0006255
obese	2	female	19	36.9321	0	0	0.0007662
obese	2	male	29	36.943	0	0.0001736	0
obese	2	female	23	36.9541	0	0	0
obese	2	male	35	36.9686	2.85e-05	0.0001643	0.0003096
obese	2	male	20	37.0242	0.0002825	0	0.0001559
obese	2	female	23	37.0983	0.0003865	0.0004393	0.0007959
obese	2	male	36	37.1546	0	0	7.28e-05
obese	2	female	32	37.1802	0.0004544	0	0
normal weight	1	male	29	37.1823	0.000175	0	0.0001126
obese	2	male	19	37.1823	0.0006515	0	0.002249
obese	2	female	19	37.1901	0	0.0001543	0.0006154
obese	2	male	30	37.1924	0	0	0
obese	2	female	17	37.2245	0	3.21e-05	0
obese	2	female	21	37.2333	0	0.0002826	0.0004701
obese	2	male	23	37.2837	7.33e-05	0.000182	0.0009509
obese	2	male	29	37.3087	0	0	8.06e-05
normal weight	1	male	20	37.3233	0.0002908	0.0005304	0
obese	2	male	33	37.3257	0	0	0
normal weight	1	female	28	37.3356	0	0.0002398	0
obese	2	female	39	37.3403	0.0002201	1.23e-05	0
obese	2	male	32	37.369	7.28e-05	0	8.83e-05
obese	2	male	29	37.392	0	0	3.91e-05
obese	2	female	20	37.3921	3.31e-05	2.13e-05	0.0005415
obese	2	female	31	37.4194	0	0	0
obese	2	male	31	37.4334	0	0.0003437	0.0001553
obese	2	female	29	37.4637	0	0	0
obese	2	male	20	37.4816	5.3e-06	0	0
obese	2	female	14	37.4858	0	1.36e-05	7.41e-05
obese	2	female	17	37.5	0	0.0003637	0.0004076
normal weight	1	male	22	37.5433	0	0	0
obese	2	female	29	37.5521	0.0011923	0.0002166	0.0007263
obese	2	female	31	37.5567	7.47e-05	0.0001164	0.0004233
obese	2	female	23	37.5626	0	1.7e-06	0.0001367
normal weight	1	female	19	37.5776	0	0.0061659	0.0002039
obese	2	female	18	37.5781	6.79e-05	0.0005206	0.0012896
normal weight	1	male	24	37.5849	0	0.0014599	0
obese	2	female	19	37.6184	0	0	0
obese	2	female	30	37.7413	5.34e-05	0.0002441	0.0004365
obese	2	female	28	37.7509	1.82e-05	0.0003115	0.0002421
obese	2	male	33	37.756	0.0013968	0.0006753	0.0009629
obese	2	female	30	37.8041	3.93e-05	1.3e-06	0.0007829
obese	2	male	31	37.8138	0	1.43e-05	0
obese	2	female	33	37.8516	0	0	0
obese	2	female	32	37.8696	0	0	0
obese	2	male	32	37.9056	5.14e-05	0	2.04e-05
obese	2	male	33	37.9649	0	0	0
normal weight	1	female	19	37.9982	0.0015734	0.0033148	0.0012079
obese	2	female	21	38.0001	0.0001418	0.0001364	0.0003866
obese	2	female	19	38.0142	1.75e-05	1.02e-05	0.0010122
obese	2	female	24	38.0548	0	0	2.4e-05
obese	2	male	18	38.0735	0	0	0.0015069
obese	2	male	20	38.0735	0	0	0
obese	2	male	28	38.0816	0	0	8.6e-06
obese	2	male	26	38.094	0	0.0001165	2.24e-05
obese	2	male	17	38.1714	0	0	0
normal weight	1	male	29	38.1916	0	0.0004891	0
obese	2	male	19	38.2665	1.64e-05	0.0005281	0.0004255
normal weight	1	male	18	38.3259	0	0	0.0006084
obese	2	male	13	38.4468	0	8.85e-05	0.0002409
obese	2	male	17	38.4577	0	0	0
obese	2	male	32	38.4653	0	8e-06	0.0001272
obese	2	male	19	38.5306	0	0	0.0004461
obese	2	female	20	38.5343	0.0001648	0.0001474	0
obese	2	male	16	38.5788	4.27e-05	0	0
obese	2	male	30	38.6196	1e-05	0	7.09e-05
obese	2	female	13	38.641	0	0.0001125	0.0001447
obese	2	male	24	38.6505	0	2.13e-05	1.61e-05
obese	2	male	30	38.6543	8.75e-05	0	0.0002252
normal weight	1	female	27	38.6667	0.00012	0.0013838	0.0001375
obese	2	male	27	38.7197	0	3.3e-06	0.0002267
obese	2	female	16	38.8434	0	0	0
obese	2	male	35	38.8571	0.0001045	0.0004334	0.0006993
obese	2	male	25	38.9589	0.0001588	0.0003871	0.0004399
obese	2	male	27	38.9752	0	0	0.0002541
obese	2	male	32	38.9979	0	0	0
normal weight	1	female	24	39.0368	0	0.0004395	0
obese	2	male	16	39.1003	0	0	0
obese	2	male	33	39.1173	5.38e-05	2.48e-05	4.54e-05
normal weight	1	female	23	39.1929	0	0	0
obese	2	female	35	39.2187	0	0.0013892	0
obese	2	male	24	39.2239	0	0	0
obese	2	male	21	39.2262	0	0	0
obese	2	female	15	39.3739	9.9e-05	0	0.0001123
obese	2	female	17	39.4111	0	0.0001711	6.31e-05
obese	2	female	18	39.4244	3.75e-05	0.0001326	0.000569
obese	2	male	22	39.4464	9.75e-05	7.33e-05	0.000363
obese	2	male	27	39.4702	0	0	0
obese	2	male	34	39.5637	8.85e-05	0	0
obese	2	female	25	39.5921	0	0	0.0008813
obese	2	female	26	39.6703	0	2.15e-05	0.0007273
obese	2	male	29	39.6825	0	0	9.3e-05
obese	2	male	18	39.7145	0	0	0
normal weight	1	female	24	39.7232	0	0	0
obese	2	male	26	39.736	0	0	8.48e-05
obese	2	female	32	39.7361	0	0	0
obese	2	male	34	39.8041	1.75e-05	0.0001522	0.0011343
normal weight	1	female	24	39.8567	0	0	0.0004282
obese	2	female	29	39.8828	0.0002323	0.0004292	0
obese	2	female	17	39.9338	0.000141	0	0.0011592
obese	2	female	17	39.9654	0.0003583	0.0012566	0.0035295
obese	2	male	25	40	0	4.6e-06	0.0002621
obese	2	female	36	40	0.0001215	0.0001401	0.0003072
normal weight	1	male	26	40.0131	0.0002769	0	0
obese	2	male	26	40.0131	5.23e-05	0	0
obese	2	male	20	40.0224	0	0	0.0022663
obese	2	female	22	40.0896	1.41e-05	0.0001675	9.48e-05
normal weight	1	male	18	40.0949	0	0.0001406	0
obese	2	female	26	40.1172	0.0001422	0.0002224	0.0018534
normal weight	1	male	25	40.1617	0.009679	0.0001316	0.0012716
obese	2	male	50	40.178	0.0005344	0.0018438	0.0006906
obese	2	male	17	40.216	2.57e-05	0	7.38e-05
normal weight	1	female	25	40.3259	0	0.0007917	0.0004798
normal weight	1	male	23	40.3849	0	5e-06	6.3e-06
obese	2	male	29	40.3858	0	0	0
normal weight	1	female	29	40.3893	0	0.0014247	8.12e-05
obese	2	female	25	40.3989	0	0	0
obese	2	female	30	40.404	5.59e-05	0	0
normal weight	1	female	30	40.4583	0	0	0
obese	2	male	17	40.5178	0	0	0
normal weight	1	male	29	40.6646	0	0.0020438	0
obese	2	male	16	40.7424	0.0001091	0.0001229	0.0002428
obese	2	male	18	40.7899	0	0	0
normal weight	1	female	18	40.7908	0	0	0
obese	2	female	21	40.8081	0	0	0
obese	2	male	18	40.8163	0	0	0.0002427
obese	2	female	28	40.8588	0	4.3e-06	2.2e-05
normal weight	1	male	18	40.8704	0	0	0
obese	2	female	26	40.8968	0	0.000503	0.0003819
obese	2	female	26	40.9123	0	0.00012	0.0001311
normal weight	1	female	20	40.9565	0	0.0012411	0.0003475
normal weight	1	female	23	41.07	0	0	0
obese	2	female	23	41.2349	0	0	0.000547
obese	2	male	19	41.2692	0	0	0
normal weight	1	female	25	41.2968	0	0	0
obese	2	male	32	41.3312	0	0.0003034	0.0002057
obese	2	female	21	41.4016	0	0	0.000692
obese	2	male	22	41.4464	0.0001293	0	0
obese	2	male	31	41.6195	6.7e-06	2.52e-05	0.0001171
obese	2	male	29	41.6441	0	0	0
normal weight	1	male	19	41.6654	0	0	0
obese	2	male	21	41.7823	0.0001385	0	2.25e-05
obese	2	female	24	41.8445	0	1.35e-05	0.0002534
obese	2	male	17	41.9879	0.0002107	0	0.0009008
obese	2	male	16	42.0648	0	0.0002504	3.14e-05
obese	2	male	27	42.284	3.93e-05	0	0.0002249
obese	2	female	33	42.5012	0.0003295	0.0004515	0.0005283
obese	2	female	25	42.7181	0	1.92e-05	6.18e-05
obese	2	female	18	42.719	0.0001511	0.0001226	0.0005293
obese	2	male	37	42.9388	0	0	0
obese	2	female	16	42.9687	5.42e-05	0.0004738	9.99e-05
normal weight	1	female	27	42.9752	0	0	0
obese	2	male	20	43.1239	0	0	7.43e-05
obese	2	female	26	43.146	0	0	0
obese	2	female	18	43.1711	0	0	0
obese	2	female	32	43.2666	5.01e-05	0.0002326	0.0001216
obese	2	female	25	43.2882	0.0004178	0.0008457	0.0007035
obese	2	male	20	43.2978	0	0	0
obese	2	male	40	43.3239	0	0	0
obese	2	male	20	43.4103	0	0	6.15e-05
obese	2	female	26	43.4158	3.46e-05	0.0004113	0.0006134
obese	2	female	27	43.8857	0	0	4.08e-05
normal weight	1	male	25	43.889	1.7e-05	0.0011437	7.6e-06
obese	2	female	37	43.8935	0	0	9.57e-05
normal weight	1	female	21	43.9267	0.0018283	0	0.0004351
obese	2	female	33	44.0771	0.0011998	0.0028938	0.0042825
obese	2	female	25	44.0811	0	0	3.4e-05
obese	2	male	28	44.0816	0	0.0002441	0.0006823
obese	2	male	16	44.3586	4.47e-05	0	0.0004008
obese	2	male	25	44.5221	7.29e-05	1.06e-05	3.02e-05
normal weight	1	male	29	44.6187	0	0	4.91e-05
obese	2	male	28	44.6806	0.0001326	0.0008729	0.0011488
obese	2	male	19	44.9827	2.74e-05	0	0
obese	2	male	22	45.0167	0	0.0002464	0.001075
obese	2	male	26	45.2545	0	0.0001903	0
obese	2	female	31	45.3694	0	0	0
obese	2	male	27	45.5807	0	3.75e-05	0
obese	2	male	26	45.7143	0	0	0.0007911
normal weight	1	female	24	45.7267	6.47e-05	0.0014146	0.0001009
obese	2	male	24	45.756	4.58e-05	0.0001187	0.0005204
obese	2	male	32	45.8694	2.2e-05	0	0
normal weight	1	female	22	45.9137	0	0.0006519	0
obese	2	female	15	45.944	0	0	0
normal weight	1	female	23	47.6545	0.0015344	0.0009838	0.0002595
normal weight	1	female	30	47.666	0.0001661	0.0015854	5.25e-05
obese	2	female	18	47.6891	0	0	0
normal weight	1	male	23	48.5482	0	5.76e-05	0.0001425
obese	2	female	26	48.8458	0	0	1.22e-05
normal weight	1	female	25	48.9292	0	0	9.81e-05
obese	2	female	55	49.3446	0	0.0002599	0
obese	2	male	25	50.2127	7.01e-05	8.11e-05	0.000111
obese	2	male	19	50.6122	0	5.6e-06	5.87e-05
obese	2	male	47	50.9735	1.25e-05	0.0002019	0.0022626
obese	2	female	33	51.1111	0.0279545	0	0
obese	2	male	21	51.7993	0.0001643	0	0.0002574
obese	2	female	46	52.5439	0	0	0
normal weight	1	male	29	53.1463	0	0	0.0001617
obese	2	female	29	53.4188	0.0003284	0.0019231	0.0018827
obese	2	male	31	55.8198	0	0.0001667	0
obese	2	female	27	62.5	0	0	0

## Sheet: Supplementary Table 3
Supplementary Table 3. Isolates from the cecal content of AIDA-depleted mice.
Isolate ID	medium	Closest species by NCBI BLAST		NCBI BLAST identity %	OTU209 identity %	OTU68 identity %	Species annotation
0165_31623062803159_(1-83)	YCFAN	Anaerotruncus	colihominis	98.535		0.9929	LDE-1
0001_31623071100481_(A)	YCFAN	Anaerotruncus	colihominis	98.462		0.9929	LDE-1
0003_31623071100482_(B)	YCFAN	Anaerotruncus	colihominis	98.388		0.9929	LDE-1
0097_31623070601281_(1-1-49)	GAM	Eisenbergiella	massiliensis	88.772	0.9553		Lachnospiraceae nov.sp.
0061_31623062803107_(1-31)	GAM	Eisenbergiella	massiliensis	88.706	0.9553		Lachnospiraceae nov.sp.
0051_31623070601258_(1-1-26)	GAM	Eisenbergiella	massiliensis	88.685	0.9553		Lachnospiraceae nov.sp.
0019_31623070601242_(1-1-10)	GAM	Eisenbergiella	massiliensis	88.645	0.9553		Lachnospiraceae nov.sp.
0071_31623070601268_(1-1-36)	GAM	Eisenbergiella	massiliensis	88.636	0.9553		Lachnospiraceae nov.sp.
0057_31623070601261_(1-1-29)	GAM	Eisenbergiella	massiliensis	88.603	0.9553		Lachnospiraceae nov.sp.
0087_31623070601276_(1-1-44)	GAM	Eisenbergiella	massiliensis	88.555	0.9553		Lachnospiraceae nov.sp.
0031_31623070601248_(1-1-16)	GAM	Eisenbergiella	massiliensis	87.017	0.9862		Lachnospiraceae nov.sp.
0043_31623071300582_(C1-22)	GAM	Eisenbergiella	massiliensis	87.418	0.9884		LDE-2
0147_31623070601306_(1-1-74)	GAM	Eisenbergiella	massiliensis	87.583	0.9906		LDE-2
0145_31623070601305_(1-1-73)	GAM	Eisenbergiella	massiliensis	86.969	0.9906		LDE-2
0019_31623071300570_(C1-10)	GAM	Eisenbergiella	massiliensis	88.076	0.9907		LDE-2
0021_31623071300571_(C1-11)	GAM	Eisenbergiella	massiliensis	88.018	0.9907		LDE-2
0007_31623071300564_(C1-4)	GAM	Eisenbergiella	massiliensis	87.91	0.9907		LDE-2
0033_31623071300577_(C1-17)	GAM	Eisenbergiella	massiliensis	87.721	0.9907		LDE-2
0047_31623071300584_(C1-24)	GAM	Eisenbergiella	massiliensis	87.628	0.9907		LDE-2
0039_31623071300580_(C1-20)	GAM	Eisenbergiella	massiliensis	86.755	0.9907		LDE-2
0149_31623070601307_(1-1-75)	GAM	Eisenbergiella	massiliensis	86.648	0.9907		LDE-2
0009_31623071100485_(E)	GAM	Eisenbergiella	tayi	88.913	0.9929		LDE-2
0011_31623071300566_(C1-6)	GAM	Eisenbergiella	tayi	88.701	0.9929		LDE-2
0013_31623071300567_(C1-7)	GAM	Eisenbergiella	tayi	88.65	0.9929		LDE-2
0041_31623071300581_(C1-21)	GAM	Eisenbergiella	tayi	88.538	0.9929		LDE-2
0005_31623071100483_(C)	GAM	Eisenbergiella	tayi	87.95	0.9929		LDE-2
0009_31623070601237_(1-1-5)	GAM	Eisenbergiella	massiliensis	87.821	0.9929		LDE-2
0015_31623071300568_(C1-8)	GAM	Eisenbergiella	massiliensis	87.721	0.9929		LDE-2
0009_31623071300565_(C1-5)	GAM	Eisenbergiella	massiliensis	87.692	0.9929		LDE-2
0037_31623071300579_(C1-19)	GAM	Eisenbergiella	massiliensis	87.646	0.9929		LDE-2
0029_31623070601247_(1-1-15)	GAM	Eisenbergiella	massiliensis	87.574	0.9929		LDE-2
0027_31623070601246_(1-1-14)	GAM	Eisenbergiella	massiliensis	87.564	0.9929		LDE-2
0005_31623071300563_(C1-3)	GAM	Eisenbergiella	massiliensis	87.445	0.9929		LDE-2
0001_31623071300561_(C1-1)	GAM	Eisenbergiella	massiliensis	87.436	0.9929		LDE-2
0095_31623070601280_(1-1-48)	GAM	Eisenbergiella	massiliensis	87.306	0.9929		LDE-2
0021_31623070601243_(1-1-11)	GAM	Eisenbergiella	massiliensis	87.234	0.9929		LDE-2
0011_31623071100486_(F)	GAM	Eisenbergiella	massiliensis	87.215	0.9929		LDE-2
0013_31623071100487_(G)	GAM	Eisenbergiella	massiliensis	87.059	0.9929		LDE-2
0075_31623070601270_(1-1-38)	GAM	Eisenbergiella	massiliensis	87.041	0.9929		LDE-2
0053_31623070601259_(1-1-27)	GAM	Eisenbergiella	massiliensis	87.023	0.9929		LDE-2
0063_31623070601264_(1-1-32)	GAM	Eisenbergiella	massiliensis	86.602	0.9929		LDE-2
0035_31623070601250_(1-1-18)	GAM	Eisenbergiella	massiliensis	86.565	0.9929		LDE-2
0029_31623062803091_(1-15)	GAM	Eisenbergiella	massiliensis	86.481	0.9929		LDE-2
g16	TSA	Acinetobacter	schindleri	99.37			Acinetobacter schindleri
C21	TSA	Bacteroides	acidifaciens	99.84			Bacteroides acidifaciens
g03	TSA	Bacteroides	uniformis	99.84			Bacteroides uniformis
g07	TSA	Bacteroides	sp.	94.25			Bacteroides sp.
g12	TSA	Bifidobacterium	catenulatum	100			Bifidobacterium catenulatum
g13	TSA	Bifidobacterium	catenulatum	100			Bifidobacterium catenulatum
g14	TSA	Bifidobacterium	catenulatum	100			Bifidobacterium catenulatum
g18	TSA	Bifidobacterium	catenulatum	100			Bifidobacterium catenulatum
g21	TSA	Bifidobacterium	catenulatum	100			Bifidobacterium catenulatum
g22	TSA	Bifidobacterium	catenulatum	100			Bifidobacterium catenulatum
FX4	PYG	Clostridium	tertium	100			Clostridium tertium
AB2	RCM	Clostridium	tertium	100			Clostridium tertium
AC1	RCM	Clostridium	tertium	100			Clostridium tertium
AC3	RCM	Clostridium	tertium	100			Clostridium tertium
AC5	RCM	Clostridium	tertium	100			Clostridium tertium
AC7	RCM	Clostridium	tertium	100			Clostridium tertium
AD10	RCM	Clostridium	tertium	100			Clostridium tertium
AD4	RCM	Clostridium	tertium	100			Clostridium tertium
AE2	RCM	Clostridium	tertium	100			Clostridium tertium
AF2	RCM	Clostridium	tertium	100			Clostridium tertium
G7E	RCM	Clostridium	tertium	100			Clostridium tertium
AE7	RCM	Clostridium	tertium	99.53			Clostridium tertium
RJ2	TPY	Clostridium	tertium	100			Clostridium tertium
RJ3	TPY	Clostridium	tertium	100			Clostridium tertium
BR1	CMM	Delftia	sp.	96.74			Delftia sp.
c03	PYG	Dialister	massiliensis	99.84			Dialister massiliensis
g15	TSA	Eggerthella	lenta	97.51			Eggerthella lenta
g17	TSA	Eggerthella	lenta	97.48			Eggerthella lenta
CS3B	PYG	Enterococcaceae	sp.	81.35			Enterococcaceae sp.
g05	TSA	Enterococcus	avium	100			Enterococcus avium
BJ3	CMM	Enterococcus	faecalis	99.69			Enterococcus faecalis
BJ4	CMM	Enterococcus	faecalis	99.53			Enterococcus faecalis
BJ2	CMM	Enterococcus	faecalis	99.38			Enterococcus faecalis
AD2	RCM	Enterococcus	faecalis	100			Enterococcus faecalis
AC11	RCM	Enterococcus	faecalis	99.84			Enterococcus faecalis
AC9	RCM	Enterococcus	faecalis	99.84			Enterococcus faecalis
IG3	RCM	Enterococcus	faecalis	99.84			Enterococcus faecalis
IG15	RCM	Enterococcus	faecalis	99.69			Enterococcus faecalis
IG10	RCM	Enterococcus	faecalis	99.68			Enterococcus faecalis
IG11	RCM	Enterococcus	faecalis	99.53			Enterococcus faecalis
IG13	RCM	Enterococcus	faecalis	99.38			Enterococcus faecalis
RX122	TPY	Enterococcus	faecalis	99.38			Enterococcus faecalis
RJ1	TPY	Enterococcus	faecalis	99.22			Enterococcus faecalis
RX121	TPY	Enterococcus	faecalis	99.07			Enterococcus faecalis
g02	TSA	Enterococcus	faecalis	100			Enterococcus faecalis
b01	CMM	Escherichia	coli	100			Escherichia coli
b03	CMM	Escherichia	coli	100			Escherichia coli
Bp01	CMM	Escherichia	coli	100			Escherichia coli
CSa01	PYG	Escherichia	coli	100			Escherichia coli
305	TPY	Escherichia	fergusonii	100			Escherichia fergusonii
301	TPY	Escherichia	fergusonii	99.69			Escherichia fergusonii
b02	CMM	Eubacterium	limosum	100			Eubacterium limosum
g11	TSA	Eubacterium	limosum	100			Eubacterium limosum
RX14	TPY	Faecalibaculum	rodentium	98.12			Faecalibaculum rodentium
IG9	RCM	Lactobacillus	gasseri	99.68			Lactobacillus gasseri
IG19	RCM	Lactobacillus	johnsonii	99.69			Lactobacillus johnsonii
IG7	RCM	Lactobacillus	johnsonii	99.69			Lactobacillus johnsonii
IG8	RCM	Lactobacillus	johnsonii	99.69			Lactobacillus johnsonii
RX13	TPY	Lactobacillus	reuteri	99.53			Lactobacillus reuteri
RX15	TPY	Lactobacillus	reuteri	99.38			Lactobacillus reuteri
AE8	RCM	Ligilactobacillus	murinus	100			Ligilactobacillus murinus
RX11	TPY	Ligilactobacillus	murinus	99.84			Ligilactobacillus murinus
IG18	RCM	Limosilactobacillus	reuteri	99.84			Limosilactobacillus reuteri
IG2	RCM	Limosilactobacillus	reuteri	99.84			Limosilactobacillus reuteri
0169_31623062803161_(1-85)	YCFAN	Mesobacillus	jeotgali	99.65			Mesobacillus eotgali
0177_31623062803165_(1-89)	YCFAN	Mesobacillus	jeotgali	99.647			Mesobacillus eotgali
0171_31623062803162_(1-86)	YCFAN	Mesobacillus	jeotgali	99.509			Mesobacillus eotgali
0175_31623062803164_(1-88)	YCFAN	Mesobacillus	jeotgali	99.435			Mesobacillus eotgali
0119_31623062803136_(1-60)	YCFA	Anaerotignum	lactatifermentans	96.591			Anaerotignum nov.sp.
0021_31623062803087_(1-11)	GAM	Ruminococcus	gnavus	95.17			Ruminococcus nov.sp.
0039_31623062803096_(1-20)	GAM	Ruminococcus	gnavus	95.132			Ruminococcus nov.sp.
0059_31623062803106_(1-30)	GAM	Ruminococcus	gnavus	95.096			Ruminococcus nov.sp.
0085_31623062803119_(1-43)	GAM	Ruminococcus	gnavus	95			Ruminococcus nov.sp.
0073_31623062803113_(1-37)	YCFA	Ruminococcus	gnavus	94.652			Ruminococcus nov.sp.
0073_31623062803113_(1-37)	YCFA	Ruminococcus	gnavus	94.652			Ruminococcus nov.sp.
0041_31623070601253_(1-1-21)	YCFA	Ruminococcus	gnavus	94.468			Ruminococcus nov.sp.
0087_31623062803120_(1-44)	YCFA	Ruminococcus	gnavus	94.051			Ruminococcus nov.sp.
0125_31623070601295_(1-1-63)	GAM	Robinsoniella	peoriensis	93.527			Roseburia nov.sp.
0102_31623062803127_(1-51)	GAM	Robinsoniella	peoriensis	93.452			Roseburia nov.sp.
0026_31623062803089_(1-13)	GAM	Robinsoniella	peoriensis	93.39			Roseburia nov.sp.
0118_31623070601291_(1-1-59)	GAMN	Robinsoniella	peoriensis	93.366			Roseburia nov.sp.
0046_31623062803099_(1-23)	GAMN	Robinsoniella	peoriensis	93.31			Roseburia nov.sp.
0131_31623070601298_(1-1-66)	GAMN	Robinsoniella	peoriensis	93.239			Roseburia nov.sp.
0036_31623062803094_(1-18)	GAMN	Robinsoniella	peoriensis	93.22			Roseburia nov.sp.
0145_31623062803149_(1-73)	YCFA	Robinsoniella	peoriensis	93.039			Roseburia nov.sp.
0133_31623062803143_(1-67)	YCFA	Robinsoniella	peoriensis	92.906			Roseburia nov.sp.
0139_31623062803146_(1-70)	YCFA	Robinsoniella	peoriensis	92.582			Roseburia nov.sp.
0149_31623062803151_(1-75)	YCFA	Robinsoniella	peoriensis	91.722			Roseburia nov.sp.
0123_31623070601294_(1-1-62)	YCFA	Robinsoniella	peoriensis	88.17			Roseburia nov.sp.
0115_31623070601290_(1-1-58)	YCFA	Roseburia	inulinivorans	91.649			Roseburia nov.sp.
0155_31623062803154_(1-78)	GAMN	Flavonifractor	plautii	99.783			Flavonifractor plautii
0163_31623062803158_(1-82)	GAMN	Flavonifractor	plautii	99.711			Flavonifractor plautii
0179_31623062803166_(1-90)	GAMN	Flavonifractor	plautii	99.71			Flavonifractor plautii
0143_31623062803148_(1-72)	YCFA	Flavonifractor	plautii	99.706			Flavonifractor plautii
0161_31623062803157_(1-81)	YCFA	Flavonifractor	plautii	99.637			Flavonifractor plautii
0159_31623062803156_(1-80)	YCFAN	Flavonifractor	plautii	99.567			Flavonifractor plautii
0147_31623062803150_(1-74)	YCFAN	Flavonifractor	plautii	99.498			Flavonifractor plautii
0139_31623070601302_(1-1-70)	YCFAN	Flavonifractor	plautii	99.435			Flavonifractor plautii
0121_31623070601293_(1-1-61)	YCFAN	Flavonifractor	plautii	99.432			Flavonifractor plautii
0127_31623070601296_(1-1-64)	YCFAN	Flavonifractor	plautii	99.432			Flavonifractor plautii
0033_31623062803093_(1-17)	GAM	Faecalicatena	contorta	99.499			Faecalicatena contorta
0009_31623062803081_(1-5)	GAM	Faecalicatena	contorta	95.04			Faecalicatena nov.sp.
0015_31623062803084_(1-8)	GAM	Faecalicatena	contorta	94.989			Faecalicatena nov.sp.
0053_31623062803103_(1-27)	GAM	Faecalicatena	contorta	94.961			Faecalicatena nov.sp.
0113_31623062803133_(1-57)	GAM	Bacteroides	uniformis	96.47			Bacteroides nov.sp.
0111_31623070601288_(1-1-56)	YCFA	Bacteroides	uniformis	96.688			Bacteroides nov.sp.
0091_31623062803122_(1-46)	YCFA	Bacteroides	uniformis	96.683			Bacteroides nov.sp.
0107_31623062803130_(1-54)	YCFA	Bacteroides	uniformis	96.671			Bacteroides nov.sp.
0125_31623062803139_(1-63)	YCFA	Bacteroides	uniformis	96.664			Bacteroides nov.sp.
0079_31623062803116_(1-40)	YCFA	Bacteroides	uniformis	96.66			Bacteroides nov.sp.
0079_31623062803116_(1-40)	YCFA	Bacteroides	uniformis	96.66			Bacteroides nov.sp.
0113_31623070601289_(1-1-57)	YCFA	Bacteroides	uniformis	96.64			Bacteroides nov.sp.
0097_31623062803125_(1-49)	YCFA	Bacteroides	uniformis	96.631			Bacteroides nov.sp.
0081_31623062803117_(1-41)	YCFA	Bacteroides	uniformis	96.586			Bacteroides nov.sp.
0123_31623062803138_(1-62)	YCFA	Bacteroides	uniformis	96.571			Bacteroides nov.sp.
0099_31623062803126_(1-50)	YCFA	Bacteroides	uniformis	96.567			Bacteroides nov.sp.
0127_31623062803140_(1-64)	YCFA	Bacteroides	uniformis	96.532			Bacteroides nov.sp.
0077_31623062803115_(1-39)	YCFA	Bacteroides	uniformis	96.532			Bacteroides nov.sp.
0077_31623062803115_(1-39)	YCFA	Bacteroides	uniformis	96.532			Bacteroides nov.sp.
0121_31623062803137_(1-61)	YCFA	Bacteroides	uniformis	96.502			Bacteroides nov.sp.
0105_31623062803129_(1-53)	YCFA	Bacteroides	uniformis	96.495			Bacteroides nov.sp.
0131_31623062803142_(1-66)	YCFA	Bacteroides	uniformis	96.485			Bacteroides nov.sp.
0063_31623062803108_(1-32)	GAM	Parabacteroides	goldsteinii	99.857			Parabacteroides goldsteinii
0037_31623062803095_(1-19)	GAM	Parabacteroides	goldsteinii	99.857			Parabacteroides goldsteinii
0047_31623062803100_(1-24)	GAM	Parabacteroides	goldsteinii	99.854			Parabacteroides goldsteinii
0005_31623062803079_(1-3)	GAM	Parabacteroides	goldsteinii	99.786			Parabacteroides goldsteinii
0069_31623062803111_(1-35)	GAM	Parabacteroides	goldsteinii	99.786			Parabacteroides goldsteinii
0069_31623062803111_(1-35)	GAM	Parabacteroides	goldsteinii	99.786			Parabacteroides goldsteinii
0117_31623062803135_(1-59)	GAM	Parabacteroides	goldsteinii	99.785			Parabacteroides goldsteinii
0027_31623062803090_(1-14)	YCFA	Parabacteroides	goldsteinii	99.645			Parabacteroides goldsteinii
0157_31623062803155_(1-79)	GAM	Clostridioides	difficile	100			Clostridioides difficile
0173_31623062803163_(1-87)	GAMN	Clostridioides	difficile	99.927			Clostridioides difficile
0135_31623070601300_(1-1-68)	YCFA	Clostridioides	difficile	99.927			Clostridioides difficile
0153_31623062803153_(1-77)	YCFA	Clostridioides	difficile	99.926			Clostridioides difficile
0019_31623062803086_(1-10)	YCFA	Clostridioides	difficile	99.855			Clostridioides difficile
0133_31623070601299_(1-1-67)	YCFAN	Clostridioides	difficile	99.855			Clostridioides difficile
0129_31623070601297_(1-1-65)	YCFAN	Clostridioides	difficile	99.712			Clostridioides difficile
0030_31623071300575_(C1-15)	GAM	Lacticaseibacillus	rhamnosus	99.714			Lacticaseibacillus rhamnosus
0017_31623062803085_(1-9)	GAM	Adlercreutzia	caecimuris	99.135			Adlercreutzia caecimuris
0105_31623070601285_(1-1-53)	GAM	Adlercreutzia	caecimuris	98.924			Adlercreutzia caecimuris
0093_31623062803123_(1-47)	GAM	Faecalicatena	orotica	95.004			Faecalicatena nov.sp.
0023_31623062803088_(1-12)	GAM	Faecalicatena	orotica	94.986			Faecalicatena nov.sp.
0049_31623070601257_(1-1-25)	GAM	Faecalicatena	orotica	94.922			Faecalicatena nov.sp.
0065_31623062803109_(1-33)	GAM	Faecalicatena	orotica	94.744			Faecalicatena nov.sp.
0065_31623062803109_(1-33)	YCFA	Faecalicatena	orotica	94.744			Faecalicatena nov.sp.
0055_31623062803104_(1-28)	GAM	Faecalicatena	contorta	95.094			Faecalicatena nov.sp.
0049_31623062803101_(1-25)	GAM	Parvibacter	caecicola	99.927			Parvibacter caecicola
0043_31623062803098_(1-22)	GAM	Parvibacter	caecicola	99.926			Parvibacter caecicola
0011_31623062803082_(1-6)	GAM	Parvibacter	caecicola	99.783			Parvibacter caecicola
0001_31623062803077_(1-1)	GAM	Parvibacter	caecicola	99.712			Parvibacter caecicola
0041_31623062803097_(1-21)	GAM	Parvibacter	caecicola	99.708			Parvibacter caecicola
0037_31623070601251_(1-1-19)	GAM	Parvibacter	caecicola	96.035			Parvibacter nov.sp.
0051_31623062803102_(1-26)	GAM	Parvibacter	caecicola	96.014			Parvibacter nov.sp.
0107_31623070601286_(1-1-54)	GAM	Parvibacter	caecicola	95.723			Parvibacter nov.sp.
0141_31623062803147_(1-71)	YCFA	Clostridium	symbiosum	98.272			Clostridium nov.sp.
0137_31623062803145_(1-69)	YCFA	Clostridium	symbiosum	98.27			Clostridium nov.sp.
0075_31623062803114_(1-38)	YCFA	Clostridium	symbiosum	98.103			Clostridium nov.sp.
0075_31623062803114_(1-38)	YCFA	Clostridium	symbiosum	98.103			Clostridium nov.sp.
0003_31623062803078_(1-2)	GAM	Clostridium	cocleatum	99.351			Clostridium cocleatum
0135_31623062803144_(1-68)	YCFA	Clostridium	cocleatum	99.348			Clostridium cocleatum
0115_31623062803134_(1-58)	YCFA	Clostridium	cocleatum	99.282			Clostridium cocleatum
0167_31623062803160_(1-84)	YCFA	Clostridium	cocleatum	99.205			Clostridium cocleatum
0119_31623070601292_(1-1-60)	YCFAN	Clostridium	cocleatum	99.15			Clostridium cocleatum
0070_31623062803110_(1-34)	GAM	Adlercreutzia	muris	99.124			Adlercreutzia muris
0070_31623062803110_(1-34)	GAM	Adlercreutzia	muris	99.124			Adlercreutzia muris
0031_31623062803092_(1-16)	GAM	Adlercreutzia	muris	98.473			Adlercreutzia nov.sp.
0089_31623070601277_(1-1-45)	GAM	Adlercreutzia	muris	98.106			Adlercreutzia nov.sp.
0103_31623070601284_(1-1-52)	GAM	Adlercreutzia	muris	97.972			Adlercreutzia nov.sp.
0039_31623070601252_(1-1-20)	GAM	Adlercreutzia	muris	97.582			Adlercreutzia nov.sp.
0043_31623070601254_(1-1-22)	GAM	Adlercreutzia	muris	97.538			Adlercreutzia nov.sp.
0013_31623070601239_(1-1-7)	GAM	Adlercreutzia	muris	97.451			Adlercreutzia nov.sp.
0099_31623070601282_(1-1-50)	GAM	Adlercreutzia	muris	97.104			Adlercreutzia nov.sp.
0141_31623070601303_(1-1-71)	GAM	Adlercreutzia	muris	97.104			Adlercreutzia nov.sp.
0045_31623070601255_(1-1-23)	GAM	Adlercreutzia	muris	97.076			Adlercreutzia nov.sp.
0081_31623070601273_(1-1-41)	YCFA	Adlercreutzia	muris	96.711			Adlercreutzia nov.sp.
0055_31623070601260_(1-1-28)	GAM	Ihubacter	massiliensis	95.674			Ihubacter nov.sp.
0033_31623070601249_(1-1-17)	GAM	Schaedlerella	arabinosiphila	99.858			Schaedlerella arabinosiphila
0007_31623062803080_(1-4)	GAM	Schaedlerella	arabinosiphila	99.857			Schaedlerella arabinosiphila
0071_31623062803112_(1-36)	GAM	Schaedlerella	arabinosiphila	99.857			Schaedlerella arabinosiphila
0071_31623062803112_(1-36)	GAM	Schaedlerella	arabinosiphila	99.857			Schaedlerella arabinosiphila
0013_31623062803083_(1-7)	GAM	Schaedlerella	arabinosiphila	99.857			Schaedlerella arabinosiphila
0057_31623062803105_(1-29)	GAM	Schaedlerella	arabinosiphila	99.855			Schaedlerella arabinosiphila
0089_31623062803121_(1-45)	GAM	Schaedlerella	arabinosiphila	99.785			Schaedlerella arabinosiphila
0059_31623070601262_(1-1-30)	GAM	Schaedlerella	arabinosiphila	99.717			Schaedlerella arabinosiphila
0024_31623070601244_(1-1-12)	YCFA	Schaedlerella	arabinosiphila	96.444			Schaedlerella nov.sp.
0003_31623070601234_(1-1-2)	GAM	Novisyntrophococcus	fermenticellae	88.381			Lachnospiraceae nov.sp.
0007_31623070601236_(1-1-4)	GAM	Novisyntrophococcus	fermenticellae	87.054			Lachnospiraceae nov.sp.
0143_31623070601304_(1-1-72)	GAM	Novisyntrophococcus	fermenticellae	86.519			Lachnospiraceae nov.sp.
0011_31623070601238_(1-1-6)	GAM	Novisyntrophococcus	fermenticellae	85.862			Lachnospiraceae nov.sp.
0001_31623070601233_(1-1-1)	GAM	Novisyntrophococcus	fermenticellae	85.21			Lachnospiraceae nov.sp.
0045_31623071300583_(C1-23)	YCFA	Novisyntrophococcus	fermenticellae	87.296			Lachnospiraceae nov.sp.
0017_31623071300569_(C1-9)	YCFA	Novisyntrophococcus	fermenticellae	87.138			Lachnospiraceae nov.sp.
0070_31623070601267_(1-1-35)	GAM	Olsenella	massiliensis	94.857			Olsenella nov.sp.
0025_31623070601245_(1-1-13)	GAM	Olsenella	massiliensis	94.113			Olsenella nov.sp.
0109_31623070601287_(1-1-55)	GAM	Olsenella	massiliensis	93.989			Olsenella nov.sp.
0017_31623070601241_(1-1-9)	GAM	Olsenella	massiliensis	93.909			Olsenella nov.sp.
0061_31623070601263_(1-1-31)	GAM	Olsenella	massiliensis	93.803			Olsenella nov.sp.
0015_31623070601240_(1-1-8)	GAM	Olsenella	massiliensis	93.68			Olsenella nov.sp.
0095_31623062803124_(1-48)	YCFA	Olsenella	massiliensis	94.989			Olsenella nov.sp.
0083_31623062803118_(1-42)	YCFA	Olsenella	massiliensis	93.98			Olsenella nov.sp.
C215	TSA	Parabacteroides	goldsteinii	100			Parabacteroides goldsteinii
C216	TSA	Parabacteroides	goldsteinii	100			Parabacteroides goldsteinii
C24	TSA	Parabacteroides	goldsteinii	100			Parabacteroides goldsteinii
C25	TSA	Parabacteroides	goldsteinii	100			Parabacteroides goldsteinii
C27	TSA	Parabacteroides	goldsteinii	100			Parabacteroides goldsteinii
303	TPY	Paraclostridium	bifermentans	100			Paraclostridium bifermentans
306	TPY	Paraclostridium	bifermentans	100			Paraclostridium bifermentans
CS2E	PYG	Staphylococcus	epidermidis	100			Staphylococcus epidermidis
CS2H	PYG	Staphylococcus	epidermidis	99.84			Staphylococcus epidermidis
CS5H	PYG	Staphylococcus	epidermidis	99.37			Staphylococcus epidermidis
CP21	PYG	Veillonella	parvula	100			Veillonella parvula

## Sheet: Supplementary Table 4
Supplementary Table 4. Metabolites in the pre-culture and post-culture media of OTU68.
Index	Compounds	CAS	ChEBI	Human Metabolome Database	KEGG	ChemBank	The Scripps Research Institute Molecular Screening Center	Class I	Class II	Formula	Level	score	CAS	post-culture-1	post-culture-2	post-culture-3	pre-culture-1	pre-culture-2	pre-culture-3	VIP
MW0107605	Jubanine B	No result	No result	HMDB0030206	No result	No result	No result	Benzene and substituted derivatives	Benzene and substituted derivatives	C43H47N5O6	3	0.6017	60375-08-8	2.87278e+07	2.53199e+07	2.42587e+07	4.61192e+06	5.2747e+06	5.1137e+06	1.29579
MW0102947	Trigoneoside XIb	No result	No result	HMDB0036485	No result	No result	No result	Steroids	Steroid	C44H74O19	3	0.6163	290347-58-9	2.02123e+07	1.85077e+07	1.62841e+07	3.59265e+06	4.23632e+06	4.0463e+06	1.29279
MW0000471	Tritoqualine	14504-73-5 1470-79-7	No result	HMDB0240249	D07405	No result	No result	Alkaloids	Isoquinoline alkaloids	C26H32N2O8	3	0.6673	14504-73-5	1.86964e+07	1.79493e+07	1.66741e+07	4.7499e+06	4.98384e+06	4.91204e+06	1.29787
MW0152595	Leucomycin V	1392-21-8 22875-15-6 39405-35-1	CHEBI:31753	No result	C13103 C14064	No result	No result	Aldehyde,Ketones,Esters	Esters	C35H59NO13	3	0.673	1392-21-8 | 39405-35-1 | 22875-15-6	1.70872e+07	1.65346e+07	1.45331e+07	3.62482e+06	4.19264e+06	4.04528e+06	1.29401
MW0016267	Butyl(S)-3-hydroxybutyrate [arabinosyl-(1->6)-glucoside]							FA	Esters	C19H34O12	3	0.6477	-	1.7297e+07	1.64453e+07	1.45759e+07	3.97182e+06	4.12332e+06	4.17564e+06	1.29611
MW0009741	Sildenafil	139755-83-2	CHEBI:9139	HMDB0005039	C07259 D08514	BSPBio_003424 Spectrum5_001508	No result	Benzene and substituted derivatives	Benzene and substituted derivatives	C22H30N6O4S	3	0.7512	139755-83-2	1.74407e+07	1.71289e+07	1.59871e+07	4.88581e+06	5.17841e+06	5.11562e+06	1.29805
MW0146728	Bikhaconitine	6078-26-8	CHEBI:3097	No result	C08664	No result	No result	Benzene and substituted derivatives	Benzene and substituted derivatives	C36H51NO11	3	0.5134	6078-26-8	1.3695e+07	1.33236e+07	1.21786e+07	3.30834e+06	3.49059e+06	3.43761e+06	1.29775
MEDP1884	Prolyl-Histidine	100896-87-5 92027-43-5	No result	HMDB0029019	No result	No result	No result	Amino acid and Its metabolites	Small Peptide	C11H16N4O3	2	0.8596	92027-43-5	1.53576e+07	1.54914e+07	1.26375e+07	4.23957e+06	5.77341e+06	5.19967e+06	1.27068
MW0151313	Ile-Ala-Leu-Arg	No result	No result	No result	No result	No result	No result	Amino acid and Its metabolites	Small Peptide	C21H41N7O5	3	0.6873	-	1.04961e+07	1.01331e+07	9.40827e+06	672811	839551	753459	1.29776
MW0149734	Gln-Leu-Asn-Arg	No result	No result	No result	No result	No result	No result	Amino acid and Its metabolites	Small Peptide	C21H39N9O7	3	0.782	-	1.53212e+07	1.45826e+07	1.2937e+07	4.83916e+06	5.80514e+06	5.52639e+06	1.28483
MW0155249	Phe-Leu-Glu-Lys-Asp	No result	No result	No result	No result	No result	No result	Amino acid and Its metabolites	Small Peptide	C30H46N6O10	3	0.758	-	1.36349e+07	1.20969e+07	1.11104e+07	3.12578e+06	3.64945e+06	3.49829e+06	1.29079
MW0169728	Pyridoxamine	524-36-7 85-87-0	CHEBI:16410	HMDB0001431	C00534	CBDivE_013510 Oprea1_400404	No result	Heterocyclic compounds	Heterocyclic compounds	C8H12N2O2	3	0.6134	85-87-0	1.50035e+07	1.44782e+07	1.49694e+07	6.18963e+06	6.82177e+06	6.77596e+06	1.29516
MW0166803	2,4-Di(isovaleryl)sucrose	No result	No result	No result	No result	No result	No result	Others	Others	C22H38O13	3	0.708	-	1.222e+07	1.1764e+07	1.10119e+07	3.44713e+06	3.76777e+06	3.71832e+06	1.29656
MW0143339	4-Hydroxy-2-oxopentanoic acid							Aldehyde,Ketones,Esters	Esters	C5H8O4	2	0.9747	3318-73-8	315179	276934	260878	7.72806e+06	8.44801e+06	8.23338e+06	1.29909
MW0144470	Ala-Arg-Gln-Ala-Leu	No result	No result	No result	No result	No result	No result	Amino acid and Its metabolites	Small Peptide	C23H43N9O7	3	0.6913	-	8.88986e+06	8.17305e+06	7.41529e+06	1.57654e+06	1.84125e+06	1.6825e+06	1.29477
MW0155086	Phe-Arg-Ala-Asp	No result	No result	No result	No result	No result	No result	Amino acid and Its metabolites	Small Peptide	C22H33N7O7	2	0.9153	-	8.82019e+06	7.54816e+06	7.32854e+06	1.40246e+06	1.53207e+06	1.50594e+06	1.29616
MW0139561	Resveratrol-3-O-sulfate							Others	Others	C14H12O6S	3	0.502	-	545628	455630	295568	6.64525e+06	6.8897e+06	6.73729e+06	1.28873
MW0011745	Strophanthidin semicarbazide	No result	No result	No result	No result	Spectrum5_000214	No result	Alcohol and amines	Polyamines	C24H35N3O6	3	0.6078	-	7.9285e+06	1.0238e+07	6.60785e+06	1.81464e+06	2.03495e+06	2.02951e+06	1.2779
MW0155069	Phe-Ala-Arg-Asp	No result	No result	No result	No result	No result	No result	Amino acid and Its metabolites	Small Peptide	C22H33N7O7	2	0.9291	-	8.09499e+06	7.80614e+06	7.40018e+06	2.11418e+06	2.1749e+06	2.12681e+06	1.29879
MW0146759	Bipindoside	6246-79-3	CHEBI:3115	No result	C08851	No result	No result	Heterocyclic compounds	Heterocyclic compounds	C29H44O10	3	0.5357	6246-79-3	6.99801e+06	6.82185e+06	6.68375e+06	1.23109e+06	1.37331e+06	1.34053e+06	1.29855
MW0152344	Leu-Gly-His-Phe-Met	No result	No result	No result	No result	No result	No result	Amino acid and Its metabolites	Small Peptide	C28H41N7O6S	3	0.8936	-	8.46607e+06	8.10333e+06	7249675	2.382e+06	2.53981e+06	2.485e+06	1.2952
MW0140730	(Z)-4-(2-Hydroxy-5-sulfonatophenyl)-2-oxo-3-butenoate							Aldehyde,Ketones,Esters	Esters	C10H8O7S	3	0.644	-	470118	449586	398745	5.47471e+06	5.98474e+06	5.83269e+06	1.29877
MW0049071	Cucurbitacin I 2-glucoside	No result	No result	HMDB0035701	No result	No result	No result	Steroids	Steroid	C36H52O12	3	0.5694	29803-94-9	6.05646e+06	7.88395e+06	5.11208e+06	1.15662e+06	1.34014e+06	1.31446e+06	1.28177
MW0112627	3,4,5-trihydroxy-6-{[4-methoxy-6-(3-oxoprop-1-en-1-yl)-2H-1,3-benzodioxol-5-yl]oxy}oxane-2-carboxylic acid							Benzene and substituted derivatives	Benzene and substituted derivatives	C17H18O11	3	0.5671	-	8.36246e+06	7.45614e+06	1.19774e+07	4.08702e+06	4.30619e+06	4.27602e+06	1.21618
MW0142013	2,3-Dihydroxyindole							Heterocyclic compounds	Indole and Its derivatives	C8H7NO2	2	0.914	5638-85-7	191327	183110	177515	4.9412e+06	5.40153e+06	5.2643e+06	1.29973
MW0150091	Glu-Met-Leu-Val-Ala	No result	No result	No result	No result	No result	No result	Amino acid and Its metabolites	Small Peptide	C24H43N5O8S	3	0.8172	-	7.77294e+06	7.58737e+06	6.80731e+06	2.24678e+06	2.49389e+06	2.46619e+06	1.29413
MW0141336	magnesium;3-[(21S,22S)-26-ethyl-16-(1-hydroxyethyl)-12,17,21-trimethyl-4-oxo-11-propyl-23,25-diaza-7,24-diazanidahexacyclo[18.2.1.15,8.110,13.115,18.02,6]hexacosa-1,5,8(26),9,11,13(25),14,16,18,20(23)-decaen-22-yl]propanoic acid							Tryptamines,Cholines,Pigments	Pigments	C35H38MgN4O4	3	0.6908	-	6.54983e+06	6.17823e+06	5.59397e+06	1.28288e+06	1.45943e+06	1.44127e+06	1.29527
MW0111215	N-METHYLANILINE							Benzene and substituted derivatives	Benzene and substituted derivatives	C7H9N	3	0.5689	-	266066	277059	241937	4.37562e+06	4.79008e+06	4.66838e+06	1.29927
MW0004954	4-Ethynylaniline							Benzene and substituted derivatives	Benzene and substituted derivatives	C8H7N	2	0.9421	14235-81-5	530441	587116	595184	4.7312e+06	4.97109e+06	4.88945e+06	1.29921
MW0123741	Indole-3-lactic acid							Heterocyclic compounds	Indole and Its derivatives	C11H11NO3	2	0.917	1821-52-9 | 832-97-3	2.12892e+06	1.87876e+06	2.4175e+06	6.22823e+06	6.5438e+06	6.43655e+06	1.28856
MEDP1645	Benzamide							Alcohol and amines	Amines	C7H7NO	1b	0.8716	55-21-0	281371	244845	259362	4.23363e+06	4.62804e+06	4.51046e+06	1.29927
MW0152912	Lys-Asp-Thr-Lys	No result	No result	No result	No result	No result	No result	Amino acid and Its metabolites	Small Peptide	C20H38N6O8	3	0.7254	-	6.13816e+06	6.34924e+06	5.8979e+06	1.88986e+06	2.049e+06	1.8707e+06	1.29732
MW0109812	Tetraacetylethylenediamine	10543-57-4	No result	HMDB0040573	No result	No result	No result	Alcohol and amines	Amines	C10H16N2O4	3	0.8489	10543-57-4	6.20975e+06	4.89565e+06	5.13027e+06	1.12035e+06	1.39265e+06	1.31507e+06	1.28789
MW0155120	Phe-Asp-Arg-Asp	No result	No result	No result	No result	No result	No result	Amino acid and Its metabolites	Small Peptide	C23H33N7O9	3	0.832	-	2.59641e+06	6.79665e+06	5.67221e+06	1.68896e+06	835905	799470	1.15857
MW0141085	1,2-Anthracenediol							Benzene and substituted derivatives	Benzene and substituted derivatives	C14H10O2	3	0.6108	577-95-7 | 70143-54-3	391515	359550	344499	4.05878e+06	4.43689e+06	4.32417e+06	1.2991
MEDN0445	Orotidine							CoEnzyme and vitamins	CoEnzyme and vitamins	C10H12N2O8	1a	0.806	314-50-1	617190	684979	484833	4.18836e+06	4.43222e+06	4.35761e+06	1.29291
MW0113863	2'-Adenylic acid							Nucleotide and Its metabolites	Nucleotide and Its metabolites	C10H14N5O7P	2	0.8522	130-49-4 | 81012-86-4	17011.5	11821.9	13634.3	3.40804e+06	3.72336e+06	3.60346e+06	1.29896
MW0007401	Isocarboxazid							Benzene and substituted derivatives	Benzene and substituted derivatives	C12H13N3O2	3	0.6621	59-63-2	606150	605076	547228	3.97084e+06	4.17203e+06	4.10365e+06	1.29904
MW0052657	Estradiol dipropionate	113-38-2	CHEBI:31560	No result	C13077 D01617	No result	No result	Hormones and hormone related compounds	Hormones and hormone related compounds	C24H32O4	3	0.6815	113-38-2	7.29852e+06	6.66447e+06	6.27981e+06	3.44225e+06	3.67181e+06	3.04512e+06	1.27403
FDATN01519	D-phenylalanine	149597-91-1 150-30-1 5267-64-1 63-91-2 673-06-3 68227-59-8	CHEBI:16998	No result	C02265	IDI1_000453 Spectrum5_001137	No result	Amino acid and Its metabolites	Amino acids	C9H11NO2	2	0.9529	673-06-3	1.39005e+07	1.40761e+07	1.39803e+07	1.06041e+07	1.06763e+07	1.06508e+07	1.29926
MW0140706	(S)-2-ureidoglycine							Organic acid and Its derivatives	Organic acid and Its derivatives	C3H7N3O3	3	0.6998	-	225782	195905	189669	3.19145e+06	3.48876e+06	3.40013e+06	1.29881
MW0008844	1-(Naphthalen-2-yl)-2-(pyrrolidin-1-yl)pentan-1-one							Benzene and substituted derivatives	Benzene and substituted derivatives	C19H23NO	3	0.6742	-	377477	344184	333272	3.19272e+06	3.49016e+06	3.40149e+06	1.29895
MW0010643	Pinoresinol	487-36-5 51206-66-7 487-36-5 5444-65-5 7452-03-1	CHEBI:40	No result	C05366	ACon1_001809 MEGxp0_000829	No result	Lignans and Coumarins	Lignans	C20H22O6	3	0.6232	487-36-5	4.63665e+06	4.50435e+06	3.65541e+06	1.20827e+06	1.33532e+06	1.26969e+06	1.28856
MW0155571	Pikromycin	19721-56-3	CHEBI:29665	No result	C11999	No result	No result	Aldehyde,Ketones,Esters	Esters	C28H47NO8	3	0.51	19721-56-3	1.08198e+07	1.04454e+07	9.7047e+06	7.15832e+06	7.52101e+06	7.39774e+06	1.27252
MW0012827	1-Hexanol arabinosylglucoside	No result	No result	HMDB0031689	No result	No result	No result	Carbohydrates and Its metabolites	Carbohydrates and Its metabolites	C17H32O10	3	0.7075	124044-06-0	4.24295e+06	4.20156e+06	3.94322e+06	1.26922e+06	1.29121e+06	1.29742e+06	1.29887
MW0106126	Ceanothine C	No result	No result	HMDB0029340	No result	No result	No result	Amino acid and Its metabolites	Small Peptide	C26H38N4O4	3	0.7008	18658-42-9	3.42124e+06	3.22679e+06	4.18949e+06	708373	860010	804454	1.2888
MW0108369	N-(1-Deoxy-1-fructosyl)leucine	No result	No result	HMDB0037840	No result	No result	No result	Heterocyclic compounds	Heterocyclic compounds	C12H23NO7	3	0.6181	34393-18-5	6.09544e+06	5.32756e+06	4.84945e+06	2.52852e+06	2.74983e+06	2.66017e+06	1.27516
MW0151488	Ile-Leu-Glu-Asn-Gly	No result	No result	No result	No result	No result	No result	Amino acid and Its metabolites	Small Peptide	C23H40N6O9	3	0.8244	-	4.2549e+06	3.9554e+06	3.28227e+06	1.01511e+06	1.12532e+06	1.05497e+06	1.28908
MW0152336	Leu-Gly-Ala-Pro-Gly	No result	No result	No result	No result	No result	No result	Amino acid and Its metabolites	Small Peptide	C18H31N5O6	3	0.7205	-	4.03272e+06	3.91763e+06	3.48297e+06	1.45757e+06	1.60121e+06	334421	1.05669
MW0056729	Isomaltulose	13718-94-0	CHEBI:18394	No result	C01742	No result	No result	Carbohydrates and Its metabolites	Sugars	C12H22O11	2	0.9571	58166-27-1 | 15132-06-6	7.08674e+06	6.97577e+06	7.14069e+06	1.022e+07	9.1684e+06	9.80436e+06	1.27303
MW0003799	3-Amino-2-naphthoic acid	5959-52-4	No result	No result	No result	Oprea1_749540	No result	Benzene and substituted derivatives	Benzene and substituted derivatives	C11H9NO2	3	0.5846	5959-52-4	1.0113e+07	1.03136e+07	1.08792e+07	1.33236e+07	1.29877e+07	1.29116e+07	1.27184
MW0012303	9-Dihydro-13-acetylbaccatin III	142203-65-4	No result	No result	No result	No result	No result	Benzene and substituted derivatives	Benzene and substituted derivatives	C33H42O12	3	0.6208	142203-65-4	3.18645e+06	2.97433e+06	2.75724e+06	385480	425182	423154	1.29803
ZINC4096650	Berbamunine	485-18-7 6859-66-1	CHEBI:16777	No result	C05177	No result	No result	Heterocyclic compounds	Heterocyclic compounds	C36H40N2O6	3	0.7693	485-18-7 | 6859-66-1	3.55345e+06	3.51832e+06	3.34899e+06	992575	881637	866302	1.29717
MW0110148	Trunkamide	No result	No result	No result	No result	No result	No result	Alcohol and amines	Amines	C43H63N7O8S	3	0.7879	-	5.10398e+06	3.26453e+06	2.89949e+06	1.12245e+06	1.32744e+06	1.23929e+06	1.23495
MW0145876	Asn-Pro-Lys-Ala-Met	No result	No result	No result	No result	No result	No result	Amino acid and Its metabolites	Small Peptide	C23H41N7O7S	3	0.7476	-	3.88756e+06	3.76042e+06	3.35049e+06	1.18557e+06	1.21308e+06	1.19026e+06	1.29573
MW0149224	Floramultine	No result	CHEBI:80677	No result	C16713	No result	No result	Alkaloids	Alkaloids	C21H25NO5	3	0.8317	-	4.78562e+06	3.61669e+06	3.4475e+06	1.52203e+06	1.49866e+06	1.55192e+06	1.27041
MW0012045	11,12,14-Trihydroxy-7-methoxy-8,11,13-abietatrien-20,6-olide	No result	No result	HMDB0031932	No result	No result	No result	Benzene and substituted derivatives	Benzene and substituted derivatives	C21H28O6	3	0.693	197649-67-5	2.12021e+06	2.70988e+06	2.33665e+06	10357	27058.8	63810.2	1.26462
MW0108024	Lys-Trp-Lys	38579-27-0 493-33-4 4931-26-4	No result	No result	No result	No result	No result	Amino acid and Its metabolites	Small Peptide	C23H36N6O4	3	0.8228	38579-27-0	4.26334e+06	3.69383e+06	3.6986e+06	1.50439e+06	1.56995e+06	1.5664e+06	1.29245
MW0109539	S-(11-hydroxy-9-deoxy-delta12-PGD2)-glutathione	No result	No result	HMDB0013055	No result	No result	No result	Hormones and hormone related compounds	Hormones and hormone related compounds	C30H51N3O10S	3	0.5357	-	3.41689e+06	3.19754e+06	2.9994e+06	825028	893599	894818	1.29659
FDATN00862	Tilorone hydrochloride	27591-69-1 27591-69-1 93968-77-5 27591-97-5 28399-44-2	No result	No result	D06149	BSPBio_002610 ChemDiv1_019101 IDI1_000018 Oprea1_331997 Spectrum5_001889	No result	Others	Medicine	C25H36Cl2N2O3	3	0.6985	27591-69-1	2.74757e+06	2.60608e+06	2.24548e+06	321382	350411	218982	1.28663
MW0052422	Dioscin	19057-60-4 19492-96-7	CHEBI:74023	No result	C08897	No result	No result	Steroids	Steroid	C45H72O16	3	0.5267	19057-60-4	3.12158e+06	2.93261e+06	2.53999e+06	585762	722669	690679	1.29023
MW0169283	2-Amino-1-phenylethanol	1477-64-1 15995-85-4 20989-17-7 2549-14-6 4561-43-7 56613-81-1 7568-93-6	CHEBI:16343	HMDB0001065	C02735	Oprea1_790333	No result	Alcohol and amines	Alcohols	C8H11NO	2	0.943	7568-93-6	9.68229e+06	9.65092e+06	1.07513e+07	7.9559e+06	7.89388e+06	7.83976e+06	1.24461
MW0124285	Harderoporphyrinogen	42607-18-1 54219-81-7	No result	HMDB0002160	No result	No result	No result	Heterocyclic compounds	Heterocyclic compounds	C35H42N4O6	3	0.562	42607-18-1	4.01293e+06	3.89227e+06	3.48119e+06	1.7321e+06	1.64273e+06	1.62075e+06	1.29169
MW0054957	Mevinphos	243464-31-5 26718-65-0 7786-34-7 824-40-8			C18688		No result	Organic acid and Its derivatives	Phosphoric acids	C7H13O6P	3	0.5139	7786-34-7 | 298-01-1 | 26718-65-0	4.46746e+06	4.69524e+06	5.55338e+06	6.01708e+06	7.44709e+06	7.63244e+06	1.13751
MW0159322	Veratridine	71-62-5 74388-74-2 71-62-5 74389-68-7	CHEBI:28051	No result	C06544	BSPBio_001515	No result	Alkaloids	Alkaloids	C36H51NO11	3	0.8501	71-62-5	3.88334e+06	2.94816e+06	2.92756e+06	1.08851e+06	1.13588e+06	1.1774e+06	1.27878
MW0150524	Gly-Tyr-Tyr-Ser-Lys	No result	No result	No result	No result	No result	No result	Amino acid and Its metabolites	Small Peptide	C29H40N6O9	3	0.7613	-	2.37166e+06	2.34323e+06	1.99149e+06	103358	127858	213167	1.2831
MW0106514	DL-Leucine	25322-63-8 328-38-1 328-39-2 61-90-5 6268-56-0 7250-19-3 77769-21-2	CHEBI:25017	No result	No result	No result	No result	Amino acid and Its metabolites	Amino acids	C6H13NO2	2	0.958	328-39-2 | 25322-63-8 | 25988-64-1 | 7005-03-0	2.94993e+06	3.24229e+06	3.32921e+06	1.21369e+06	1.06266e+06	1.06672e+06	1.2926
MW0157856	Thr-Val-Asp-Lys	No result	No result	No result	No result	No result	No result	Amino acid and Its metabolites	Small Peptide	C19H35N5O8	3	0.6333	-	3.11086e+06	2.86746e+06	2469034	708848	791945	771947	1.29131
MW0155333	Phe-Ser-Leu-Phe-Asp	No result	No result	No result	No result	No result	No result	Amino acid and Its metabolites	Small Peptide	C31H41N5O9	3	0.7442	-	3.28477e+06	3.17086e+06	2.62537e+06	1.0758e+06	1.14152e+06	1.1669e+06	1.28562
MEDN1426	9(S),12(S),13(S)-TriHOME	No result	CHEBI:34506	HMDB0004708	C14833	No result	No result	FA	Oxidized lipids	C18H34O5	1a	0.9111	97134-11-7	4.867e+06	4.5913e+06	4.14957e+06	2.48096e+06	2.76046e+06	2.68166e+06	1.27212
MW0152464	Leu-Pro-Asp							Amino acid and Its metabolites	Small Peptide	C15H25N3O6	3	0.7618	-	2.5423e+06	2.40362e+06	2.93472e+06	379451	1.70145e+06	209920	1.02911
MW0153603	Met-Lys-Asn-His-Leu	No result	No result	No result	No result	No result	No result	Amino acid and Its metabolites	Small Peptide	C27H47N9O7S	3	0.8354	-	2.90279e+06	2.69358e+06	2.44383e+06	789674	897828	844771	1.29232
MW0151442	Ile-Gly-Val	No result	No result	No result	No result	No result	No result	Amino acid and Its metabolites	Small Peptide	C13H25N3O4	2	0.9489	-	2.96147e+06	3.03705e+06	2.78772e+06	1.08811e+06	1.15978e+06	1.08168e+06	1.29671
MW0120733	Anabasamine	20410-87-1 2348-46-1 23482-39-5 400738-05-8	No result	No result	No result	BSPBio_003333 Oprea1_185600 Spectrum5_000611	No result	Heterocyclic compounds	Heterocyclic compounds	C16H19N3	3	0.7939	20410-87-1 | 400738-05-8	3.78924e+06	3.83527e+06	3.24778e+06	1.64364e+06	2.01707e+06	1.87779e+06	1.26395
MW0150078	Glu-Lys-Leu-Thr-His	No result	No result	No result	No result	No result	No result	Amino acid and Its metabolites	Small Peptide	C27H46N8O9	3	0.8708	-	2.90537e+06	2.75879e+06	2.49466e+06	874128	1.01328e+06	1.00947e+06	1.28919
MW0159024	Val-His-Ile-Glu	No result	No result	No result	No result	No result	No result	Amino acid and Its metabolites	Small Peptide	C22H36N6O7	3	0.8743	-	2.51054e+06	2.6275e+06	2.2591e+06	699606	727089	710180	1.29638
MW0121708	5-Pyridoxolactone							Aldehyde,Ketones,Esters	Esters	C8H7NO3	2	0.9654	4543-56-0	205158	191422	188677	1.85937e+06	1.97912e+06	1.94672e+06	1.29949
MW0150517	Gly-Tyr-Ile-Ser-Ala	No result	No result	No result	No result	No result	No result	Amino acid and Its metabolites	Small Peptide	C23H35N5O8	3	0.6184	-	2.23884e+06	2.08124e+06	2.11093e+06	376102	419318	435638	1.29744
MW0158961	Val-Gln-Ala-Arg	No result	No result	No result	No result	No result	No result	Amino acid and Its metabolites	Small Peptide	C19H36N8O6	3	0.6697	-	2.47245e+06	2.32826e+06	2.1158e+06	506637	706558	552764	1.28322
MW0115063	Bardoxolone methyl	218600-53-4 21980-07-4 218600-53-4	No result	No result	D09585	No result	No result	Organic acid and Its derivatives	Organic acid and Its derivatives	C32H43NO4	3	0.635	218600-53-4	6.00766e+06	5.69673e+06	5.18893e+06	3.7281e+06	4.07542e+06	3.97188e+06	1.25154
MW0152120	Lappaconitine	32854-75-4 32854-75-4	CHEBI:6378	No result	C08694	No result	No result	Heterocyclic compounds	Heterocyclic compounds	C32H44N2O8	3	0.7274	32854-75-4	2.73322e+06	2.59337e+06	2.39702e+06	839756	890514	892385	1.29578
MW0155408	Phe-Val-His-Arg	No result	No result	No result	No result	No result	No result	Amino acid and Its metabolites	Small Peptide	C26H39N9O5	3	0.7884	-	2.29228e+06	2.19981e+06	2.17616e+06	518334	550287	579748	1.2981
MW0007231	Gallic acid	149-91-7 5995-86-8 6274-40-4	CHEBI:30778	HMDB0005807	C01424	BSPBio_001668 Oprea1_087792 Spectrum5_000108	No result	Benzene and substituted derivatives	Benzene and substituted derivatives	C7H6O5	3	0.7635	149-91-7	3.75134e+06	3.77685e+06	3.11776e+06	1.93683e+06	1.60393e+06	2.14378e+06	1.23347
MW0052653	Estradiol acetate	4245-41-4	No result	No result	D04061	No result	No result	Aldehyde,Ketones,Esters	Esters	C20H26O3	3	0.7377	4245-41-4	2.2944e+06	2.4018e+06	2.12116e+06	705851	703546	482693	1.27436
MW0158430	Tyr-Gln-Asn-Glu	No result	No result	No result	No result	No result	No result	Amino acid and Its metabolites	Small Peptide	C23H32N6O10	3	0.887	-	2.38731e+06	2.37076e+06	2.00612e+06	279983	785159	781594	1.16171
MW0132744	Sinapic acid							Organic acid and Its derivatives	Organic acid and Its derivatives	C11H12O5	3	0.708	7362-37-0	412487	344968	254738	1.87143e+06	2.04578e+06	1.9938e+06	1.28338
MW0104598	2-amino-4-({1-[(carboxymethyl)-C-hydroxycarbonimidoyl]-2-{[1-hydroxy-1-(4-hydroxy-3-methoxyphenyl)-3-oxobutan-2-yl]sulfanyl}ethyl}-C-hydroxycarbonimidoyl)butanoic acid							Organic acid and Its derivatives	Organic acid and Its derivatives	C21H29N3O10S	3	0.6493	-	1.86399e+06	3.11427e+06	2.82257e+06	762429	841453	1.32584e+06	1.17535
MW0145104	Angiotensin I/II (5-8)							Benzene and substituted derivatives	Benzene and substituted derivatives	C26H36N6O5	3	0.7684	34233-50-6	2.39249e+06	2.27173e+06	2.09865e+06	589099	663229	644209	1.29541
MW0103486	Nicotinamide mononucleotide	1094-61-7 1140909-84-7	CHEBI:16171 CHEBI:14648	HMDB0000229 HMDB0059645	C00455	No result	No result	Nucleotide and Its metabolites	Nucleotide and Its metabolites	C11H15N2O8P	3	0.6503	1094-61-7	2.43461e+06	1.89409e+06	858841	178453	93165	109226	1.25013
MW0150860	His-Asn-Phe-Lys	No result	No result	No result	No result	No result	No result	Amino acid and Its metabolites	Small Peptide	C25H36N8O6	3	0.78	-	2.58811e+06	2.30144e+06	1.84415e+06	594866	653158	680729	1.28107
MW0015654	All-trans-heptaprenyl diphosphate	No result	CHEBI:17613 CHEBI:53046	HMDB0012187	C04216	No result	No result	Organic acid and Its derivatives	Phosphoric acids	C35H60O7P2	3	0.611	76078-18-7	2.27506e+06	2.12011e+06	1.89257e+06	444509	588796	510634	1.28728
MW0145369	Arg-His-Asn-Lys	No result	No result	No result	No result	No result	No result	Amino acid and Its metabolites	Small Peptide	C22H39N11O6	3	0.7641	-	2.10832e+06	2.0042e+06	1.80487e+06	332158	376130	482837	1.28573
MW0109992	Tirofiban	144494-65-5	CHEBI:9605	HMDB0014913	C07965 D08607	No result	No result	Amino acid and Its metabolites	Amino acid derivatives	C22H36N2O5S	3	0.5927	144494-65-5	2.16468e+06	2.12499e+06	1.97156e+06	464295	498557	590350	1.292
MW0001578	(6S)-1-[4-(dimethylamino)-3-methylbenzyl]-5-(diphenylacetyl)-4,5,6,7-tetrahydro-1H-imidazo[4,5-c]pyridine-6-carboxylic acid							Benzene and substituted derivatives	Benzene and substituted derivatives	C31H32N4O3	3	0.8373	130663-39-7	2.16559e+06	2.18354e+06	2.08255e+06	553571	595744	597920	1.29851
MW0149650	Gln-Asp-Leu-Glu	No result	No result	No result	No result	No result	No result	Amino acid and Its metabolites	Small Peptide	C20H33N5O10	3	0.8744	-	1.97822e+06	1.90748e+06	2.26991e+06	490114	380276	676135	1.26174
MW0151559	Ile-Pro-His							Amino acid and Its metabolites	Small Peptide	C17H27N5O4	3	0.7464	-	2765912	2.1444e+06	1.82919e+06	896657	619904	632138	1.24743
MW0151410	Ile-Glu-Arg-Asp-Phe	No result	No result	No result	No result	No result	No result	Amino acid and Its metabolites	Small Peptide	C30H46N8O10	3	0.8806	-	3.06297e+06	2.77049e+06	2.28514e+06	1.06581e+06	1.25488e+06	1.22175e+06	1.26327
MW0105657	Arginyl-glycyl-aspartic acid							Amino acid and Its metabolites	Small Peptide	C12H22N6O6	3	0.6979	99896-85-2 | 119865-10-0 | 124123-27-9	2.37401e+06	1.8571e+06	1.54099e+06	2.46849e+06	3.93056e+06	3.94562e+06	1.06991
MW0151867	Isosinomenine	No result	CHEBI:81369	No result	C17899	No result	No result	Alkaloids	Isoquinoline alkaloids	C19H23NO4	3	0.7387	-	3.5658e+06	3.34727e+06	1.88523e+06	1.00098e+06	1.59576e+06	1.66908e+06	1.04769
MW0049024	Coroloside	No result	No result	HMDB0033703	No result	No result	No result	Heterocyclic compounds	Heterocyclic compounds	C35H54O12	3	0.6103	-	1.8855e+06	1.82488e+06	1.59992e+06	67741	382849	347616	1.14743
MW0109545	S-(2-boronoethyl)-L-cysteine	No result	CHEBI:59346	No result	No result	No result	No result	Amino acid and Its metabolites	Amino acid derivatives	C5H12BNO4S	3	0.5283	63107-40-4	2.53879e+06	2.0688e+06	1.6057e+06	368298	312586	1.03958e+06	1.1331
MW0134501	5-Hydroxy-2-(4-methoxyphenyl)-8-(3-methylbut-2-enyl)-3,7-bis[[3,4,5-trihydroxy-6-(hydroxymethyl)oxan-2-yl]oxy]chromen-4-one							Aldehyde,Ketones,Esters	Ketones	C33H40O16	3	0.533	-	2.664e+06	2.19173e+06	2.71738e+06	1.09344e+06	1.08902e+06	916578	1.27443
MW0155812	Pro-Asp-Ile							Amino acid and Its metabolites	Small Peptide	C15H25N3O6	3	0.8043	-	2.13608e+06	1.98252e+06	1.54907e+06	390992	473209	453546	1.28433
MW0194144	(Z)-7-[(2R)-2-amino-2-carboxyethyl]sulfanyl-2-[[(1R)-2,2-dimethylcyclopropanecarbonyl]amino]hept-2-enoic acid							Organic acid and Its derivatives	Organic acid and Its derivatives	C16H26N2O5S	2	0.821	-	2.25276e+06	1.7617e+06	1.55463e+06	534893	494949	248662	1.22677
MW0159157	Val-Ser-Gly-Pro-Glu							Amino acid and Its metabolites	Small Peptide	C20H33N5O9	3	0.7731	-	4.07184e+06	3.83362e+06	3.09899e+06	4.71379e+06	5.52334e+06	5.0529e+06	1.13088
MW0127313	3-Methylthiopropylamine							Heterocyclic compounds	Heterocyclic compounds	C4H11NS	3	0.7326	4104-45-4	352898	308790	264722	1.62667e+06	1.77821e+06	1.73303e+06	1.2933
MW0001776	2-(2-Carboxyacetamido)benzoic acid	No result	No result	No result		No result		Benzene and substituted derivatives	Benzene and substituted derivatives	C10H9NO5	3	0.5986	53947-84-5	2.92325e+06	3.09146e+06	3.66666e+06	3.96745e+06	4.84423e+06	4.96564e+06	1.1373
MW0142383	Leucinic acid	10303-64-7 13748-90-8 138-52-3 20312-37-2 26671-68-1 498-36-2 6241-31-2	CHEBI:59783 CHEBI:32627	HMDB0000665	No result	No result	No result	Organic acid and Its derivatives	Organic acid and Its derivatives	C6H12O3	2	0.9553	498-36-2	1.4448e+06	1.40745e+06	1.31548e+06	41984.7	42772.4	41912.2	1.29979
MW0061622	[(1R,2S,3S,4S,6R,7S,10S,11R,16R,17R)-2,16,17-trihydroxy-7,11-dimethyl-6-[(1R)-1-[(2R)-5-methyl-6-oxo-4-[[(2R,3R,4S,5S,6R)-3,4,5-trihydroxy-6-(hydroxymethyl)oxan-2-yl]oxymethyl]-2,3-dihydropyran-2-yl]ethyl]-12-oxo-5-oxapentacyclo[8.8.0.02,7.04,6.011,16]octadec-13-en-3-yl] acetate							Amino acid and Its metabolites	polypeptide	C36H50O15	3	0.5551	-	778836	619282	719239	2.37792e+06	1.24653e+06	2.51268e+06	1.17974
MW0013385	LPC(O-16:0/2:0)							GP	LPC	C26H54NO7P	3	0.7079	74389-68-7	4.53374e+06	4.44516e+06	3.97059e+06	2.83581e+06	3.09999e+06	3.02123e+06	1.25563
MEDP1464	1,3-Diphenylguanidine	102-06-7 55556-10-0 5711-18-2 73240-92-3	No result	No result	No result	No result	SR-01000638639-1	Alcohol and amines	Polyamines	C13H13N3	3	0.598	102-06-7	1.01533e+06	832948	3.09757e+06	358865	335204	280924	1.12749
MW0159128	Val-Phe-Pro-Phe-Gln	No result	No result	No result	No result	No result	No result	Amino acid and Its metabolites	Small Peptide	C33H44N6O7	3	0.6601	-	2.34969e+06	2.27641e+06	2.02751e+06	839181	926429	924427	1.29012
MW0119768	4-Quinolone-3-Carboxamide CB2 Ligand	No result	No result	No result	No result	No result	No result	Alcohol and amines	Amines	C26H34N2O3	3	0.7134	-	1.96463e+06	1.86503e+06	1.71744e+06	494244	567104	547335	1.29427
MW0152424	Leu-Lys-Tyr	No result	No result	No result	No result	No result	No result	Amino acid and Its metabolites	Small Peptide	C21H34N4O5	3	0.7181	-	2.12221e+06	2.01359e+06	1.60635e+06	495874	691002	619314	1.26795
MW0157289	Sulfamoyldapsone	17615-73-5 32764-46-8	CHEBI:81723	No result	C18387	No result	No result	Benzene and substituted derivatives	Benzene and substituted derivatives	C12H13N3O4S2	3	0.5179	17615-73-5	2.07747e+06	1.06858e+06	1.82978e+06	248403	277924	543671	1.20324
MW0155315	Phe-Pro-Ile							Amino acid and Its metabolites	Small Peptide	C20H29N3O4	3	0.8042	-	2.83555e+06	1.50489e+06	1.47755e+06	543118	270139	1.12439e+06	1.03402
MW0158133	Trp-Gln-Ile							Amino acid and Its metabolites	Small Peptide	C22H31N5O5	3	0.8344	-	2.07576e+06	1.95986e+06	1.83947e+06	606383	731288	679630	1.29015
MW0152284	Leu-Gln-Asn-Arg	No result	No result	No result	No result	No result	No result	Amino acid and Its metabolites	Small Peptide	C21H39N9O7	3	0.8831	-	2.60487e+06	2.69835e+06	2.53341e+06	1.32187e+06	1.29315e+06	1.36664e+06	1.29671
FDATN01430	Dihydrostreptomycin sulfate	5490-27-7 5490-27-7	No result	No result	D02512	No result	No result	Others	Medicine	C42H88N14O36S3	3	0.5105	5490-27-7	1.83916e+06	1.82467e+06	1.74271e+06	342468	613403	625655	1.23897
MW0145900	Asn-Thr-Gln-Glu	No result	No result	No result	No result	No result	No result	Amino acid and Its metabolites	Small Peptide	C18H30N6O10	3	0.8952	-	1.39074e+06	1.52241e+06	1.50716e+06	278249	133490	197732	1.2728
MW0145460	Arg-Phe-Asp							Amino acid and Its metabolites	Small Peptide	C19H28N6O6	3	0.8848	-	1.88762e+06	1.66373e+06	1.57061e+06	446029	356800	533782	1.27758
MW0149782	Gln-Phe-Leu-Glu	No result	No result	No result	No result	No result	No result	Amino acid and Its metabolites	Small Peptide	C25H37N5O8	3	0.5552	-	1.82848e+06	1.9822e+06	1.69078e+06	631138	620082	517229	1.288
MEDL02151	3'-Adenylic acid							Nucleotide and Its metabolites	Nucleotide and Its metabolites	C10H14N5O7P	2	0.9229	84-21-9	32275.7	159172	132807	1.14341e+06	1.38587e+06	1.42803e+06	1.21713
MW0124447	Isatin	1186480-61-4 61-71-2 84788-92-1 91-56-5	CHEBI:27539	HMDB0061933	C11129	No result	No result	Heterocyclic compounds	Indole and Its derivatives	C8H5NO2	3	0.683	91-56-5	2.87774e+06	2.69279e+06	2.49035e+06	1.55862e+06	1.63011e+06	1.25948e+06	1.24542
MW0153215	Lys-Abu-OH	No result	No result	No result	No result	No result	No result	Amino acid and Its metabolites	Small Peptide	C15H21N3O6	3	0.7582	-	1.76591e+06	1.79544e+06	1.64563e+06	516888	568518	520913	1.29673
MW0159227	Val-Tyr-Ser-Lys	No result	No result	No result	No result	No result	No result	Amino acid and Its metabolites	Small Peptide	C23H37N5O7	3	0.7711	-	1.91458e+06	1.87472e+06	1.79853e+06	644356	707201	692865	1.29682
MW0137425	Ascomycin	104987-12-4 104987-12-4 11011-38-4	CHEBI:29582	No result	C12102	BSPBio_001318 IDI1_033788	No result	Others	Medicine	C43H69NO12	3	0.5288	104987-12-4 | 11011-38-4	1.3453e+06	1.56967e+06	1.42791e+06	161059	312986	373316	1.24132
MW0150465	Gly-Pro-Gly							Amino acid and Its metabolites	Small Peptide	C9H15N3O4	3	0.8788	2441-63-6	2.23452e+06	1.98142e+06	1.63639e+06	2.79853e+06	3.25327e+06	3.28753e+06	1.18919
MW0139585	Rifampicin	13292-46-1 13292-46-1	CHEBI:28077 CHEBI:71365	No result	C06688 D00211	BPBio1_000561 BSPBio_000509 Prestwick2_000525 Prestwick3_000525 Spectrum5_002018	No result	Heterocyclic compounds	Heterocyclic compounds	C43H58N4O12	3	0.5038	13292-46-1	1.66645e+06	2.28856e+06	1.71247e+06	599926	940637	645470	1.22259
MEDP1322	LPC(22:5/0:0)							GP	LPC	C30H52NO7P	3	0.7569	-	4.06685e+06	3.85637e+06	3.51262e+06	2523721	2.75883e+06	2.68874e+06	1.25154
MEDP1585	Alanine glutamate	13187-90-1 13286-90-3	CHEBI:61565	No result	No result	No result	No result	Amino acid and Its metabolites	Small Peptide	C8H14N2O5	3	0.7326	13187-90-1	3.26031e+06	3.16144e+06	2.76962e+06	1.82747e+06	1.93664e+06	1.96904e+06	1.26581
MW0016349	Canesceol	No result	No result	HMDB0034084	No result	No result	No result	Alcohol and amines	Alcohols	C29H44O11	3	0.6623	82228-15-7	1.82659e+06	1.79542e+06	1.69572e+06	591156	637109	644681	1.29683
MW0063408	Saikosaponin A	20736-09-8 2363-97-5 20736-09-8	CHEBI:8996	No result	C08975	No result	No result	Terpenoids	Terpenoids	C42H68O13	3	0.6043	20736-09-8	1.91633e+06	1.855e+06	1.66383e+06	620656	712571	657643	1.29096
MW0144509	Ala-Asp-Asn-Val-Lys	No result	No result	No result	No result	No result	No result	Amino acid and Its metabolites	Small Peptide	C22H39N7O9	3	0.7697	-	1.4905e+06	1.53266e+06	1.25808e+06	275523	284984	296478	1.29571
MW0156567	Scillarenin	465-22-5	CHEBI:38248	No result	No result	No result	No result	Steroids	Steroid	C24H32O4	3	0.7617	465-22-5	2.64413e+06	2.51406e+06	2.33737e+06	1.32468e+06	1.39977e+06	1.37075e+06	1.28904
MW0146600	Benzoyl cyanide							Benzene and substituted derivatives	Benzene and substituted derivatives	C8H5NO	2	0.9089	613-90-1	185026	166775	162673	1.21895e+06	1.33251e+06	1.29866e+06	1.29858
MW0158543	Tyr-Lys-Leu	No result	No result	No result	No result	No result	No result	Amino acid and Its metabolites	Small Peptide	C21H34N4O5	3	0.6495	-	1.74436e+06	1.68584e+06	1.03128e+06	351759	403783	404589	1.25628
MW0149121	Falaconitine	62926-57-2	CHEBI:4970	No result	C08683	No result	No result	Benzene and substituted derivatives	Benzene and substituted derivatives	C34H47NO10	3	0.7304	62926-57-2	1.62898e+06	1.58933e+06	1.50793e+06	531739	315542	583911	1.2413
MW0151145	His-Val-Gln-Arg							Amino acid and Its metabolites	Small Peptide	C22H38N10O6	3	0.783	-	1.92919e+06	1.82056e+06	1.63729e+06	2.79829e+06	3.01445e+06	2.86841e+06	1.26955
MW0000101	Codeine methyl ether	2859-16-7	No result	No result	No result	No result	No result	Alkaloids	Isoquinoline alkaloids	C19H23NO3	3	0.848	2859-16-7	2.19844e+06	2.15965e+06	1.46054e+06	822232	848794	861699	1.23515
MW0054771	[(2R,3R,4R,5R,6S,7S,8R,13R,14R,16S,17S,18R)-8-acetyloxy-5,7,14-trihydroxy-6,16,18-trimethoxy-13-(methoxymethyl)-11-methyl-11-azahexacyclo[7.7.2.12,5.01,10.03,8.013,17]nonadecan-4-yl] benzoate							Alkaloids	Terpenoid alkaloids	C33H45NO11	3	0.6956	2752-64-9	2850401	2.72878e+06	2.45586e+06	1.54786e+06	1.64432e+06	1593223	1.27845
MW0170017	Xanthine	16819-86-6 28522-58-9 51953-26-5 69-89-6 70805-82-2	CHEBI:17712 CHEBI:48517	HMDB0000292	C00385	MolMap_000070 Oprea1_474175	No result	Nucleotide and Its metabolites	Nucleotide and Its metabolites	C5H4N4O2	2	0.976	69-89-6	1.77093e+06	1.56795e+06	1.33134e+06	459532	484573	484789	1.28687
MW0157672	Thr-His-Tyr-Arg	No result	No result	No result	No result	No result	No result	Amino acid and Its metabolites	Small Peptide	C25H37N9O7	3	0.809	-	1.52724e+06	1.50113e+06	1.47993e+06	409493	545329	362243	1.2754
MW0055075	Mitomycin	1404-00-8 144085-53-0 50-07-7	CHEBI:27504	HMDB0014450	C06681 D00208	BSPBio_001267 Bio1_000213 Bio1_000702 Bio1_001191 Bio2_000464 Bio2_000944 CBiol_001927 IDI1_002219 SMP1_000307	No result	Heterocyclic compounds	Heterocyclic compounds	C15H18N4O5	3	0.6853	-	2.27335e+06	2.17721e+06	2.37581e+06	1.19855e+06	1.1883e+06	1.25539e+06	1.29378
MW0114348	Doxorubicin-semiquinone							Aldehyde,Ketones,Esters	Ketones	C27H33NO11	3	0.5778	-	1.44701e+06	1.04954e+06	1.31969e+06	169094	169453	306001	1.26321
MW0152395	Leu-Leu-Glu-Ser-Asp	No result	No result	No result	No result	No result	No result	Amino acid and Its metabolites	Small Peptide	C24H41N5O11	3	0.7674	-	2.07662e+06	1858755	1.58682e+06	627741	905069	870177	1.23226
MW0117304	1-Pyrroline-4-hydroxy-2-carboxylate	9054-77-7	CHEBI:16352	HMDB0002234	C04282	No result	No result	Heterocyclic compounds	Heterocyclic compounds	C5H7NO3	2	0.9514	9054-77-7	3.43967e+06	3.48305e+06	3.603e+06	2.44394e+06	2.54156e+06	2.4428e+06	1.29179
MW0105639	Apicidin	183506-66-3 1218779-89-5	No result	No result	No result	No result	No result	Heterocyclic compounds	Heterocyclic compounds	C34H49N5O6	3	0.7538	-	1.31395e+06	1.79471e+06	1.62193e+06	506328	822630	321828	1.15611
MW0151588	Ile-Ser-Val-Asp	No result	No result	No result	No result	No result	No result	Amino acid and Its metabolites	Small Peptide	C18H32N4O8	3	0.6808	-	1.44385e+06	1.4787e+06	1.44671e+06	457677	425010	458993	1.29882
MW0106371	Deferoxamine	1950-39-6 70-51-9	CHEBI:4356	HMDB0014884	C06940 D03670	BPBio1_000716 BSPBio_000650 BSPBio_002131 IDI1_000082 Prestwick2_000725 Prestwick3_000725 SMP2_000121 Spectrum5_000827 cMAP_000047	No result	Amino acid and Its metabolites	Small Peptide	C25H48N6O8	3	0.6694	70-51-9	1.49803e+06	1.51928e+06	1.11896e+06	313196	413285	386169	1.27468
MW0142428	alpha-(Hydroxymethyl)serine	17149-11-0	CHEBI:28187	No result	C03059	No result	No result	Organic acid and Its derivatives	Organic acid and Its derivatives	C4H9NO4	3	0.7317	17149-11-0	3.33063e+06	3.20049e+06	2.97004e+06	2.06921e+06	2.13088e+06	2.27977e+06	1.26653
MW0106127	Ceanothine D	No result	No result	HMDB0029341	No result	No result	No result	Amino acid and Its metabolites	Small Peptide	C27H40N4O4	3	0.7403	5574-24-3	1.48632e+06	1.25601e+06	1.17436e+06	268520	326938	301082	1.29004
MW0159240	Val-Val-His-Ala-Glu				No result			Amino acid and Its metabolites	Small Peptide	C24H39N7O8	3	0.7068	-	2.67357e+06	2.40289e+06	2.05002e+06	3.03311e+06	3.58681e+06	3.52552e+06	1.15104
MW0155169	Phe-Gln-Thr-Lys	No result	No result	No result	No result	No result	No result	Amino acid and Its metabolites	Small Peptide	C24H38N6O7	3	0.6955	-	2.08583e+06	1.96212e+06	1.91581e+06	962811	996345	986967	1.29604
MEDP1869	His-Leu	7763-65-7	CHEBI:5729	No result	C05010	No result	No result	Amino acid and Its metabolites	Small Peptide	C12H20N4O3	2	0.9122	7763-65-7	3.47319e+06	3.24289e+06	2.5827e+06	1.88481e+06	2.26416e+06	2.13724e+06	1.1427
MW0105105	H-His(pi-Me)-OH	163750-76-3 332-80-9 368-16-1 3705-21-3	CHEBI:70959	No result	No result	No result	No result	Amino acid and Its metabolites	Amino acid derivatives	C7H11N3O2	3	0.5687	-	1.84755e+06	1.83685e+06	1.75928e+06	804233	832020	797818	1.2983
MW0154136	N1,N5,N10-tricaffeoyl spermidine	No result	CHEBI:81478	No result	C18070	No result	No result	Heterocyclic compounds	Heterocyclic compounds	C34H37N3O9	3	0.7033	-	1.16445e+06	1.14903e+06	1.01873e+06	66696.1	86732.3	189605	1.25552
MW0105958	Asp-Leu	3062-14-4	CHEBI:68596	HMDB0028757	No result	No result	No result	Amino acid and Its metabolites	Small Peptide	C10H18N2O5	2	0.9341	-	1.49562e+06	1.73735e+06	1.74706e+06	754673	802397	451993	1.20554
MW0193946	L-Tryptophan	73-22-3 80206-30-0	CHEBI:16828 CHEBI:57912	HMDB0000929	C00078 D00020	IDI1_000457 Lopac0_001183	No result	Amino acid and Its metabolites	Amino acids	C11H12N2O2	2	0.9457	73-22-3	4.34219e+06	4.31187e+06	4.22652e+06	5.30899e+06	5.17049e+06	5.32151e+06	1.29021
MW0000006	Hyoscyamine	101-31-5 51-55-8 13269-35-7 4438-22-6 5908-99-6 620-61-1 83036-83-3	No result	No result	No result	BPBio1_000386 BSPBio_000350 BSPBio_001874 IDI1_000558 Lopac0_000042 Lopac0_000567 Oprea1_442738 Prestwick2_000565 Prestwick3_000565 SMP1_000031 Spectrum5_000545	No result	Alkaloids	Tropan alkaloids	C17H23NO3	3	0.592	101-31-5	2.34389e+06	2.28926e+06	2.20135e+06	1.24324e+06	1.36494e+06	1.30815e+06	1.29076
MW0103478	Adenosine monophosphate							Nucleotide and Its metabolites	Nucleotide and Its metabolites	C10H14N5O7P	2	0.9059	61-19-8	1312.64	4271.2	3329.6	885354	1.05642e+06	963651	1.29046
MW0156056	Pro-Val-Tyr							Amino acid and Its metabolites	Small Peptide	C19H27N3O5	3	0.8192	-	1.17171e+06	1.08803e+06	1.02799e+06	167114	208830	32462.7	1.1629
MW0122512	7-methyl-2-morpholino-9-(1-(phenylamino)ethyl)-4H-pyrido[1,2-a]pyrimidin-4-one							Aldehyde,Ketones,Esters	Ketones	C21H24N4O2	3	0.59	663619-89-4	1.43446e+06	1.53232e+06	889330	327362	368210	285778	1.25305
MW0152990	Lys-His-Ile-Glu-Glu	No result	No result	No result	No result	No result	No result	Amino acid and Its metabolites	Small Peptide	C28H46N8O10	2	0.9146	-	3.34971e+06	3.10381e+06	2.91546e+06	3.89609e+06	4.20843e+06	4.1304e+06	1.22877
MW0057050	1-[(9Z,12Z)-octadecadienoyl]-2-hexadecanoyl-sn-glycero-3-phosphocholine							GP	PC	C42H80NO8P	3	0.5103	-	419964	453394	56346.2	864884	1.42114e+06	1.50752e+06	1.00438
MW0139812	Thalsimine	5525-36-0 556-70-7	CHEBI:9515	No result	C09661	No result	No result	Heterocyclic compounds	Heterocyclic compounds	C38H40N2O7	3	0.6414	5525-36-0	957490	973095	1.11771e+06	31695	33990.8	121637	1.24677
MW0107766	H-Leu-val-OH	13588-95-9	CHEBI:73579	No result	No result	No result	No result	Amino acid and Its metabolites	Small Peptide	C11H22N2O3	3	0.7063	13588-95-9	2.17276e+06	1.85519e+06	1.68785e+06	885200	1.01198e+06	982932	1.26183
MW0148172	N-Deacetylcolchicine	3476-50-4	CHEBI:80676	No result	C16712	No result	No result	Alkaloids	Alkaloids	C20H23NO5	3	0.8346	3476-50-4	1.74897e+06	2.49924e+06	1.81633e+06	951148	1.32536e+06	953808	1.16056
MW0105132	2-Amino-3-phosphonopropionic acid	128241-72-5 20263-06-3 23052-80-4 5652-28-8 8057-25-8	No result	HMDB0000370	C05672	Lopac0_000067	No result	Organic acid and Its derivatives	Organic acid and Its derivatives	C3H8NO5P	3	0.6185	5652-28-8	1.01539e+06	987724	1.00954e+06	39555.5	60755.1	91502.2	1.28046
MW0107807	Leucylvaline	13588-95-9 35436-83-0 72121-02-9 76248-09-4	No result	HMDB0028942	No result	No result	No result	Amino acid and Its metabolites	Small Peptide	C11H22N2O3	2	0.9646	-	2.02653e+06	2.00006e+06	1.74529e+06	951634	1.0232e+06	998023	1.28393
MW0138237	Geldanamycin	30562-34-6 30562-34-6	CHEBI:5292	No result	C11222	BSPBio_001073 IDI1_002122 SMP1_000132	No result	Heterocyclic compounds	Heterocyclic compounds	C29H40N2O9	3	0.762	30562-34-6	1.79966e+06	1.8655e+06	1.7407e+06	952240	792930	874152	1.28528
MW0115374	Tomelukast	88107-10-2 94088-09-2	CHEBI:75310	No result	D02851	BSPBio_001402 BSPBio_003516 Bio1_000198 Bio1_000687 Bio1_001176 Bio2_000122 Bio2_000602 CBiol_001912 IDI1_033872 Spectrum5_001969 Spectrum5_002024	No result	Heterocyclic compounds	Heterocyclic compounds	C16H22N4O3	3	0.6269	88107-10-2	1.54997e+06	1.50786e+06	1.38985e+06	531203	585569	578447	1.29416
MW0110209	Tyr-Lys	No result	CHEBI:75004	No result	No result	No result	No result	Amino acid and Its metabolites	Small Peptide	C15H23N3O4	3	0.7891	54925-88-1	1.35599e+06	1.26869e+06	1.30177e+06	414673	467614	371265	1.29036
MW0146407	Atractyloside B	No result	No result	No result	C17859	No result	No result	Steroids	Steroid	C21H38O10	3	0.6374	-	1.4441e+06	1.38001e+06	1.22949e+06	427465	485363	475422	1.29111
MW0157775	Thr-Pro-Ala							Amino acid and Its metabolites	Small Peptide	C12H21N3O5	3	0.5632	-	2.02021e+06	2.00143e+06	1.93601e+06	1.06338e+06	1.13386e+06	1.11232e+06	1.29574
MW0151101	His-Thr-Phe-Cys-Ala	No result	No result	No result	No result	No result	No result	Amino acid and Its metabolites	Small Peptide	C25H35N7O7S	3	0.7612	-	1.51029e+06	1.51151e+06	1.37136e+06	590878	586238	612660	1.29611
MW0130305	2-(6-{2,4-dihydroxy-3-[(1E)-3-methylbut-1-en-1-yl]benzoyl}-5-(2,4-dihydroxyphenyl)-5-hydroxy-3-methylcyclohex-2-en-1-yl)benzene-1,3-diol							Benzene and substituted derivatives	Benzene and substituted derivatives	C31H32O8	3	0.5768	-	1.10137e+06	974439	957057	128443	151099	161678	1.29513
MW0062155	Epoxideoxycorticosterone acetate	21853-83-8 24956-48-7	CHEBI:34170	No result	C14651	No result	No result	Hormones and hormone related compounds	Hormones and hormone related compounds	C23H30O5	3	0.6622	21853-83-8	1.15036e+06	1.02006e+06	610544	96211.5	63733.6	42320.8	1.26716
MW0055430	1-Octen-3-yl primeveroside	No result	No result	HMDB0032960	No result	ACon1_000391 MEGxp0_000231	No result	Others	Others	C19H34O10	3	0.7145	209863-01-4	1.56641e+06	1.12465e+06	1.21243e+06	444726	452190	445374	1.27729
MW0009652	Ranolazine	142387-99-3 95635-55-5 95635-56-6	No result	HMDB0014388	D05700	BSPBio_002276 Lopac0_001062	No result	Benzene and substituted derivatives	Phenolics	C24H33N3O4	2	0.8684	95635-55-5 | 142387-99-3 | 110445-25-5	1.27934e+06	1.20077e+06	1.0332e+06	299508	340229	327554	1.29137
MW0150031	Glu-Ile-Ala-His-Gly	No result	No result	No result	No result	No result	No result	Amino acid and Its metabolites	Small Peptide	C22H35N7O8	2	0.9154	-	1.83964e+06	1.67617e+06	1.3756e+06	694855	848382	815207	1.24815
MW0157859	Thr-Val-Glu-Thr-Trp	No result	No result	No result	No result	No result	No result	Amino acid and Its metabolites	Small Peptide	C29H42N6O10	3	0.7643	-	1.17689e+06	1.19242e+06	1.31836e+06	417453	480415	276741	1.24846
MW0145258	Arg-Arg-Asn							Amino acid and Its metabolites	Small Peptide	C16H32N10O5	3	0.7553	-	1.35643e+06	1.32107e+06	1.23903e+06	455255	495401	456170	1.29614
FDATN01375	Dorzolamide hydrochloride							Others	Medicine	C10H17ClN2O4S3	3	0.6017	130693-82-2	17450.2	25920.8	489767	1.0458e+06	969052	1.02438e+06	1.04254
MW0147352	12-Hydroxy-2-[(5-hydroxy-3,4-dimethoxy-6-methyloxan-2-yl)oxymethyl]-9-(3-hydroxy-4-methoxy-6-methyloxan-2-yl)oxy-3,8,10,12-tetramethyl-4,17-dioxabicyclo[14.1.0]heptadeca-6,14-diene-5,13-dione							Heterocyclic compounds	Heterocyclic compounds	C35H56O14	3	0.5461	20283-48-1	2.72263e+06	2.67689e+06	2.45923e+06	3.32478e+06	3.55746e+06	3.47194e+06	1.25564
MW0054028	Ipecoside	15401-60-2	CHEBI:5952	No result	C09464	ACon0_000909 ACon1_000420 MEGxp0_001513	No result	Aldehyde,Ketones,Esters	Esters	C27H35NO12	3	0.5614	15401-60-2	823893	1.50554e+06	1.01155e+06	261034	326125	277736	1.24944
MW0157547	Thr-Arg-Glu-Glu-Lys	No result	No result	No result	No result	No result	No result	Amino acid and Its metabolites	Small Peptide	C26H47N9O11	3	0.7306	-	1.32986e+06	1.4453e+06	710924	265309	269510	527503	1.14758
MW0194041	Anaprel	24815-24-5	CHEBI:28572	No result	C06540 D00198	ACon1_002115 BPBio1_000392 BSPBio_000356 MEGxp0_001952 Prestwick2_000568 Prestwick3_000568	No result	Alkaloids	Alkaloids	C35H42N2O9	3	0.7511	24815-24-5	1.27251e+06	1.01869e+06	1.04261e+06	312316	406177	198772	1.23364
MW0158992	Val-Glu-Leu-Asp-Asn	No result	No result	No result	No result	No result	No result	Amino acid and Its metabolites	Small Peptide	C24H40N6O11	3	0.8539	-	1.65677e+06	1.69127e+06	1.44976e+06	707106	714510	983788	1.231
MW0119311	3-[1-[3-(Dimethylamino)propyl]-5-methoxy-1H-indol-3-yl]-4-(1H-indol-3-yl)-1H-pyrrole-2,5-dione							Aldehyde,Ketones,Esters	Ketones	C26H26N4O3	3	0.8859	-	2.20694e+06	2.17889e+06	2.05328e+06	1.29379e+06	1.41678e+06	1.35728e+06	1.28522
MW0155907	Pro-Leu-Asp							Amino acid and Its metabolites	Small Peptide	C15H25N3O6	3	0.8084	-	1.14112e+06	872966	743620	85564.8	172375	174939	1.24985
MW0154706	O-Demethylpuromycin	No result	CHEBI:17161	No result	C02864	No result	No result	Nucleotide and Its metabolites	Nucleotide and Its metabolites	C21H27N7O5	3	0.6408	-	1.28666e+06	1.07261e+06	1.14304e+06	466302	452461	268623	1.23242
MW0155179	Phe-Glu-His-Phe-Leu	No result	No result	No result	No result	No result	No result	Amino acid and Its metabolites	Small Peptide	C35H45N7O8	3	0.7573	-	1.13083e+06	1.05554e+06	962179	277957	337529	235409	1.2807
MW0145672	Asn-Arg-Glu-Ser-Leu	No result	No result	No result	No result	No result	No result	Amino acid and Its metabolites	Small Peptide	C24H43N9O10	2	0.9143	-	2.78598e+06	2.49198e+06	2.15327e+06	2.99276e+06	3.40903e+06	3.31476e+06	1.10496
MW0003096	2-Hydroxy-3,4-dimethoxybenzoic acid							Benzene and substituted derivatives	Benzene and substituted derivatives	C9H10O5	3	0.633	5653-46-3	122521	73668	131799	1.13029e+06	1.31277e+06	152702	1.00485
MW0150804	Hippeastrine	477-17-8	CHEBI:5724	No result	C08528	BPBio1_000847 BSPBio_000769 Prestwick3_000675	No result	Alkaloids	Alkaloids	C17H17NO5	3	0.7764	477-17-8 | 22352-41-6	1.93356e+06	1.87166e+06	1.77796e+06	1.08726e+06	1.13001e+06	1.10444e+06	1.29299
MW0052901	Desferal-iron(III)	No result	No result	No result	No result	No result	No result	Heterocyclic compounds	Heterocyclic compounds	C25H48FeN6O8	3	0.6501	14836-73-8	1.06823e+06	556405	969078	135275	153233	53022.6	1.21724
MW0149372	N-Demethylconoduramine B640243K425	66086-99-5	No result	No result	No result	No result	No result	Alkaloids	Alkaloids	C42H50N4O5	3	0.6161	66086-99-5	1.71887e+06	1.21409e+06	930901	437317	617598	561503	1.17017
ZINC56556	1-(Isopropylamino)-3-(1-naphthyloxy)-2-propanol	4199-09-1 4396-01-4	No result	No result	No result	BCBcMAP01_000208 BPBio1_001200 BPBio1_001236 BSPBio_001040 BSPBio_001090 BSPBio_001122 Bio2_000360 Bio2_000840 IDI1_002115 Lopac0_001023 PDSP1_000768 PDSP2_000756 Prestwick2_001081 Prestwick3_001075 Prestwick3_001081	No result	Benzene and substituted derivatives	Benzene and substituted derivatives	C16H21NO2	3	0.7026	-	1484108	1.3763e+06	1.38521e+06	592224	770964	635590	1.26948
MW0147881	Curcumin diglucoside	No result	CHEBI:81315	No result	C17750	No result	No result	Steroids	Steroid	C33H40O16	3	0.6503	-	1.03365e+06	887323	913177	212651	128791	258638	1.25653
MW0103937	2-Undecyl-thiazolidine-4-carboxylic acid	298186-80-8	No result	No result	No result	No result	No result	Organic acid and Its derivatives	Organic acid and Its derivatives	C15H29NO2S	3	0.7967	298186-80-8	1.12058e+06	1.13409e+06	1.05952e+06	290091	400841	389736	1.27701
MW0155192	Phe-Glu-Val							Amino acid and Its metabolites	Small Peptide	C19H27N3O6	3	0.8272	-	1.04397e+06	1.0934e+06	916757	281990	235970	345256	1.27708
MW0155424	Phe4Cl-His-OH	No result	No result	No result	No result	No result	No result	Amino acid and Its metabolites	Small Peptide	C20H17ClN4O6	3	0.8841	-	1.00891e+06	1.02411e+06	1.0017e+06	261582	383868	247864	1.26836
MW0124506	Isorhynchophylline	1811243	CHEBI:70071	No result	C16980	No result	No result	Heterocyclic compounds	Heterocyclic compounds	C22H28N2O4	3	0.5883	1811243	1.33511e+06	1.23231e+06	1.21609e+06	558809	573628	517174	1.29325
MW0156747	Ser-Glu-Tyr-Glu	No result	No result	No result	No result	No result	No result	Amino acid and Its metabolites	Small Peptide	C22H30N4O11	3	0.7753	-	855345	805535	774752	73418.8	86334.9	149909	1.27267
MW0145574	Arg-Val-Thr							Amino acid and Its metabolites	Small Peptide	C15H30N6O5	3	0.8483	-	1.11286e+06	1.13693e+06	1.09738e+06	360801	451954	412322	1.28826
MW0155981	Pro-Pro-Phe	No result	No result	No result	No result	No result	No result	Amino acid and Its metabolites	Small Peptide	C19H25N3O4	3	0.7869	-	796903	756528	691290	67232	41774	43869.6	1.29195
MW0138231	Gangetin	No result	No result	No result	No result	No result	No result	Heterocyclic compounds	Heterocyclic compounds	C26H28O5	3	0.7363	32986-79-1	1.88758e+06	1.83639e+06	1.71664e+06	2.45801e+06	2.52506e+06	2.54448e+06	1.27825
MW0144865	Rhamnose	3615-41-6 39665-53-7	CHEBI:62346	HMDB0000849	C00507	No result	No result	Carbohydrates and Its metabolites	Sugars	C6H12O5	3	0.5679	3615-41-6	645140	655889	1.23478e+06	128129	166943	154143	1.25425
MW0150820	His-Ala-Leu-Glu	No result	No result	No result	No result	No result	No result	Amino acid and Its metabolites	Small Peptide	C20H32N6O7	3	0.6345	-	878184	1.0075e+06	944243	259861	250495	238194	1.29678
MW0158581	Tyr-Phe-Val-Arg	No result	No result	No result	No result	No result	No result	Amino acid and Its metabolites	Small Peptide	C29H41N7O6	3	0.8554	-	1.12206e+06	918227	885859	288451	290007	267716	1.28996
MW0155786	Pro-Arg-Trp							Amino acid and Its metabolites	Small Peptide	C22H31N7O4	3	0.7989	-	887170	942363	851718	170619	210083	222889	1.29096
MW0139426	Propafenone	107300-59-4 107381-31-7 107381-32-8 54063-53-5	CHEBI:63619	HMDB0015313	C07381 D08435	BCBcMAP01_000079 BPBio1_000437 BSPBio_000397 BSPBio_001465 BSPBio_003470 IDI1_000906 Lopac0_000919 Prestwick2_000499 Prestwick3_000499 Spectrum5_001271	No result	Aldehyde,Ketones,Esters	Ketones	C21H27NO3	3	0.6269	54063-53-5	1.85764e+06	1.67563e+06	1.60066e+06	953313	1.05968e+06	1.04561e+06	1.27096
MW0010586	(+)-Eudesmin	No result	No result	No result	No result	No result	No result	Lignans and Coumarins	Lignans	C22H26O6	3	0.7993	29106-36-3 | 526-06-7	1.04997e+06	1.00631e+06	1.1118e+06	342693	391337	363210	1.29422
MW0146553	Beiwutine							Benzene and substituted derivatives	Benzene and substituted derivatives	C33H45NO12	3	0.7218	76918-93-9	916114	882976	781600	133201	227365	156661	1.27322
MW0017110	NCGC00386033-01_C24H38O12_3-Buten-2-one, 4-[4-hydroxy-2,2,6-trimethyl-6-[[6-O-[(2S,3R,4R)-tetrahydro-3,4-dihydroxy-4-(hydroxymethyl)-2-furanyl]-beta-D-glucopyranosyl]oxy]cyclohexylidene]-							Alcohol and amines	Alcohols	C24H38O12	3	0.5522	108567-70-0	2.76106e+06	2.71827e+06	2.36472e+06	3.16846e+06	3.61081e+06	3.12719e+06	1.12688
MW0150773	Hetisine	10089-23-3 10089-23-3	CHEBI:5690	No result	C08687	No result	No result	Alcohol and amines	Alcohols	C20H27NO3	3	0.7504	10089-23-3	1.12438e+06	951542	865764	275015	307529	298554	1.28752
MW0015756	Aminocaproic acid	1319-82-0 4321-58-8 60-32-2 93208-38-9	CHEBI:16586 CHEBI:57826 CHEBI:78629 CHEBI:79212	HMDB0001901	C02378 D00160	BPBio1_001056 BSPBio_000960 CBDivE_004370 IDI1_000551 Lopac0_000082 Prestwick2_000960 Prestwick3_000960 Spectrum5_000780	No result	Amino acid and Its metabolites	Amino acid derivatives	C6H13NO2	2	0.9007	60-32-2	2.50164e+06	2.58831e+06	2.70312e+06	1.98184e+06	1.87917e+06	1.87432e+06	1.27779
MW0168358	NCGC00381206-01_C40H60O10_1-Naphthalenebutanoic acid, decahydro-beta,6-dihydroxy-alpha-(2-hydroxyethylidene)-5-(hydroxymethyl)-5,8a-dimethyl-2-methylene-, (4E)-4-[2-[(1R,4aS,5R,6R,8aS)-decahydro-6-hydroxy-5-(hydroxymethyl)-5,8a-dimethyl-2-methylene-1-naphthalenyl]ethylidene]tetrahydro-5-oxo-3-furanyl ester, (alphaE,1R,4aS,5R,6R,8aS)-							Aldehyde,Ketones,Esters	Esters	C40H60O10	3	0.611	-	1.01801e+06	877883	761435	161976	218562	220119	1.27975
MW0053772	Goshonoside F5	No result	No result	No result	No result	No result	No result	Benzene and substituted derivatives	Benzene and substituted derivatives	C32H54O13	3	0.5681	90851-28-8	1.15133e+06	857290	733617	241682	210270	234653	1.27463
MW0109320	Pro-leu	52899-07-7	CHEBI:74791	No result	No result	No result	No result	Amino acid and Its metabolites	Small Peptide	C11H20N2O3	2	0.9531	52899-07-7	1.12582e+06	1.10813e+06	992370	368565	400314	406720	1.29345
MW0142979	3-Hydroxyestra-1,3,5(10)-trien-17-one O-(carboxymethyl)oxime	No result	CHEBI:79930	No result	C15430	No result	No result	Aldehyde,Ketones,Esters	Ketones	C20H25NO4	3	0.7222	-	663469	942635	764440	116549	134656	70531.3	1.26996
MW0052907	Fevicordin B 2-gentiobioside	No result	No result	HMDB0035296	No result	No result	No result	Aldehyde,Ketones,Esters	Esters	C43H64O18	3	0.5241	151589-22-9	840411	800043	813191	345481	53502.7	6995.52	1.01267
MW0158655	Tyr-Tyr-Thr-Glu-Phe	No result	No result	No result	No result	No result	No result	Amino acid and Its metabolites	Small Peptide	C36H43N5O11	3	0.6757	-	885251	765346	778881	151860	155025	77566.2	1.26271
MW0150718	Hedamycin	11048-97-8 111793-41-0	No result	No result	C15759	No result	No result	Benzene and substituted derivatives	Benzene and substituted derivatives	C41H50N2O11	3	0.5865	11048-97-8	909144	845788	732411	122621	122203	199927	1.27438
MW0122812	AM2201 6-hydroxyindole metabolite	No result	No result	No result	No result	No result	No result	Aldehyde,Ketones,Esters	Ketones	C24H22FNO2	3	0.8383	-	1.0881e+06	588306	407591	14385	26715.6	8189.47	1.26513
MW0107567	Ile-Ile							Amino acid and Its metabolites	Small Peptide	C12H24N2O3	3	0.7064	42537-99-5	1.20462e+06	596668	1.05539e+06	1.57882e+06	1.63493e+06	1.65861e+06	1.04053
MW0169998	Vandetanib	338992-00-0 443913-73-3	CHEBI:49960	No result	D06407	No result	No result	Others	Medicine	C22H24BrFN4O2	3	0.7484	443913-73-3 | 338992-00-0	1.00247e+06	991794	1.84452e+06	463069	777712	593349	1.05813
MW0154595	Norbinaltorphimine	105618-26-6	CHEBI:81529	No result	C18130	Lopac0_000806 PDSP2_001420	No result	Alkaloids	Isoquinoline alkaloids	C40H43N3O6	3	0.7592	105618-26-6	1.28127e+06	1.26849e+06	1.12145e+06	572501	611705	507587	1.27972
MW0157012	L-Seryl-L-lysine	No result	No result	No result	No result	No result	No result	Amino acid and Its metabolites	Small Peptide	C9H19N3O4	3	0.7566	22677-61-8	837268	788746	550528	75145.2	78240	67213.2	1.2906
MW0154472	N-hexanoyl-L-Homoserine lactone-d3							Amino acid and Its metabolites	Amino acid derivatives	C10H14D3NO3	3	0.749	-	1.02889e+06	620519	434882	1.28688e+06	1.4015e+06	1.34351e+06	1.06656
MW0146546	Batrachotoxin							Heterocyclic compounds	Heterocyclic compounds	C31H42N2O6	3	0.7107	23509-16-2	661999	638080	578872	1.24011e+06	1.28921e+06	1.29484e+06	1.29084
MW0126856	Triamterene	396-01-0	No result	HMDB0001940	D00386	BPBio1_000141 BSPBio_000127 BSPBio_002924 IDI1_000433 Lopac0_001196 Oprea1_825704 Prestwick2_000034 Prestwick3_000034 SMP1_000147 Spectrum5_001034	No result	Heterocyclic compounds	Heterocyclic compounds	C12H11N7	3	0.641	396-01-0	1.32671e+06	1.16253e+06	1.0256e+06	654165	274232	644891	1.07677
MW0114029	Cadabicine methyl ether	No result	No result	No result	No result	No result	No result	Others	Others	C26H31N3O4	3	0.7272	-	984783	938899	840070	262918	286446	280287	1.29472
MW0143715	6-[(4Ar,8as)-octahydroquinolin-1(2h)-ylsulfonyl]-1,2,3,4-tetrahydroquinoline							Others	Others	C18H26N2O2S	3	0.7585	5455-90-3	1.23393e+06	1.13608e+06	893884	402114	467209	466503	1.26237
MW0114922	2-(Acetylamino)-4-O-[2-(acetylamino)-4-O-[2-(acetylamino)-2-deoxy-beta-D-glucopyranosyl]-2-deoxy-beta-D-glucopyranosyl]-2-deoxy-D-glucopyranose							Carbohydrates and Its metabolites	Sugars	C24H41N3O16	3	0.6088	-	796579	756323	602357	57427.6	106175	67910.5	1.27894
MW0152754	Lonchocarpenin	22263-56-5	CHEBI:6521	No result	C10491	No result	No result	Heterocyclic compounds	Heterocyclic compounds	C27H28O6	3	0.7016	22263-56-5	798381	986092	837204	232669	138827	347615	1.20656
MEDP1024	Leu-Val		No result	No result	No result			Amino acid and Its metabolites	Small Peptide	C11H22N2O3	2	0.9507	-	1.76773e+06	1.76433e+06	1.62726e+06	2.28629e+06	2.42766e+06	2.3313e+06	1.27284
MW0153392	Mansonone C	5574-34-5	CHEBI:6689	No result	C10371	No result	No result	Quinones	Quinones	C15H16O2	3	0.6986	5574-34-5	2.35477e+06	2.39121e+06	2.26972e+06	1.68842e+06	1.77311e+06	1.67024e+06	1.28464
MW0145386	Arg-Ile-Asp-Asp	No result	No result	No result	No result	No result	No result	Amino acid and Its metabolites	Small Peptide	C20H35N7O9	3	0.7241	-	813213	771714	702566	117470	118671	168151	1.28665
MW0109133	Phe-Thr	No result	CHEBI:73636	No result	No result	No result	No result	Amino acid and Its metabolites	Small Peptide	C13H18N2O4	3	0.8881	-	1.4674e+06	1.37332e+06	1.38143e+06	762027	808197	776633	1.29416
MW0003626	3,4-Dihydroxymandelic acid	14883-87-5 775-01-9 82016-55-5 14883-87-5	CHEBI:27637 CHEBI:53326	HMDB0001866	C05580	No result	No result	Benzene and substituted derivatives	Phenolics	C8H8O5	3	0.788	775-01-9	884298	843370	355604	54320.5	104542	50251.3	1.23409
MW0158052	Tridihexethyl bromide	No result	CHEBI:9702	No result	C11761	No result	No result	Alcohol and amines	Amines	C21H36BrNO	3	0.8116	-	935352	920789	845345	274895	276420	276529	1.29818
MW0144428	AGC	No result	No result	No result	No result	BSPBio_001521 IDI1_033991 Spectrum5_001963	No result	Nucleotide and Its metabolites	Nucleotide and Its metabolites	C15H25NO3S	3	0.7914	-	1.42379e+06	1.3967e+06	1.4757e+06	974545	727466	721170	1.23068
MW0114531	Glucobrassicanapin	19041-10-2 19041-10-2	CHEBI:79318	No result	C08403	No result	No result	Organic acid and Its derivatives	Organic acid and Its derivatives	C12H21NO9S2	3	0.7481	19041-10-2	1.06718e+06	869638	938867	325202	329439	349392	1.29051
MW0109259	(R)-3-Amino-4-(3-hexylphenylamino)-4-oxobutylphosphonic acid							Others	Others	C16H27N2O4P	3	0.7431	909725-61-7	1.0986e+06	1.11977e+06	1.05838e+06	1.55976e+06	1.71104e+06	1.86195e+06	1.26454
MW0150008	Glu-Gly-Gln-Arg-Val	No result	No result	No result	No result	No result	No result	Amino acid and Its metabolites	Small Peptide	C23H41N9O9	3	0.8747	-	1.11513e+06	1.0931e+06	982330	411931	459037	470715	1.28865
MW0155873	Pro-Gly-Val							Amino acid and Its metabolites	Small Peptide	C12H21N3O4	3	0.8789	-	1.9127e+06	1.67629e+06	1.34057e+06	889504	1.14963e+06	1.05275e+06	1.13567
MW0106033	beta-D-Glucosyloxydestruxin B							Heterocyclic compounds	Heterocyclic compounds	C36H61N5O13	3	0.5392	-	950524	968483	846890	1.52339e+06	1.56819e+06	1.47386e+06	1.27888
MW0152904	Lys-Asp-Leu-Glu	No result	No result	No result	No result	No result	No result	Amino acid and Its metabolites	Small Peptide	C21H37N5O9	3	0.6277	-	1.96171e+06	2.27336e+06	1.48027e+06	1.18541e+06	1.50839e+06	1.22584e+06	1.0153
MEDN1780	Pseudolaric acid B							Organic acid and Its derivatives	Organic acid and Its derivatives	C23H28O8	1b	0.7118	82508-31-4	41745.9	40302.4	37419.4	601396	657995	646325	1.2994
MW0115432	Troleandomycin	311074	No result	HMDB0015448	C12753 D01322	BPBio1_000145 BSPBio_000131 Prestwick3_000036	No result	Heterocyclic compounds	Heterocyclic compounds	C41H67NO15	3	0.7396	311074	788502	734244	689328	125850	153310	149637	1.29451
MW0158826	Urdamycin G	115626-67-0	CHEBI:32282	No result	C12414	No result	No result	Benzene and substituted derivatives	Benzene and substituted derivatives	C37H46O14	3	0.7087	115626-67-0	800948	779101	657726	131657	134017	190085	1.28194
MW0110349	Val-Ile							Amino acid and Its metabolites	Small Peptide	C11H22N2O3	3	0.8964	20556-14-3	1.11825e+06	1.06261e+06	948301	1.35959e+06	2.08563e+06	1.45911e+06	1.09132
MW0107687	S-Glutathionyl-L-cysteine	No result	CHEBI:21264 CHEBI:8959	No result	C05526	No result	No result	Amino acid and Its metabolites	Small Peptide	C13H22N4O8S2	3	0.6414	-	1.14707e+06	776923	637524	249982	276093	264894	1.24351
MEDP1593	S-Lactoylglutathione	25138-66-3 25642-75-5 54398-03-7	CHEBI:15694	HMDB0001066	C03451	No result	No result	Organic acid and Its derivatives	Organic acid and Its derivatives	C13H21N3O8S	3	0.6674	25138-66-3	1.06741e+06	745051	1.03399e+06	187341	238181	651352	1.05603
MW0145457	Arg-Phe-Ala	No result	No result	No result	No result	No result	No result	Amino acid and Its metabolites	Small Peptide	C18H28N6O4	3	0.7522	-	1066642	1.03525e+06	1.00593e+06	440732	431237	467852	1.29682
MW0114386	(Z)-Syringin	No result	No result	No result	No result	No result	No result	Benzene and substituted derivatives	Benzene and substituted derivatives	C17H24O9	3	0.6091	-	699213	668080	598144	10401	168241	21348.9	1.13106
MEDP1667	Phe-Glu							Amino acid and Its metabolites	Small Peptide	C14H18N2O5	2	0.9299	3617-45-6	997254	893954	1.12352e+06	1.50337e+06	1.68052e+06	1.59618e+06	1.2404
MW0156669	Ser-Asn-Thr-Ile-Leu	No result	No result	No result	No result	No result	No result	Amino acid and Its metabolites	Small Peptide	C23H42N6O9	3	0.7625	-	857822	768006	775538	226598	226537	197200	1.29498
MW0156568	Scilliroside	28932-86-7 507-60-8	No result	No result	C08880	No result	No result	Others	Others	C32H44O12	3	0.5227	507-60-8	794116	595129	1.10328e+06	248592	374452	131919	1.13191
MW0157713	Thr-Leu-Thr-Gly-Lys	No result	No result	No result	No result	No result	No result	Amino acid and Its metabolites	Small Peptide	C22H42N6O8	3	0.6867	-	755620	787334	707408	180374	162765	184429	1.29715
MW0148148	DAN-1 EE	No result	No result	No result	No result	No result	No result	Aldehyde,Ketones,Esters	Esters	C20H20N2O2	3	0.7423	-	1.1077e+06	1.04456e+06	855592	409835	447861	431207	1.27584
MW0169318	Isofraxidin	486-21-5	CHEBI:81121	No result	C17480	No result	No result	Heterocyclic compounds	Heterocyclic compounds	C11H10O5	3	0.6153	486-21-5	1.09777e+06	1.22614e+06	1.52445e+06	1.60022e+06	1.95972e+06	1.99826e+06	1.0954
MW0156199	PtdIns-(5)-P1(1,2-dipalmitoyl)	No result	No result	No result	No result	No result	No result	Organic acid and Its derivatives	Sulfonic acids	C41H80O16P2	2	0.908	-	888944	919535	857225	317678	314358	328074	1.29856
MW0170020	Xanthosine	146-80-5 5968-90-1	CHEBI:18107	HMDB0000299	C01762	No result	No result	Nucleotide and Its metabolites	Nucleotide and Its metabolites	C10H12N4O6	2	0.9453	146-80-5	744316	695321	482957	67078.4	73966.9	77399.6	1.2891
MW0156780	Ser-His-Phe-Lys	No result	No result	No result	No result	No result	No result	Amino acid and Its metabolites	Small Peptide	C24H35N7O6	3	0.8596	-	675666	633159	639025	61800	69704.7	112651	1.2802
MW0149846	Gln-Tyr-Thr-Lys	No result	No result	No result	No result	No result	No result	Amino acid and Its metabolites	Small Peptide	C24H38N6O8	3	0.7498	-	1.95637e+06	1.80047e+06	1.72812e+06	2.21831e+06	2.59774e+06	2.37106e+06	1.19343
MW0007527	Lucidin		CHEBI:6554	No result	C10369	No result	No result	Benzene and substituted derivatives	Benzene and substituted derivatives	C15H10O5	3	0.6688	478-08-0	1.25959e+06	1.35349e+06	1.38411e+06	2.02426e+06	1.81288e+06	1.85883e+06	1.26108
MW0156068	(7E,9S,10S,11R,12R,13R,14R,15R,16S,17S,18E,20E)-2,10,12,14,16,26,28-heptahydroxy-3,7,9,11,13,15,17,21-octamethyl-23-azatricyclo[22.3.1.05,27]octacosa-1(28),5(27),7,18,20,23,25-heptaene-4,6,22-trione							Amino acid and Its metabolites	polypeptide	C35H47NO10	3	0.7074	246255-43-6	983196	923784	899272	418381	319224	378353	1.28041
MW0156374	Rhodamine 6G	989-38-8	No result	No result	No result	No result	No result	Benzene and substituted derivatives	Benzene and substituted derivatives	C28H31N2O3	3	0.6833	47724-48-1	1.06376e+06	1.11305e+06	973129	465393	533189	466981	1.28412
MW0145443	Arg-Lys-Thr							Amino acid and Its metabolites	Small Peptide	C16H33N7O5	3	0.623	-	768143	696392	620111	140762	132941	140655	1.29601
MW0104477	Damgo	78123-71-4	CHEBI:272	No result	C11318	No result	No result	Amino acid and Its metabolites	Small Peptide	C26H35N5O6	3	0.7139	78123-71-4 | 950492-85-0	1.00152e+06	948087	1.1685e+06	506038	397172	545598	1.24674
MEDN0338	DL-3-Phenyllactic acid	143489-45-6 156-05-8 20312-36-1 7326-19-4 828-01-3 87792-25-4	CHEBI:25998	HMDB0000779	No result	No result	No result	Organic acid and Its derivatives	Organic acid and Its derivatives	C9H10O3	2	0.9685	7326-19-4	1.33171e+06	1.29203e+06	1.18158e+06	685932	728559	723570	1.28706
MW0005393	5-(3-Carboxybenzoyl)-2-((6-(4-methoxyphenyl)-5-hexenyl)oxy)benzenepropanoic acid	117423-74-2	No result	No result	No result	PDSP1_000574 PDSP2_000572	No result	Benzene and substituted derivatives	Benzene and substituted derivatives	C30H30O7	2	0.8677	117423-74-2	719488	672260	614072	63426.6	205180	85978.8	1.21309
MW0155089	Phe-Arg-Gln							Amino acid and Its metabolites	Small Peptide	C20H31N7O5	3	0.7135	-	628778	595186	539338	29870.5	22327.8	81061	1.24966
MW0151650	Ile-Val-Leu-Glu	No result	No result	No result	No result	No result	No result	Amino acid and Its metabolites	Small Peptide	C22H40N4O7	2	0.9262	-	1.02256e+06	961221	926509	423021	434463	427822	1.29653
MW0133248	Hydrocinnamic acid	501-52-0 701-97-3	No result	HMDB0000764	C05629	No result	No result	Organic acid and Its derivatives	Organic acid and Its derivatives	C9H10O2	2	0.9584	501-52-0	2.3329e+06	2.23685e+06	2.02152e+06	2.62503e+06	2.81974e+06	2.7711e+06	1.19448
MW0125987	Opipramol	315-72-0	No result	No result	D08297	Oprea1_247234	No result	Heterocyclic compounds	Heterocyclic compounds	C23H29N3O	3	0.7581	315-72-0	735013	776537	673578	184566	233090	148605	1.27453
MW0158878	Val-Ala-Phe-Asp	No result	No result	No result	No result	No result	No result	Amino acid and Its metabolites	Small Peptide	C21H30N4O7	3	0.7206	-	2.75636e+06	2.68278e+06	2.57692e+06	2.92061e+06	3.4277e+06	3.28351e+06	1.13201
MW0169369	L-Lysine	20166-34-1 25104-18-1 26714-32-9 48050-57-3 56-87-1 6899-06-5 72845-09-1	CHEBI:18019	HMDB0000182	C00047	No result	No result	Amino acid and Its metabolites	Amino acids	C6H14N2O2	2	0.9655	56-87-1	1.52212e+06	1.48903e+06	1.39184e+06	945795	942864	901318	1.28832
MW0103577	Guanosine							Nucleotide and Its metabolites	Nucleotide and Its metabolites	C10H13N5O5	2	0.948	118-00-3 | 26578-09-6 | 197227-95-5 | 103654-69-9 | 103654-70-2 | 146849-94-7 | 197227-93-3 | 202933-46-8 | 244769-87-7 | 247226-75-1 | 250586-91-5 | 250586-97-1 | 30747-23-0	4909.16	18703.9	5023.15	479500	575826	574034	1.2723
MW0107036	Glu-Thr	No result	CHEBI:73510	HMDB0028829	No result	No result	No result	Amino acid and Its metabolites	Small Peptide	C9H16N2O6	3	0.8783	6875-80-5	1.42361e+06	1.36569e+06	1.18505e+06	735572	822728	824378	1.25684
MW0123414	Colupox b	No result	No result	No result	No result	No result	No result	Amino acid and Its metabolites	Small Peptide	C25H36O5	3	0.5353	36136-11-5	856068	845953	776317	285873	306584	295480	1.29652
MW0122260	6-Methyladenine	443-72-1 552-94-3	CHEBI:28871	HMDB0002099	C08434	No result	No result	Nucleotide and Its metabolites	Nucleotide and Its metabolites	C6H7N5	3	0.6548	443-72-1	595564	637153	561263	122506	47580.8	33780.5	1.23502
MW0158608	Tyr-Ser-Lys-Glu-Ala	No result	No result	No result	No result	No result	No result	Amino acid and Its metabolites	Small Peptide	C26H40N6O10	3	0.7474	-	661439	708873	691301	138362	123134	220725	1.26352
MW0150606	Daphnetoxin, 12-((1-oxo-2,4,6-decatrienyl)oxy)-, (12-beta(2E))-	55306-10-0	No result	No result	No result	No result	No result	Benzene and substituted derivatives	Benzene and substituted derivatives	C37H42O10	3	0.6185	55306-10-0	762569	783542	666952	196468	239835	202122	1.28911
MW0105178	Tetragastrin	1947-37-1	No result	HMDB0005775	D01456	No result	No result	Amino acid and Its metabolites	Amino acid derivatives	C29H36N6O6S	3	0.7804	1947-37-1	1.23852e+06	1.27246e+06	1.07248e+06	1.48538e+06	2.08383e+06	1.58798e+06	1.08976
MW0105709	Arginine	156719-37-8 1119-34-2 25212-18-4 4455-52-1 667422-95-9 7200-25-1 74-79-3 157-06-2 7004-12-8	CHEBI:16467	HMDB0000517	C00062 D02982	Lopac0_000077	No result	Amino acid and Its metabolites	Amino acids	C6H14N4O2	2	0.959	74-79-3	1.87749e+06	1.84579e+06	1.78459e+06	2.31586e+06	2.45922e+06	2.30423e+06	1.27388
MW0155597	Pitrazepin							Heterocyclic compounds	Heterocyclic compounds	C19H19N5	3	0.8056	90685-01-1	928464	872244	658108	1.34386e+06	1.50643e+06	1.17818e+06	1.15753
MW0052554	ent-6R,16bOH,17-Trihydroxy-7-oxo-6,7-seco-19,6-kauranolide 6-O-glucoside	No result	No result	HMDB0038546	No result	No result	No result	Alcohol and amines	Alcohols	C26H40O11	3	0.6696	132242-50-3	796965	756590	704626	221470	239033	229159	1.29663
MW0001356	N-[[4-[(pyridin-2-ylamino)methyl]phenyl]methyl]pyridin-2-amine							Benzene and substituted derivatives	Benzene and substituted derivatives	C18H18N4	3	0.6912	55778-02-4	1.27145e+06	1.0394e+06	888387	605018	377358	652695	1.12523
MW0149939	Glu-Asn-Val-Glu	No result	No result	No result	No result	No result	No result	Amino acid and Its metabolites	Small Peptide	C19H31N5O10	2	0.9366	-	1.48599e+06	1.4749e+06	1.21504e+06	841506	887427	891589	1.24649
MW0061341	(Z)-7-[(1R)-2-[(1E,3S,5Z)-3-hydroxyocta-1,5-dienyl]-5-oxocyclopent-3-en-1-yl]hept-5-enoic acid							Hormones and hormone related compounds	Hormones and hormone related compounds	C20H28O4	3	0.7009	36614-31-0	686243	659293	630447	154025	173714	96427.3	1.26667
MW0145809	Asn-Leu-His							Amino acid and Its metabolites	Small Peptide	C16H26N6O5	3	0.7189	-	1.14221e+06	880128	718804	361332	426307	412740	1.22551
MW0143945	7-Benzylidenenaltrexone	129468-28-6 153611-34-8 129468-28-6	No result	No result	C20167	PDSP2_001550	No result	Benzene and substituted derivatives	Benzene and substituted derivatives	C27H27NO4	3	0.8527	129468-28-6 | 153611-34-8	758069	750979	707660	208686	244649	233586	1.29454
MW0149609	Gln-Ala-Gln-Ile-Glu	No result	No result	No result	No result	No result	No result	Amino acid and Its metabolites	Small Peptide	C24H41N7O10	3	0.7629	-	681150	665108	652556	160926	174680	134244	1.29237
MW0159921	[(2R,3S,4R,5R)-5-(2-amino-6-oxo-3H-purin-9-yl)-3,4-dihydroxyoxolan-2-yl]methyl dihydrogen phosphate							Others	Others	C10H14N5O8P	2	0.9151	85-32-5	482695	475474	177503	801916	835573	1.02712e+06	1.05372
MW0153054	Lys-Lys-Asn-Pro-Gln	No result	No result	No result	No result	No result	No result	Amino acid and Its metabolites	Small Peptide	C26H47N9O8	3	0.6794	-	2.97409e+06	2.84273e+06	2.577e+06	3.06528e+06	3.44641e+06	3.40639e+06	1.07901
MW0110218	L-Tyrosyl-L-serine							Amino acid and Its metabolites	Small Peptide	C12H16N2O5	3	0.7296	13588-99-3	81460	77245.8	70358.4	548425	609561	590739	1.29826
MW0157871	Thr-Val-Thr							Amino acid and Its metabolites	Small Peptide	C13H25N3O6	3	0.7276	-	746917	653469	556621	303974	76545.1	59684.4	1.12514
MW0159212	Val-Tyr-Gln-His-Val	No result	No result	No result	No result	No result	No result	Amino acid and Its metabolites	Small Peptide	C30H44N8O8	3	0.8532	-	701719	542844	577167	17485.1	135750	156731	1.07738
MW0157635	Thr-Glu-Lys-Asp-Glu	No result	No result	No result	No result	No result	No result	Amino acid and Its metabolites	Small Peptide	C24H40N6O13	3	0.8247	-	1.07906e+06	1.05106e+06	941907	497299	537990	526386	1.28699
MW0107448	Ile-Leu-Asn							Amino acid and Its metabolites	Small Peptide	C16H30N4O5	3	0.7372	-	724089	707076	475676	103882	169549	127386	1.25996
MW0147483	Ciliatocholic acid	13222-48-5	CHEBI:1019	No result	No result	No result	No result	Aldehyde,Ketones,Esters	Esters	C26H46NO7P	3	0.6222	13222-48-5	946659	916324	876716	397859	433478	404046	1.29491
MW0107572	1-(2-Amino-3-methylpentanoyl)pyrrolidine-2-carboxylic acid	No result	No result	No result	No result	No result	No result	Organic acid and Its derivatives	Organic acid and Its derivatives	C11H20N2O3	3	0.6816	-	779638	788613	737032	254329	282522	265780	1.29655
MW0141905	2,2'-(1-phenyl-1H-1,2,4-triazole-3,5-diyl)diphenol	No result	CHEBI:855	No result	C11569	No result	No result	Heterocyclic compounds	Heterocyclic compounds	C20H15N3O2	3	0.7306	-	1.36166e+06	1.30973e+06	1.16467e+06	757792	803322	779964	1.274
MW0153279	Lysyl threonine	97791-84-9	CHEBI:73606	No result	No result	No result	No result	Amino acid and Its metabolites	Small Peptide	C10H21N3O4	3	0.8647	97791-84-9	546181	537321	562374	32925.9	76920.3	49247.2	1.27248
MW0151190	Hoffmanniolide	No result	No result	No result	C20008	No result	No result	Heterocyclic compounds	Heterocyclic compounds	C42H70O17S	3	0.5268	-	890771	924564	742689	321657	347950	405486	1.26905
MW0153221	Lys-Gln-Ala-Gly-Asp-Val	80755-87-9	No result	No result	No result	No result	No result	Amino acid and Its metabolites	Small Peptide	C25H44N8O10	2	0.9039	80755-87-9	773238	770185	680973	324761	102777	319724	1.10099
MW0053527	Gibberellin A14	4955-22-0	CHEBI:29588	No result	C11858	No result	No result	Organic acid and Its derivatives	Organic acid and Its derivatives	C20H28O5	3	0.6241	4955-22-0 | 429678-85-3	600626	532469	432813	19596.9	45519.2	29820	1.27792
MW0153188	Lys-Tyr-Tyr-Arg-Val	No result	No result	No result	No result	No result	No result	Amino acid and Its metabolites	Small Peptide	C35H53N9O8	3	0.8046	-	589401	652022	529321	160586	78185.9	64121.6	1.24323
MW0158919	Val-Asn-Leu-Arg-Thr	No result	No result	No result	No result	No result	No result	Amino acid and Its metabolites	Small Peptide	C25H47N9O8	3	0.8134	-	604912	550743	476292	42403.7	63943.8	58582.5	1.28959
MEDN0788	LXA5	No result	No result	No result	No result	No result	No result	FA	Oxidized lipids	C20H30O5	1b	0.6042	110657-98-2	906837	736740	283431	103034	223092	143069	1.1017
MW0153842	Methyllycaconitine Perchlorate, Delphinium sp.	No result	No result	No result	No result	No result	No result	Alkaloids	Terpenoid alkaloids	C37H50N2O10	3	0.7205	21019-30-7 | 1356-60-1	646713	621866	548262	110865	126149	122068	1.29589
MW0146312	Asp-Val-Ala-Arg	No result	No result	No result	No result	No result	No result	Amino acid and Its metabolites	Small Peptide	C18H33N7O7	3	0.618	-	601368	567121	521545	48409.8	109367	75837.6	1.26422
MW0123149	Brassica napus non-fluorescent chlorophyll catabolite 3	No result	No result	No result	No result	No result	No result	Heterocyclic compounds	Heterocyclic compounds	C34H38N4O8	3	0.7336	173740-48-2	980591	982507	853798	507420	444951	409214	1.27205
MW0143305	4-Epiminocycline	No result	No result	No result	No result	No result	No result	Heterocyclic compounds	Heterocyclic compounds	C23H27N3O7	2	0.9036	43168-51-0	692574	675839	613748	164742	177278	184938	1.29615
MEDL01834	Capsianoside I	No result	No result	HMDB0002318	No result	No result	No result	Terpenoids	Ditepenoids	C32H52O14	2	0.818	121924-04-7	459981	994126	340184	157816	106775	78116.2	1.17489
MW0149164	Fetidine	7072-86-8	CHEBI:5049	No result	C09441	No result	No result	Alkaloids	Alkaloids	C40H46N2O8	3	0.8098	7072-86-8	4.56346e+06	4.49315e+06	4.24388e+06	4.78151e+06	4.97406e+06	4.98098e+06	1.16215
MW0156499	Salannin	No result	CHEBI:67309	No result	No result	No result	No result	Terpenoids	Triterpene	C34H44O9	3	0.7066	992-20-1	470413	690378	831756	147016	215265	198955	1.23465
MW0124874	JWH 018 6-hydroxyindole metabolite	No result	No result	No result	No result	No result	No result	Aldehyde,Ketones,Esters	Ketones	C24H23NO2	3	0.775	-	882550	790857	710175	287814	369430	302148	1.26996
MW0159000	Val-Glu-Thr-Glu	No result	No result	No result	No result	No result	No result	Amino acid and Its metabolites	Small Peptide	C19H32N4O10	2	0.9094	-	626852	618335	545948	119941	121343	131052	1.29714
MW0008726	N-[4-[[6-Methoxy-7-[3-(4-morpholinyl)propoxy]-4-quinazolinyl]amino]phenyl]benzamide							Benzene and substituted derivatives	Benzene and substituted derivatives	C29H31N5O4	3	0.8798	331771-20-1	1.01513e+06	597207	701942	239231	362259	296370	1.19679
MW0008096	N-(2-phenylphenyl)-8-[4-(3-pyridinyl)-1-triazolyl]octanamide							Benzene and substituted derivatives	Benzene and substituted derivatives	C27H29N5O	3	0.7556	-	816153	866542	765510	346557	353738	338958	1.29494
MW0009717	Salutaridinol	3271-79-2	CHEBI:18373 CHEBI:26600	No result	C05220	No result	No result	Benzene and substituted derivatives	Benzene and substituted derivatives	C19H23NO4	3	0.8103	-	1.13494e+06	367005	353007	53093.5	193145	200088	1.0057
MEDL02040	(+)-Gallocatechin	3371-27-5	CHEBI:71225	No result	No result	No result	No result	Flavonoids	Flavonoid	C15H14O7	2	0.8131	970-73-0	1.42122e+06	1.30456e+06	1.20116e+06	810987	871768	853965	1.26276
MW0103593	9-[(3S,4S,5R)-3,4-dihydroxy-5-(hydroxymethyl)oxolan-2-yl]-1H-purin-6-one							Nucleotide and Its metabolites	Nucleotide and Its metabolites	C10H12N4O5	2	0.9638	-	864340	789188	686649	302171	335172	314815	1.28278
MW0063676	Stevioside	57817-89-7 57817-89-7	CHEBI:9271	HMDB0034945	C09189	No result	No result	Terpenoids	Ditepenoids	C38H60O18	3	0.6803	57817-89-7	891858	833850	916689	332267	547723	388084	1.20609
MW0151497	Ile-Leu-Thr							Amino acid and Its metabolites	Small Peptide	C16H31N3O5	3	0.6919	-	792595	762375	717709	281486	313831	308388	1.29371
MW0143689	5-Oxoavermectin''2b'' aglycone	No result	No result	No result	C11954	No result	No result	Aldehyde,Ketones,Esters	Ketones	C33H46O9	3	0.5829	-	2.52891e+06	2.67396e+06	2.3074e+06	2.16547e+06	1.9906e+06	1.98804e+06	1.15735
MW0156618	Cashmiradelphine	69787-05-9	CHEBI:3450	No result	C08668	No result	No result	Terpenoids	Ditepenoids	C37H52N2O11	3	0.6532	69787-05-9	607019	374860	545760	133520	22507.7	8971.73	1.12983
MW0145459	Arg-Phe-Asn-Ala-His							Amino acid and Its metabolites	Small Peptide	C28H41N11O7	3	0.8323	-	1.17298e+06	1.19797e+06	1.12795e+06	1.57808e+06	1.674e+06	1.60096e+06	1.28533
MW0155813	Pro-Asp-Leu							Amino acid and Its metabolites	Small Peptide	C15H25N3O6	3	0.8183	-	736695	749825	656923	234306	288921	269076	1.28529
MW0011897	PC(8:0/8:0)							GP	PC	C24H48NO8P	3	0.7554	19191-91-4	706169	659065	585500	191366	202967	208450	1.29312
MW0155399	Phe-Val-Arg-Arg	No result	No result	No result	No result	No result	No result	Amino acid and Its metabolites	Small Peptide	C26H44N10O5	3	0.8939	-	765173	765732	659066	274929	294357	280304	1.29156
MW0049017	3-[3-[5-[3,4-dihydroxy-6-(hydroxymethyl)-5-[3,4,5-trihydroxy-6-(hydroxymethyl)oxan-2-yl]oxyoxan-2-yl]oxy-4-hydroxy-6-methyloxan-2-yl]oxy-5,14-dihydroxy-10-(hydroxymethyl)-13-methyl-2,3,4,6,7,8,9,11,12,15,16,17-dodecahydro-1H-cyclopenta[a]phenanthren-17-yl]-2H-furan-5-one							Heterocyclic compounds	Heterocyclic compounds	C41H64O19	3	0.654	210637-19-7	1.18969e+06	1.14769e+06	1.12953e+06	720867	714026	696357	1.29642
MW0142582	2-thio PAF	96801-55-7	No result	No result	No result	No result	No result	Organic acid and Its derivatives	Phosphoric acids	C26H55NO6PS+	3	0.6454	96801-55-7	557854	497135	436542	6697.64	30479.2	120208	1.11761
MW0015564	[(1S,6S,7S,8R,9R,13R,14R,16S,18R)-8-acetyloxy-11-ethyl-5,7,14-trihydroxy-6,16,18-trimethoxy-13-(methoxymethyl)-11-azahexacyclo[7.7.2.12,5.01,10.03,8.013,17]nonadecan-4-yl] benzoate							Benzene and substituted derivatives	Benzene and substituted derivatives	C34H47NO11	3	0.8932	-	1.1465e+06	876934	628841	352529	533593	432198	1.10559
MW0144662	Ala-Lys-Gly-Lys-Ser	No result	No result	No result	No result	No result	No result	Amino acid and Its metabolites	Small Peptide	C20H39N7O7	3	0.6711	-	633443	587966	549115	92413.2	183981	161255	1.24406
MW0005838	6-Phosphogluconic acid							Organic acid and Its derivatives	Organic acid and Its derivatives	C6H13O10P	3	0.6576	921-62-0	697739	725096	765681	1.24509e+06	1.12284e+06	1.14437e+06	1.27975
MW0152148	Latrunculin a							Heterocyclic compounds	Heterocyclic compounds	C22H31NO5S	3	0.6538	76343-93-6	202485	364837	348845	634637	950101	648771	1.16067
MW0157700	Thr-Leu-Asp-Glu	No result	No result	No result	No result	No result	No result	Amino acid and Its metabolites	Small Peptide	C19H32N4O10	3	0.6441	-	505764	575369	376496	78413.3	43973.7	19996.2	1.23255
MW0147786	Coronatine	62251-96-1 6326-34-7	CHEBI:80730	No result	C16790	No result	No result	Amino acid and Its metabolites	Small Peptide	C18H25NO4	3	0.681	62251-96-1	1.001e+06	925890	773754	403177	561454	423505	1.21333
MW0158179	Trp-Ile-Trp	No result	No result	No result	No result	No result	No result	Amino acid and Its metabolites	Small Peptide	C28H33N5O4	3	0.7197	-	614528	492062	312480	88636.9	25801.8	18669.9	1.20843
MW0156619	Septentrionine	70553-63-8	CHEBI:9114	No result	C08706	No result	No result	Terpenoids	Ditepenoids	C38H54N2O11	3	0.6688	70553-63-8	554002	516614	472314	13984.3	154461	90711.5	1.0772
MEDN0006	L-Tyrosine	55520-40-6 556-03-6 60-18-4 69168-08-7 71523-79-0	CHEBI:17895 CHEBI:58315	HMDB0000158	C00082 D00022	No result	No result	Amino acid and Its metabolites	Amino acids	C9H11NO3	1a	0.9623	60-18-4	1.37252e+06	1.37812e+06	1.27658e+06	872012	965225	910497	1.27383
MW0145703	Asn-Asp-Leu-Asp	No result	No result	No result	No result	No result	No result	Amino acid and Its metabolites	Small Peptide	C18H29N5O10	2	0.927	-	957034	685789	774756	386141	344796	421988	1.24244
MW0169609	Ouabain							Hormones and hormone related compounds	Hormones and hormone related compounds	C29H44O12	3	0.7913	630-60-4	382347	404010	297456	779241	826054	742492	1.25972
MW0106796	Dapt							Amino acid and Its metabolites	Amino acid derivatives	C23H26F2N2O4	3	0.8553	208255-80-5	295584	399283	267918	788458	801157	636334	1.23304
MW0151140	His-Val-Arg-Asp	No result	No result	No result	No result	No result	No result	Amino acid and Its metabolites	Small Peptide	C21H35N9O7	3	0.744	-	1.49363e+06	1.38738e+06	1.10154e+06	738807	992868	992598	1.06027
MW0109039	Pantethine	16816-67-4 303-05-9	CHEBI:31959	HMDB0003828	No result	No result	No result	Alcohol and amines	Polyamines	C22H42N4O8S2	3	0.831	16816-67-4	986645	1.05818e+06	962190	563457	595557	595140	1.28952
MW0124177	Furafylline	80288-49-9 84605-06-1	No result	No result	No result	Lopac0_000538	No result	Heterocyclic compounds	Heterocyclic compounds	C12H12N4O3	3	0.725	80288-49-9	1.24923e+06	1.24806e+06	1.17498e+06	780482	824866	820868	1.28887
MW0145374	Arg-His-His							Amino acid and Its metabolites	Small Peptide	C18H28N10O4	3	0.759	-	551127	542306	545721	155403	119580	119318	1.29089
MW0107731	Leu-Ile-Thr							Amino acid and Its metabolites	Small Peptide	C16H31N3O5	3	0.7427	-	1.71022e+06	1.64421e+06	1.51808e+06	1.24641e+06	1.07018e+06	1.32447e+06	1.16749
MW0151558	Ile-Pro-Glu							Amino acid and Its metabolites	Small Peptide	C16H27N3O6	3	0.7032	-	915128	897739	832134	445257	498733	471137	1.28706
MW0143742	6,8a-Seco-6,8a-deoxy-5-oxoavermectin''1b'' aglycone	No result	No result	No result	C11961	No result	No result	Aldehyde,Ketones,Esters	Ketones	C33H46O7	3	0.674	-	508474	426784	427572	104283	24705.6	6806.27	1.13934
MW0149683	Gln-Glu-Leu-Glu	No result	No result	No result	No result	No result	No result	Amino acid and Its metabolites	Small Peptide	C21H35N5O10	3	0.8993	-	686756	667155	571984	305741	214012	186581	1.24352
FDATN01453	Atosiban	90779-69-4	No result	No result	No result	No result	No result	Others	Medicine	C43H67N11O12S2	2	0.8254	90779-69-4	756923	1.13994e+06	847467	425957	516674	582676	1.14958
MW0062220	Prostaglandin B3							Hormones and hormone related compounds	Hormones and hormone related compounds	C20H28O4	3	0.7203	36614-32-1	1.17981e+06	1.19146e+06	1.07551e+06	719471	784766	723971	1.27514
MW0148301	Deltorphin	119975-64-3	CHEBI:81455	No result	C18010	No result	No result	Amino acid and Its metabolites	Small Peptide	C44H62N10O10S2	3	0.6596	119975-64-3	471627	446664	402605	22911.6	41512.3	41416.9	1.28317
MW0150604	[(1R,2R,6S,7S,8R,10S,11S,12R,14S,16S,17R,18R)-6,7-dihydroxy-8-(hydroxymethyl)-4,18-dimethyl-14-nonyl-5-oxo-16-prop-1-en-2-yl-9,13,15,19-tetraoxahexacyclo[12.4.1.01,11.02,6.08,10.012,16]nonadec-3-en-17-yl] benzoate							Benzene and substituted derivatives	Benzene and substituted derivatives	C37H48O10	3	0.7646	60195-69-9	671147	425807	415314	133387	92416.6	75828.9	1.25236
MW0153135	Lys-Ser-Phe-Glu	No result	No result	No result	No result	No result	No result	Amino acid and Its metabolites	Small Peptide	C23H35N5O8	3	0.8414	-	464173	486245	452445	71034.9	55246	69290.8	1.29577
MW0155975	Pro-Pro-Glu	No result	No result	No result	No result	No result	No result	Amino acid and Its metabolites	Small Peptide	C15H23N3O6	3	0.7549	-	1.18343e+06	1.12072e+06	868285	1.31996e+06	1.62086e+06	1.43883e+06	1.07235
MW0139004	Moxidectin	113507-06-5 113507-06-5 119718-45-5	No result	No result	D05084	No result	No result	Heterocyclic compounds	Heterocyclic compounds	C37H53NO8	3	0.5009	113507-06-5	579902	471505	460007	84015.6	129912	97420.2	1.27754
MW0105628	Angiotensin IV							Benzene and substituted derivatives	Benzene and substituted derivatives	C40H54N8O8	3	0.5572	12676-15-2	884544	729612	667526	1.06811e+06	1.15973e+06	1.25255e+06	1.18791
MW0106016	BayCysLT2	712313-33-2	No result	No result	No result	No result	No result	Organic acid and Its derivatives	Organic acid and Its derivatives	C34H39NO8	3	0.793	712313-33-2	454497	484705	474514	63489.5	76862.8	79524	1.29566
MW0158623	Tyr-Thr-Ile							Amino acid and Its metabolites	Small Peptide	C19H29N3O6	3	0.7425	-	907663	835186	816818	471580	470411	426337	1.28634
MW0169897	Taxol C	No result	No result	No result	No result	No result	No result	Benzene and substituted derivatives	Benzene and substituted derivatives	C46H57NO14	3	0.6793	153415-45-3	944709	916660	914222	1.28705e+06	1.34697e+06	1.33058e+06	1.29425
MW0106770	gamma-Glutamylglutamate	1116-22-9 112415-83-5	CHEBI:73705	HMDB0011737	C05282	No result	No result	Amino acid and Its metabolites	Small Peptide	C10H16N2O7	2	0.9376	1116-22-9	1.05235e+06	1.13539e+06	1.34251e+06	833523	730727	780407	1.2067
MW0158167	Trp-His-Thr-Ile-Ile	No result	No result	No result	No result	No result	No result	Amino acid and Its metabolites	Small Peptide	C33H48N8O7	3	0.7583	-	487390	568326	440656	127250	167291	17386.2	1.04424
MW0143565	5Androstan-3ol-17-one sulfate	No result	No result	No result	No result	No result	No result	Others	Others	C19H30O5S	2	0.907	-	830755	843819	712307	373024	421107	412770	1.27599
MW0126431	Resorcinolnaphthalein	41307-63-5	No result	No result	No result	No result	No result	Heterocyclic compounds	Heterocyclic compounds	C24H14O5	3	0.7547	41307-63-5	1.0275e+06	511294	623047	290893	352725	339661	1.12514
MEDP0510	Carnitine C2:0	No result	No result	No result	No result	No result	No result	FA	CAR	C9H17NO4	1b	0.5697	4398-79-2	855216	794073	664217	447291	368246	328852	1.23535
MW0000475	Usambarensine	36150-14-8	CHEBI:9910	No result	C09249	No result	No result	Alkaloids	Alkaloids	C29H28N4	3	0.7604	36150-14-8	596838	556624	526545	152317	241200	118385	1.22881
MW0149961	Glu-Cys-Glu-Val-Lys	No result	No result	No result	No result	No result	No result	Amino acid and Its metabolites	Small Peptide	C24H42N6O10S	3	0.6902	-	413144	654204	455808	93162	129803	133906	1.25986
MW0144352	Ac-Yvad-cho							Amino acid and Its metabolites	Small Peptide	C23H32N4O8	3	0.897	143313-51-3	629641	604176	580572	953119	1.02564e+06	1.00099e+06	1.28965
MW0109202	Phenylalanyl-Gamma-glutamate							Organic acid and Its derivatives	Organic acid and Its derivatives	C14H19N3O4	3	0.5822	-	299287	367484	281452	675554	720577	716358	1.2733
MW0156640	Ser-Arg-Glu-Val-Ser	No result	No result	No result	No result	No result	No result	Amino acid and Its metabolites	Small Peptide	C22H40N8O10	3	0.7666	-	614921	459357	423030	136651	89262	110348	1.26964
MW0144121	9-Fluoro-11beta,16alpha,17,21-tetrahydroxypregn-4-ene-3,20-dione	337-02-0 38469-83-9	CHEBI:34516	No result	C14638	No result	No result	Aldehyde,Ketones,Esters	Ketones	C21H29FO6	3	0.598	337-02-0	670233	670405	577325	237762	292410	235954	1.27739
MW0107946	Prolylproline	20488-28-2 205754-32-1 37784-16-0	CHEBI:73646	HMDB0011180	No result	No result	No result	Amino acid and Its metabolites	Amino acids	C10H16N2O3	2	0.9021	20488-28-2 | 99265-53-9	542031	537820	469606	131668	149582	120786	1.29138
MW0156031	Pro-Tyr-Leu	No result		No result	No result	No result	No result	Amino acid and Its metabolites	Small Peptide	C20H29N3O5	3	0.742	-	1.47577e+06	1.41205e+06	1.29011e+06	1.67442e+06	1.838e+06	1.81171e+06	1.20615
MEDN0058	N-Acetylneuraminic Acid(SA)	No result	No result	No result	No result	No result	No result	Organic acid and Its derivatives	Organic acid and Its derivatives	C11H19NO9	2	0.9605	19342-33-7	926317	868483	818969	450961	528652	490407	1.27375
MW0144555	Ala-Glu-Asn-Arg	No result	No result	No result	No result	No result	No result	Amino acid and Its metabolites	Small Peptide	C18H32N8O8	3	0.7685	-	1.33026e+06	1.20254e+06	1.00729e+06	1.45589e+06	1.56798e+06	1.65946e+06	1.10011
MW0156869	Ser-Phe-Asp-Lys-Ser	No result	No result	No result	No result	No result	No result	Amino acid and Its metabolites	Small Peptide	C25H38N6O10	3	0.7518	-	521703	461990	430948	97847.4	53844.4	120205	1.2491
MW0146340	Aspergillic acid	22810-67-9 490-02-8 51395-20-1	CHEBI:2879	No result	C10571	BSPBio_002749 Spectrum5_000152	No result	Organic acid and Its derivatives	Organic acid and Its derivatives	C12H20N2O2	3	0.838	490-02-8 | 22810-67-9	1.44254e+06	1.25894e+06	1.16825e+06	972639	898383	857838	1.20242
MW0125355	N-(3-acetamidopropyl)pyrrolidin-2-one	106692-36-8	No result	HMDB0061384	No result	No result	No result	Aldehyde,Ketones,Esters	Ketones	C9H16N2O2	3	0.8054	106692-36-8	670010	675446	659489	278049	307481	284825	1.29605
MW0140628	(R)-Reticuline	3968-19-2	CHEBI:17428	No result	C05178	No result	No result	Heterocyclic compounds	Heterocyclic compounds	C19H23NO4	3	0.672	3968-19-2 | 1699-46-3	142682	680442	415100	39456.7	20583.1	43611.7	1.18951
MW0138365	Hernandezine	6681-13-6 68155-95-3	CHEBI:5677	No result	C09461	No result	No result	Heterocyclic compounds	Heterocyclic compounds	C39H44N2O7	3	0.7801	6681-13-6	510176	475663	287989	42381.7	37166.8	61043.2	1.27186
MW0158396	Tyr-Asn-His-Arg							Amino acid and Its metabolites	Small Peptide	C25H36N10O7	3	0.8111	-	381568	284441	706440	791789	842925	863035	1.01561
MW0146161	Asp-Ile-Tyr-Asp	No result	No result	No result	No result	No result	No result	Amino acid and Its metabolites	Small Peptide	C23H32N4O10	3	0.7339	-	691325	687353	665448	322881	291333	307468	1.29621
MEDN1417	(±)13-HpODE	No result	No result	No result	No result	No result	No result	FA	Oxidized lipids	C18H32O4	1b	0.733	23017-93-8	763429	690044	581927	310731	308865	298258	1.27437
MW0009466	Pimelic Diphenylamide 106	No result	No result	No result	No result	No result	No result	Benzene and substituted derivatives	Benzene and substituted derivatives	C20H25N3O2	3	0.796	937039-45-7	662594	633151	749222	183204	222310	522498	1.05057
MW0118695	2-Methyl-1-[1,3,7,9-tetrahydroxy-4,6-dimethyl-8-(2-methyl-1-oxobutyl)-2-dibenzofuranyl]-1-butanone							Benzene and substituted derivatives	Benzene and substituted derivatives	C24H28O7	3	0.8279	-	980180	900896	863496	518008	518979	590770	1.26989
MW0107526	Imazapyr	81334-34-1 94795-74-1	CHEBI:82021	No result	C18864	CBDivE_005644 ChemDiv3_000415 IDI1_008408	No result	Organic acid and Its derivatives	Organic acid and Its derivatives	C13H15N3O3	3	0.7337	-	459536	458186	430357	65802.5	87866.9	84760.3	1.29202
MW0000287	Omacetaxine mepesuccinate	26833-87-4 64131-12-0	CHEBI:71019	No result	D08956	No result	No result	Alkaloids	Alkaloids	C29H39NO9	3	0.6027	26833-87-4	710377	635916	565302	325249	344680	135886	1.08766
MW0145260	Arg-Arg-His-Val-Phe	No result	No result	No result	No result	No result	No result	Amino acid and Its metabolites	Small Peptide	C32H51N13O6	3	0.7456	-	433818	382337	356056	16673.1	38424.2	12794.6	1.26708
MW0159383	Vobtusine							Alkaloids	Alkaloids	C43H50N4O6	3	0.5588	19772-79-3	716087	635184	591424	253591	299848	288059	1.27899
MW0146178	Asp-Leu-Ser-Glu	No result	No result	No result	No result	No result	No result	Amino acid and Its metabolites	Small Peptide	C18H30N4O10	2	0.9161	-	724985	689414	665378	330370	376750	275470	1.26143
MW0159863	Hypoxanthine	146469-94-5 146469-95-6 184856-40-4 51953-04-9 51953-23-2 68-94-0 71117-22-1 95121-06-5	CHEBI:17368	HMDB0000157	C00262	BSPBio_003163 PDSP1_000299 PDSP2_000297 Spectrum5_000564	No result	Nucleotide and Its metabolites	Nucleotide and Its metabolites	C5H4N4O	2	0.8194	68-94-0	655926	597679	506118	199646	233703	232802	1.27691
MEDTN03187	p-Cresol sulfate	3233-58-7	CHEBI:82914	HMDB0011635 HMDB0059933	No result	No result	No result	Organic acid and Its derivatives	Organic acid and Its derivatives	C7H8O4S	2	0.8554	3233-58-7	844125	779280	669750	374752	418664	407914	1.26525
MW0153133	Lys-Ser-Leu-Ala-Met	No result	No result	No result	No result	No result	No result	Amino acid and Its metabolites	Small Peptide	C23H44N6O7S	3	0.7688	-	471276	444127	368797	51941.3	91780.3	50052.8	1.26962
MEDP0151	2-Hydroxy-6-Aminopurine							Nucleotide and Its metabolites	Nucleotide and Its metabolites	C5H5N5O	3	0.7197	3373-53-3	220044	202316	172673	508050	600142	572870	1.28253
MW0103476	AICA ribonucleotide							Nucleotide and Its metabolites	Nucleotide and Its metabolites	C9H15N4O8P	2	0.9117	3031-94-5	314893	302616	255084	580471	718306	658080	1.26971
MW0141791	1-Naphthalenesulfonic acid	No result	No result	No result	No result	No result	No result	Benzene and substituted derivatives	Benzene and substituted derivatives	C10H8O3S	3	0.5122	-	870634	927061	1.04932e+06	1.12121e+06	1.39617e+06	1.39979e+06	1.1275
MW0124809	RCS-4-C4 homolog	No result	No result	No result	No result	No result	No result	Aldehyde,Ketones,Esters	Ketones	C20H21NO2	3	0.7201	-	789310	663186	728011	315100	369127	427647	1.24461
MW0141631	17-phenyl trinor PGF2 cyclohexyl amide	No result	No result	No result	No result	No result	No result	Hormones and hormone related compounds	Hormones and hormone related compounds	C29H43NO4	3	0.6602	-	1.25363e+06	1.18875e+06	1.08278e+06	777950	850424	828819	1.25154
MW0149853	Gln-Val-Asp-Glu	No result	No result	No result	No result	No result	No result	Amino acid and Its metabolites	Small Peptide	C19H31N5O10	2	0.9175	-	523212	518444	629959	247205	120504	237336	1.18466
MW0122764	Alfuzosin Hydrochloride	133880-44-1 2682-98-6 81403-68-1	CHEBI:32286	No result	D01692	No result	No result	Others	Medicine	C19H28ClN5O4	3	0.585	81403-68-1	633207	604609	571216	232162	266806	244462	1.29139
MW0143256	4-Aminoestra-1,3,5(10)-triene-3,17beta-diol	6301-88-8 6962-93-2	CHEBI:79528	No result	C15005	No result	No result	Alcohol and amines	Alcohols	C18H25NO2	3	0.6412	6301-88-8	1.33924e+06	1.23362e+06	1.20664e+06	847427	944030	922952	1.25243
MW0154535	N-Methyl-2,3,7,8-tetramethoxy-5,6-dihydrobenzophenathridine-6-ethanoic acid	No result	CHEBI:31881	No result	C12223	No result	No result	Alkaloids	Alkaloids	C24H25NO6	3	0.6625	-	426381	404938	373141	58139.3	28756.8	55833.9	1.27244
MW0154775	Aplysiatoxin, 17-debromo-29-de(1-hydroxyethyl)-29-(hydroxymethyl)-							Heterocyclic compounds	Heterocyclic compounds	C31H46O10	3	0.5001	66671-95-2	275583	348710	200337	589487	718471	564488	1.19802
MW0106587	Enalaprilat	76420-72-9 84680-54-6	CHEBI:4786	HMDB0041886	C11720	No result	No result	Benzene and substituted derivatives	Benzene and substituted derivatives	C18H24N2O5	3	0.6642	76420-72-9	678717	387204	619259	186255	310922	140427	1.12284
MEDP1664	Glu-Leu-Arg	No result	No result	No result	No result	No result	No result	Amino acid and Its metabolites	Small Peptide	C17H32N6O6	3	0.7998	-	459579	397662	361895	81955.5	67533.2	22505.3	1.21166
MW0145338	Arg-Glu-Ala-Asp-Ile							Amino acid and Its metabolites	Small Peptide	C24H42N8O10	2	0.9108	-	707439	742713	598005	1.07282e+06	855508	1.16514e+06	1.13511
MW0107020	Glu-Ser	5875-38-7	CHEBI:73509	HMDB0028828	No result	No result	No result	Amino acid and Its metabolites	Small Peptide	C8H14N2O6	3	0.7452	5875-38-7	899108	818761	859028	512460	498300	521044	1.29155
MW0139894	Triparanol	78-41-1 82864-23-1	No result	No result	No result	No result	No result	Heterocyclic compounds	Heterocyclic compounds	C27H32ClNO2	3	0.8883	78-41-1	530887	504744	392647	137692	99752.7	146466	1.26786
MW0142063	5,6-Dihydrouridine 5'-monophosphate	58-97-9	CHEBI:74673	No result	C04639	No result	No result	Nucleotide and Its metabolites	Nucleotide and Its metabolites	C9H15N2O9P	3	0.5907	-	550352	523970	186734	27014	65512.4	124778	1.1046
MW0143065	3'-N-Debenzoyl-2'-deoxytaxol	No result	CHEBI:74030	No result	C16523	No result	No result	Benzene and substituted derivatives	Benzene and substituted derivatives	C40H47NO12	3	0.603	-	422420	397261	503318	136944	31186.5	115914	1.13973
MW0144613	Ala-Ile-Gln-Arg-Thr	No result	No result	No result	No result	No result	No result	Amino acid and Its metabolites	Small Peptide	C24H45N9O8	3	0.8653	-	445770	345421	377185	68391.3	4564.27	61832.6	1.08413
MW0109893	Thr-Pro-Tyr	No result	CHEBI:73661	No result	No result	No result	No result	Amino acid and Its metabolites	Small Peptide	C18H25N3O6	3	0.8318	-	609158	564927	565382	237438	239365	229872	1.29755
MEDP1049	2-Phenoxyethanol	1020398-73-5 122-99-6 56101-99-6 56257-90-0 9004-78-8	CHEBI:64275	HMDB0041607	D08359	No result	No result	Alcohol and amines	Alcohols	C8H10O2	1b	0.6264	122-99-6	1.65712e+06	1.71265e+06	1.94632e+06	1.47796e+06	1.42505e+06	1.3856e+06	1.16552
MEDN0412	Biopterin							Heterocyclic compounds	Pteridines and derivatives	C9H11N5O3	2	0.8581	36183-24-1 | 22150-76-1	7803.19	3666.66	8738.54	328304	361588	352077	1.28809
MW0142698	3',5'-Cyclic dGMP	No result	No result	No result	C02507	No result	No result	Nucleotide and Its metabolites	Nucleotide and Its metabolites	C10H12N5O6P	3	0.5262	-	446210	395640	324488	44216.2	46708	56243.8	1.29157
MW0148034	Cys-Lys-Asn							Amino acid and Its metabolites	Small Peptide	C13H25N5O5S1	3	0.7389	-	481005	427279	345930	96396.6	111684	28891.7	1.17013
MW0103562	Floxuridine	50-91-9	CHEBI:60761	HMDB0014467	C11736 D04197	No result	No result	Others	FDA	C9H11FN2O5	3	0.7037	50-91-9	737607	1.04331e+06	544740	354328	484775	473063	1.0246
MEDP1670	Gly-Gly-Phe		CHEBI:73905	No result	No result	No result	No result	Amino acid and Its metabolites	Small Peptide	C13H17N3O4	3	0.7941	6234-26-0	1.0437e+06	952631	844924	1.13111e+06	1.36792e+06	1.35422e+06	1.13018
MW0009033	N-Desmethyl Imatinib	404844-02-6	No result	HMDB0013862 HMDB0060621	No result	No result	No result	Benzene and substituted derivatives	Benzene and substituted derivatives	C28H29N7O	3	0.7509	-	555757	552121	505356	191508	200477	210194	1.29544
MW0124222	Garcinolic acid	No result	No result	No result	No result	BSPBio_002525 Spectrum5_000026	No result	Organic acid and Its derivatives	Organic acid and Its derivatives	C38H46O9	3	0.7016	-	376536	358080	348920	27386.6	37584.2	9386.58	1.24617
MW0054245	Lactitol	585-86-4 81025-04-9	CHEBI:75323	No result	D08266	No result	No result	Carbohydrates and Its metabolites	Sugars	C12H24O11	3	0.6344	585-86-4	545120	595979	682556	324221	337534	152955	1.10671
MW0115191	Ptd(S)Ins-(3,4)-P2(1,2-dipalmitoyl)	No result	No result	No result	No result	No result	No result	Organic acid and Its derivatives	Sulfonic acids	C41H81O18P3S	3	0.8015	-	478610	305563	415131	52704.2	70407.6	69095.5	1.2794
MW0146127	Asp-His-Leu-Thr-Gln	No result	No result	No result	No result	No result	No result	Amino acid and Its metabolites	Small Peptide	C25H40N8O10	3	0.6457	-	433110	339792	341404	30793.3	40350.9	37455.2	1.29354
MEDP1609	4-(Aminomethyl)benzoic acid	56-91-7	No result	No result	D07568	CBDivE_002627 Oprea1_689394	No result	Organic acid and Its derivatives	Organic acid and Its derivatives	C8H9NO2	2	0.9019	-	255160	664007	224725	43642.1	38958.2	62251.1	1.21646
MW0117281	N-phenyl-4-(quinolin-3-ylmethyl)piperidine-1-carboxamide	959151-50-9	No result	No result	No result	No result	No result	Alcohol and amines	Amines	C22H23N3O	3	0.8465	959151-50-9	1.03209e+06	1.03033e+06	865241	471536	739244	722203	1.04819
MW0146772	Bis(glutathionyl)spermine disulfide	No result	No result	No result	C16564	No result	No result	Amino acid and Its metabolites	Amino acid derivatives	C30H54N10O10S2	3	0.8729	-	643028	452913	544415	162179	251729	239756	1.2176
MW0139282	Pentamycin							Heterocyclic compounds	Heterocyclic compounds	C35H58O12	3	0.6224	6834-98-6	493446	448387	404608	103510	130186	126993	1.28694
MW0141031	[(2R,3S,4R,5R)-5-[5-amino-4-[(4-amino-4-oxo-butanoyl)amino]imidazol-1-yl]-3,4-dihydroxy-tetrahydrofuran-2-yl]methyl dihydrogen phosphate							Alcohol and amines	Amines	C12H20N5O9P	3	0.654	-	11707.6	18885.6	3633.26	326379	342106	350813	1.25393
MW0115038	Norstictic acid	571-67-5	No result	No result	No result	BSPBio_001909 Spectrum5_000226	No result	Organic acid and Its derivatives	Organic acid and Its derivatives	C18H12O9	3	0.844	571-67-5	624533	626172	535288	232520	312703	257948	1.25991
MW0149513	17-Amino-17-demethoxygeldanamycin	949449-23-4	No result	No result	No result	No result	No result	Heterocyclic compounds	Heterocyclic compounds	C28H39N3O8	2	0.9197	64202-81-9	487528	1.00228e+06	680822	480672	343502	364318	1.00829
MW0143158	4-(beta-D-ribofuranosyl)aminobenzene 5'-phosphate	No result	CHEBI:72787 CHEBI:72778	No result	C20559	No result	No result	Organic acid and Its derivatives	Organic acid and Its derivatives	C11H16NO7P	3	0.7327	173932-55-3	937115	666345	535168	298417	460889	398041	1.07059
MEDP1674	Val-Val-Val	No result	No result	No result	No result	No result	No result	Amino acid and Its metabolites	Small Peptide	C15H29N3O4	3	0.8376	28130-13-4	1.192e+06	1.17791e+06	1.0905e+06	1.42485e+06	1.5462e+06	1.46927e+06	1.24765
MW0107431	Ile-Asp-Lys							Amino acid and Its metabolites	Small Peptide	C16H30N4O6	3	0.7449	-	672008	477718	549938	198984	210272	313536	1.20583
MW0015788	Androsterone sulfate	2479-86-9 290-38-0 29042-01-1	CHEBI:83037	HMDB0002759	No result	No result	No result	Hormones and hormone related compounds	Hormones and hormone related compounds	C19H30O5S	3	0.6837	2479-86-9	401745	285895	340380	1708.83	19007.9	33754.2	1.14834
MW0152622	Leu-phe	No result	CHEBI:73585	No result	No result	No result	No result	Amino acid and Its metabolites	Small Peptide	C15H22N2O3	2	0.9067	-	971523	922746	854777	1.18514e+06	1.29449e+06	1.24233e+06	1.24656
MW0155281	Phe-Lys-Tyr	No result	No result	No result	No result	No result	No result	Amino acid and Its metabolites	Small Peptide	C24H32N4O5	3	0.6574	-	416310	456865	213933	43009.7	46361.3	29033.2	1.25976
MW0104827	Oxoadipic acid	3184-35-8 33045-53-3	CHEBI:15753	HMDB0000225	C00322	No result	No result	Organic acid and Its derivatives	Organic acid and Its derivatives	C6H8O5	2	0.8441	3184-35-8	1.18442e+06	1.21677e+06	1.23464e+06	1.60727e+06	1.48229e+06	1.50953e+06	1.26506
MW0152580	Leucokinin I	104600-89-7	CHEBI:80183	No result	C15927	No result	No result	Amino acid and Its metabolites	Amino acid derivatives	C41H53N11O12	3	0.7163	104600-89-7	458295	422652	391154	130546	85226.1	94769	1.2779
MW0143139	4-(1-Ethyl-2-phenylbutyl)phenol	3929-22-4 51517-94-3	CHEBI:79601	No result	C15082	No result	No result	Benzene and substituted derivatives	Benzene and substituted derivatives	C18H22O	3	0.8444	3929-22-4	790352	766831	583239	339898	442929	396114	1.19949
MW0151463	Ile-His-Val-Leu-Glu				No result			Amino acid and Its metabolites	Small Peptide	C28H47N7O8	3	0.8752	-	826119	793257	709939	1.03359e+06	1.14651e+06	1.10983e+06	1.24007
MW0150417	Gly-Lys-Gln-Leu-Glu	No result	No result	No result	No result	No result	No result	Amino acid and Its metabolites	Small Peptide	C24H43N7O9	3	0.7492	-	601109	590768	257190	105407	183223	201426	1.08593
MW0144995	alpha-Ribazole	132-13-8 15339-50-1 15340-96-2	CHEBI:10329	No result	C05775	No result	No result	Nucleotide and Its metabolites	Nucleotide and Its metabolites	C14H18N2O4	3	0.651	132-13-8	754264	769417	731756	568347	360035	369239	1.15694
MW0125224	Mozambioside	No result	No result	HMDB0037002	No result	No result	No result	Terpenoids	Terpenoids	C26H36O10	3	0.5507	70717-95-2	489615	507594	463719	157052	179986	166622	1.29453
MW0155896	Pro-Ile-His-Asp-Arg	No result	No result	No result	No result	No result	No result	Amino acid and Its metabolites	Small Peptide	C27H44N10O8	3	0.7732	-	582903	403680	553072	248661	251081	83812.8	1.0592
MW0145785	Asn-Ile-Asp-Lys							Amino acid and Its metabolites	Small Peptide	C20H36N6O8	3	0.893	-	666168	630829	538491	922252	952711	915382	1.2422
MW0061616	[(1S,2R,7S,9R,11R,12R,13S,16R)-15-[(1S)-1-[(2R)-4,5-dimethyl-6-oxo-2,3-dihydropyran-2-yl]ethyl]-12-hydroxy-2,16-dimethyl-3-oxo-8-oxapentacyclo[9.7.0.02,7.07,9.012,16]octadeca-4,14-dien-13-yl] acetate							Amino acid and Its metabolites	polypeptide	C30H38O7	3	0.7046	-	357754	326892	386447	42593.3	41054.7	36892.2	1.29772
MW0141512	4-Pregnen-17alpha,20beta-diol-3-one-20-sulfate	138949-80-1	No result	No result	No result	No result	No result	Aldehyde,Ketones,Esters	Esters	C21H32O6S	3	0.7531	138949-80-1	559282	347513	254175	55079.7	73144.1	85308	1.23897
MW0169682	Piperidine	110-89-4 6091-44-7	CHEBI:18049	HMDB0034301	C01746	No result	No result	Heterocyclic compounds	Heterocyclic compounds	C5H11N	3	0.6911	110-89-4	1.20777e+06	1.25811e+06	1.30943e+06	964109	928371	939115	1.27947
MEDN1054	tetranor-12(R)-HETE							FA	Oxidized lipids	C16H26O3	3	0.6214	135271-51-1	840048	261248	197874	114640	121455	120367	1.00747
MW0139972	Xanthotoxol arabinoside	No result	No result	HMDB0031971	No result	No result	No result	Flavonoids	Flavonoid	C16H14O8	3	0.5451	160845-06-7	744326	414435	429818	170927	297439	177594	1.12295
MW0158952	Val-Cys-Asn-Ser-Lys	No result	No result	No result	No result	No result	No result	Amino acid and Its metabolites	Small Peptide	C21H39N7O8S	3	0.7414	-	450077	434571	378430	151318	97037.8	74034.1	1.24445
MW0157783	Thr-Pro-Leu	No result	No result	No result	No result	No result	No result	Amino acid and Its metabolites	Small Peptide	C15H27N3O5	3	0.7626	-	487023	468176	426184	132536	158642	153793	1.29029
MW0144314	Ac-Ser-Asp-Lys-Pro							Amino acid and Its metabolites	polypeptide	C20H33N5O9	3	0.7367	120081-14-3	528799	520335	481788	789791	820359	856141	1.28472
MW0151009	His-Lys-Gln-Lys							Amino acid and Its metabolites	Small Peptide	C23H41N9O6	3	0.8523	-	593329	554111	534867	829579	906625	878455	1.27942
MW0152224	Leu-Arg-Gly-Gln-Asp	No result	No result	No result	No result	No result	No result	Amino acid and Its metabolites	Small Peptide	C23H41N9O9	3	0.6444	-	860024	647027	557343	350515	390365	394679	1.18306
MW0159187	Val-Thr-Pro-Tyr-Met	No result	No result	No result	No result	No result	No result	Amino acid and Its metabolites	Small Peptide	C28H43N5O8S	3	0.6706	-	560332	344117	316805	99828	100367	96301.1	1.25914
MW0144702	Ala-Phe-Tyr-Arg	No result	No result	No result	No result	No result	No result	Amino acid and Its metabolites	Small Peptide	C27H37N7O6	3	0.8442	-	554655	446066	488220	205286	172899	187546	1.28297
MW0146149	Asp-Ile-Ile-Tyr-Ala	No result	No result	No result	No result	No result	No result	Amino acid and Its metabolites	Small Peptide	C28H43N5O9	3	0.8022	-	489291	453784	431529	159403	159752	132352	1.28942
MW0150397	Gly-Leu-Arg-Asn-Gln	No result	No result	No result	No result	No result	No result	Amino acid and Its metabolites	Small Peptide	C23H42N10O8	3	0.8071	-	663888	672972	586898	331322	357884	316846	1.28076
MEDP1080	Gly-Trp							Amino acid and Its metabolites	Small Peptide	C13H15N3O3	1a	0.9123	2390-74-1	424635	428674	380284	709938	746884	693553	1.28382
MW0155968	Pro-Phe-Tyr-Leu-Arg							Amino acid and Its metabolites	Small Peptide	C35H50N8O7	3	0.681	-	505633	470626	418559	743113	810385	757404	1.26392
MW0142000	4'-Hydroxy-5,6,7-trimethoxyflavanone					No result	No result	Benzene and substituted derivatives	Benzene and substituted derivatives	C18H18O6	3	0.7561	59567-91-8	768769	757083	712524	1.03338e+06	1.07918e+06	1.0415e+06	1.28453
MW0149578	Gibberellin A53 aldehyde	85344-33-8	CHEBI:29601	No result	C11905	No result	No result	Aldehyde,Ketones,Esters	Aldehydes	C20H28O4	3	0.6372	85344-33-8	553452	552542	527448	242639	239169	237712	1.29897
MW0053662	Glucoconvallasaponin B	No result	No result	HMDB0034327	No result	No result	No result	Benzene and substituted derivatives	Benzene and substituted derivatives	C38H62O15	3	0.5437	16939-88-1	342192	353305	265515	20379.3	2044.52	25594.5	1.1769
MW0147031	calyculin A	101932-71-2	No result	No result	No result	No result	No result	Organic acid and Its derivatives	Phosphoric acids	C50H81N4O15P	3	0.644	101932-71-2	405492	384128	326668	55440.1	44278.5	105065	1.24427
MW0009552	3-[({4-[4-({[1-(2-Chlorophenyl)ethoxy]carbonyl}amino)-3-methyl-1,2-oxazol-5-yl]phenyl}methyl)sulfanyl]propanoic acid							Benzene and substituted derivatives	Benzene and substituted derivatives	C23H23ClN2O5S	3	0.7612	-	407138	414738	421259	79763.4	74024.7	180105	1.20384
MW0155398	Phe-Tyr-Val-Lys							Amino acid and Its metabolites	Small Peptide	C29H41N5O6	3	0.8477	-	778314	677234	496044	803517	1.04559e+06	1.01118e+06	1.01662
MW0146024	Asp-Arg-His-Lys	No result	No result	No result	No result	No result	No result	Amino acid and Its metabolites	Small Peptide	C22H38N10O7	3	0.6811	-	827189	755290	676434	1.01107e+06	1.08736e+06	1.06531e+06	1.22104
MW0146110	Asp-Glu-Val-Phe-Asp	No result	No result	No result	No result	No result	No result	Amino acid and Its metabolites	Small Peptide	C27H37N5O12	3	0.801	-	528683	529022	499581	208200	222594	223301	1.29673
MW0054140	NCGC00380859-01_C20H26O5_(5xi,6alpha,7beta)-6,11,12-Trihydroxy-7,20-epoxyabieta-8,11,13-trien-20-one	No result	No result	No result	No result	No result	No result	Alcohol and amines	Alcohols	C20H26O5	3	0.8377	-	941498	877334	633529	459251	564633	527945	1.10938
MW0103931	(4-Ethyl-2-hydroxy-6-methoxyphenyl) hydrogen sulate							Organic acid and Its derivatives	Organic acid and Its derivatives	C9H12O6S	3	0.5309	-	57173	87622.1	117149	372563	395004	388568	1.25435
MW0147491	Cinegalline	No result	No result	No result	No result	No result	No result	Alkaloids	Alkaloids	C23H30N2O6	3	0.7811	20772-38-7	479088	527492	381614	264818	162730	67396	1.06404
MW0159182	Val-Thr-Leu-Asp-Met	No result	No result	No result	No result	No result	No result	Amino acid and Its metabolites	Small Peptide	C24H43N5O9S	3	0.7532	-	901563	838376	809987	519472	590097	548259	1.26752
MW0006917	Normetanephrine	1011-74-1 17484-20-7 97-31-4	No result	HMDB0000819	No result	Lopac0_000858	No result	Benzene and substituted derivatives	Phenolics	C9H13NO3	3	0.7966	97-31-4	787061	895371	743993	589725	472680	472717	1.20895
MW0144664	Ala-Lys-His-Asp							Amino acid and Its metabolites	Small Peptide	C19H31N7O7	3	0.7538	-	731853	629107	503968	796693	1.0038e+06	954675	1.09049
MEDL00444	Pro-Ile	No result	CHEBI:74790	No result	No result	No result	No result	Amino acid and Its metabolites	Small Peptide	C11H20N2O3	2	0.884	-	1.0961e+06	1.12617e+06	1.12338e+06	819496	847178	790775	1.28706
MW0148981	Eriocarpin	66419-09-8	CHEBI:4830	No result	C08865	No result	No result	Heterocyclic compounds	Heterocyclic compounds	C29H38O11	3	0.6425	-	423886	542446	532954	209379	207515	196002	1.27816
MW0052929	N-[(2-Hydroxy-1-hydroxymethyl)ethyl]-9alpha,11alpha,15R-trihydroxy-16-(3-trifluoromethyl)phenoxy)-17,18,19,20-tetranorprosta-5Z,13E-dien-1-amide							Hormones and hormone related compounds	Hormones and hormone related compounds	C26H36F3NO7	3	0.7214	-	497667	488073	450814	232893	161967	156692	1.2569
MW0147976	Cys-Ala-Pro-Pro-Thr	No result	No result	No result	No result	No result	No result	Amino acid and Its metabolites	Small Peptide	C20H33N5O7S	3	0.6956	-	504146	352378	356300	119880	89991.1	118032	1.26758
MW0153694	Met-Trp-Trp	No result	No result	No result		No result	No result	Amino acid and Its metabolites	Small Peptide	C27H31N5O4S1	3	0.73	-	1.21213e+06	1.20464e+06	1.13964e+06	1.45863e+06	1.52366e+06	1.45834e+06	1.26981
MW0143686	5-Oxoavermectin''1a'' aglycone	No result	No result	No result	C11978	No result	No result	Aldehyde,Ketones,Esters	Ketones	C34H46O8	3	0.8261	-	474367	443804	337982	103438	132991	137724	1.2672
MEDP1679	Glu-Val-Phe	No result	No result	No result	No result	No result	No result	Amino acid and Its metabolites	Small Peptide	C19H27N3O6	3	0.6455	31461-61-7	1.62259e+06	1.50341e+06	1.4245e+06	1.66491e+06	1.87088e+06	1.89374e+06	1.09985
MW0153538	Met-Gln-Pro-Arg-Val	No result	No result	No result	No result	No result	No result	Amino acid and Its metabolites	Small Peptide	C26H47N9O7S	3	0.7548	-	1.50126e+06	1.42425e+06	1.20318e+06	951407	1.09289e+06	1.20675e+06	1.01313
MW0153395	7,8,19,20-Tetrahydro-15,18-etheno-2,6:9,13-dimetheno-1,14-benzodioxacyclodocosin-11,12,24-triol	88418-46-6	No result	No result	No result	No result	No result	Aldehyde,Ketones,Esters	Ketones	C28H24O5	3	0.7536	88418-46-6	636374	579333	593109	308627	322504	300833	1.29282
MW0003225	2-[(1-{3-[4-(Biphenyl-4-ylcarbonyl)-2-propylphenoxy]propyl}-1,2,3,4-tetrahydroquinolin-5-yl)oxy]-2-methylpropanoic acid							Benzene and substituted derivatives	Benzene and substituted derivatives	C38H41NO5	3	0.6482	-	728092	653972	643813	360711	394147	395624	1.2805
FDATN01058	Baricitinib phosphate							Others	Medicine	C16H20N7O6PS	3	0.7003	-	104301	93668.3	85490.6	364326	402059	391874	1.29459
MW0110227	Tyr-Tyr-Lys							Amino acid and Its metabolites	Small Peptide	C24H32N4O6	3	0.6439	-	556366	510601	471367	207078	222470	234879	1.28664
MW0151485	Ile-Leu-Asn-Asp	No result	No result	No result	No result	No result	No result	Amino acid and Its metabolites	Small Peptide	C20H35N5O8	3	0.7091	-	799305	608299	345802	307253	257088	316265	1.01539
MW0143688	5-Oxoavermectin''2a'' aglycone	No result	No result	No result	No result	No result	No result	Aldehyde,Ketones,Esters	Ketones	C34H48O9	3	0.5673	-	140744	433379	514703	58369.8	61147	96757.1	1.1225
MW0115040	Nystatin	1400-61-9 1400-61-9 34786-70-4 114-90-9	CHEBI:473992	No result	C12155	BSPBio_002119 IDI1_000263 Spectrum5_001333	No result	Aldehyde,Ketones,Esters	Esters	C47H75NO17	3	0.7855	34786-70-4 | 1400-61-9	374206	349253	290346	80461.3	41183.2	21278.2	1.21915
MW0138317	Gonyautoxin 1	80226-62-6 84505-77-1	No result	No result	No result	No result	No result	Heterocyclic compounds	Heterocyclic compounds	C10H17N7O9S	3	0.5736	60748-39-2	342239	387199	384073	91822.8	84867.9	69231.9	1.29045
MW0150605	Gnididin	55306-11-1 55306-11-1	CHEBI:5514	No result	C09096	No result	No result	Benzene and substituted derivatives	Benzene and substituted derivatives	C37H44O10	3	0.5357	55306-11-1	340584	407734	462688	112156	153182	81973.3	1.23889
MW0143929	7-[2-TRIFLUOROMETHYL-4-(2-HYDROXYPHENYL)-1,3-DIOXAN-cis-5-YL]-HEPT-5Z-ENOIC ACID							Others	Others	C18H21F3O5	3	0.7877	106393-80-0	538732	559814	384648	197926	159167	265676	1.19301
MW0146449	Avadharidine							Benzene and substituted derivatives	Benzene and substituted derivatives	C36H51N3O10	3	0.6954	509-16-0	632409	629146	402299	791994	920136	810613	1.05404
ZINC14447816	7-Hydroxy-2,5-dimethyl-4H-1-benzopyran-4-one							Benzene and substituted derivatives	Benzene and substituted derivatives	C11H10O3	3	0.5964	38412-47-4	546064	584251	677791	741721	941691	983536	1.13511
MW0106168	Citric acid	12262-73-6 5077-53-2 5949-29-1 6018-92-4 623158-96-3 77-92-9 126-44-3 2572-63-6 77-92-9	CHEBI:30769 CHEBI:16947	HMDB0000094	C00158 D00037	BSPBio_003240 Oprea1_502996	No result	Organic acid and Its derivatives	Organic acid and Its derivatives	C6H8O7	2	0.9673	77-92-9	1.91013e+06	1.89618e+06	2.11152e+06	1.68489e+06	1.71027e+06	1.66612e+06	1.18118
MW0145898	Asn-Thr-Asp-Arg	No result	No result	No result	No result	No result	No result	Amino acid and Its metabolites	Small Peptide	C18H32N8O9	3	0.7557	-	365220	418578	207536	45860.2	40511.8	48785.4	1.26816
MW0150223	Glu-Val-Tyr-Asp	No result	No result	No result	No result	No result	No result	Amino acid and Its metabolites	Small Peptide	C23H32N4O10	3	0.8042	-	629657	587975	515729	262651	293660	322595	1.2621
MW0158476	Tyr-His-Arg-Arg	No result	No result	No result	No result	No result	No result	Amino acid and Its metabolites	Small Peptide	C27H42N12O6	3	0.7818	-	548274	499649	492586	209116	242122	235250	1.28723
MW0169721	Puromycin	53-79-2 58-58-2	CHEBI:17939	No result	C01610 D05653	BPBio1_000682 BSPBio_000620 Prestwick3_000480	No result	Nucleotide and Its metabolites	Nucleotide and Its metabolites	C22H29N7O5	3	0.6181	53-79-2 | 58-58-2	4.1817e+06	4.26914e+06	3.96245e+06	4.28994e+06	4.51185e+06	4.46269e+06	1.01093
MW0156827	Ser-Leu-Ser-Gly-Leu	No result	No result	No result	No result	No result	No result	Amino acid and Its metabolites	Small Peptide	C20H37N5O8	3	0.6894	-	464282	223768	199629	15589.8	9290.83	14454.1	1.27492
MW0149775	Gln-Phe-Glu-Lys	No result	No result	No result	No result	No result	No result	Amino acid and Its metabolites	Small Peptide	C25H38N6O8	3	0.7968	-	394875	387718	332213	65548.9	121501	79454.1	1.25699
MW0156638	Ser-Arg-Ala-Lys	No result	No result	No result	No result	No result	No result	Amino acid and Its metabolites	Small Peptide	C18H36N8O6	3	0.759	-	551540	488620	428848	206031	214140	201461	1.28071
MEDL02680	Lyciumin D	No result	No result	HMDB0040695	No result	No result	No result	Alkaloids	Alkaloids	C45H57N9O11	3	0.705	150415-40-0	385010	438896	290687	105906	74607.1	89674.6	1.26949
MW0148097	Cysteinyl-aspartate	90427-86-4	No result	HMDB0028771	No result	No result	No result	Amino acid and Its metabolites	Small Peptide	C7H12N2O5S	3	0.5481	-	408097	426503	513061	155999	185018	164414	1.27941
MW0145339	Arg-Glu-Ala-Phe-Arg	No result	No result	No result	No result	No result	No result	Amino acid and Its metabolites	Small Peptide	C29H47N11O8	3	0.6572	-	325827	352591	248914	7330.3	27625.3	50328.1	1.1894
MW0126352	Pyronaridine	74847-35-1	No result	No result	No result	No result	No result	Benzene and substituted derivatives	Benzene and substituted derivatives	C29H32ClN5O2	3	0.7163	74847-35-1	452807	327491	393578	114942	65938	152837	1.20614
MW0110301	Tyr-Pro	51871-47-7	No result	No result	No result	No result	No result	Amino acid and Its metabolites	Small Peptide	C14H18N2O4	2	0.8846	-	743787	720542	689548	420581	446661	446493	1.29043
MW0106822	Gln-Phe-Lys							Amino acid and Its metabolites	Small Peptide	C20H31N5O5	3	0.6806	-	457427	170530	410900	100042	76115.7	25120.5	1.10782
MW0158188	Trp-Leu-Lys-Ser-Asn	No result	No result	No result	No result	No result	No result	Amino acid and Its metabolites	Small Peptide	C30H46N8O8	3	0.7729	-	365580	262211	282111	51912.8	4212.58	18634.7	1.16412
MW0145692	Asn-Asn-Phe-Ser-Lys	No result	No result	No result	No result	No result	No result	Amino acid and Its metabolites	Small Peptide	C26H40N8O9	3	0.8086	-	260731	501013	297116	52800	123092	51352.3	1.18823
MW0139599	Rolitetracycline	No result	No result	No result	No result	No result	No result	Benzene and substituted derivatives	Benzene and substituted derivatives	C27H33N3O8	3	0.6568	751-97-3 | 68060-64-0	205061	413443	330109	23031.7	47937.8	47397.5	1.24233
MW0103574	Gemcitabine							Others	FDA	C9H11F2N3O4	3	0.7114	95058-81-4	385416	614211	411090	593400	896904	745433	1.01481
MW0150854	His-Asn-Ile-Asp	No result	No result	No result	No result	No result	No result	Amino acid and Its metabolites	Small Peptide	C20H31N7O8	3	0.7721	-	342266	294422	317250	27403.9	80030.7	23047.8	1.22027
MW0015563	Aconifine							Benzene and substituted derivatives	Benzene and substituted derivatives	C34H47NO12	3	0.6403	41849-35-8	272335	433147	553353	173673	182679	79569.7	1.10109
MW0008809	N-Acetyltyramine	1202-66-0	No result	No result	No result	ACon1_000453 MEGxm0_000183	No result	Benzene and substituted derivatives	Phenolics	C10H13NO2	3	0.7298	1202-66-0	405303	403392	436032	147964	137223	136684	1.29723
MW0150145	Glu-Ser-Leu-Met-Lys	No result	No result	No result	No result	No result	No result	Amino acid and Its metabolites	Small Peptide	C25H46N6O9S	3	0.6571	-	321380	326486	272971	6368.34	45806.5	45870.8	1.15269
MW0146414	Atractyloside I	No result	No result	No result	C17866	No result	No result	Steroids	Steroid	C27H44O13	3	0.5003	-	424147	397857	378539	118604	173159	85997.2	1.22928
MW0158984	Val-Glu-Gln							Amino acid and Its metabolites	Small Peptide	C15H26N4O7	3	0.7493	-	583506	535446	531782	262662	294243	271079	1.28866
MW0009507	Prenoxdiazine	47543-65-7	No result	No result	D07392	No result	No result	Benzene and substituted derivatives	Benzene and substituted derivatives	C23H27N3O	3	0.7142	47543-65-7	398961	367954	356883	96642.3	81945.4	122781	1.27883
MW0148251	Deltorphin I	122752-15-2	CHEBI:81500	No result	C18097	No result	No result	Amino acid and Its metabolites	Small Peptide	C37H52N8O10	3	0.6926	122752-15-2	397094	423754	378642	127213	126838	123263	1.29777
MW0002563	2-[(4-{[([1,1'-Biphenyl]-4-yl)methyl]amino}-6-chloropyrimidin-2-yl)sulfanyl]octanoic acid							Benzene and substituted derivatives	Benzene and substituted derivatives	C25H28ClN3O2S	3	0.8425	-	673143	689474	601974	384860	365512	392250	1.28131
MW0152909	Lys-Asp-Pro-Ala-Asp	No result	No result	No result	No result	No result	No result	Amino acid and Its metabolites	Small Peptide	C22H36N6O10	3	0.7591	-	426113	553101	307194	106752	150332	210184	1.15849
MW0151636	Ile-Tyr-Val							Amino acid and Its metabolites	Small Peptide	C20H31N3O5	3	0.7302	-	519745	484017	449115	195119	224741	214263	1.28657
MW0151078	His-Ser-Gly-Asn-Ile	No result	No result	No result	No result	No result	No result	Amino acid and Its metabolites	Small Peptide	C21H34N8O8	3	0.6844	-	647027	544435	478067	263020	298195	293493	1.24845
MW0124960	AM2201 7-hydroxyindole metabolite							Aldehyde,Ketones,Esters	Ketones	C24H22FNO2	3	0.7727	-	171784	135795	128928	356174	517092	377939	1.25314
MW0123489	Danofloxacin	112398-08-0 1134-61-8	No result	No result	D07774	No result	No result	Heterocyclic compounds	Heterocyclic compounds	C19H20FN3O3	3	0.8526	112398-08-0	971973	882913	893075	626582	561706	752059	1.15861
MW0056211	[(2R)-2-pentadecanoyloxy-3-phosphonooxypropyl] (Z)-docos-13-enoate							GP	PA	C40H77O8P	2	0.9333	-	709718	547705	447661	355824	294453	250455	1.14961
MEDP1592	Citicoline	1477-47-0 987-78-0 33818-15-4 987-78-0	CHEBI:16436 CHEBI:49086 CHEBI:58779	HMDB0001413	C00307 D00057 D03528	No result	No result	Nucleotide and Its metabolites	Nucleotide and Its metabolites	C14H26N4O11P2	2	0.8613	987-78-0	368658	361526	326533	75294.9	110462	77112.1	1.27782
MW0149945	Glu-Asp-Gln-Asp	No result	No result	No result	No result	No result	No result	Amino acid and Its metabolites	Small Peptide	C18H27N5O12	3	0.7336	-	447628	14267.2	354623	6807.2	8749.14	8361.69	1.01779
MW0062079	Pisumoside B							Alcohol and amines	Alcohols	C32H52O16	3	0.6092	333334-43-3	181513	305759	153568	450328	538781	441954	1.15652
MW0151651	Ile-Val-Leu-Thr-Gly	No result	No result	No result	No result	No result	No result	Amino acid and Its metabolites	Small Peptide	C23H43N5O7	3	0.6242	-	433485	413660	388467	170356	183985	97683	1.21231
MW0011242	Vomifoliol 9-[xylosyl-(1->6)-glucoside]							FA	Others	C24H38O12	2	0.9169	126221-59-8	431652	377975	493385	149424	194338	181694	1.26228
MW0015896	Arjunolic acid 3-glucoside	No result	No result	HMDB0040941	No result	No result	No result	Carbohydrates and Its metabolites	Carbohydrates and Its metabolites	C36H58O10	3	0.6315	99543-11-0	350399	333280	297370	67503.2	67662	68887.8	1.29752
MW0152262	Leu-Asp-Glu-Lys	No result	No result	No result	No result	No result	No result	Amino acid and Its metabolites	Small Peptide	C21H37N5O9	3	0.7691	-	417666	296176	254880	48719	66754.6	77446.7	1.26116
MW0155836	Pro-Gln-Leu	No result	No result	No result	No result	No result	No result	Amino acid and Its metabolites	Small Peptide	C16H28N4O5	3	0.7519	-	860900	738733	564521	396813	542959	449508	1.06298
MW0108782	N-Formyl-Met-Leu-Phe	59880-97-6	CHEBI:53490	No result	C11596	No result	No result	Amino acid and Its metabolites	Small Peptide	C21H31N3O5S	3	0.7908	59880-97-6	394152	335729	249699	84835.8	63914.5	59381.7	1.26965
MW0013003	1-Stearoyl-2-linoleoyl-sn-glycero-3-phosphoethanolamine							GP	PE	C41H78NO8P	3	0.7113	7266-53-7	58514.5	72000	75373.4	305146	246544	422777	1.26739
MW0114436	Ethyl cellulose	No result	No result	HMDB0033370	No result	No result	No result	Carbohydrates and Its metabolites	Sugars	C20H38O11	3	0.6519	9004-57-3	404997	387024	352967	145960	149587	88369.2	1.24028
MW0158603	Tyr-Ser-Glu-Lys							Amino acid and Its metabolites	Small Peptide	C23H35N5O9	3	0.6789	-	522250	387318	524120	644009	849964	699797	1.11359
MW0148641	D-Mannonic acid	642-99-9	CHEBI:33076 CHEBI:17767	No result	C00514	No result	No result	Organic acid and Its derivatives	Organic acid and Its derivatives	C6H12O7	3	0.6746	-	1.46565e+06	1.47922e+06	1388437	1.21697e+06	1.18154e+06	1.17528e+06	1.26652
MW0149192	Finaconitine	81161-27-5	CHEBI:5061	No result	C08684	No result	No result	Benzene and substituted derivatives	Phenolics	C33H46N2O10	3	0.5267	81161-27-5	1.10804e+06	932152	744308	740582	612207	676485	1.00105
MW0119310	3-[1-[(4-Chlorophenyl)methyl]-5-fluoro-3-methyl-2-indolyl]-2,2-dimethylpropanoic acid							Organic acid and Its derivatives	Organic acid and Its derivatives	C21H21ClFNO2	3	0.7208	103253-15-2	401040	268414	284016	54714.5	94026.6	50597.4	1.24733
MW0158512	Tyr-Leu-Ala-Lys	No result	No result	No result	No result	No result	No result	Amino acid and Its metabolites	Small Peptide	C24H39N5O6	3	0.6303	-	412938	374077	352257	121601	132646	130921	1.29351
MW0150138	Glu-Ser-Gln-Arg-Gln							Amino acid and Its metabolites	Small Peptide	C24H42N10O11	3	0.806	-	228300	49462.1	122777	336594	401686	410985	1.0504
MW0157722	Thr-Lys-Asn-Glu	No result	No result	No result	No result	No result	No result	Amino acid and Its metabolites	Small Peptide	C19H34N6O9	3	0.8641	-	626195	651653	545733	322889	337739	419348	1.21991
MW0150926	His-Glu-Phe-Gly-Asp	No result	No result	No result	No result	No result	No result	Amino acid and Its metabolites	Small Peptide	C26H33N7O10	3	0.5153	-	325719	318057	293072	59666.1	68943.9	65713.9	1.29678
MW0123679	Dihydropteroate							Organic acid and Its derivatives	Organic acid and Its derivatives	C14H14N6O3	3	0.7191	2134-76-1	3067.77	11010.7	10535.9	209171	246055	310613	1.26365
MW0151913	Diesaconitine							Benzene and substituted derivatives	Benzene and substituted derivatives	C35H49NO12	3	0.5664	16298-90-1	301593	245304	266622	468623	547480	537977	1.26485
MW0150309	Gly-Arg-Tyr	No result	No result	No result	No result	No result	No result	Amino acid and Its metabolites	Small Peptide	C17H26N6O5	3	0.7959	-	644303	412921	509835	184188	237700	406630	1.02021
MW0122829	Amiloride	137053-86-2 2016-88-8 2609-46-3	CHEBI:2639	HMDB0014732	C06821 D07447	BCBcMAP01_000101 BPBio1_000015 BSPBio_000013 BSPBio_001572 BSPBio_001826 Bio1_000359 Bio1_000848 Bio1_001337 Bio2_000292 Bio2_000772 IDI1_000182 IDI1_034042 Lopac0_000111 Prestwick2_000007 Prestwick3_000007 Spectrum5_000776	No result	Heterocyclic compounds	Heterocyclic compounds	C6H8ClN7O	3	0.7294	2016-88-8	231652	372789	216530	27084.8	6537.08	49603.8	1.16898
MW0150527	Gly-Val-Ala-Asp-Val							Amino acid and Its metabolites	Small Peptide	C19H33N5O8	3	0.8568	-	332536	288094	252412	488020	584233	537841	1.24243
MW0148472	Diginatin	52589-12-5	CHEBI:27614	No result	C08861	No result	No result	Steroids	Steroid	C41H64O15	3	0.573	52589-12-5	399413	378251	368341	132316	143902	135003	1.29683
MW0153191	Lys-Tyr-Val-Met-Leu	No result	No result	No result	No result	No result	No result	Amino acid and Its metabolites	Small Peptide	C31H52N6O7S	3	0.8883	-	414206	385765	246154	77729	39849.2	199778	1.05806
MW0009910	Tiocarlide							Benzene and substituted derivatives	Benzene and substituted derivatives	C23H32N2O2S	3	0.7563	910-86-1	125006	100908	60320.7	302541	330107	379688	1.22779
MW0110174	Tumonoic acid A	No result	CHEBI:69207	No result	No result	No result	No result	Organic acid and Its derivatives	Organic acid and Its derivatives	C19H33NO4	3	0.7295	-	538344	532108	493927	261633	292391	285416	1.28721
MEDN1649	Barbital	57-44-3	CHEBI:31252	No result	D01740	Oprea1_012884 Oprea1_497227	No result	Heterocyclic compounds	Heterocyclic compounds	C8H12N2O3	3	0.763	-	604186	567505	518863	417209	276900	271731	1.16162
MW0109069	alphaS-Amino-2-[[4S-amino-4-carboxybutyl]amino]-4H-imidazo[4,5-b]pyridine-4-hexanoic acid							Amino acid and Its metabolites	Small Peptide	C17H26N6O4	3	0.7538	-	551556	540392	483879	232286	256924	365963	1.18177
MW0156753	Ser-Gly-Glu-Leu-His	No result	No result	No result	No result	No result	No result	Amino acid and Its metabolites	Small Peptide	C22H35N7O9	3	0.8847	-	1.35849e+06	1.30095e+06	1.38393e+06	964652	1.23596e+06	1.12352e+06	1.04083
MW0105941	Asp-Asp							Amino acid and Its metabolites	Small Peptide	C8H12N2O7	3	0.7234	58471-53-7	161978	156643	351340	359223	628715	398928	1.00924
MW0013317	25-Acetyl-6,7-didehydrofevicordin F 3-glucoside	No result	No result	HMDB0036338	No result	No result	No result	Steroids	Steroid	C37H52O13	3	0.5259	-	543200	530044	650977	335542	327467	345918	1.26057
MW0148962	methyl (1S,15R,17S,18S)-6-[(1S,12R,14R,15E,18S)-15-ethylidene-18-methoxycarbonyl-17-methyl-10,17-diazatetracyclo[12.3.1.03,11.04,9]octadeca-3(11),4,6,8-tetraen-12-yl]-17-[(1R)-1-hydroxyethyl]-7-methoxy-3,13-diazapentacyclo[13.3.1.02,10.04,9.013,18]nonadeca-2(10),4,6,8-tetraene-1-carboxylate							Heterocyclic compounds	Heterocyclic compounds	C43H52N4O6	3	0.5398	4835-65-8	281491	247797	222298	9788.42	5628.12	21434.6	1.26169
MW0009890	D-Nmappd	35922-06-6	No result	No result	No result	No result	No result	Benzene and substituted derivatives	Benzene and substituted derivatives	C23H38N2O5	3	0.733	35922-06-6	355186	260399	241769	9979.27	72578.8	66341	1.09127
MW0146130	Asp-His-Phe-Asp	No result	No result	No result	No result	No result	No result	Amino acid and Its metabolites	Small Peptide	C23H28N6O9	3	0.8039	-	285188	244545	259424	28038.1	31877.1	22782.7	1.29408
MW0144273	Acetylintermedine	74243-01-9	CHEBI:80702	No result	C16750	No result	No result	Alkaloids	Alkaloids	C17H27NO6	3	0.5757	-	702031	323785	324252	200396	226643	220342	1.02423
MW0148594	Discadenine	No result	No result	No result	No result	No result	No result	Heterocyclic compounds	Heterocyclic compounds	C14H20N6O2	3	0.6488	62061-49-8	394396	518179	438709	162856	209018	279326	1.17609
MW0151445	Ile-His-Arg-Arg	No result	No result	No result	No result	No result	No result	Amino acid and Its metabolites	Small Peptide	C24H44N12O5	3	0.8643	-	359444	330454	285277	73839.8	123805	79163.6	1.253
MW0154621	Nostocyclopeptide A2	No result	No result	No result	No result	No result	No result	Amino acid and Its metabolites	polypeptide	C40H54N8O9	3	0.6286	-	291116	194681	438024	104416	15219.5	108201	1.00166
MW0107278	His-Tyr-Arg	No result	No result	No result	No result	No result	No result	Amino acid and Its metabolites	Small Peptide	C21H30N8O5	3	0.7496	-	381191	462954	345978	192400	216666	86047.9	1.09522
MW0114793	Maltopentaose	34620-76-3	CHEBI:61952	HMDB0012254	No result	No result	No result	Carbohydrates and Its metabolites	Sugars	C30H52O26	2	0.8607	34620-76-3	331094	323760	299503	91749.9	84745.6	83093.8	1.29743
MW0106735	Fumonisin FP1	No result	No result	HMDB0031826	No result	No result	No result	Organic acid and Its derivatives	Organic acid and Its derivatives	C39H62NO16+	3	0.5176	182063-58-7	241055	363216	303690	79459.5	65434.6	68702.2	1.27874
MEDN0161	Guanosine 3',5'-Cyclic Monophosphate							Nucleotide and Its metabolites	Nucleotide and Its metabolites	C10H11N5O7P-	1a	0.897	-	96713.1	106724	83281.4	351012	317540	311950	1.28848
MW0139871	Tricetin	520-31-0	CHEBI:507499	HMDB0029620	C10192	BSPBio_003253 Spectrum5_000615	No result	Flavonoids	Flavonoid	C15H10O7	3	0.6573	520-31-0	595950	314931	486755	213157	316338	179427	1.03993
MW0107265	His-Lys-Lys							Amino acid and Its metabolites	Small Peptide	C18H33N7O4	3	0.6385	-	331248	346840	314685	107572	97237	107350	1.29655
MW0137746	Coumarin Suberoylanilide Hydroxamic Acid							Organic acid and Its derivatives	Organic acid and Its derivatives	C18H22N2O5	3	0.8585	-	435101	390526	474175	627574	649206	702989	1.24243
MW0169214	Gatifloxacin	112811-59-3 160738-57-8 180200-66-2	CHEBI:5280	HMDB0015178	C07661 D08011	BSPBio_002697 Spectrum5_001468	No result	Heterocyclic compounds	Heterocyclic compounds	C19H22FN3O4	3	0.7117	112811-59-3	268909	341977	351866	97372.1	109444	76832.9	1.2694
MW0149915	Glu-Arg-His-Asp	No result	No result	No result	No result	No result	No result	Amino acid and Its metabolites	Small Peptide	C21H33N9O9	3	0.756	-	492680	487289	492140	257770	289579	251339	1.28647
MEDN0602	Deoxyguanosine 5'-monophosphate(dGMP)							Nucleotide and Its metabolites	Nucleotide and Its metabolites	C10H14N5O7P	2	0.9092	902-04-5	5870.93	25843.1	24126	220757	155764	352478	1.20805
MW0129939	1-O-Sinapoyl-beta-D-glucose							Benzene and substituted derivatives	Benzene and substituted derivatives	C17H22O10	3	0.8994	-	117004	133904	123261	324972	365154	355724	1.29353
MW0158449	Tyr-Glu-Arg-Arg	No result	No result	No result	No result	No result	No result	Amino acid and Its metabolites	Small Peptide	C26H42N10O8	3	0.7897	-	344103	312866	321489	95330.5	108258	103201	1.29549
MW0150649	Gsh-prostaglandin A1	61631-70-7	CHEBI:5548	No result	C11367	No result	No result	Hormones and hormone related compounds	Hormones and hormone related compounds	C30H49N3O10S	3	0.5743	61631-70-7	251177	562890	351227	145078	151310	198597	1.10112
MW0000156	Brucine	1195340-33-0 145428-94-0 357-57-3	CHEBI:3193	No result	C09084	ACon1_001990 MEGxp0_001865	No result	Heterocyclic compounds	Heterocyclic compounds	C23H26N2O4	3	0.7285	357-57-3 | 145428-94-0	530973	537752	511553	298660	302803	308686	1.29722
MW0000279	Harringtonine	26833-85-2 6276-37-5 26833-85-2	CHEBI:5626	No result	C10597	No result	No result	Alkaloids	Alkaloids	C28H37NO9	3	0.6319	26833-85-2 | 25302-09-4	387201	326948	375430	125892	144602	149979	1.28384
MW0054190	kabiramide B	101550-94-1	CHEBI:68062	No result	No result	No result	No result	Heterocyclic compounds	Heterocyclic compounds	C47H69N5O14	3	0.5692	-	407072	356664	349071	145474	155087	144048	1.29122
MW0055166	Musabalbisiane C	No result	No result	HMDB0038682	No result	No result	No result	Terpenoids	Ditepenoids	C28H40O12	3	0.5818	143183-60-2	673786	629416	618137	777395	1.01567e+06	796288	1.11019
MW0155095	Phe-Arg-Leu-Phe-Leu	No result	No result	No result	No result	No result	No result	Amino acid and Its metabolites	Small Peptide	C36H54N8O6	3	0.7323	-	350982	305923	271240	82936	92407.9	84926.9	1.28934
MW0107353	His-Thr							Amino acid and Its metabolites	Small Peptide	C10H16N4O4	3	0.7818	-	254768	260559	263471	483607	490826	468126	1.29802
MW0156748	Ser-Glu-Val-Lys-Met	No result	No result	No result	No result	No result	No result	Amino acid and Its metabolites	Small Peptide	C24H44N6O9S	3	0.5812	-	303092	312877	406955	135204	121756	102848	1.26546
MW0166883	3-(2-Methylbutanoyl)-4-(isovaleryl)sucrose	No result	No result	No result	No result	No result	No result	Aldehyde,Ketones,Esters	Esters	C22H38O13	3	0.6609	-	286518	264763	237145	48148.3	40416.8	38346.7	1.29442
MEDP0401	5'-Deoxy-5'-(Methylthio) Adenosine							Nucleotide and Its metabolites	Nucleotide and Its metabolites	C11H15N5O3S	2	0.8853	2457-80-9	1718.39	2624.79	6120.61	216641	233041	221065	1.2811
MW0052938	Formestane	127128-20-5 566-48-3	CHEBI:75172	No result	D07260	No result	No result	Aldehyde,Ketones,Esters	Ketones	C19H26O3	3	0.7258	566-48-3	406050	386228	325182	138674	159966	158863	1.27833
MW0137685	cis-3,4',5-Trimethoxy-3'-hydroxystilbene							Benzene and substituted derivatives	Benzene and substituted derivatives	C17H18O4	3	0.7881	586410-08-4	422365	421539	388893	620120	635137	634587	1.28869
mws0044	Taxifolin	20254-28-8 480-18-2	CHEBI:17948	No result	C01617	ACon1_000239 MEGxp0_000741	No result	Flavonoids	Flavonoid	C15H12O7	3	0.5208	480-18-2 | 24198-97-8 | 17654-26-1 | 20254-28-8	410934	404533	413605	139686	160255	273420	1.15783
MW0106333	Cys-Tyr	1089-23-2	No result	No result	No result	No result	No result	Amino acid and Its metabolites	Small Peptide	C12H16N2O4S	3	0.7216	1089-23-2	287677	260385	208254	25081.7	40127.2	38530.3	1.27921
MW0136756	6''-O-Acetylgenistin	No result	No result	No result	No result	No result	No result	Heterocyclic compounds	Heterocyclic compounds	C23H22O11	3	0.6293	73566-30-0	1.70956e+06	1.83022e+06	1.68708e+06	1.56333e+06	1.50728e+06	1.50505e+06	1.19771
MW0133760	5-({5-[(1-hydroxy-2-methylbut-3-en-2-yl)oxy]-2,2-dimethyl-7-(2-methylbut-3-en-2-yl)-8-oxo-2H,8H-pyrano[3,2-g]chromen-10-yl}oxy)-8,8-dimethyl-3,10-bis(2-methylbut-3-en-2-yl)-2H,8H-pyrano[3,2-g]chromen-2-one							Aldehyde,Ketones,Esters	Ketones	C48H54O9	3	0.6608	-	399294	508343	407845	568857	797171	600163	1.08893
MW0155643	Podorhizol beta-D-glucoside	17187-73-4	CHEBI:27901	No result	C10876	No result	No result	Lignans and Coumarins	Lignans	C28H34O13	3	0.6214	17187-73-4	162969	235405	294317	23488.8	13520.8	5439.62	1.24081
MW0009847	Tebufenpyrad	119168-77-3 68459-97-2 68716-49-4	CHEBI:9422	No result	C11126	No result	No result	Benzene and substituted derivatives	Benzene and substituted derivatives	C18H24ClN3O	3	0.7853	119168-77-3	1.05991e+06	1.22028e+06	974869	850697	896118	859082	1.10591
MW0155380	Phe-Tyr-Gln-Lys	No result	No result	No result	No result	No result	No result	Amino acid and Its metabolites	Small Peptide	C29H40N6O7	3	0.8367	-	312935	313669	282725	79240.5	93190.1	88424.1	1.29393
MW0123754	Doramapimod							Heterocyclic compounds	Heterocyclic compounds	C31H37N5O3	3	0.8214	-	252039	253234	245657	372601	519491	504895	1.22856
MW0105651	Arg-Asp-Arg	No result	No result	No result	No result	No result	No result	Amino acid and Its metabolites	Small Peptide	C16H31N9O6	3	0.7285	-	321817	322954	297520	91816.4	106260	101900	1.29451
MW0158823	Urdamycin A	98474-21-6	CHEBI:32279	No result	C12413	No result	No result	Benzene and substituted derivatives	Benzene and substituted derivatives	C43H56O17	3	0.7036	98474-21-6	407712	470576	398161	186531	226578	222693	1.26534
MW0007415	Isofenphos-methyl	6378-11-6 99675-03-3	No result	No result	No result	No result	No result	Benzene and substituted derivatives	Benzene and substituted derivatives	C14H22NO4PS	3	0.7496	99675-03-3 | 83542-84-1	334406	448135	249207	137259	111922	145365	1.20845
FDATN00061	Entecavir hydrate	170791-09-0 209216-23-9	CHEBI:59902	No result	No result	No result	No result	Others	Medicine	C12H17N5O4	3	0.6478	209216-23-9	1.11542e+06	899533	848202	705043	746143	776032	1.0567
MW0105731	Arg-Trp	25615-38-7	CHEBI:73821	No result	No result	No result	No result	Amino acid and Its metabolites	Small Peptide	C17H24N6O3	3	0.7451	25615-38-7	247076	236792	222471	21868.2	25292.6	27005.3	1.29731
MW0110280	Tyr-Cys	No result	No result	No result	No result	No result	No result	Amino acid and Its metabolites	Small Peptide	C12H16N2O4S	3	0.6364	-	259025	255970	224067	35756.4	32831.3	38534.8	1.29713
MW0105885	Aspartylalanine	13433-02-8	CHEBI:73826	No result	No result	No result	No result	Amino acid and Its metabolites	Small Peptide	C7H12N2O5	3	0.7787	13433-02-8	808435	757575	724013	532622	563289	563444	1.26648
MW0159370	Virginiamycin m1	21411-53-0 11006-76-1 21411-53-0	CHEBI:9997	No result	C11299	No result	No result	Heterocyclic compounds	Heterocyclic compounds	C28H35N3O7	3	0.8486	21411-53-0	317880	322892	349641	143364	132436	85371.9	1.23947
FDATP01621	Benzamidine hydrochloride	143504-23-8 1670-14-0 206752-36-5 477904-89-5 63040-98-2	No result	No result	No result	No result	No result	Others	Medicine	C7H9ClN2	3	0.6882	1670-14-0 | 477904-89-5	940362	949024	1.05166e+06	785177	772839	754689	1.23972
MW0016082	beta-Acetyldigoxin	5355-48-6	No result	No result	D07556	No result	No result	Others	Others	C43H66O15	3	0.7587	5355-48-6	414077	297074	181512	84123.7	88395.1	92284.8	1.20106
MW0009783	Sulfachlorpyridazine							Benzene and substituted derivatives	Benzene and substituted derivatives	C10H9ClN4O2S	3	0.6816	80-32-0	113491	123683	64011.4	315442	288681	323260	1.22228
MW0151149	His-Val-Ile-Arg	No result	No result	No result	No result	No result	No result	Amino acid and Its metabolites	Small Peptide	C23H41N9O5	3	0.626	-	344179	338784	332566	130570	130057	129118	1.2997
MW0158663	Tyr-Val-Gln-Glu							Amino acid and Its metabolites	Small Peptide	C24H35N5O9	3	0.8917	-	270607	224033	256783	452003	450064	474843	1.27627
MW0157732	Thr-Lys-Met-Val-Glu	No result	No result	No result	No result	No result	No result	Amino acid and Its metabolites	Small Peptide	C25H46N6O9S	3	0.7617	-	358583	295618	260934	106538	129734	58717.7	1.19244
MW0144538	Ala-Gln-Glu-Val-His	No result	No result	No result	No result	No result	No result	Amino acid and Its metabolites	Small Peptide	C24H38N8O9	3	0.7607	-	284155	278471	252911	36432.6	79194.8	80621.9	1.22311
MW0145557	Arg-Val-Asn-His-Val	No result	No result	No result	No result	No result	No result	Amino acid and Its metabolites	Small Peptide	C26H45N11O7	3	0.7631	-	387531	271055	294807	69624.8	122182	142435	1.18416
MW0113273	Melibiose	585-99-9	CHEBI:61827 CHEBI:28053 CHEBI:4808	HMDB0000048 HMDB0133305 HMDB0006792	C05402	No result	No result	Carbohydrates and Its metabolites	Sugars	C12H22O11	2	0.9651	-	1.70499e+06	1.65198e+06	1.58557e+06	1.78602e+06	1.89922e+06	1.87398e+06	1.17387
MW0000484	Vindesine	53643-48-4 59917-39-4	CHEBI:36373	HMDB0014454	D06304	No result	No result	Alkaloids	Alkaloids	C43H55N5O7	3	0.6836	59917-39-4	360069	327657	351153	168988	132586	122499	1.26977
MW0143251	(4-Amino-2-methylpyrimidin-5-yl)methyl trihydrogen diphosphate							Organic acid and Its derivatives	Organic acid and Its derivatives	C6H11N3O7P2	3	0.6771	841-01-0	32536	36801	45896	264725	188628	274820	1.28132
ZINC1587804	2,2',4,4'-Tetrahydroxybenzil	5394-98-9 60809-93-0	CHEBI:79730	No result	C15218	No result	No result	Benzene and substituted derivatives	Benzene and substituted derivatives	C14H10O6	3	0.6447	5394-98-9	289264	280732	223782	88425.6	67751.2	26177.3	1.17415
MW0007207	Fluvoxamine Acid	84692-89-7 88699-91-6	No result	HMDB0060950	No result	No result	No result	Benzene and substituted derivatives	Benzene and substituted derivatives	C14H17F3N2O3	3	0.6947	88699-91-6	304579	326465	286892	137629	59247	110641	1.19021
MW0000485	Vinorelbine Ditartarate	No result	CHEBI:53750 CHEBI:32296	HMDB0014505	No result	No result	No result	Alkaloids	Alkaloids	C45H54N4O8	3	0.6139	71486-22-1	279525	326502	230100	77494.5	74648.6	75625.4	1.28433
MW0145823	Asn-Lys-Arg-Asp	No result	No result	No result	No result	No result	No result	Amino acid and Its metabolites	Small Peptide	C20H37N9O8	2	0.9119	-	343615	324332	283050	107078	119611	116171	1.28892
MW0134336	5-{[2-(hydroxymethyl)-2-methyl-7-(2-methylbut-3-en-2-yl)-5-[(2-methylbut-3-en-2-yl)oxy]-8-oxo-2H,8H-pyrano[3,2-g]chromen-10-yl]oxy}-8,8-dimethyl-3,10-bis(2-methylbut-3-en-2-yl)-2H,8H-pyrano[3,2-g]chromen-2-one							Aldehyde,Ketones,Esters	Ketones	C48H54O9	3	0.6204	-	384869	395980	388198	103745	266698	197063	1.06156
MW0109821	Tetrahydrofolic acid							Organic acid and Its derivatives	Organic acid and Its derivatives	C19H23N7O6	3	0.7315	135-16-0	301726	193448	202274	398310	457504	442601	1.18098
MW0158497	Tyr-Ile-Asn-Glu							Amino acid and Its metabolites	Small Peptide	C24H35N5O9	2	0.9342	-	84075.9	25637.8	64654.9	285624	269081	220557	1.18044
MW0115848	(2E,4E,8E)-Piperamide-C9:3	No result	No result	HMDB0038644	No result	No result	No result	Alcohol and amines	Amines	C20H23NO3	3	0.5737	117137-68-5	296246	260564	262715	69917.9	77970.8	72704.1	1.29569
MW0000453	N-(1-Allyl-3-pyrrolidinyl)propionanilide oxalate (1:1)	23257-79-6 616-01-3	No result	No result	No result	No result	No result	Others	Others	C18H24N2O5	3	0.7346	23257-79-6	479536	457241	363801	216468	249932	236467	1.24098
MW0118724	2-Methyl-3-(pyrimidin-2-YL)propanoic acid	819850-14-1	No result	No result	No result	No result	No result	Organic acid and Its derivatives	Organic acid and Its derivatives	C8H10N2O2	3	0.6176	819850-14-1	829933	825032	904504	667922	651945	642125	1.26394
MW0156776	Ser-His-His-Val-Ala	No result	No result	No result	No result	No result	No result	Amino acid and Its metabolites	Small Peptide	C23H35N9O7	3	0.6248	-	357267	302896	289167	116751	126751	113558	1.28596
MW0004159	3,4-Dihydroxy-5-methoxybenzoic acid	3934-84-7	CHEBI:28647 CHEBI:19950	No result	C05616	No result	No result	Benzene and substituted derivatives	Benzene and substituted derivatives	C8H8O5	3	0.6504	3934-84-7	192895	178156	372457	31110.5	33349.2	89100.8	1.16092
MW0122765	Vergentan	59338-87-3 59338-93-1	No result	HMDB0015494	D07563 D07102	No result	No result	Heterocyclic compounds	Heterocyclic compounds	C16H21N5O2	3	0.6942	59338-93-1	248183	222069	222929	25244.3	38490.8	40956.4	1.2822
MW0008643	N-[2-(3,4-dimethoxyphenyl)ethyl]-3-(3-hydroxy-4-methoxyphenyl)propanamide							Benzene and substituted derivatives	Phenolics	C20H25NO5	3	0.832	-	279625	266760	211522	51736.7	61385.8	56568.4	1.28843
MW0153830	Methylcarbamyl PAF C-8	No result	No result	No result	No result	No result	No result	Aldehyde,Ketones,Esters	Esters	C18H39N2O7P	3	0.7151	-	397564	377089	336108	160793	176708	187459	1.27956
MW0007471	Labetalol	32780-64-6 36894-69-6 75659-07-3 83167-24-2 83167-32-2	CHEBI:6343	HMDB0014736	C07063 D08106	BPBio1_000170 BSPBio_000154 BSPBio_003142 IDI1_000474 Lopac0_000687 Prestwick2_000277 Prestwick3_000277 Spectrum5_001010	No result	Benzene and substituted derivatives	Benzene and substituted derivatives	C19H24N2O3	3	0.8278	36894-69-6 | 32780-40-8	306511	345815	300850	122073	122806	122824	1.29451
MW0061821	Pimelic acid	111-16-0 111-16-0	CHEBI:30531 CHEBI:36165 CHEBI:17774	HMDB0000857	C02656	No result	No result	Organic acid and Its derivatives	Organic acid and Its derivatives	C7H12O4	2	0.8102	111-16-0	206670	196892	190853	3886.17	3114.1	2246.86	1.29639
MW0152447	Leu-Phe-Glu							Amino acid and Its metabolites	Small Peptide	C20H29N3O6	3	0.756	-	210848	256058	253508	83991.6	40199.5	12099.7	1.12283
MW0000443	Simulanoquinoline	No result	No result	HMDB0040379	No result	No result	No result	Alkaloids	Alkaloids	C37H34N2O7	3	0.6501	155416-22-1	310902	283614	261118	80033.7	101765	90140.4	1.28526
MW0010628	Myricatomentoside I	No result	No result	HMDB0031536	No result	No result	No result	Benzene and substituted derivatives	Benzene and substituted derivatives	C26H32O10	3	0.7375	-	342158	214692	382870	125065	117006	113965	1.21496
MW0119764	3-Pyrimidin-2-yl-2-pyrimidin-2-ylmethyl-propionic acid	936643-76-4	No result	No result	No result	No result	No result	Organic acid and Its derivatives	Organic acid and Its derivatives	C12H12N4O2	3	0.7185	936643-76-4	915853	838088	674778	584966	639461	623215	1.05997
MW0054026	1-O-Acetylbritannilactone	No result	No result	No result	No result	No result	No result	Aldehyde,Ketones,Esters	Ketones	C17H24O5	3	0.6036	33627-41-7	343287	355813	330073	159493	148014	141031	1.29381
MW0152368	Leu-Ile-Asn							Amino acid and Its metabolites	Small Peptide	C16H30N4O5	3	0.7691	-	785225	730145	707857	543285	574735	526628	1.25635
MW0122896	Apixaban	503612-47-3	CHEBI:72296	No result	D03213	No result	No result	Heterocyclic compounds	Heterocyclic compounds	C25H25N5O4	3	0.6409	-	354867	331279	319545	126640	146012	155048	1.2837
MW0120713	4-Quinolone-3-Carboxamide Furan CB2 Agonist	No result	No result	No result	No result	No result	No result	Alcohol and amines	Amines	C30H36N2O4	3	0.7601	-	228586	242081	392823	97941.7	109047	79839.3	1.22231
MW0145822	Asn-Lys-Ala-Val-Gly	No result	No result	No result	No result	No result	No result	Amino acid and Its metabolites	Small Peptide	C20H37N7O7	3	0.7591	-	281136	282802	282260	92436.1	98944.8	79280	1.29145
MW0104567	2-amino-4-({1-[(carboxymethyl)-C-hydroxycarbonimidoyl]-2-{[(5R)-5,10,14,16-tetrahydroxy-5,9,11,13,13-pentamethyl-2-[1-(2-methyl-1,3-thiazol-4-yl)prop-1-en-2-yl]-12-oxo-1-azacyclohexadec-1(16)-en-4-yl]sulfanyl}ethyl}-C-hydroxycarbonimidoyl)butanoic acid							Others	Others	C37H59N5O11S2	3	0.5072	-	394435	415739	329878	570711	584719	559883	1.22877
MW0152521	Leu-Thr-Thr-Glu-Glu	No result	No result	No result	No result	No result	No result	Amino acid and Its metabolites	Small Peptide	C24H41N5O12	3	0.7301	-	696007	682339	618238	820958	867494	882257	1.23249
MW0149728	Gln-Ile-Tyr-Glu	No result	No result	No result	No result	No result	No result	Amino acid and Its metabolites	Small Peptide	C25H37N5O9	3	0.8905	-	1.03998e+06	1.04287e+06	918106	1.14857e+06	1.19441e+06	1230081	1.14933
MW0154036	Myxalamid D	86934-12-5	CHEBI:31875	No result	C12161	No result	No result	Others	Others	C23H35NO3	3	0.5224	-	245242	228309	221062	38768.9	45285.2	40287.9	1.29703
MW0137585	DL-Carbidopa	14585-65-0 28860-95-9 302-53-4 38821-49-7 40717-59-7	No result	No result	No result	BSPBio_003193 IDI1_000168 Spectrum5_001039	No result	Heterocyclic compounds	Heterocyclic compounds	C10H14N2O4	3	0.6256	-	621661	589039	578863	395602	418357	405787	1.28711
MW0106002	Beauvericin	26048-05-5 26048-05-5	No result	No result	C11590	No result	No result	Benzene and substituted derivatives	Benzene and substituted derivatives	C45H57N3O9	3	0.8622	26048-05-5	277312	184443	155093	16979.1	4426.87	26487.8	1.20457
MW0012469	15-Keto Travoprost	404830-45-1	No result	No result	No result	No result	No result	Hormones and hormone related compounds	Hormones and hormone related compounds	C26H33F3O6	3	0.8318	404830-45-1	173702	210763	214437	13860.3	8290.82	9423.91	1.29208
MW0055906	[(2R)-2-(12-methyltetradecanoyloxy)-3-phosphonooxypropyl] icosanoate							GP	PA	C38H75O8P	2	0.9288	-	183964	256596	379676	420595	481095	483797	1.03795
MW0052330	Dienogest	65928-58-7 67969-94-2	CHEBI:70708	No result	D03799	No result	No result	Aldehyde,Ketones,Esters	Ketones	C20H25NO2	3	0.689	65928-58-7	860030	866229	799605	925515	1.11671e+06	1048559	1.11199
MW0114156	Fructose	7776-48-9	No result	No result	No result	No result	No result	Carbohydrates and Its metabolites	Sugars	C6H12O6	2	0.8444	57-48-7 | 30237-26-4 | 25702-76-5 | 139686-85-4	462587	364071	509881	263872	252761	255571	1.2174
FDATN01488	L-Glutamic acid	56-86-0 617-65-2 84960-48-5	CHEBI:16015 CHEBI:53374	HMDB0000148	C00025 D00007	BPBio1_001132 Biomol-NT_000170 HSCI1_000269 Lopac0_000529 PDSP1_000128 PDSP1_001539 PDSP2_000127 PDSP2_001523	No result	Amino acid and Its metabolites	Amino acids	C5H9NO4	2	0.9705	56-86-0	646302	659002	624698	377346	491633	497465	1.15176
MW0063689	Strictosidine	20824-29-7 2372-96-5 23730-24-7	CHEBI:17559	No result	C03470	No result	No result	Alkaloids	Alkaloids	C27H34N2O9	2	0.921	20824-29-7	492700	519417	477289	395108	321677	210618	1.04737
MW0168683	Aconitic acid	4023-65-8 499-12-7 585-84-2 4023-65-8 499-12-7 585-84-2 60301-98-6	CHEBI:22211 CHEBI:32805 CHEBI:32806	HMDB0000072 HMDB0000958	C00417 C02341	BSPBio_003135 Spectrum5_000568	No result	Organic acid and Its derivatives	Organic acid and Its derivatives	C6H6O6	2	0.971	-	268061	225968	214020	64252.8	34881	49702.8	1.2655
MEDN1006	Uric acid	13154-20-6 42911-27-3 69-93-2	CHEBI:17775 CHEBI:62589	HMDB0000289	C00366	No result	No result	Organic acid and Its derivatives	Organic acid and Its derivatives	C5H4N4O3	1b	0.7972	69-93-2	263779	242619	141822	33700.6	28035.3	27335.9	1.27282
MW0123493	Dauricine	524-17-4 5340-56-7	CHEBI:4331	No result	C09419	No result	No result	Heterocyclic compounds	Heterocyclic compounds	C38H44N2O6	3	0.8581	524-17-4	398618	354882	367568	158688	197969	206847	1.25819
MW0114304	Maltose	133-99-3 69-79-4 73824-72-3 814-71-1 6363-53-7 4482-75-1 9005-84-9 13360-52-6 14417-51-7 14641-93-1 20869-27-6 28072-80-2 35438-40-5 528-50-7 5965-66-2 5989-81-1 63-42-3 6363-53-7 64044-51-5 69-79-4 80446-85-1 84819-87-4	CHEBI:18147 CHEBI:17306 CHEBI:18167 CHEBI:47937	HMDB0037138 HMDB0000163	C01971 C00208 D00044 C00897	No result	No result	Carbohydrates and Its metabolites	Sugars	C12H22O11	2	0.9397	69-79-4	1.39972e+06	1.34989e+06	1.20491e+06	1.42832e+06	1.5295e+06	1.55415e+06	1.02481
MW0114021	Buphedrone	408332-79-6	No result	No result	No result	No result	No result	Aldehyde,Ketones,Esters	Ketones	C11H15NO	3	0.5911	408332-79-6	403129	315937	281679	132165	153233	158319	1.24609
MW0112561	3,4,5-trihydroxy-6-{[(16R)-5,7,11-trihydroxy-8,8,10,16-tetramethyl-3-[1-(2-methyl-1,3-thiazol-4-yl)prop-1-en-2-yl]-9-oxo-17-oxa-4-azabicyclo[14.1.0]heptadec-4-en-12-yl]methoxy}oxane-2-carboxylic acid							Benzene and substituted derivatives	Benzene and substituted derivatives	C33H50N2O12S	3	0.7846	-	584394	504811	479959	315146	347791	349490	1.24068
MW0155692	Precorrin 8	No result	No result	No result	No result	No result	No result	Heterocyclic compounds	Heterocyclic compounds	C45H60N4O14	3	0.5374	-	432450	212198	134750	127639	36436.8	59097.9	1.02532
MW0150614	Rubschisandrin							Heterocyclic compounds	Heterocyclic compounds	C23H28O6	3	0.622	82467-51-4 | 61281-37-6 | 713102-92-2	180896	279149	250038	480531	505398	279081	1.00392
MW0126011	Oxyphencyclimine	125-52-0 125-53-1 3483-39-4	CHEBI:7868	HMDB0014527	C07851 D08325	BSPBio_003391 IDI1_000876 Spectrum5_001499	No result	Heterocyclic compounds	Heterocyclic compounds	C20H28N2O3	3	0.5815	125-53-1	268159	244219	211753	74581.9	52370.3	43131.3	1.26588
MW0152048	Strophanthin	560-53-2 6343-54-0 560-53-2	CHEBI:80753	No result	C16820	No result	No result	Heterocyclic compounds	Heterocyclic compounds	C36H54O14	3	0.5223	-	794622	731520	721951	557615	582612	554268	1.26394
MW0126940	Vasicine	6159-55-3 18549-38-7 50591-64-5 6159-56-4 73609-36-6 6159-55-3	CHEBI:7949	No result	C10733	No result	No result	Heterocyclic compounds	Heterocyclic compounds	C11H12N2O	3	0.7227	18549-38-7	293050	343932	178893	34707.2	188180	40112	1.00498
MW0107745	Leu-Phe	No result	CHEBI:73585	No result	No result	No result	No result	Amino acid and Its metabolites	Small Peptide	C15H22N2O3	3	0.6931	-	212325	214049	218294	27172.2	34116.2	32509.6	1.29619
MW0063434	Santonine, oxime	1618-82-2	No result	No result	No result	No result	No result	Terpenoids	Sesquiterpenoids	C15H19NO3	3	0.5969	1618-82-2	362534	379335	399108	185505	198874	211389	1.28609
MEDP1060	Hydroxyquinoline	123574-67-4 134-30-5 148-24-3 6329-08-4 8067-69-4	CHEBI:48981	No result	C19434 D04415 D05321	BSPBio_002147 IDI1_000757 Spectrum5_001280	No result	Heterocyclic compounds	Heterocyclic compounds	C9H7NO	2	0.9401	148-24-3	717647	705983	754156	926974	908821	886086	1.27136
MW0143772	6alpha-Hydroxycortisol	2242-98-0 22561-27-9	CHEBI:79793	No result	C15291	No result	No result	Aldehyde,Ketones,Esters	Ketones	C21H30O6	3	0.5651	2242-98-0	362718	329614	281759	133908	146849	149357	1.27481
MW0145565	Arg-Val-Ile-Trp-Gly	No result	No result	No result	No result	No result	No result	Amino acid and Its metabolites	Small Peptide	C30H47N9O6	3	0.7588	-	352747	335787	232534	127551	118888	132289	1.24248
MW0152387	Leu-Ile-Tyr-Thr-Asn	No result	No result	No result	No result	No result	No result	Amino acid and Its metabolites	Small Peptide	C29H46N6O9	3	0.7731	-	274448	261760	230856	62512.1	80921.2	81509.4	1.28214
MW0151447	Ile-His-Asn-Glu							Amino acid and Its metabolites	Small Peptide	C21H33N7O8	3	0.7506	-	141852	236859	131769	264205	405839	381487	1.10867
MEDL00439	Lactic acid	10326-41-7 163894-00-6 1715-99-7 31587-11-8 50-21-5 598-82-3 79-33-4 86044-59-9 113-21-3 27871-49-4 28716-53-2 50-21-5	CHEBI:78320	HMDB0144295	No result	No result	No result	Organic acid and Its derivatives	Organic acid and Its derivatives	C3H6O3	2	0.9092	50-21-5 | 26100-51-6 | 598-82-3 | 26811-96-1	559496	545994	541743	703474	730992	752234	1.28532
MW0107369	Hoiamide C	No result	No result	No result	No result	No result	No result	Alcohol and amines	Amines	C37H62N4O7S3	3	0.718	-	221536	246746	186372	45461.4	34832.8	40841.3	1.28909
MW0005796	6-beta-Naltrexol	No result	No result	HMDB0060784	No result	No result	No result	Benzene and substituted derivatives	Benzene and substituted derivatives	C20H25NO4	3	0.7487	-	464998	556987	413598	328808	260702	314088	1.17053
MW0054720	3-Hydroxymethylglutaric acid	503-49-1	CHEBI:16831	HMDB0000355 HMDB0059737	C03761 D04897	ACon1_000502 MEGxp0_001907	No result	Organic acid and Its derivatives	Organic acid and Its derivatives	C6H10O5	2	0.904	503-49-1	279280	282121	517222	169400	201523	175736	1.08383
MW0111263	Pramipexole	104632-26-0	CHEBI:8356	HMDB0014557	D05575	Spectrum5_001453	No result	Heterocyclic compounds	Heterocyclic compounds	C10H17N3S	3	0.7514	104632-26-0	167745	191454	223320	22174	14984.6	13451.7	1.28773
MW0109524	Ramipril	87333-19-5	CHEBI:8774	HMDB0014324	D00421	BSPBio_003347 Spectrum5_001721	No result	Others	Medicine	C23H32N2O5	3	0.7216	87333-19-5	469481	386026	383493	294243	237518	175622	1.13272
MW0151026	His-Met-Glu	No result	No result	No result	No result	No result	No result	Amino acid and Its metabolites	Small Peptide	C16H25N5O6S1	3	0.7588	-	417964	425070	370915	535937	595766	613538	1.23618
MW0110025	Triethyl citrate							Aldehyde,Ketones,Esters	Esters	C12H20O7	3	0.5606	77-93-0	148763	148357	144770	371312	183490	417332	1.06058
MW0155880	Pro-His-Ile							Amino acid and Its metabolites	Small Peptide	C17H27N5O4	3	0.7053	-	234957	204701	277369	67285.1	50283.7	71952.6	1.27232
MW0155993	Pro-Ser-Leu							Amino acid and Its metabolites	Small Peptide	C14H25N3O5	3	0.755	-	270849	176969	148085	31161.5	12239.8	26870.1	1.24208
MW0145461	Arg-Phe-Gln							Amino acid and Its metabolites	Small Peptide	C20H31N7O5	3	0.737	-	292679	269574	266301	105331	110374	90540.3	1.28857
MW0144590	Ala-His-Gly-Val-Asp	No result	No result	No result	No result	No result	No result	Amino acid and Its metabolites	Small Peptide	C20H31N7O8	3	0.7481	-	211822	202483	190573	7802.33	26124.6	49619.9	1.16704
MW0155362	Phe-Thr-Tyr							Amino acid and Its metabolites	Small Peptide	C22H27N3O6	3	0.7318	-	268306	254076	230388	72912.8	84523.7	75236.5	1.29226
MW0145816	Asn-Leu-Ser-Phe-Gln	No result	No result	No result	No result	No result	No result	Amino acid and Its metabolites	Small Peptide	C27H41N7O9	3	0.6968	-	226972	211588	210214	53557.1	40957.7	35416.3	1.28577
MW0112941	4-(2-Aminophenyl)-2,4-dioxobutanoic acid	No result	CHEBI:17442 CHEBI:58147	HMDB0000978	C01252	No result	No result	Organic acid and Its derivatives	Organic acid and Its derivatives	C10H9NO4	3	0.5394	90924-76-8	333680	181186	146466	47019.4	50737.5	46445.6	1.23115
MW0013684	Chaps	75621-03-3	CHEBI:1418	No result	C11321	No result	No result	Aldehyde,Ketones,Esters	Esters	C32H58N2O7S	3	0.8878	75621-03-3	309086	291584	258339	109426	117760	114856	1.29
MW0115294	Glucosinalbin	19253-84-0	No result	No result	No result	No result	No result	Organic acid and Its derivatives	Sulfonic acids	C14H19NO10S2	3	0.5925	19253-84-0 | 20196-67-2	274068	266503	234241	80399.5	95766.3	82058.5	1.28826
MW0157541	Thr-Ala-Val-Asp	No result	No result	No result	No result	No result	No result	Amino acid and Its metabolites	Small Peptide	C16H28N4O8	3	0.7048	-	279264	312847	304221	176512	67551.7	135732	1.10777
MW0109274	Pipecolic acid	119678-10-3 1723-00-8 3105-95-1 4043-87-2 5107-10-8 535-75-1 83680-83-5 89283-08-9 98-98-6	CHEBI:17964	HMDB0000070 HMDB0062767	No result	No result	No result	Organic acid and Its derivatives	Organic acid and Its derivatives	C6H11NO2	2	0.9425	535-75-1	615058	608248	569587	404750	440415	433821	1.27184
MW0144376	Adiantifoline	20823-96-5 24314-87-2 2811-31-6	CHEBI:2487	No result	C09323	No result	No result	Alkaloids	Alkaloids	C42H50N2O9	3	0.7628	20823-96-5	214567	190467	176368	3269.86	41726.9	22746.3	1.11402
MW0006039	Amprenavir	161814-49-9	No result	HMDB0014839	C08086 D00894	No result	No result	Benzene and substituted derivatives	Benzene and substituted derivatives	C25H35N3O6S	3	0.6031	161814-49-9	212180	208176	185700	39384.5	34083.6	18984.2	1.26579
MW0155844	Pro-Glu-Ala-Gln-Lys	No result	No result	No result	No result	No result	No result	Amino acid and Its metabolites	Small Peptide	C24H41N7O9	3	0.7592	-	267142	249176	213487	60618.7	86597.3	69299.8	1.27362
MW0115142	Phytic acid	50762-79-3 83-86-3 89602-25-5	No result	HMDB0003502 HMDB0060271	No result	No result	No result	Organic acid and Its derivatives	Organic acid and Its derivatives	C6H18O24P6	3	0.6094	83-86-3	274603	237044	210026	64183.2	75346.6	73117.2	1.28525
MW0145329	Arg-Gln-Met							Amino acid and Its metabolites	Small Peptide	C16H31N7O5S1	3	0.7464	-	291662	274368	239849	122757	115110	59082.2	1.18142
MEDP1879	Phe-ala	3918-87-4	CHEBI:73630	No result	No result	No result	No result	Amino acid and Its metabolites	Amino acid derivatives	C12H16N2O3	3	0.8942	3918-87-4	374485	235574	221238	150477	98399.5	75368.7	1.14241
MADN0569	D-Saccharic Acid 1,4-lactone (hydrate)	389-36-6 61278-30-6	No result	No result	No result	No result	No result	Organic acid and Its derivatives	Organic acid and Its derivatives	C6H8O7	3	0.7276	61278-30-6	127599	362914	220684	54606.2	75667.9	75252.8	1.13753
MW0149627	Gln-Arg-Phe							Amino acid and Its metabolites	Small Peptide	C20H31N7O5	3	0.721	-	349934	346052	140544	94783.5	155815	80437.9	1.00742
MW0158106	Trp-Asn-Leu							Amino acid and Its metabolites	Small Peptide	C21H29N5O5	3	0.7351	-	271467	276233	274908	52568.8	137886	127112	1.11397
MW0126835	Tozasertib	639089-54-6 936915-58-1	No result	No result	D08279	No result	No result	Heterocyclic compounds	Heterocyclic compounds	C23H28N8OS	3	0.8894	639089-54-6	168536	158198	391175	70759.3	72074.8	72419.4	1.15053
MW0155166	Phe-Gln-Phe-Phe-Lys	No result	No result	No result	No result	No result	No result	Amino acid and Its metabolites	Small Peptide	C38H49N7O7	3	0.7322	-	363653	337473	298910	109155	219428	168805	1.12449
MW0144288	aclacinomycin S							Aldehyde,Ketones,Esters	Ketones	C36H45NO13	3	0.5782	64431-69-2	171183	184097	140966	323224	311479	361737	1.25751
MW0145850	Asn-Phe-Ala-Arg	No result	No result	No result	No result	No result	No result	Amino acid and Its metabolites	Small Peptide	C22H34N8O6	3	0.7009	-	283639	250106	228886	79627.3	77462.6	106168	1.26929
MW0145281	Arg-Asn-Phe							Amino acid and Its metabolites	Small Peptide	C19H29N7O5	3	0.7503	-	465850	434488	478698	250561	350186	279033	1.18423
MW0109516	R-1 Methanandamide Phosphate	No result	No result	No result	No result	No result	No result	Alcohol and amines	Amines	C23H40NO5P	3	0.8103	649569-33-5	212081	226268	188634	46931.7	35901.2	45195.3	1.2905
MW0124123	Flibanserin	167933-07-5	No result	No result	D02577	No result	No result	Others	Medicine	C20H21F3N4O	3	0.7969	-	178915	172729	160373	2277.49	6406.1	4547.43	1.2821
MEDTN00896	N-acetyl-5-aminosalicylic acid	51-59-2	No result	HMDB0060602	No result	IDI1_014653 Oprea1_150410 Oprea1_590376	No result	Benzene and substituted derivatives	Benzene and substituted derivatives	C9H9NO4	3	0.6503	51-59-2	368764	188013	347399	90545.2	205365	110842	1.01374
MW0109629	Ser-phe	16875-28-8	CHEBI:71029	No result	No result	No result	No result	Amino acid and Its metabolites	Small Peptide	C12H16N2O4	3	0.819	16875-28-8	385126	390988	351597	187702	229589	214768	1.26502
MW0109820	2,3,4,5-Tetrahydropyridine-2,6-dicarboxylic acid							Organic acid and Its derivatives	Organic acid and Its derivatives	C7H9NO4	3	0.6905	2353-17-5	521404	489933	348551	573030	648507	633782	1.01158
MW0158819	-UR-144 N-(4-hydroxypentyl) metabolite	No result	No result	No result	No result	No result	No result	Amino acid and Its metabolites	polypeptide	C21H29NO2	3	0.6989	-	704596	596091	506919	424078	448963	439722	1.10512
MW0108873	Nodularin	118399-22-7	CHEBI:80043	No result	C15713	No result	No result	Heterocyclic compounds	Heterocyclic compounds	C41H60N8O10	3	0.7549	118399-22-7	242027	232770	246275	70247.1	74733.1	81594.2	1.29553
FDATN01406	Pirenzepine hydrochloride	28797-61-7 29868-97-1 98985-22-9	CHEBI:32014	No result	D01297	No result	No result	Others	Medicine	C19H23Cl2N5O2	3	0.742	29868-97-1	392452	346601	227204	181156	195323	96343.9	1.0369
MW0152556	Leu-Val-Ala-Glu	No result	No result	No result	No result	No result	No result	Amino acid and Its metabolites	Small Peptide	C19H34N4O7	3	0.7314	-	283306	282386	177348	124228	63282.2	63991.5	1.17022
MEDP1611	Glutamylglutamine	No result	No result	HMDB0028817	No result	No result	No result	Amino acid and Its metabolites	Small Peptide	C10H17N3O6	2	0.8036	26848-14-6	671456	653871	561407	447898	467227	480631	1.20802
MW0149998	Glu-Glu-Phe-Leu-Val	No result	No result	No result	No result	No result	No result	Amino acid and Its metabolites	Small Peptide	C30H45N5O10	3	0.7375	-	274754	414048	403132	232752	218102	151076	1.09833
FDATN01148	Eliglustat	491833-29-5	CHEBI:82752	No result	D09893	No result	No result	Others	Medicine	C23H36N2O4	3	0.5843	491833-29-5	348430	318488	293761	145817	166605	159337	1.27968
MW0062176	Prieuranin acetate	No result	No result	No result	No result	BSPBio_001687 Spectrum5_000089	No result	Terpenoids	Triterpene	C40H52O17	3	0.6793	-	585723	447368	467720	606463	694970	687715	1.08735
MW0152982	Lys-His-Ala-Val-Ser	No result	No result	No result	No result	No result	No result	Amino acid and Its metabolites	Small Peptide	C23H40N8O7	3	0.681	-	266319	163516	179251	36824.5	43742.3	40419.1	1.27519
MW0016023	Azelaic acid	123-99-9 32733-99-6 123-99-9	No result	HMDB0000784	C08261 D03034			Organic acid and Its derivatives	Organic acid and Its derivatives	C9H16O4	2	0.9714	123-99-9	401676	396918	359599	513831	594859	536717	1.23942
MW0109854	Thr-arg hemisulfate salt	108320-96-3	No result	No result	No result	No result	No result	Amino acid and Its metabolites	Small Peptide	C20H44N10O12S	3	0.7445	108320-96-3	519568	449764	442680	291060	326549	307203	1.24861
MW0146315	Asp-Val-Asn-His-Phe	No result	No result	No result	No result	No result	No result	Amino acid and Its metabolites	Small Peptide	C28H38N8O9	3	0.7274	-	153415	309577	109336	31189.2	9738.16	44776.4	1.13652
MW0150635	(1R,7S,11S,13S,19S,20R,23R)-5,15,19,23-tetrahydroxy-13,20-dimethyl-8,12,21-trioxahexacyclo[17.2.2.02,18.04,16.06,14.07,11]tricosa-2(18),4,6(14),15-tetraene-3,9,17-trione							Benzene and substituted derivatives	Benzene and substituted derivatives	C22H20O10	3	0.7584	-	211277	192317	176688	49410.6	22269.8	22787.2	1.25222
MW0159185	Val-Thr-Phe-Glu-Ser							Amino acid and Its metabolites	Small Peptide	C26H39N5O10	3	0.7866	-	66499.4	78518.4	57545.6	197870	215018	273017	1.27077
MW0115265	Sedoheptulose 7-phosphate	2646-35-7	CHEBI:15721	No result	C05382	No result	No result	Carbohydrates and Its metabolites	Phosphate sugars	C7H15O10P	3	0.6564	2646-35-7	342402	182998	233190	61005	86380.7	127957	1.13884
MW0107023	Glu-Tyr	No result	CHEBI:73513	HMDB0028831	No result	No result	No result	Amino acid and Its metabolites	Small Peptide	C14H18N2O6	3	0.5877	3422-39-7	397474	378382	371074	217855	230397	218486	1.29324
MW0002154	2,3-Dihydro-4-(4-methoxyphenyl)-1H-phenalene-1,2,3-triol							Benzene and substituted derivatives	Benzene and substituted derivatives	C20H18O4	3	0.7902	163811-78-7	108612	112169	113305	265010	271813	276090	1.2991
MW0000490	Pseudomorphine	125-24-6	No result	HMDB0031751	No result	No result	No result	Alkaloids	Isoquinoline alkaloids	C34H36N2O6	2	0.9162	125-24-6	195683	142964	176311	10417.4	4851.02	20977.4	1.24304
MW0063341	Rhizoxin	90996-54-6	CHEBI:72590	No result	No result	No result	No result	Heterocyclic compounds	Heterocyclic compounds	C35H47NO9	2	0.9406	90996-54-6	212864	198434	182006	32878.3	41516.2	42008.6	1.29144
MW0155271	Phe-Lys-Glu-Ala-Phe							Amino acid and Its metabolites	Small Peptide	C32H44N6O8	3	0.8448	-	328942	316148	304134	479056	470993	475520	1.29129
MEDL00655	Sunitinib	326914-13-0 341031-54-7 342641-94-5 557795-19-4	No result	HMDB0015397	D08552	No result	No result	Others	Medicine	C22H27FN4O2	2	0.8743	557795-19-4	166041	264144	194530	60466.9	33602.4	54440.9	1.24167
MEDL02046	2-Indolecarboxylic acid							Heterocyclic compounds	Indole and Its derivatives	C9H7NO2	3	0.6183	1477-50-5	158727	89704	84649	193648	390948	223808	1.0831
MW0110625	1-O-Hexadecyl-2-deoxy-2-thio-S-acetyl-sn-glyceryl-3-phosphorylcholine	96801-55-7	No result	No result	No result	No result	No result	Organic acid and Its derivatives	Phosphoric acids	C26H54NO6PS	3	0.7565	-	468457	431511	428493	585739	608494	608655	1.27364
MW0137927	De-O-methylsterigmatocystin	No result	No result	HMDB0033657	No result	No result	No result	Heterocyclic compounds	Heterocyclic compounds	C17H10O6	3	0.8385	30461-65-5	205172	189585	152397	21823.3	27128.8	24857.3	1.29211
MW0140515	(D-Pen2,D-Pen5)-Enkephalin							Amino acid and Its metabolites	polypeptide	C30H39N5O7S2	3	0.7509	88373-73-3	207859	154174	153496	296778	307088	382879	1.20998
MW0148706	dTDP-2,3,6-trideoxy-3-C-methyl-4-O-methyl-3-nitroso-beta-L-arabino-hexopyranose							Nucleotide and Its metabolites	Nucleotide and Its metabolites	C18H29N3O14P2	3	0.5497	-	27693.3	18954.9	24041.8	160453	193319	188130	1.29059
MW0106855	Gln-Ile	No result	No result	HMDB0028800	No result	No result	No result	Amino acid and Its metabolites	Small Peptide	C11H21N3O4	3	0.7042	86416-45-7	427144	165675	167825	78946.1	112438	98236.6	1.03568
MW0049009	Corchorifatty acid F	No result	No result	No result	No result	No result	No result	FA	Oxidized lipids	C18H32O5	2	0.9253	95341-44-9	399380	373981	353148	206143	225276	224373	1.28136
MW0146034	Asp-Arg-Val-Lys-Asp	No result	No result	No result	No result	No result	No result	Amino acid and Its metabolites	Small Peptide	C25H45N9O10	3	0.8078	-	295444	228973	190970	94306.9	112987	37497.8	1.10103
MW0012405	15(S)-Fluprostenol	40666-16-8 54276-17-4 75330-75-5	No result	No result	No result	No result	No result	FA	Others	C23H29F3O6	2	0.9328	-	236968	196150	195468	61906.8	33760.3	63049.3	1.24473
MW0146816	Boc-Phe(NMe)-Pro-Phe(NMe)-Gly-OMe	No result	No result	No result	No result	No result	No result	Others	Others	C33H44N4O7	3	0.6981	-	213484	352344	268438	119410	126313	121579	1.22091
MW0153282	Lys-TyrMe-OH	No result	No result	No result	No result	No result	No result	Amino acid and Its metabolites	Small Peptide	C21H25N3O7	3	0.701	-	931773	915394	868653	764539	708557	775816	1.21979
MW0106598	Epinephrine sulfate	77469-50-2	No result	HMDB0001876	No result	No result	No result	Others	Others	C9H13NO6S	3	0.7349	77469-50-2	383493	356481	300381	171006	215772	186988	1.23257
MW0014380	4-{[(4S,5R,6E,8E,10Z,13Z)-1-carboxy-4-hydroxynonadeca-6,8,10,13-tetraen-5-yl]sulfanyl}benzoic acid							CoEnzyme and vitamins	CoEnzyme and vitamins	C27H36O5S	3	0.8176	154978-38-8	1.15949e+06	1.16464e+06	1.01441e+06	1.22841e+06	1.31036e+06	1.26627e+06	1.04522
MW0146059	Asp-Asp-Phe-Gln-Lys							Amino acid and Its metabolites	Small Peptide	C28H41N7O11	3	0.6695	-	56898.8	47349.9	71860.1	195301	180393	264926	1.25824
MW0119361	31-Hydroxy rifabutin							Heterocyclic compounds	Heterocyclic compounds	C46H62N4O12	3	0.5066	-	208480	192564	167769	52499.5	20987.3	31687.9	1.24296
MW0151370	Ile-Asp-Lys-Lys	No result	No result	No result	No result	No result	No result	Amino acid and Its metabolites	Small Peptide	C22H42N6O7	3	0.8102	-	149853	185712	231423	37003	35126.7	31712.5	1.28381
MW0108082	Lys-Tyr	No result	CHEBI:73608	No result	No result	No result	No result	Amino acid and Its metabolites	Small Peptide	C15H23N3O4	3	0.6247	35978-98-4	280074	243091	253131	100707	108323	105645	1.29273
MW0156621	Ser-Ala-Asn-Asp	No result	No result	No result	No result	No result	No result	Amino acid and Its metabolites	Small Peptide	C14H23N5O9	3	0.8243	-	728596	688417	627041	509311	532814	541091	1.21789
MW0159133	Val-Pro-Ala	No result	No result	No result	No result	No result	No result	Amino acid and Its metabolites	Small Peptide	C13H23N3O4	3	0.7516	-	485370	451539	371676	272963	284507	290702	1.21444
MW0124592	2-(4-chlorophenyl)-1-(1-pentyl-1H-indol-3-yl)ethanone	No result	No result	No result	No result	No result	No result	Aldehyde,Ketones,Esters	Ketones	C21H22ClNO	3	0.8562	864445-58-9	229579	201943	222472	62463.4	71844.2	60877.6	1.29241
MW0158562	Tyr-Phe-Asn							Amino acid and Its metabolites	Small Peptide	C22H26N4O6	3	0.822	-	208725	207718	181998	85991.5	39477.1	16543	1.1262
MW0107049	H-Gly-ala-phe-OH	17922-87-1	No result	No result	No result	No result	No result	Amino acid and Its metabolites	Small Peptide	C14H19N3O4	3	0.6275	17922-87-1	299963	355560	316522	179310	187357	149323	1.25508
MW0151550	Ile-Phe-Trp							Amino acid and Its metabolites	Small Peptide	C26H32N4O4	3	0.7011	-	218419	279516	377259	156100	112922	151203	1.15138
MW0104285	2-amino-3-(1-methyl-1H-imidazol-4-yl)propanoic acid							Organic acid and Its derivatives	Organic acid and Its derivatives	C7H11N3O2	3	0.7687	28095-60-5	151017	136603	104672	290444	285031	270937	1.24943
MW0148261	Demethyllactenocin	No result	CHEBI:29572	No result	C12003	No result	No result	Heterocyclic compounds	Heterocyclic compounds	C37H61NO14	3	0.6688	-	229986	191740	165335	62451.3	56186.4	14334.4	1.12399
MW0103552	Edoxudine	15176-29-1 46895-01-6	No result	No result	D03956	No result	No result	Nucleotide and Its metabolites	Nucleotide and Its metabolites	C11H16N2O5	3	0.7474	15176-29-1 | 69264-36-4	502145	487670	431415	307343	320833	339787	1.24961
MW0103654	Riboprine	33156-15-9 7724-76-7	CHEBI:62881	No result	D05726	No result	No result	Nucleotide and Its metabolites	Nucleotide and Its metabolites	C15H21N5O4	3	0.8457	7724-76-7	197155	177249	153306	14498.7	43980.2	16142.6	1.22726
MW0194043	Leurocristine	2068-78-2 28379-27-3 57-22-7 57-22-7	CHEBI:28445	HMDB0014681	C07204 D08679	No result	No result	Alkaloids	Alkaloids	C46H56N4O10	2	0.9131	57-22-7 | 132142-73-5	269954	305915	282377	122668	150852	131659	1.27672
MEDN0429	3-Hydroxyhippuric acid	1637-75-8	CHEBI:70824	HMDB0006116	No result	No result	No result	Amino acid and Its metabolites	Amino acid derivatives	C9H9NO4	1b	0.5332	1637-75-8	262066	119947	95404.4	10131.9	4849.35	10339.8	1.25516
MW0146818	Boc-Pro-Phe(NMe)-Gly-OMe	No result	No result	No result	No result	No result	No result	Others	Others	C23H33N3O6	3	0.6155	-	180050	182867	199184	31398.9	24032.3	54606.4	1.24912
MW0158578	Tyr-Phe-Thr-Lys	No result	No result	No result	No result	No result	No result	Amino acid and Its metabolites	Small Peptide	C28H39N5O7	2	0.9407	-	240733	223120	201606	58942.5	73922.9	81256.5	1.27659
MW0145948	Asn-Val-Glu-Glu	No result	No result	No result	No result	No result	No result	Amino acid and Its metabolites	Small Peptide	C19H31N5O10	3	0.7566	-	369791	307561	361698	184468	216617	187525	1.25353
MW0151624	Ile-Tyr-Glu							Amino acid and Its metabolites	Small Peptide	C20H29N3O7	3	0.7417	-	283381	214475	343682	130454	131584	130301	1.21976
MW0107031	Glycyl-tyrosyl-tyrosyl-prolyl-threonine	142155-24-6 16789-56-3	No result	No result	No result	No result	No result	Amino acid and Its metabolites	polypeptide	C29H37N5O9	3	0.6053	142155-24-6	241599	208738	190093	57551.2	65442.1	69203.1	1.28587
MW0109068	Pentobarbital	5767-32-8 76-74-4	CHEBI:7983	HMDB0014457	C07422 D00499	BSPBio_003305 IDI1_000992 Oprea1_143902 Oprea1_775730 Spectrum5_001705	No result	Heterocyclic compounds	Heterocyclic compounds	C11H18N2O3	3	0.6608	76-74-4 | 57-33-0 | 30849-50-4	305810	283817	274717	135540	139673	140960	1.29439
MW0109199	Phenylalanylasparagine							Amino acid and Its metabolites	Small Peptide	C13H17N3O4	3	0.6965	-	255765	245455	192090	361873	386383	392873	1.22008
MEDN0701	Itaconic acid	144368-21-8 25119-64-6 598-10-7 97-65-4	CHEBI:30838	HMDB0002092	C00490	Probes1_000076 Probes2_000247	No result	Organic acid and Its derivatives	Organic acid and Its derivatives	C5H6O4	2	0.9165	97-65-4	191589	210145	200739	29389.6	51586.6	73896.7	1.2145
MW0141403	[(1S,2R,3R,4S,5S,6S,8R,9S,10S,13S,16S,17R,18S)-11-ethyl-4,8,9-trihydroxy-6,16,18-trimethoxy-11-azahexacyclo[7.7.2.12,5.01,10.03,8.013,17]nonadecan-13-yl]methyl 2-[(3S)-3-methyl-2,5-dioxopyrrolidin-1-yl]benzoate							Benzene and substituted derivatives	Benzene and substituted derivatives	C36H48N2O10	3	0.6782	119347-24-9	277231	137831	171199	103600	17341.8	18132.2	1.065
MW0154304	Narcissidine	No result	CHEBI:31896	No result	C12184	No result	No result	Heterocyclic compounds	Heterocyclic compounds	C18H23NO5	3	0.7379	-	712550	738625	761832	621819	614641	531398	1.17342
MW0126017	Paliperidone							Aldehyde,Ketones,Esters	Ketones	C23H27FN4O3	3	0.8416	144598-75-4	170033	267005	243057	368386	384305	372347	1.14954
MW0048988	Columbaridione	No result	No result	No result	No result	No result	No result	Amino acid and Its metabolites	Small Peptide	C20H24O5	3	0.6989	-	271567	269331	223116	133752	120794	67089.6	1.16533
MW0152477	Leu-Ser-Ala-Asp	No result	No result	No result	No result	No result	No result	Amino acid and Its metabolites	Small Peptide	C16H28N4O8	3	0.8708	-	646956	665840	688110	521501	541322	497190	1.26246
FDATN00100	Stavudine	3056-17-5	CHEBI:63581	HMDB0014787	C07312 D00445	Lopac0_000336	No result	Nucleotide and Its metabolites	Nucleotide and Its metabolites	C10H12N2O4	3	0.807	3056-17-5	449754	456255	361202	239513	272718	314457	1.15747
MW0107439	Ile-Glu-Lys	No result	No result	No result	No result	No result	No result	Amino acid and Its metabolites	Small Peptide	C17H32N4O6	3	0.7957	-	423006	393597	366296	233846	269060	242104	1.25882
MW0010046	Verapamil	152-11-4 23313-68-0 38099-34-2 52-53-9 56949-77-0	CHEBI:77733	HMDB0001850	C07188	BPBio1_000268 BSPBio_000242 BSPBio_001513 BSPBio_002358 Bio1_000425 Bio1_000914 Bio1_001403 Bio2_000233 Bio2_000713 IDI1_000399 IDI1_033983 Lopac0_001237 Prestwick2_000141 Prestwick3_000141 Spectrum5_001786 cMAP_000023	No result	Benzene and substituted derivatives	Benzene and substituted derivatives	C27H38N2O4	3	0.7998	52-53-9	348900	347542	314051	173889	188979	213951	1.26175
MW0153653	Met-Pro-Thr-Phe-Gln	No result	No result	No result	No result	No result	No result	Amino acid and Its metabolites	Small Peptide	C28H42N6O8S	3	0.7584	-	296555	267866	272428	109632	113721	180369	1.19259
MW0115536	Glucose	2280-44-6 492-62-6 50-99-7 96553-96-7	No result	HMDB0000122	C00031 D00009	No result	No result	Carbohydrates and Its metabolites	Sugars	C6H12O6	2	0.8067	-	1.10964e+06	1.0877e+06	1.05615e+06	915314	972993	932369	1.23614
MW0153885	Methionylvaline	14486-13-6	No result					Amino acid and Its metabolites	Small Peptide	C10H20N2O3S	3	0.7169	14486-13-6	426671	381805	305343	506796	521509	517228	1.12083
MW0151419	Ile-Glu-Leu							Amino acid and Its metabolites	Small Peptide	C17H31N3O6	3	0.7615	-	652119	624738	580708	447745	513357	465861	1.20599
MW0054001	Hypaconitine	6900-87-4 6900-87-4	CHEBI:5831	No result	C08688	No result	No result	Benzene and substituted derivatives	Benzene and substituted derivatives	C33H45NO10	3	0.7984	6900-87-4	324956	300969	276968	149544	165595	158947	1.28124
MW0103605	Lamivudine	134678-17-4 136891-12-8 480434-79-5	CHEBI:63577	HMDB0014847	C07065 D00353	No result	No result	Nucleotide and Its metabolites	Nucleotide and Its metabolites	C8H11N3O3S	3	0.5665	134678-17-4	266095	262834	229993	112838	136846	81084.3	1.2169
MW0169826	Scopoletin	92-61-5	CHEBI:17488	HMDB0034344	C01752	ACon1_000143 BPBio1_001061 BSPBio_000963 BSPBio_002944 IDI1_000720 MEGxp0_001192 Prestwick2_000962 Prestwick3_000962 Spectrum5_000654	No result	Heterocyclic compounds	Heterocyclic compounds	C10H8O4	2	0.8009	92-61-5	217615	208612	192514	64665.7	60030.3	68253.5	1.29509
MW0015139	7-[(1R,2R,3S,5S)-2-[(4S)-4-(2,3-dihydro-1H-inden-2-yl)-4-hydroxybut-1-enyl]-3-fluoro-5-hydroxycyclopentyl]hept-5-enoic acid							Hormones and hormone related compounds	Hormones and hormone related compounds	C25H33FO4	3	0.6927	-	280820	331081	311894	200116	204450	95736.9	1.03482
MW0110295	Tyrosyl-tryptophan	60815-41-0	CHEBI:75006	No result	No result	No result	No result	Amino acid and Its metabolites	Small Peptide	C20H21N3O4	3	0.7635	60815-41-0	1.07909e+06	1.07607e+06	1.04269e+06	895479	929469	949851	1.24863
MW0114022	Buprenorphine Glucuronide	No result	No result	HMDB0060928	No result	No result	No result	Heterocyclic compounds	Heterocyclic compounds	C35H49NO10	3	0.8296	-	173109	200639	168807	33304.8	51422.1	35107.2	1.27577
MW0107917	L-Name	126265-24-5 50903-99-6	CHEBI:7549	No result	C04337	BSPBio_001221 Bio1_000442 Bio1_000931 Bio1_001420 Bio2_000441 Bio2_000921 HSCI1_000257 IDI1_002196 Lopac0_000848	No result	Aldehyde,Ketones,Esters	Esters	C7H15N5O4	3	0.7641	50903-99-6	491921	410487	369827	279890	293574	276194	1.19462
MW0137833	Cyanolide A	No result	No result	No result	No result	No result	No result	Heterocyclic compounds	Heterocyclic compounds	C42H72O16	3	0.8107	-	639836	699080	580795	710695	815894	815362	1.06303
MW0154671	9-O-acetylneuraminic acid	No result	No result	No result	C03525	No result	No result	Organic acid and Its derivatives	Organic acid and Its derivatives	C11H19NO9	3	0.7347	-	647766	654959	603903	501845	496852	486000	1.2708
MW0153665	Met-Ser-Phe-Thr-Phe	No result	No result	No result	No result	No result	No result	Amino acid and Its metabolites	Small Peptide	C30H41N5O8S	3	0.7672	-	171755	158585	145086	23886.8	16792.4	12966.3	1.28306
MW0151191	Hoiamide A	No result	No result	No result	No result	No result	No result	Alcohol and amines	Amines	C44H71N5O10S3	3	0.8664	-	280699	298762	243837	125533	133745	144500	1.27351
MW0139710	Silicristin	33889-69-9	CHEBI:9143	No result	C08717	No result	No result	Heterocyclic compounds	Heterocyclic compounds	C25H22O10	3	0.6928	33889-69-9	221158	201805	188903	61837.1	65917.5	64810.9	1.29516
MW0137302	Aklavin							Heterocyclic compounds	Heterocyclic compounds	C30H35NO10	3	0.7836	60504-57-6 | 66676-88-8	223665	213370	319389	298428	432998	442541	1.00868
MW0158306	Trp-Met							Amino acid and Its metabolites	Small Peptide	C16H21N3O3S	3	0.5487	21438-63-1	285340	264461	208257	357914	405365	412107	1.1764
MW0158227	Trp-Pro-Gly							Amino acid and Its metabolites	Small Peptide	C18H22N4O4	3	0.6624	-	267933	251350	230308	106478	113229	112901	1.29081
MEDP1547	Sodium 1-hydroxy-3-(phosphonooxy)propan-2-olate							Organic acid and Its derivatives	Phosphoric acids	C3H8NaO6P	3	0.6354	17603-42-8	272315	269242	255250	401090	415523	396232	1.29121
MW0125180	5-[3-[4-(6,8-Dihydroxy-1,3-dimethyl-1,2,3,4-tetrahydroisoquinolin-5-yl)-1-hydroxy-8-methoxy-6-methylnaphthalen-2-yl]-4-hydroxy-5-methoxy-7-methylnaphthalen-1-yl]-1,3-dimethyl-1,2,3,4-tetrahydroisoquinoline-6,8-diol							Heterocyclic compounds	Heterocyclic compounds	C46H48N2O8	3	0.6259	-	177254	135981	123476	9089.02	3516.87	8487.55	1.27331
MW0009421	Phenylethylmalonamide	7206-76-0 80147-40-6 80866-90-6	CHEBI:8097	No result	C07499	Oprea1_383473	No result	Benzene and substituted derivatives	Benzene and substituted derivatives	C11H14N2O2	3	0.6396	-	573168	570889	573508	705820	701552	724422	1.2945
MW0152260	Leu-Asp-Gln-Gln-Val	No result	No result	No result	No result	No result	No result	Amino acid and Its metabolites	Small Peptide	C25H43N7O10	3	0.7708	-	175747	244273	165269	53595.6	48842.2	69343.8	1.2575
MW0107771	Leu-Val-Lys	No result	No result	No result	No result	No result	No result	Amino acid and Its metabolites	Small Peptide	C17H34N4O4	3	0.779	-	972592	895644	781969	722892	757937	756153	1.02061
MW0108066	Lys-Met	No result	CHEBI:74566	No result	No result	No result	No result	Amino acid and Its metabolites	Small Peptide	C11H23N3O3S	3	0.6562	97729-52-7	249168	264870	261628	129839	128172	104558	1.27736
MW0157773	Thr-Phe-Val							Amino acid and Its metabolites	Small Peptide	C18H27N3O5	3	0.7676	-	209850	214984	178427	56814.8	67374.3	66312.4	1.28732
MW0155978	Pro-Pro-Ile	No result	No result	No result	No result	No result	No result	Amino acid and Its metabolites	Small Peptide	C16H27N3O4	3	0.8011	-	238916	240806	217489	107747	89734.2	87148.8	1.2835
MW0145204	(1S,3R,4S,9R,13S,14R)-3-[(2S,5S)-5-(2-bromo-5-hydroxyphenyl)-5-methoxypentan-2-yl]-13-hydroxy-9-[(1R)-1-hydroxyethyl]-4,14,16,16-tetramethyl-2,6,10,17-tetraoxatricyclo[11.3.1.11,5]octadecane-7,11-dione							Heterocyclic compounds	Heterocyclic compounds	C32H47BrO10	3	0.609	52659-57-1	147682	149482	133318	10059.1	9728.84	881.22	1.1798
MW0156654	Ser-Arg-Tyr-Glu	No result	No result	No result	No result	No result	No result	Amino acid and Its metabolites	Small Peptide	C23H35N7O9	3	0.8698	-	182813	184374	142992	25663.9	14616.9	60150	1.17733
MW0155136	Phe-Asp-Ser-Arg							Amino acid and Its metabolites	Small Peptide	C22H33N7O8	2	0.9167	-	194469	96114.4	209918	318435	286390	304456	1.03074
MW0150878	His-Asp-Trp							Amino acid and Its metabolites	Small Peptide	C21H24N6O6	3	0.6859	-	105814	50967.3	49588.3	174822	274666	164892	1.15165
MW0126947	Vidarabine	24356-66-9 5536-17-4	No result	HMDB0014340	D06298	BSPBio_002000 IDI1_000191 PDSP1_001036 PDSP2_001020 SMP1_000312 Spectrum5_001429	No result	Nucleotide and Its metabolites	Nucleotide and Its metabolites	C10H13N5O4	3	0.735	24356-66-9	493715	494297	493007	335225	350289	388519	1.25414
MW0107125	Glycocyamine	352-97-6 3727-20-6	CHEBI:16344 CHEBI:57742	HMDB0000128	C00581	No result	No result	Amino acid and Its metabolites	Amino acids	C3H7N3O2	3	0.8757	352-97-6	230779	254016	210714	82953.4	110495	95340.9	1.26776
MW0145690	Asn-Asn-Leu-Asn-Val	No result	No result	No result	No result	No result	No result	Amino acid and Its metabolites	Small Peptide	C23H40N8O9	3	0.8864	-	211471	192258	184692	49565.2	73211	59268.4	1.27337
MW0125163	Methylone							Aldehyde,Ketones,Esters	Ketones	C11H13NO3	3	0.7633	-	10067.6	16806.7	13281.1	144206	148411	153840	1.2904
MW0109304	Pro-Asn	No result	No result	No result	No result	No result	No result	Amino acid and Its metabolites	Small Peptide	C9H15N3O4	2	0.931	-	155826	234114	203898	65245.1	64911.4	57807.3	1.26914
MW0105257	Ketoleucine	816-66-0 86362-36-9	No result	HMDB0000695	C00233	No result	No result	Organic acid and Its derivatives	Organic acid and Its derivatives	C6H10O3	2	0.9761	816-66-0	275254	235536	218312	93829.3	124217	106407	1.25706
MW0156368	Rhipocephalin	71135-78-9	CHEBI:8827	No result	C09714	No result	No result	Terpenoids	Sesquiterpenoids	C21H28O6	3	0.5034	71135-78-9	144661	145136	122218	1719.68	1979.64	4082.76	1.28798
MW0108810	3-Nitrotyrosine	3604-79-3 621-44-3 32988-39-9 66950-33-2	No result	HMDB0001904	No result	No result	No result	Amino acid and Its metabolites	Amino acid derivatives	C9H10N2O5	3	0.8009	3604-79-3	193015	195132	176726	50805.4	53954.3	56882.5	1.29645
MW0158711	TyrMe-Ser-OH							Amino acid and Its metabolites	Small Peptide	C19H20N2O8	3	0.63	-	114628	143560	165909	217029	218017	391635	1.06579
MW0140465	10-Formyl-THF-L-glutamate	No result	No result	No result	No result	No result	No result	Others	Others	C25H30N8O10	3	0.5166	-	188290	125385	159426	18972.4	31462.1	20362	1.27249
MW0149786	Gln-Phe-Trp							Amino acid and Its metabolites	Small Peptide	C25H29N5O5	3	0.7544	-	272576	273282	321680	392565	445521	431711	1.22891
MW0151251	(1-Hydroxy-3,7,11-trimethyldodeca-2,6,10-trienyl)phosphonic acid	140633-12-1	No result	No result	No result	No result	No result	Others	Others	C15H27O4P	3	0.7335	148796-53-6 | 140633-12-1	120250	228941	159932	26371.6	65036.1	15915.1	1.14587
MW0053507	Germine	508-65-6 508-65-6	CHEBI:5338	No result	C10807	ACon1_001511	No result	Heterocyclic compounds	Heterocyclic compounds	C27H43NO8	3	0.5569	508-65-6	235434	225652	199271	72131.2	98754.7	87857.9	1.26838
MW0010655	Secoisolariciresinol diglucoside							Lignans and Coumarins	Lignans	C32H46O16	3	0.7186	158932-33-3 | 148244-82-0	160749	166093	169075	289852	308601	299067	1.29633
MEDP1225	Urobilinogen	14684-37-8	CHEBI:29026	HMDB0001898	C05790	No result	No result	Tryptamines,Cholines,Pigments	Pigments	C33H44N4O6	3	0.5896	14684-37-8	258379	157567	128700	41563.9	49943.9	51559.2	1.23247
MW0158456	Tyr-Glu-Gln-Asp	No result	No result	No result	No result	No result	No result	Amino acid and Its metabolites	Small Peptide	C23H31N5O11	3	0.8188	-	155927	176813	119550	28338	4849.48	17589	1.18801
MW0152826	Unii-T03uxi5O64	No result	No result	No result	No result	No result	No result	Benzene and substituted derivatives	Benzene and substituted derivatives	C36H48N2O10	3	0.5543	25867-19-0	111692	191598	198210	29114	10259.1	60876	1.11339
MW0122774	Allobarbital	52-43-7	No result	No result	D02817	No result	No result	Heterocyclic compounds	Heterocyclic compounds	C10H12N2O3	3	0.7717	-	321453	313704	268716	156540	172942	173960	1.26791
MW0156609	Senecivernine	72755-25-0	CHEBI:9109	No result	C10393	No result	No result	Aldehyde,Ketones,Esters	Ketones	C18H25NO5	3	0.6708	72755-25-0	255674	241168	185568	85864.6	99319.3	97105	1.26167
MW0144386	Adouetine Y	19542-38-2	CHEBI:2493	No result	C09994	No result	No result	Amino acid and Its metabolites	Amino acid derivatives	C34H40N4O4	3	0.7835	19542-38-2	192513	171878	147790	60414.1	23967.4	27819.2	1.22072
MW0103079	Valtrate	18296-44-1	CHEBI:9928	No result	C09801	ACon0_000478 MEGxp0_000900	No result	Organic acid and Its derivatives	Organic acid and Its derivatives	C22H30O8	3	0.6598	18296-44-1	206361	120530	170476	12710.4	56912.9	28202.5	1.15214
MW0154313	NBD-FTY720 phenoxy	No result	No result	No result	No result	No result	No result	Benzene and substituted derivatives	Benzene and substituted derivatives	C23H31N5O6	3	0.7854	-	157287	156262	144016	21044	27765.6	9288.99	1.24326
MW0154732	Einecs 234-275-5	11050-94-5 4955-81-1 11050-94-5	CHEBI:7751	No result	C11312	No result	No result	Heterocyclic compounds	Heterocyclic compounds	C45H72O12	3	0.6404	11050-94-5	196473	197023	128473	35297.3	43493.7	44718.9	1.26812
MW0004631	p-Aminobenzoic acid	150-13-0 150-13-0 2906-28-7 29896-45-5	CHEBI:30753 CHEBI:17836	HMDB0001392	C00568 D02456	BSPBio_001828 IDI1_000783 Oprea1_221096 Spectrum5_000778	No result	Organic acid and Its derivatives	Organic acid and Its derivatives	C7H7NO2	3	0.7429	150-13-0	327023	302124	294258	169142	182751	173246	1.28743
MW0053734	Glycerophospho-N-Palmitoyl Ethanolamine	100575-09-5	No result	No result	No result	No result	No result	GP	PE	C21H44NO7P	3	0.6775	100575-09-5	231543	186634	120770	42450.9	36863.8	62016.9	1.21925
MW0148663	Dolasetron	No result	No result	No result	No result	No result	No result	Heterocyclic compounds	Heterocyclic compounds	C19H20N2O3	3	0.5593	115956-12-2 | 115956-13-3	423894	391630	373772	260291	267436	264308	1.2783
MW0146152	Asp-Ile-Lys-Glu-Met							Amino acid and Its metabolites	Small Peptide	C26H46N6O10S	3	0.7559	-	191992	189218	153470	281327	314496	336023	1.23874
MW0158974	Val-Gln-Phe-Asp	No result	No result	No result	No result	No result	No result	Amino acid and Its metabolites	Small Peptide	C23H33N5O8	2	0.9012	-	116113	141776	315480	80509.3	44769.5	51285.7	1.09784
MW0157677	Thr-Ile-Asp-Phe-Glu	No result	No result	No result	No result	No result	No result	Amino acid and Its metabolites	Small Peptide	C28H41N5O11	3	0.655	-	155194	154278	139246	10300.9	34776.6	8057.88	1.21171
MW0158922	Val-Asn-Phe-Asp							Amino acid and Its metabolites	Small Peptide	C22H31N5O8	3	0.8576	-	181924	149283	145424	284342	293515	294354	1.26532
MW0012070	11-a-O-b-D-Glucopyranosyl-16a-O-methylneoquassin	No result	No result	HMDB0039773	No result	No result	No result	Aldehyde,Ketones,Esters	Ketones	C29H44O11	3	0.6251	-	546606	526906	490817	648212	660324	651219	1.25038
MW0124558	JWH 018 N-pentanoic acid metabolite-d4	No result	No result	No result	No result	No result	No result	Organic acid and Its derivatives	Organic acid and Its derivatives	C24H21NO3	3	0.8428	-	386724	400862	369623	251734	258677	252072	1.29059
MW0152522	Leu-Thr-Trp							Amino acid and Its metabolites	Small Peptide	C21H30N4O5	3	0.7557	-	305658	270765	248894	137180	138672	155779	1.26881
MW0152493	Leu-Ser-Leu-Glu-Glu	No result	No result	No result	No result	No result	No result	Amino acid and Its metabolites	Small Peptide	C25H43N5O11	3	0.649	-	194759	190241	198945	65000.8	73651	52853.4	1.28061
MW0151683	Ile-Phe							Amino acid and Its metabolites	Small Peptide	C15H22N2O3	3	0.8351	-	99219.9	87937.7	79444.2	214185	208657	235781	1.28264
MW0169476	Metoclopramide	364-62-5 7232-21-5	CHEBI:107736	HMDB0015363	C07868 D00726	BPBio1_000217 BPBio1_001100 BSPBio_000197 BSPBio_002027 Biomol-NT_000082 IDI1_000069 Lopac0_000762 Prestwick2_000209 Prestwick3_000209 Spectrum5_001449	No result	Benzene and substituted derivatives	Phenolics	C14H22ClN3O2	3	0.7322	364-62-5	291147	248964	253608	128743	139684	133556	1.28321
MW0123289	Cerulenin	17397-89-6	CHEBI:171741	No result	C12058	BSPBio_001276 IDI1_002233	No result	Heterocyclic compounds	Heterocyclic compounds	C12H17NO3	3	0.612	17397-89-6	332514	336633	289576	171929	204013	191724	1.25586
MW0108094	Lysylglutamic acid	45234-02-4	CHEBI:74557	No result	No result	No result	No result	Amino acid and Its metabolites	Small Peptide	C11H21N3O5	3	0.8506	45234-02-4	532822	495044	418421	356144	306615	393200	1.09325
MW0168997	Cysteinylglycine							Amino acid and Its metabolites	Small Peptide	C5H10N2O3S	3	0.5569	19246-18-5	54510.5	66413	55286.4	177950	194961	192608	1.29104
MW0124746	Malyngamide T	No result	No result	No result	No result	No result	No result	Alcohol and amines	Amines	C25H38ClNO5	3	0.5949	-	302371	100878	73016.1	20083.7	42581.4	25629.3	1.10053
MW0123532	Delavirdine	136817-59-9 147221-93-0	CHEBI:119573	HMDB0014843	C06941 D07782	No result	No result	Heterocyclic compounds	Heterocyclic compounds	C22H28N6O3S	3	0.7135	136817-59-9	146459	145038	128242	12814.9	4426.01	14910	1.25094
MEDL00363	Ile-Met	No result	CHEBI:74073	HMDB0028913	No result	No result	No result	Amino acid and Its metabolites	Small Peptide	C11H22N2O3S	3	0.8851	42384-14-5	243976	245176	224261	110947	112913	102402	1.29276
MW0156737	Ser-Glu-Lys-Arg	No result	No result	No result	No result	No result	No result	Amino acid and Its metabolites	Small Peptide	C20H38N8O8	3	0.7228	-	143884	139173	122731	10344.9	4022.2	5666.03	1.27996
MW0153996	(1R,2S,3R,6E,8S,9S,10S,12R,14E,16R)-9-[(2S,3R,4S,6R)-4-(dimethylamino)-3-hydroxy-6-methyloxan-2-yl]oxy-3-ethyl-2-hydroxy-2-[[(2R,3R,4R,5R,6R)-5-hydroxy-3,4-dimethoxy-6-methyloxan-2-yl]oxymethyl]-8,10,12-trimethyl-4,17-dioxabicyclo[14.1.0]heptadeca-6,14-diene-5,13-dione							Heterocyclic compounds	Heterocyclic compounds	C37H61NO13	3	0.598	73684-69-2	171330	156997	172658	28782.6	46913.3	41185.6	1.27311
MW0157735	Thr-Lys-Ser-Lys	No result	No result	No result	No result	No result	No result	Amino acid and Its metabolites	Small Peptide	C19H38N6O7	3	0.7094	-	195176	206179	186994	64196.6	67086.7	73416.9	1.29434
MW0141455	[4-[(4-acetamidobenzoyl)amino]phenyl] (Z)-7-[(1R,2R,3R)-3-hydroxy-2-[(E,3R)-3-hydroxy-4,4-dimethyloct-1-enyl]-5-oxocyclopentyl]hept-5-enoate							Hormones and hormone related compounds	Hormones and hormone related compounds	C37H48N2O7	3	0.5841	62873-55-6	175991	138281	117523	17626.6	25068.8	5870.41	1.2122
MW0107556	Isofumonisin B1							Amino acid and Its metabolites	Amino acid derivatives	C34H59NO15	3	0.6209	203259-29-4	141353	152896	179622	263449	271148	322413	1.2393
MW0141376	(3R,4S,5S,7R,8R,9E,11S,15R,17R)-3,8-Dihydroxy-17-[(S)-hydroxy-[(3R)-2-methyl-3-[(Z,2S)-pent-3-en-2-yl]oxiran-2-yl]methyl]-4-methoxy-5,7,9,11,15-pentamethyl-1-oxacyclooctadec-9-ene-2,6,12,16-tetrone							Heterocyclic compounds	Heterocyclic compounds	C32H50O10	3	0.6696	134455-11-1	227247	205047	190372	88352.9	84825.2	66499.5	1.27179
MW0159140	Val-Pro-Glu-Pro-Lys	No result	No result	No result	No result	No result	No result	Amino acid and Its metabolites	Small Peptide	C26H44N6O8	3	0.7376	-	345982	363520	313403	152198	258551	229253	1.0742
MW0144687	Ala-Phe-Gln-Lys	No result	No result	No result	No result	No result	No result	Amino acid and Its metabolites	Small Peptide	C23H36N6O6	3	0.7869	-	176957	163122	150616	34986.4	36459.4	36385.6	1.29732
MW0000247	Ergocristine	511-08-0	CHEBI:4821	No result	C09164	Lopac0_000514	No result	Heterocyclic compounds	Heterocyclic compounds	C35H39N5O5	3	0.5909	511-08-0	652396	631261	574952	725083	756645	759740	1.19353
MW0054722	Melengestrol acetate	2919-66-6 34712-64-6 5633-18-1	CHEBI:34831	No result	C14642 D04900	No result	No result	Hormones and hormone related compounds	Hormones and hormone related compounds	C25H32O4	3	0.5224	2919-66-6	621077	613570	527201	447515	475689	457067	1.18071
MW0157872	Thr-Val-Thr-Phe-Tyr							Amino acid and Its metabolites	Small Peptide	C31H43N5O9	2	0.9049	-	198008	217687	179494	335873	350721	289971	1.23655
MW0156708	Ser-Gln-Gly							Amino acid and Its metabolites	Small Peptide	C10H18N4O6	3	0.7486	-	59218.6	49032	56912.9	154134	232331	160025	1.26434
MW0141412	15(R)-17-Phenyl trinor prostaglandin F2alpha	41639-71-8	No result	No result	No result	No result	No result	Hormones and hormone related compounds	Hormones and hormone related compounds	C23H32O5	3	0.7623	41639-71-8	579354	598603	526903	437170	445773	440960	1.24271
MW0106904	Glu-His	No result	No result	HMDB0028821	No result	No result	No result	Amino acid and Its metabolites	Small Peptide	C11H16N4O5	3	0.8072	21435-29-0	237514	277490	274170	147193	130054	131461	1.27654
MW0123815	2-[(6,7-dimethoxyisoquinolin-1-yl)methyl]-3-ethyl-9,10-dimethoxy-2,3,4,6,7,11b-hexahydro-1H-benzo[a]quinolizine							Heterocyclic compounds	Heterocyclic compounds	C29H36N2O4	3	0.868	-	491170	467991	484959	583561	609015	631345	1.26721
MEDL00359	Gly-Pro-Leu	No result	No result	No result	No result	No result	No result	Amino acid and Its metabolites	Small Peptide	C13H23N3O4	2	0.8329	47066-32-0	560154	525226	490096	384145	398764	413823	1.23721
MW0153102	Lys-Phe-Lys-Met-Lys	No result	No result	No result	No result	No result	No result	Amino acid and Its metabolites	Small Peptide	C32H56N8O6S	3	0.6299	-	162993	168961	142731	28754	23722.9	43729.2	1.26686
MW0106709	Fmoc-L-leucine	35661-60-0	No result	No result	No result	No result	No result	Amino acid and Its metabolites	Amino acid derivatives	C21H23NO4	3	0.6154	35661-60-0	176493	156004	190103	49573.7	54005.2	40930.2	1.28438
MW0012144	11-Ketoandrosterone	1231-82-9 125670-69-1	CHEBI:34134	No result	C14671	No result	No result	Aldehyde,Ketones,Esters	Ketones	C19H28O3	3	0.7063	1231-82-9	258956	234736	224135	120819	139851	80803.9	1.18913
MW0010237	7-Deshydroxypyrogallin-4-carboxylic acid							Organic acid and Its derivatives	Organic acid and Its derivatives	C12H8O6	3	0.8346	-	19061.9	21739.5	19832	128437	178867	129632	1.29147
MW0110121	Trp-Leu	13123-35-8	CHEBI:74871	No result	No result	No result	No result	Amino acid and Its metabolites	Small Peptide	C17H23N3O3	3	0.7561	-	212984	206461	170497	49380.4	73017.3	94350.8	1.21024
MW0109884	Thr-Lys-Pro-Arg							Amino acid and Its metabolites	Small Peptide	C21H40N8O6	3	0.7931	-	260739	250784	237592	367492	361679	392612	1.27862
MW0149921	Glu-Arg-Phe-Asp	No result	No result	No result	No result	No result	No result	Amino acid and Its metabolites	Small Peptide	C24H35N7O9	3	0.8091	-	452310	434145	407205	510031	610259	546025	1.17244
MW0150995	His-Leu-Lys-Tyr-Val	No result	No result	No result	No result	No result	No result	Amino acid and Its metabolites	Small Peptide	C32H50N8O7	3	0.6286	-	156539	133371	112591	13735.1	13157.4	3911.38	1.24123
MW0165270	(2S)-2-ammonio-3-(4-hydroxy-3-methylphenyl)propanoate	No result	No result	No result	No result	No result	No result	Others	Others	C10H13NO3	3	0.651	-	512590	461537	402617	541702	601450	603937	1.09087
MW0145812	Asn-Leu-Lys-Asp	No result	No result	No result	No result	No result	No result	Amino acid and Its metabolites	Small Peptide	C20H36N6O8	2	0.9321	-	241553	244236	199950	133814	93266.1	88638.5	1.22186
MW0107948	Pyroglutamic acid	149-87-1 35255-51-7 6333-12-6 98-79-3	CHEBI:18183	HMDB0000267	C01879	No result	No result	Amino acid and Its metabolites	Amino acid derivatives	C5H7NO3	2	0.977	98-79-3	416834	408445	449497	322741	284237	298107	1.25431
MW0107145	Glycyl-L-phenylalanine							Amino acid and Its metabolites	Small Peptide	C11H14N2O3	3	0.7667	-	268079	272491	256555	383255	392071	391185	1.29332
MW0159186	Val-Thr-Pro-Gly-Gly					No result	No result	Amino acid and Its metabolites	Small Peptide	C18H31N5O7	3	0.7287	-	350910	260780	248880	364767	435546	427850	1.08223
MW0006689	Cyproconazole	113096-99-4 94361-06-5 99935-66-7	CHEBI:83748	No result	C18456	No result	No result	Benzene and substituted derivatives	Benzene and substituted derivatives	C15H18ClN3O	3	0.642	-	223264	213523	185841	84603.6	79075.2	92239.8	1.28399
MW0152991	Lys-His-Ile-Leu-Ala	No result	No result	No result	No result	No result	No result	Amino acid and Its metabolites	Small Peptide	C27H48N8O6	3	0.685	-	207485	169222	173310	57547.8	64781.1	62525.9	1.28813
MW0148485	Isorescinnamine, dihydro-	No result	No result			No result	No result	Alkaloids	Alkaloids	C35H44N2O9	3	0.8283	6335-49-5	263672	268217	312222	354495	514623	339933	1.00427
MW0003089	2-Hydroxy-2-phenylpropanoic acid							Organic acid and Its derivatives	Organic acid and Its derivatives	C9H10O3	3	0.7755	515-30-0 | 4607-38-9	336112	311916	290278	185204	194818	194510	1.27802
MW0148302	Dermorphin	77614-16-5	No result	No result	C20030	No result	No result	Amino acid and Its metabolites	Small Peptide	C40H50N8O10	3	0.7346	77614-16-5	181195	183956	167086	50712.2	60380.6	59095.4	1.29182
MW0160082	Butyrate	107-92-6 461-55-2 4940-45-8 107-92-6 1977-33-9	CHEBI:17968 CHEBI:30772	HMDB0000039	C00246	Bio1_000444 Bio1_000933 Bio1_001422	No result	Organic acid and Its derivatives	Organic acid and Its derivatives	C4H7O2-	2	0.9726	461-55-2	144379	133491	120949	12946.3	12015.9	12824.8	1.29863
MEDN0506	N-Acetylglucosamine 1-Phosphate							Carbohydrates and Its metabolites	Phosphate sugars	C8H16NO9P	1b	0.656	6866-69-9	58346.7	4408.01	32186.4	139064	148922	166453	1.0257
MW0119773	3-[3-[(4-Fluorophenyl)sulfonylamino]-1,2,3,4-tetrahydrocarbazol-9-yl]propanoic acid							Organic acid and Its derivatives	Organic acid and Its derivatives	C21H21FN2O4S	3	0.6915	-	164473	124319	120565	17603.4	16083.8	17876	1.29363
MW0110311	Tyr-Trp							Amino acid and Its metabolites	Small Peptide	C20H21N3O4	3	0.6884	-	174260	192569	156175	275708	307495	295757	1.25781
MW0148235	Delphinine							Benzene and substituted derivatives	Benzene and substituted derivatives	C33H45NO9	3	0.6851	561-07-9	179695	170276	122840	45803.8	41158.5	29904.1	1.26196
MW0150931	His-Glu-Tyr-Lys	No result	No result	No result	No result	No result	No result	Amino acid and Its metabolites	Small Peptide	C26H37N7O8	3	0.7415	-	200013	173730	104936	44809	26558	52534.4	1.20007
MW0152242	Leu-Asn-Arg-Glu	No result	No result	No result	No result	No result	No result	Amino acid and Its metabolites	Small Peptide	C21H38N8O8	3	0.8024	-	561927	561827	512635	432792	406914	442235	1.23773
MEDN0832	D-Glucosamine 6-Phosphate						No result	Carbohydrates and Its metabolites	Phosphate sugars	C6H14NO8P	3	0.654	-	245492	261411	301686	383399	406244	372673	1.22361
MW0005833	O-Desmethyl Mycophenolic Acid	31858-65-8	No result	No result	No result	No result	No result	Benzene and substituted derivatives	Benzene and substituted derivatives	C16H18O6	3	0.6182	31858-65-8	285810	275226	248523	134537	163909	158875	1.25767
MW0148895	Endomorphin-1	189388-22-5	No result	HMDB0005773	No result	No result	No result	Heterocyclic compounds	Heterocyclic compounds	C34H38N6O5	2	0.9235	189388-22-5	980884	952153	931023	1.0487e+06	1.08244e+06	1.08484e+06	1.23793
MW0147346	Benzyl cetraxate	No result	No result	No result	No result	No result	No result	Benzene and substituted derivatives	Phenolics	C24H29NO4	3	0.7311	83544-74-5	155276	141648	129636	23672.7	25149.2	26090.6	1.29691
MW0146037	Asp-Asn-Gly							Amino acid and Its metabolites	Small Peptide	C10H16N4O7	3	0.6737	-	267137	253782	233873	117192	146087	140492	1.26067
MW0151013	His-Lys-Ile-Asp	No result	No result	No result	No result	No result	No result	Amino acid and Its metabolites	Small Peptide	C22H37N7O7	3	0.7891	-	129082	126938	109971	6518.05	5986.88	2488.88	1.27735
MW0158583	Tyr-Pro-Asn	No result	No result	No result	No result	No result	No result	Amino acid and Its metabolites	Small Peptide	C18H24N4O6	3	0.7379	-	252566	267619	249381	322318	415410	382226	1.20034
MW0105831	Asn-Pro	No result	CHEBI:73425	No result	No result	No result	No result	Amino acid and Its metabolites	Small Peptide	C9H15N3O4	3	0.5398	78346-95-9	191009	219105	207633	84569.5	98353.2	84705.8	1.28447
MW0158660	Tyr-Val-Arg-Pro-Leu	No result	No result	No result	No result	No result	No result	Amino acid and Its metabolites	Small Peptide	C31H50N8O7	3	0.6888	-	155716	147369	126991	22489	36964.2	21023	1.26887
MW0152303	Leu-Gln-Tyr-Asp	No result	No result	No result	No result	No result	No result	Amino acid and Its metabolites	Small Peptide	C24H35N5O9	3	0.8817	-	954238	967545	882727	1.01532e+06	1.05856e+06	1.07948e+06	1.12785
MW0116535	1,1'-Bis(2-hydroxy-3-methylcarbazole)	No result	No result	HMDB0040776	No result	No result	No result	Heterocyclic compounds	Indole and Its derivatives	C26H20N2O2	3	0.5627	155519-83-8	166238	168216	138531	35345.1	45766.7	43352.3	1.28501
MW0105788	Asn-Phe	22849-01-0	No result	HMDB0028738	No result	No result	No result	Amino acid and Its metabolites	Small Peptide	C13H17N3O4	2	0.8274	-	591159	556218	548519	658139	686902	699341	1.2413
MW0109828	Tfa-VAL-TYR-VAL-OH	No result	No result	No result	No result	BSPBio_003535	No result	Amino acid and Its metabolites	Amino acid derivatives	C21H28F3N3O6	3	0.8887	64577-63-5	237232	272868	242184	127147	104337	173046	1.17253
MW0141464	16alpha,17-Dihydroxypregn-4-ene-3,20-dione cyclic acetal with 2-furyl methyl ketone	7148-96-1	CHEBI:79407	No result	C14880	No result	No result	Aldehyde,Ketones,Esters	Ketones	C27H34O5	3	0.873	7148-96-1	341713	313936	300214	191858	215259	201621	1.26806
MW0109935	Threoninyl-Isoleucine	No result	No result	HMDB0029064	No result	No result	No result	Amino acid and Its metabolites	Small Peptide	C10H20N2O4	3	0.6308	-	237526	310745	196414	125052	142461	130233	1.18367
MW0126804	3',5'-Cyclic dtmp							Organic acid and Its derivatives	Organic acid and Its derivatives	C10H13N2O7P	3	0.6656	6453-60-7	9538.96	16645.1	26583.1	138156	78801	182418	1.21673
MW0150739	3-[18-(2-carboxyethyl)-7-ethenyl-17-formyl-12-[(4E,8E)-1-hydroxy-5,9,13-trimethyltetradeca-4,8,12-trienyl]-3,8,13-trimethylporphyrin-21,23-diid-2-yl]propanoic acid;iron(2+)							Organic acid and Its derivatives	Organic acid and Its derivatives	C49H56FeN4O6	3	0.6501	-	143441	166639	107071	28888.3	17571.7	24372.3	1.2706
MW0148316	Descinolone acetonide	2135-14-0	CHEBI:34672	No result	C14653 D03691	No result	No result	Aldehyde,Ketones,Esters	Ketones	C24H31FO5	3	0.7541	2135-14-0	249016	252655	220037	107489	132207	135888	1.25667
MW0102906	cis,cis-Muconic acid	1119-72-8 505-70-4 1119-72-8	CHEBI:16508 CHEBI:32379	HMDB0006331	No result	No result	No result	FA	FFA	C6H6O4	3	0.6571	1119-72-8	301106	275110	245311	149662	158630	167125	1.26191
MW0114042	Casimiroedine	1443837	CHEBI:3451	HMDB0030274	C10577	No result	No result	Heterocyclic compounds	Heterocyclic compounds	C21H27N3O6	3	0.637	1443837	113616	240296	23367.3	10053.7	12332.6	9882.51	1.08428
MW0126264	e-64	66701-25-5 68140-58-9 66701-25-5	CHEBI:30270	No result	C01341	Lopac0_000480	No result	Heterocyclic compounds	Heterocyclic compounds	C15H27N5O5	3	0.8673	66701-25-5 | 80408-29-3	621697	578023	569572	461141	490529	475540	1.24391
MW0145263	Arg-Arg-Lys-Ser-His	No result	No result	No result	No result	No result	No result	Amino acid and Its metabolites	Small Peptide	C27H50N14O7	3	0.6084	-	112767	134227	100860	6592.34	2716.92	1518	1.26538
MW0106355	D-alanyl-D-alanine	923-16-0	CHEBI:16576 CHEBI:57822	HMDB0003459 HMDB0028680	No result	No result	No result	Amino acid and Its metabolites	Small Peptide	C6H12N2O3	3	0.6688	923-16-0	246597	218070	159292	84726.4	95958.3	106398	1.2145
MW0144594	Ala-His-Leu-Asp	No result	No result	No result	No result	No result	No result	Amino acid and Its metabolites	Small Peptide	C19H30N6O7	3	0.6893	-	136519	131501	127825	12575.1	22457.8	24077.7	1.27044
MW0108641	N-Acetylleucine	1188-21-2 24160-46-1 99-15-0	CHEBI:17786	HMDB0011756	C02710	BPBio1_000784 BSPBio_000712 BSPBio_003039 IDI1_000622 Prestwick2_000896 Prestwick3_000896 Spectrum5_001242	No result	Amino acid and Its metabolites	Amino acid derivatives	C8H15NO3	2	0.964	1188-21-2	264482	314669	236088	174320	154796	149740	1.22332
MW0152179	Lemobiline	26126-76-1	CHEBI:6406	No result	C10705	No result	No result	Heterocyclic compounds	Heterocyclic compounds	C15H17NO2	3	0.6146	26126-76-1	341079	313603	316664	209751	199873	225494	1.27337
MW0148876	Elatin	26000-16-8	CHEBI:4768	No result	C08681	No result	No result	Benzene and substituted derivatives	Benzene and substituted derivatives	C38H50N2O10	3	0.6541	26000-16-8	189400	113954	102765	15938.6	31537	22636	1.24068
MW0159472	Zwittermicin A	155547-95-8 155547-95-8	CHEBI:80056	No result	C15726	No result	No result	Amino acid and Its metabolites	Small Peptide	C13H28N6O8	3	0.5777	-	180046	171147	165860	67435.8	56536.9	58809	1.29244
MW0114723	Leucomycin A1	16846-34-7	CHEBI:34812	No result	C14056	No result	No result	Aldehyde,Ketones,Esters	Esters	C40H67NO14	3	0.5764	16846-34-7	117698	171335	93363	11411.9	17704.2	19137.7	1.26578
MW0106123	H-Tyr-Pro-Phe-Val-Glu-Pro-Ile-OH	No result	No result	No result	No result	No result	No result	Amino acid and Its metabolites	polypeptide	C44H61N7O11	3	0.588	-	311881	280912	294150	387964	412339	420678	1.26376
MW0151444	Ile-His-Ala-Glu	No result	No result	No result	No result	No result	No result	Amino acid and Its metabolites	Small Peptide	C20H32N6O7	3	0.8131	-	227730	197632	173811	79036.6	95864	90350.3	1.26422
MW0007898	N-(2-(3-(piperazin-1-ylmethyl)imidazo[2,1-b]thiazol-6-yl)phenyl)quinoxaline-2-carboxamide							Benzene and substituted derivatives	Benzene and substituted derivatives	C25H23N7OS	3	0.7512	-	159435	160562	168079	44084.9	58530.8	51954.5	1.28572
MW0155902	Pro-Ile-Thr	No result	No result	No result	No result	No result	No result	Amino acid and Its metabolites	Small Peptide	C15H27N3O5	3	0.8783	-	136052	158381	150337	19872.4	47159.9	45255.9	1.20743
MW0107334	L-Histidine	150-35-6 26062-48-6 6027-02-7 6459-59-2 7006-35-1 71-00-1	CHEBI:15971 CHEBI:57595	HMDB0000177	C00135 D00032	Lopac0_000566	No result	Amino acid and Its metabolites	Amino acids	C6H9N3O2	2	0.9657	71-00-1	527077	532405	524218	440940	396923	413826	1.25891
MW0158888	Val-Arg-Ala-Glu	No result	No result	No result	No result	No result	No result	Amino acid and Its metabolites	Small Peptide	C19H35N7O7	3	0.7917	-	137996	136292	117303	25847.4	30199.5	4592.24	1.13178
MW0108213	Methionine	24425-78-3 2899-37-8 3654-96-4 58576-49-1 59-51-8 63-68-3 86366-53-2 1105707-18-3 26062-47-5 33807-07-7 348-67-4 7005-18-7 7425-86-7 6436-04-0 87206-44-8	CHEBI:16643 CHEBI:57844 CHEBI:16811 CHEBI:64558 CHEBI:16867 CHEBI:57932	HMDB0000696 HMDB0033951	C00073 D00019 C01733 D04983 C00855	No result	No result	Amino acid and Its metabolites	Amino acids	C5H11NO2S	2	0.9573	63-68-3	258723	288880	262438	146529	149846	183040	1.24538
MW0103930	(4-ethyl-2,6-dihydroxyphenyl)oxidanesulfonic acid							Organic acid and Its derivatives	Organic acid and Its derivatives	C8H10O6S	3	0.8119	-	34900.6	33033.1	41811.2	137164	198439	104392	1.24807
MW0153162	Lys-Thr-Thr-Ser-Gly	No result	No result	No result	No result	No result	No result	Amino acid and Its metabolites	Small Peptide	C19H36N6O9	3	0.7551	-	154445	141461	118801	24636.2	30185.4	29805.7	1.28925
MW0124398	Indacaterol	312753-06-3 753498-25-8	CHEBI:68575	HMDB0015608	D09318	No result	No result	Heterocyclic compounds	Heterocyclic compounds	C24H28N2O3	3	0.7029	312753-06-3	480054	494758	479169	344420	392339	387877	1.23215
MW0014807	5-Methoxytryptamine	608-07-1 66-83-1 68160-56-5	CHEBI:2089	HMDB0004095	C05659	BPBio1_000530 Biomol-NT_000156 CBMicro_004933 Lopac0_000789 Oprea1_086738 Spectrum5_001300	No result	Tryptamines,Cholines,Pigments	Tryptamines	C11H14N2O	3	0.6271	608-07-1	358247	370577	320185	426306	476432	474883	1.19944
MW0157361	Taxine B	1361-51-9 13765-25-8	No result	No result	C19989	No result	No result	Terpenoids	Ditepenoids	C33H45NO8	3	0.6187	-	168587	145595	66434.9	23324.1	16638.5	12219.3	1.22676
MW0107267	His-Met-Arg							Amino acid and Its metabolites	Small Peptide	C17H30N8O4S1	3	0.7127	-	250583	149921	137942	248012	327298	290566	1.01316
MW0103998	2,3,4,5-Tetrahydropyridine-2-carboxylic acid	3038-89-9 35381-44-3 73980-78-6	CHEBI:16987 CHEBI:49015	HMDB0012130 HMDB0062589	No result	No result	No result	Organic acid and Its derivatives	Organic acid and Its derivatives	C6H9NO2	3	0.8565	3038-89-9	312732	316916	332918	231883	203156	201657	1.26577
MW0007933	DL-2-(2,4-Dinitroanilino)-4-(methylsulphinyl)butyric acid	No result	No result	No result	No result	No result	No result	Benzene and substituted derivatives	Benzene and substituted derivatives	C11H13N3O7S	3	0.568	1695-02-9	642801	663306	572903	691224	738678	774351	1.0705
MW0157845	Thr-Tyr-Leu-Glu	No result	No result	No result	No result	No result	No result	Amino acid and Its metabolites	Small Peptide	C24H36N4O9	3	0.8188	-	645218	610082	585952	508320	510927	497746	1.24526
MW0103490	CDP-ethanolamine	3036-18-8 31468-86-7	CHEBI:16732	HMDB0001564	C00570	No result	No result	Nucleotide and Its metabolites	Nucleotide and Its metabolites	C11H20N4O11P2	3	0.5929	3036-18-8	131437	136849	136607	28053.4	29147.4	24831.8	1.29738
MW0148095	Cysteinyl-Arginine	No result	No result	HMDB0028769	No result	No result	No result	Amino acid and Its metabolites	Small Peptide	C9H19N5O3S	3	0.639	-	362477	315116	264703	190416	216644	213032	1.17022
MW0155126	Phe-Asp-Glu-Phe-Leu	No result	No result	No result	No result	No result	No result	Amino acid and Its metabolites	Small Peptide	C33H43N5O10	3	0.8727	-	169830	114683	100570	27436.5	28011.1	7781.41	1.17803
MEDP0585	FFA(18:4)	No result	No result	No result	No result	No result	No result	FA	Oxidized lipids	C18H28O2	3	0.7389	2012-14-8	207918	208119	158901	76704	90441	86982.2	1.25997
MW0145743	Asn-Glu-Phe-Lys	No result	No result	No result	No result	No result	No result	Amino acid and Its metabolites	Small Peptide	C24H36N6O8	3	0.7529	-	491327	456391	494376	582646	592095	588056	1.2587
MW0152498	Leu-Ser-Phe-Met-Gln	No result	No result	No result	No result	No result	No result	Amino acid and Its metabolites	Small Peptide	C28H44N6O8S	3	0.7702	-	224806	128136	169649	68214.8	75172.8	58558	1.21429
MW0158358	Tyr-Ala-Leu-Asp	No result	No result	No result	No result	No result	No result	Amino acid and Its metabolites	Small Peptide	C22H32N4O8	3	0.7293	-	146596	127549	102636	27003.4	20653.8	9516.52	1.23331
MW0006354	Bifemelane	90293-01-9 96480-49-8	No result	No result	D07528	No result	No result	Benzene and substituted derivatives	Benzene and substituted derivatives	C18H23NO	3	0.8179	90293-01-9	130512	101078	119797	17201.9	2287.33	13264.2	1.17483
MW0010659	Silibinin	22888-70-6	CHEBI:9144	No result	D08515	BSPBio_002623 MEGxp0_001301 SMP2_000323 Spectrum5_001893	SR-01000799140-2	Others	Others	C25H22O10	3	0.6142	22888-70-6 | 36804-17-8 | 65666-07-1 | 802918-57-6	179736	185019	155765	65820.2	71973.2	64947.6	1.28868
MW0110107	L-Tryptophan-L-glutamine	No result	No result	No result	No result	No result	No result	Amino acid and Its metabolites	Small Peptide	C16H20N4O4	3	0.8934	-	382184	406525	438019	525629	507102	509846	1.22499
MW0107478	L-isoleucyl-L-asparagine							Amino acid and Its metabolites	Small Peptide	C10H19N3O4	3	0.7127	-	219681	134694	117042	53030.4	47842.7	54788.5	1.22225
MW0152415	Leu-Lys-Glu							Amino acid and Its metabolites	Small Peptide	C17H32N4O6	3	0.816	-	229640	215872	210269	147122	72913.4	120086	1.11563
MW0000170	N-Methylactinodaphnine	487-36-5 5890-28-8	CHEBI:17	HMDB0033354	C09389	No result	No result	Alkaloids	Alkaloids	C19H19NO4	3	0.6944	5890-28-8	113532	83913.3	216253	32564.5	33200.7	32587	1.20147
MW0152291	Leu-Gln-His							Amino acid and Its metabolites	Small Peptide	C17H28N6O5	3	0.7573	-	298120	140784	192690	82616.8	126069	108290	1.03287
MW0115925	(4-Ethylnaphthalen-1-yl)[1-(5-fluoropentyl)-1H-indol-3-yl]methanone							Aldehyde,Ketones,Esters	Ketones	C26H26FNO	3	0.7602	-	121671	120955	99566	4169.83	22877.6	634.99	1.10586
MEDN1239	5-O-(1-carboxyvinyl) -3-phosphate							Organic acid and Its derivatives	Phosphoric acids	C10H13O10P	3	0.7527	89771-75-5	5248.91	9369.65	16720.5	118090	110852	115761	1.25626
MW0153299	Maculosine							Heterocyclic compounds	Heterocyclic compounds	C17H17NO6	3	0.5886	-	183397	188705	180281	252498	340280	272757	1.20451
MW0155953	Pro-Phe-Ala-Thr-Glu	No result	No result	No result	No result	No result	No result	Amino acid and Its metabolites	Small Peptide	C26H37N5O9	3	0.5609	-	217595	103328	100529	44903.9	15505.1	48366.9	1.0988
MW0152403	Leu-Leu-Met	No result		No result	No result	No result	No result	Amino acid and Its metabolites	Small Peptide	C17H33N3O4S1	3	0.7553	-	834185	790128	845656	882218	951037	949326	1.14455
MW0159139	Val-Pro-Glu-Lys-Lys	No result	No result	No result	No result	No result	No result	Amino acid and Its metabolites	Small Peptide	C27H49N7O8	3	0.7359	-	248010	287446	282496	337496	412610	380244	1.18155
MW0008812	Nafamostat	81525-10-2 82956-11-4 880-36-4	No result	No result	D08240	BSPBio_001194	No result	Benzene and substituted derivatives	Benzene and substituted derivatives	C19H17N5O2	3	0.6584	-	151398	147712	149634	63770.2	42334.3	30314.7	1.22901
MW0006250	Etalocib	161172-51-6	No result	No result	D04074	PDSP1_001237 PDSP2_001221	No result	Benzene and substituted derivatives	Benzene and substituted derivatives	C33H33FO6	3	0.8926	161172-51-6 | 152608-41-8	112278	153157	83429.2	13885.5	6455.47	16352.9	1.24853
MW0115754	(+)-2,3-Dihydro-3-methyl-1H-pyrrole	No result	No result	No result	No result	No result	No result	Heterocyclic compounds	Heterocyclic compounds	C5H9N	3	0.6855	-	269749	255299	235012	138505	156362	153053	1.27245
MW0103434	8-Hydroxydeoxyguanosine 5'-monophosphate	127027-50-3	CHEBI:63223	No result	C19968	No result	No result	Nucleotide and Its metabolites	Nucleotide and Its metabolites	C10H14N5O8P	3	0.8038	127027-50-3	231799	207470	186958	87855.2	74626.9	151854	1.11017
MW0158488	Tyr-His-Phe-Lys	No result	No result	No result	No result	No result	No result	Amino acid and Its metabolites	Small Peptide	C30H39N7O6	3	0.6432	-	154153	157886	126572	37184.9	43688.3	45855.8	1.28486
MW0151100	His-Thr-Phe			No result				Amino acid and Its metabolites	Small Peptide	C19H25N5O5	3	0.759	-	876602	860669	783588	949373	988612	894100	1.02594
MW0154105	N,N,N',N'-Tetramethyl-p-phenylenediamine dihydrochloride	637-01-4 75005-95-7	No result	No result	No result	No result	No result	Benzene and substituted derivatives	Benzene and substituted derivatives	C10H18Cl2N2	3	0.637	637-01-4	241252	232365	172176	108254	110192	116724	1.23183
MW0152601	Leu-Glu	No result	No result	HMDB0028928	No result	No result	No result	Amino acid and Its metabolites	Small Peptide	C11H20N2O5	2	0.8926	16364-31-1	649338	628587	599251	491322	548333	527391	1.18926
MEDN0068	S-(5-Adenosy)-L-Homocysteine							Nucleotide and Its metabolites	Nucleotide and Its metabolites	C14H20N6O5S	1a	0.8293	979-92-0	60374	77080.1	73076.4	150974	190532	178951	1.26937
MEDN1306	Ureidosuccinic acid							Amino acid and Its metabolites	Amino acid derivatives	C5H8N2O5	1b	0.6897	-	40203.9	33386.7	28571.3	124986	152756	132750	1.28275
MW0138088	Epothilone B							Aldehyde,Ketones,Esters	Ketones	C27H41NO6S	3	0.7512	152044-54-7	231227	148942	130835	58630	63421.5	80980.9	1.19052
MW0004669	Aminosalicylic Acid	6018-19-5 65-49-6 89-57-6	No result	HMDB0014378	C02518 D00162	BSPBio_001834 IDI1_000350 Spectrum5_000804	No result	Benzene and substituted derivatives	Benzene and substituted derivatives	C7H7NO3	2	0.924	65-49-6	180310	164338	152885	62943.6	64609.9	62294.2	1.29337
MEDN1778	Dodecyl glucopyranoside							Carbohydrates and Its metabolites	Carbohydrates and Its metabolites	C18H36O6	1a	0.9254	59122-55-3 | 85618-22-0	30472.6	29381.3	29381	120214	132808	143806	1.29688
MW0126549	Silodosin							Heterocyclic compounds	Heterocyclic compounds	C25H32F3N3O4	3	0.7551	160970-54-7	106512	116064	41931	210330	180918	179199	1.02922
MW0151499	Ile-Leu-Tyr	No result	No result	No result	No result	No result	No result	Amino acid and Its metabolites	Small Peptide	C21H33N3O5	3	0.7329	-	230205	223496	199099	114327	105754	126859	1.27067
MW0009985	Trimethoprim	738-70-5 8064-90-2	No result	HMDB0014583	C01965 D00145	BPBio1_000215 BSPBio_000195 BSPBio_002245 IDI1_000589 Lopac0_001271 Oprea1_495058 Prestwick2_000208 Prestwick3_000208 SMP2_000262 Spectrum5_001559	No result	Benzene and substituted derivatives	Phenolics	C14H18N4O3	3	0.75	738-70-5	264672	238182	192710	106583	143721	140355	1.17835
MW0148162	D-arabino-hex-3-ulose 6-phosphate	No result	CHEBI:27973	No result	C06019	No result	No result	Organic acid and Its derivatives	Organic acid and Its derivatives	C6H13O9P	3	0.689	53010-97-2	439543	355319	395257	452796	564228	476704	1.01739
MW0107943	DL-Proline	147-85-3 25191-13-3 344-25-2 609-36-9 6265-82-3	CHEBI:26271	No result	No result	No result	No result	Amino acid and Its metabolites	Amino acids	C5H9NO2	3	0.7228	-	158017	186243	137974	61116.4	44783.5	72847.8	1.23463
MEDP0588	Ritalinic acid							Organic acid and Its derivatives	Organic acid and Its derivatives	C13H17NO2	1b	0.6752	19395-41-6	133606	116545	107531	208729	234513	217526	1.26609
MW0004036	Isovanillic acid	645-08-9	CHEBI:63798 CHEBI:63797	HMDB0060003	No result	No result	No result	Benzene and substituted derivatives	Benzene and substituted derivatives	C8H8O4	3	0.5384	-	138249	130073	110885	24047.3	27185.5	25434.7	1.29422
MEDN0230	Lactulose							Carbohydrates and Its metabolites	Sugars	C12H22O11	2	0.9066	4618-18-2	98765	98706.3	174042	247820	245015	180939	1.06983
MW0108761	Neocasomorphin(1-5)	No result	No result	No result	No result	No result	No result	Amino acid and Its metabolites	Small Peptide	C29H41N5O9	3	0.6534	-	334536	223333	181419	161005	129382	147710	1.03142
MW0158301	Trp-Ile							Amino acid and Its metabolites	Small Peptide	C17H23N3O3	3	0.6416	64339-42-0	131860	117380	76600.6	220853	180721	225405	1.14646
MW0152474	Leu-Pro-Trp							Amino acid and Its metabolites	Small Peptide	C22H30N4O4	3	0.797	-	212597	218748	210272	108570	117418	114940	1.29516
MW0145544	Arg-Tyr-Ile-Arg	No result	No result	No result	No result	No result	No result	Amino acid and Its metabolites	Small Peptide	C27H46N10O6	3	0.6424	-	137668	142131	122373	36385.7	27944.9	37213.5	1.28643
MW0123196	4-Chloro-2-nitrobenzylalcohol	52665-69-7 53744-50-6	No result	No result	No result	No result	No result	Heterocyclic compounds	Heterocyclic compounds	C29H37N3O6	3	0.7578	-	134798	131053	124348	4619.22	43910.3	43713.8	1.00377
MW0158548	Tyr-Lys-Tyr							Amino acid and Its metabolites	Small Peptide	C24H32N4O6	3	0.7524	-	202416	205193	153419	74316.9	96829.9	92323.7	1.23324
MW0155388	Phe-Tyr-Lys-Arg	No result	No result	No result	No result	No result	No result	Amino acid and Its metabolites	Small Peptide	C30H44N8O6	3	0.7553	-	125482	125652	218140	80973.1	30129.1	61997.5	1.08249
MW0153138	Lys-Ser-Thr-Leu-Thr	No result	No result	No result	No result	No result	No result	Amino acid and Its metabolites	Small Peptide	C23H44N6O9	3	0.7595	-	355456	352427	314423	489278	435609	393572	1.11777
MW0126432	Resorufin	34994-50-8 635-78-9	CHEBI:51602	No result	No result	BCBcMAP01_000141 SMP1_000256	No result	Heterocyclic compounds	Heterocyclic compounds	C12H7NO3	2	0.9363	635-78-9	114479	108333	105754	15442.4	16056.1	1732.82	1.13938
MW0156164	Protoverine	76-45-9	CHEBI:8596	No result	C10817	No result	No result	Alkaloids	Alkaloids	C27H43NO9	3	0.5252	76-45-9	322973	300116	224731	165524	191258	195788	1.1219
MW0109314	Prolylglycine	2578-57-6	CHEBI:61695 CHEBI:61696 CHEBI:73594	No result	No result	No result	No result	Amino acid and Its metabolites	Small Peptide	C7H12N2O3	3	0.6588	2578-57-6	305668	284234	256876	177268	185490	189079	1.26023
MW0012348	(9Z,11E,13S,15Z)-13-Hydroxyoctadeca-9,11,15-trienoic acid	No result	CHEBI:80442 CHEBI:84441	No result	C16316	No result	No result	FA	Oxidized lipids	C18H30O3	3	0.7788	87984-82-5	252477	238133	208359	122819	140257	141089	1.25589
MEDL02283	3-Methoxyanthranilate	3177-80-8 7343-11-5	CHEBI:27440 CHEBI:20109	HMDB0060374	C05831	No result	No result	Benzene and substituted derivatives	Benzene and substituted derivatives	C8H9NO3	3	0.654	-	251771	239467	152022	107768	118878	121939	1.13504
MW0106475	Dioctyltin bis(2-ethylhexyl thioglycolate)	15571-58-1 71061-19-3	No result	HMDB0031615	No result	No result	No result	Heterocyclic compounds	Heterocyclic compounds	C36H72O4S2Sn	3	0.7509	15571-58-1	188953	123807	32508.7	22628.1	4377.15	24088	1.01676
MW0148126	Phosphopantothenic acid							Organic acid and Its derivatives	Organic acid and Its derivatives	C9H18NO8P	3	0.6385	5875-50-3	89086.4	76764.3	65672.7	271140	128486	125517	1.05891
MW0124710	Lorcaserin sulfamate							Heterocyclic compounds	Heterocyclic compounds	C11H14ClNO3S	3	0.6777	-	141943	150329	175094	240655	281804	238088	1.23184
MW0109597	Selfotel			No result	C13735 D02410	PDSP2_001471	No result	Organic acid and Its derivatives	Phosphoric acids	C7H14NO5P	3	0.73	110347-85-8 | 113229-62-2	236253	256724	317977	328019	390217	385097	1.08286
MW0011239	Dihydroroseoside							Others	Hydrocarbon derivatives	C19H32O8	3	0.5967	142235-28-7	110265	125187	113253	191010	238879	211182	1.26263
MW0054632	Mabiogenin 3-[rhamnosyl-(1->6)-glucoside]							Steroids	Steroid	C42H68O14	3	0.6625	-	187549	173666	149645	69644.8	76830.4	73866.4	1.28101
MW0158447	Tyr-Gln-Val-Arg							Amino acid and Its metabolites	Small Peptide	C25H40N8O7	3	0.8986	-	152558	134213	158812	208916	328954	196661	1.05877
MW0147518	cis-1,2-Dihydro-3-ethylcatechol							Benzene and substituted derivatives	Benzene and substituted derivatives	C8H12O2	3	0.6158	66008-19-3	187423	214188	260484	273255	335524	342230	1.09068
MW0159193	Val-Thr-Tyr-Lys	No result		No result		No result		Amino acid and Its metabolites	Small Peptide	C24H39N5O7	2	0.9438	-	227950	239356	204772	311004	330859	318947	1.25341
MW0114039	Carbomycin	4564-87-8	No result	No result	No result	No result	No result	Heterocyclic compounds	Heterocyclic compounds	C42H67NO16	3	0.889	4564-87-8	116844	173125	193692	80019.1	63031.6	51944.8	1.19092
MW0008759	N1-(2-aminophenyl)-N8-phenyloctanediamide	537034-17-6	CHEBI:61077	No result	No result	Probes2_000493 SMP2_000157	No result	Benzene and substituted derivatives	Benzene and substituted derivatives	C20H25N3O2	3	0.8481	537034-17-6	430274	461372	530640	557599	583401	569759	1.08198
MW0005980	Alfentanil	69049-06-5 71195-58-9	CHEBI:2569	HMDB0014940	C08005 D07122	No result	No result	Benzene and substituted derivatives	Benzene and substituted derivatives	C21H32N6O3	3	0.5746	71195-58-9	304524	301324	260555	180267	208238	189618	1.23562
MW0158495	Tyr-Ile-Arg-Asp	No result	No result	No result	No result	No result	No result	Amino acid and Its metabolites	Small Peptide	C25H39N7O8	3	0.728	-	280981	233009	260965	203952	106783	176442	1.0089
MW0006612	Diethylenetriamine crosslinked with epichlorohydrin	14860-49-2	No result	HMDB0032216	D07716	No result	No result	Benzene and substituted derivatives	Benzene and substituted derivatives	C14H22ClNO	3	0.6191	25085-17-0	156345	137192	116292	38553.1	38118.3	45477.8	1.28162
MW0126434	Retreversine	No result	No result	No result	No result	No result	No result	Heterocyclic compounds	Heterocyclic compounds	C21H27N7O	3	0.6355	-	119356	122746	116431	21760.4	26576.6	24758.6	1.29586
MW0107889	Liothyronine							Hormones and hormone related compounds	Hormones and hormone related compounds	C15H12I3NO4	3	0.6442	-	48584.1	47558.5	50780	151296	141082	139400	1.29749
MW0147374	Chivosazole B	No result	CHEBI:80058	No result	C15729	No result	No result	Heterocyclic compounds	Heterocyclic compounds	C48H69NO12	3	0.6314	-	125071	101687	97403.9	7920.47	10729.8	20896.5	1.25384
MW0144107	9,10-Dihydrokadsurenone	No result	CHEBI:2328	No result	C11053	No result	No result	Aldehyde,Ketones,Esters	Ketones	C21H26O5	3	0.6811	-	207853	227293	200426	106517	117658	126963	1.27107
MW0124701	Lomefloxacin	98079-51-7 98079-55-1 98079-62-0	CHEBI:116278	HMDB0015113	C07078	BPBio1_000347 BSPBio_000315 BSPBio_003107 IDI1_000365 Lopac0_000678 Prestwick2_000238 Prestwick3_000238 SMP1_000287 Spectrum5_001246	No result	Others	Medicine	C17H19F2N3O3	3	0.6485	98079-51-7	274096	258131	248579	209249	118327	168960	1.0655
MW0123504	Decitabine	2353-33-5	CHEBI:50131	HMDB0015391	D03665	MolMap_000063	No result	Heterocyclic compounds	Heterocyclic compounds	C8H12N4O4	3	0.7391	2353-33-5	195064	186209	159279	89889.4	73413.2	93238.9	1.25965
MEDN1116	Aldosterone	10328-70-8 52-39-1	CHEBI:27584	No result	C01780	No result	SR-01000838883-2	Aldehyde,Ketones,Esters	Ketones	C21H28O5	1b	0.7693	52-39-1	129283	115992	108821	23209.8	29371.4	17776.2	1.27747
MW0148894	Endomorphin 2	No result	No result	No result	No result	No result	No result	Heterocyclic compounds	Heterocyclic compounds	C32H37N5O5	3	0.7391	-	199793	174133	266106	121978	106928	127758	1.17405
MW0107005	Gln-Tyr	No result	No result	HMDB0028809	No result	No result	No result	Amino acid and Its metabolites	Small Peptide	C14H19N3O5	3	0.6603	457662-02-1	145050	110230	94347.6	24222.5	22558.5	20429.9	1.28303
MW0168838	Betaine aldehyde	7418-61-3 77671-29-5	CHEBI:15710	HMDB0001252	C00576	Lopac0_000182	No result	Aldehyde,Ketones,Esters	Aldehydes	C5H12NO	3	0.6256	7418-61-3	298173	305025	333385	224176	209245	220965	1.26879
MW0157934	Tiliacorine	27073-72-9 27073-72-9 27073-73-0 27073-73-0	CHEBI:9597	No result	C09667	No result	No result	Lignans and Coumarins	Lignans	C36H36N2O5	3	0.6673	-	103584	96299.5	109128	10400.3	8586.94	8492.52	1.29769
MW0145968	L-Asparaginyl-L-asparagine	No result	CHEBI:73406	No result	No result	No result	No result	Amino acid and Its metabolites	Small Peptide	C8H14N4O5	3	0.7007	58471-52-6	619134	601890	621745	516061	521258	524077	1.28806
MW0159232	Val-Val-Asn	No result	No result	No result	No result	No result	No result	Amino acid and Its metabolites	Small Peptide	C14H26N4O5	3	0.7558	-	602472	576327	501263	617062	678638	665448	1.01697
MW0063417	Salvinorin A	83729-01-5	CHEBI:67900	No result	C20196	PDSP2_001236	No result	Heterocyclic compounds	Heterocyclic compounds	C23H28O8	3	0.7215	83729-01-5	110502	122075	91060.8	12885.7	16316.2	13693.9	1.2919
MW0110462	Verruculotoxin	56092-63-8 6343-95-9 6343-97-1	CHEBI:9969	No result	C10624	No result	No result	Heterocyclic compounds	Heterocyclic compounds	C15H20N2O	3	0.5181	56092-63-8	120721	122489	126355	29114.4	31975.7	28513.6	1.29792
MW0140282	(2R)-2-[[(2S,3R)-3-amino-2-hydroxy-4-phenyl-butanoyl]amino]-4-methyl-pentanoic acid							Organic acid and Its derivatives	Organic acid and Its derivatives	C16H24N2O4	3	0.7997	-	102099	101929	120183	5954.22	6354.9	31987.4	1.17234
MW0141972	2,3,4-Trioxycyclopentanone	No result	CHEBI:31068	No result	C12261	No result	No result	Aldehyde,Ketones,Esters	Ketones	C14H26O4Si	3	0.5825	-	156815	161430	154423	61973.4	64984.5	65973.9	1.29809
FDATN01145	Afatinib dimaleate	850140-73-7	CHEBI:76003	No result	D09733	No result	No result	Others	Medicine	C32H33ClFN5O11	3	0.6578	850140-73-7	153508	123736	102891	35817.4	33102.6	31812.4	1.27913
MW0009707	Salicin	138-52-3	CHEBI:17814	HMDB0003546	C01451	ACon1_000373 IDI1_000030 MEGxp0_000685 Spectrum5_000971	No result	Benzene and substituted derivatives	Benzene and substituted derivatives	C13H18O7	3	0.7606	138-52-3	154540	76872.6	85772.3	12459.6	5638.3	20825.6	1.20747
MW0006146	3-(dimethylamino)-N-(3-(4-hydroxybenzamido)-4-methylphenyl)benzamide	208260-29-1 21323-32-0	No result	No result	No result	BSPBio_001240 Bio1_000368 Bio1_000857 Bio1_001346 Bio2_000460 Bio2_000940 BiomolKI2_000059 BiomolKI_000053 IDI1_002215	No result	Benzene and substituted derivatives	Benzene and substituted derivatives	C23H23N3O3	3	0.7602	208260-29-1	170466	157985	152197	62358.5	82562.6	58195.5	1.25845
MW0158550	Tyr-Lys-Val-Glu-Ile	No result	No result	No result	No result	No result	No result	Amino acid and Its metabolites	Small Peptide	C31H50N6O9	3	0.7572	-	158684	141677	120160	43413.8	51272.8	48386.5	1.28016
MW0150940	His-Gly-Leu							Amino acid and Its metabolites	Small Peptide	C14H23N5O4	3	0.7837	-	233571	238512	323667	186123	164972	167425	1.14589
MW0139091	Caffeoylferuloylspermidine	No result	No result	HMDB0033470 HMDB0038843	No result	No result	No result	Heterocyclic compounds	Heterocyclic compounds	C26H33N3O6	3	0.7828	114916-07-3	228503	250880	181008	105832	147725	129948	1.15908
MW0124952	(1-(5-Fluoropentyl)-1H-indol-3-yl)(naphthalen-1-yl)methanone	335161-24-5	No result	No result	No result	No result	No result	Aldehyde,Ketones,Esters	Ketones	C24H22FNO	3	0.7379	-	138609	119708	107941	23466.9	33625.2	32518.3	1.27605
MW0141056	p-(1-Methyl-2,2-diphenylvinyl)anisole	13560-37-7 1574-34-1	CHEBI:79697	No result	C15179	No result	No result	Heterocyclic compounds	Heterocyclic compounds	C22H20O	2	0.9047	13560-37-7	179073	175162	189222	87946.5	93002.8	86044	1.29424
MW0103715	Zeatin riboside							Nucleotide and Its metabolites	Nucleotide and Its metabolites	C15H21N5O5	3	0.7237	6025-53-2 | 28542-78-1	12922	38356.9	74393.4	103494	110865	187753	1.01543
MW0151860	Isoprothiolane sulfoxide							Organic acid and Its derivatives	Organic acid and Its derivatives	C12H18O5S2	3	0.593	52303-69-2	140731	47937.9	51400.2	162653	205361	148218	1.00718
MW0155986	Pro-Pro-Val	No result	No result	No result	No result	No result	No result	Amino acid and Its metabolites	Small Peptide	C15H25N3O4	3	0.7928	-	293676	279054	226070	160362	185512	177103	1.19231
MW0168601	4-Hydroxybenzaldehyde							Benzene and substituted derivatives	Benzene and substituted derivatives	C7H6O2	2	0.9829	123-08-0	11391.7	12295.1	12133.9	96669.3	101300	113620	1.2985
MW0009297	Oxatomide	60607-34-3	No result	HMDB0240225	D01773	CBMicro_024634 Lopac0_000924 Oprea1_338592	No result	Benzene and substituted derivatives	Benzene and substituted derivatives	C27H30N4O	3	0.8264	60607-34-3	188286	176597	175409	83329.2	79917.9	101905	1.27001
MEDTP00842	Glu-Glu-Ile	No result	CHEBI:73492	No result	No result	No result	No result	Amino acid and Its metabolites	Small Peptide	C16H27N3O8	3	0.6383	-	103851	138124	161067	46042.3	42673.4	39245.3	1.26363
MW0144747	Ala-Thr-Ile-Lys	No result	No result	No result	No result	No result	No result	Amino acid and Its metabolites	Small Peptide	C19H37N5O6	3	0.697	-	200435	199836	204610	116320	112527	101147	1.28751
MW0156832	Ser-Leu-Val							Amino acid and Its metabolites	Small Peptide	C14H27N3O5	3	0.7979	-	442767	443596	401779	333187	358016	322176	1.21644
MW0168488	2-Chloro-3-Deazaadenosine							Benzene and substituted derivatives	Benzene and substituted derivatives	C11H13ClN4O4	3	0.7933	40656-71-1	47713.3	17657	36663	109237	126385	140854	1.18851
MW0050739	1-(5Z,8Z,11Z,14Z,17Z-eicosapentaenoyl)-2-(7Z,10Z,13Z,16Z-docosatetraenoyl)-sn-glycerol							GL	DG	C45H70O5	3	0.6691	-	55746.5	66459.4	55846.3	209561	118460	123981	1.19365
MW0150986	His-Leu-Asp-Gln-Gln	No result	No result	No result	No result	No result	No result	Amino acid and Its metabolites	Small Peptide	C26H41N9O10	3	0.7278	-	143408	135986	123865	29344.2	51083.5	48976.9	1.23863
MW0195169	Glutathione Reducedform							Amino acid and Its metabolites	Small Peptide	C10H17N3O6S	3	0.7361	-	19818.5	20814.5	1008.95	97644.9	103429	113842	1.03474
MW0063484	Sebacic acid							FA	FFA	C10H18O4	2	0.9827	111-20-6	205575	192607	170741	246611	340902	254464	1.11262
FDATP00950	Oxprenolol hydrochloride	22972-97-0 29181-23-5 6452-73-9 6629-50-1	No result	No result	D01806	No result	No result	Others	Medicine	C15H24ClNO3	3	0.641	6452-73-9 | 22972-97-0	147524	147119	128603	47115.3	53315.9	49761.7	1.29175
MW0152434	Leu-Met-His	No result	No result	No result	No result	No result	No result	Amino acid and Its metabolites	Small Peptide	C17H29N5O4S1	3	0.7122	-	250218	253312	256993	138382	193083	158278	1.19141
MW0159289	Val-Met							Amino acid and Its metabolites	Small Peptide	C10H20N2O3S	3	0.8963	14486-09-0	199934	192729	144661	239757	290578	276263	1.1307
MW0053663	Glucoconvallatoxoloside	No result	No result	HMDB0030010	No result	No result	No result	Benzene and substituted derivatives	Benzene and substituted derivatives	C41H64O20	3	0.6188	-	140640	140495	145724	48663	46889.8	62329.8	1.2793
MW0145418	Arg-Leu-Leu-Asn-Asn	No result	No result	No result	No result	No result	No result	Amino acid and Its metabolites	Small Peptide	C26H48N10O8	3	0.7568	-	303341	278110	331270	337886	415027	427913	1.06532
MW0155857	Pro-Glu-Leu-Ala-Lys	No result	No result	No result	No result	No result	No result	Amino acid and Its metabolites	Small Peptide	C25H44N6O8	3	0.8479	-	244338	200042	153567	242902	314836	308045	1.00134
MW0158353	Tyr-Ala-Glu-Leu-Arg	No result	No result	No result	No result	No result	No result	Amino acid and Its metabolites	Small Peptide	C29H46N8O9	3	0.6365	-	138275	143232	131265	46996.1	48777.9	50463	1.2973
MW0145407	Arg-Leu-Arg-Glu-Lys	No result	No result	No result	No result	No result	No result	Amino acid and Its metabolites	Small Peptide	C29H56N12O8	3	0.5533	-	111687	115607	79744.3	16237.7	15373.3	9085.08	1.27123
MEDTP02919	Soyasaponin I	51330-27-9 56964-87-5	CHEBI:9211	No result	C08983	No result	No result	Terpenoids	Triterpene Saponin	C48H78O18	3	0.7748	51330-27-9	220078	218839	198566	111877	131171	128405	1.26843
MW0122760	Alcaftadine	147084-10-4	CHEBI:71023	HMDB0015670	D06552	No result	No result	Heterocyclic compounds	Heterocyclic compounds	C19H21N3O	3	0.623	147084-10-4	231093	201163	187960	107170	124772	122253	1.25246
FDATN01410	Endothal-disodium	11096-76-7 1121-37-5 129-67-9 33054-59-0	CHEBI:81916	No result	C18724	No result	No result	Others	Others	C8H8Na2O5	3	0.5916	-	119028	189568	88532.8	46400.4	32698.2	52167	1.1695
MW0008242	N-(3-nitrophenyl)decanamide							Benzene and substituted derivatives	Benzene and substituted derivatives	C16H24N2O3	3	0.7565	72298-61-4	24742.7	49866.1	29777.6	106333	136254	127295	1.23115
MW0000060	11-Hydroxytubotaiwine	No result	No result	HMDB0040799	No result	No result	No result	Alkaloids	Alkaloids	C20H24N2O3	3	0.6827	-	245091	245060	136484	120855	120573	119714	1.03767
MW0063285	Quillaic acid 3-[xylosyl-(1->3)-[galactosyl-(1->2)]-glucuronide]							Terpenoids	Triterpene Saponin	C47H72O20	3	0.7265	97892-86-9	122234	124804	108705	25628.9	31401.7	33767.3	1.2877
MW0006222	(E)-N-(2-(((3-(4-Chlorophenyl)allyl)(methyl)amino)methyl)phenyl)-4-methoxybenzenesulfonamide	No result	No result	No result	No result	HSCI1_000373	No result	Benzene and substituted derivatives	Benzene and substituted derivatives	C24H25ClN2O3S	3	0.73	176708-42-2	210930	191690	198751	108435	117195	111266	1.28972
MW0127037	JWH 018 N-(5-hydroxypentyl) beta-D-Glucuronide							Organic acid and Its derivatives	Organic acid and Its derivatives	C30H31NO8	3	0.7383	-	97665.8	97620.9	85857.9	5597.39	7085.91	5649.73	1.29708
MW0125999	Oxcarbazepine	28721-07-5	CHEBI:7824	HMDB0014914	C07492 D00533	BSPBio_003457 Spectrum5_001869	No result	Heterocyclic compounds	Heterocyclic compounds	C15H12N2O2	3	0.7784	28721-07-5	104308	92603.5	105419	15126.7	7281.65	17371.1	1.25865
MW0153185	Lys-Tyr-Thr-Arg	No result	No result	No result	No result	No result	No result	Amino acid and Its metabolites	Small Peptide	C25H42N8O7	3	0.7479	-	122597	118197	165266	45520.9	48610.4	49565.6	1.27099
MW0115408	Trehalose							Carbohydrates and Its metabolites	Sugars	C12H22O11	2	0.8464	99-20-7	106867	120191	94017.2	224520	232918	124250	1.02986
MW0112057	1-[5-(1,2,3,4-tetrahydroxybutyl)-1H-imidazol-2-yl]ethanone							Heterocyclic compounds	Heterocyclic compounds	C9H14N2O5	3	0.7836	95120-07-3 | 94944-70-4	293441	182617	162946	128075	125271	125609	1.04724
MW0151414	Ile-Glu-Glu							Amino acid and Its metabolites	Small Peptide	C16H27N3O8	3	0.7511	-	153188	100575	163946	46026.2	52884.2	59166.3	1.2246
MW0156395	Ridaforolimus							Others	Medicine	C53H84NO14P	3	0.8426	572924-54-0	171400	195338	182465	261427	264227	283048	1.26632
MW0107794	Leu-Gly	686-50-0 70205-04-8	No result	No result	No result	No result	No result	Amino acid and Its metabolites	Small Peptide	C8H16N2O3	2	0.9158	686-50-0	228721	223225	227400	138520	123906	157810	1.24898
MW0169780	Risperidone	106266-06-2	No result	HMDB0005020	D00426	No result	No result	Aldehyde,Ketones,Esters	Ketones	C23H27FN4O2	3	0.7654	106266-06-2	112696	119927	188285	60767.7	46424.1	54700.1	1.21347
MW0002702	2-Aminoanthraquinone							Benzene and substituted derivatives	Benzene and substituted derivatives	C14H9NO2	3	0.6748	117-79-3	11122.7	12005.5	10423.9	92374.3	105121	95000.4	1.2983
MW0151666	Ile-Asp	54532-76-2	No result	HMDB0028903	No result	No result	No result	Amino acid and Its metabolites	Small Peptide	C10H18N2O5	2	0.9013	-	656441	704241	629073	745733	744949	757463	1.14275
MW0158300	Trp-HoPhe-OH	No result	No result	No result	No result	No result	No result	Amino acid and Its metabolites	Small Peptide	C27H25N3O6	3	0.744	-	118855	103374	101397	19192.9	23433.9	24781.3	1.29073
MW0126337	Pyridoxamine phosphate	529-96-4	CHEBI:18335	HMDB0001555	C00647	No result	No result	Organic acid and Its derivatives	Organic acid and Its derivatives	C8H13N2O5P	3	0.796	529-96-4	84474.2	123349	66566.4	4541.35	9214.71	4562.28	1.26998
MW0153028	Lys-Leu-Asn-His-Gln	No result	No result	No result	No result	No result	No result	Amino acid and Its metabolites	Small Peptide	C27H46N10O8	3	0.701	-	164083	181861	121665	61375.2	69372.9	80878	1.21963
MW0054114	Isopentenyl pyrophosphate							Organic acid and Its derivatives	Phosphoric acids	C5H12O7P2	3	0.7657	358-71-4	97476.6	85775	68290.9	168649	162856	175767	1.24488
MW0103380	3'-Uridylic acid	35170-03-7 35170-03-7 84-53-7 90389-07-4	CHEBI:28895 CHEBI:60784	HMDB0060282	C01368	No result	No result	Nucleotide and Its metabolites	Nucleotide and Its metabolites	C9H13N2O9P	2	0.9822	84-53-7	314619	352946	315172	391405	418146	428161	1.20689
MW0157558	Thr-Arg-Ser							Amino acid and Its metabolites	Small Peptide	C13H26N6O6	3	0.7548	-	36266.1	21946.4	50231.8	121128	127802	112927	1.21283
MW0154157	3-Hydroxy-N-[(3S)-tetrahydro-2-oxo-3-furanyl]-octanamide							Alcohol and amines	Amines	C12H21NO4	3	0.6833	192883-14-0	233930	203793	178958	109696	133370	120364	1.22101
MW0157613	Thr-Gln-Leu-Lys	No result	No result	No result	No result	No result	No result	Amino acid and Its metabolites	Small Peptide	C21H40N6O7	3	0.7551	-	123525	165943	135075	58619.5	53199	59493.5	1.27263
MW0110229	H-Tyr-tyr-tyr-OH	7390-78-5	No result	No result	No result	No result	No result	Amino acid and Its metabolites	Small Peptide	C27H29N3O7	3	0.7117	7390-78-5	189337	144827	154919	66565.6	88812.4	80662.8	1.23696
MW0052883	Farnesyl diphosphate	13058-04-3 13145-41-0 372-97-4	CHEBI:17407	HMDB0000961	C00448	No result	No result	Organic acid and Its derivatives	Phosphoric acids	C15H28O7P2	3	0.71	13058-04-3	92449.3	92148.3	77367.4	5637.94	3035.57	591.51	1.22187
MW0144491	Ala-Asn-Glu-Arg	No result	No result	No result	No result	No result	No result	Amino acid and Its metabolites	Small Peptide	C18H32N8O8	3	0.7592	-	217071	222853	179207	108200	135552	122980	1.22146
MW0134170	5,7-dihydroxy-6-[3,4,5-trihydroxy-6-(hydroxymethyl)oxan-2-yl]-8-(3,4,5-trihydroxyoxan-2-yl)-2-(2,4,5-trihydroxyphenyl)-4H-chromen-4-one							Aldehyde,Ketones,Esters	Ketones	C26H28O16	3	0.6661	-	28493.7	31407.9	36446.9	104003	122532	121615	1.28822
MW0144451	Ala-Ala-Ala-Arg-Phe	No result	No result	No result	No result	No result	No result	Amino acid and Its metabolites	Small Peptide	C24H38N8O6	3	0.7807	-	355418	371441	319620	395499	453205	448793	1.12499
MW0152606	Leu-Gly-Pro	No result	CHEBI:6414	No result	C01833	No result	No result	Amino acid and Its metabolites	Small Peptide	C13H23N3O4	3	0.7557	10183-38-7	118013	96242.1	88820.6	14380.3	18479.7	19598.3	1.28619
MW0008568	N,N-Didemethylorphenadrine	17349-96-1	No result	HMDB0061165	No result	No result	No result	Benzene and substituted derivatives	Benzene and substituted derivatives	C16H19NO	3	0.6241	-	155996	156903	161405	72697.9	75725.1	75378.1	1.29845
MW0142584	Undeca-2-ene-8,10-diynoic acid isobutylamide	120727-28-8 663949-78-8 99615-81-3	No result	No result	No result	No result	No result	Organic acid and Its derivatives	Organic acid and Its derivatives	C15H21NO	3	0.8278	-	179024	180185	152764	83111	90409.2	87986.6	1.27984
MW0159913	Inosine	292853-81-7 58-63-9	CHEBI:17596	HMDB0000195	C00294 D00054	SMP1_000165 cMAP_000084	No result	Nucleotide and Its metabolites	Nucleotide and Its metabolites	C10H12N4O5	2	0.9469	58-63-9	160036	147229	115777	51285.1	61959.4	60120.3	1.2591
MW0107611	Kifunensine	109944-15-2	No result	No result	No result	SMP2_000350	No result	Heterocyclic compounds	Heterocyclic compounds	C8H12N2O6	3	0.7467	109944-15-2	175919	191643	180525	262717	271832	262707	1.2862
MW0149703	Gln-His-Leu-Phe-Gly	No result	No result	No result	No result	No result	No result	Amino acid and Its metabolites	Small Peptide	C28H40N8O7	3	0.7333	-	212700	238808	173299	136888	117453	122164	1.20091
MW0194056	Cephalomannine	71610-00-9	No result	No result	No result	No result	No result	Benzene and substituted derivatives	Benzene and substituted derivatives	C45H53NO14	3	0.74	71610-00-9	95338	85027.6	88130.1	3109.26	8230.27	9039	1.25817
MW0151475	Ile-Ile-Met							Amino acid and Its metabolites	Small Peptide	C17H33N3O4S1	3	0.7823	-	155024	150602	148313	63050.4	68836.2	74074.6	1.28999
MW0124489	Isopentenyladenine	2365-40-4	CHEBI:17660	No result	C04083	Oprea1_344117	No result	Nucleotide and Its metabolites	Nucleotide and Its metabolites	C10H13N5	2	0.9012	2365-40-4	369447	353354	324171	261005	272867	265927	1.24446
MW0123749	NSC250429	No result	No result	No result	No result	No result	No result	Aldehyde,Ketones,Esters	Ketones	C20H28O6	3	0.7763	-	338857	350368	347450	260643	266576	262378	1.29457
MW0001603	1-Hydroxy-2-naphthoic acid	31083-55-3 86-48-6 92-78-4 86-48-6	CHEBI:36108 CHEBI:15992	No result	C03203	Oprea1_291089	No result	Benzene and substituted derivatives	Benzene and substituted derivatives	C11H8O3	3	0.7951	-	360447	379108	393450	444948	481637	453483	1.22718
MW0015128	7,8-diaminopelargonate	157120-40-6 21738-21-6 22255-17-0	CHEBI:2247	No result	C01037	No result	No result	FA	Oxidized lipids	C9H20N2O2	3	0.787	-	158218	100080	144545	54208.1	54413.6	47700.2	1.2399
MW0168372	3'-Hydroxy-5'-(4-propylpiperazinyl)benzoxazinorifamycin	No result	No result	No result	No result	No result	No result	Others	Others	C50H62N4O13	3	0.6924	133633-12-2	105518	93452	80505.9	7827.09	9384.68	16330.4	1.27012
MW0156191	PtdIns-(1,2-dihexanoyl)	17754-91-5	No result	No result	No result	No result	No result	Organic acid and Its derivatives	Sulfonic acids	C21H39O13P	3	0.8193	-	122639	124087	98957.6	49588.7	40645.2	9770.96	1.05859
MEDP1055	DL-Glyceraldehyde 3-Phosphate	142-10-9 20283-52-7 591-59-3	CHEBI:17138	HMDB0001112	C00661	No result	No result	Carbohydrates and Its metabolites	Sugar derivatives	C3H7O6P	2	0.9359	591-59-3	67660.2	79801.9	102480	2716.54	2093.18	379.57	1.24451
MW0148714	dTDP-3-acetamido-3,6-dideoxy-alpha-D-galactopyranose							Nucleotide and Its metabolites	Nucleotide and Its metabolites	C18H29N3O15P2	3	0.6393	-	19861.9	15628.5	4017.52	91177	100242	92766.5	1.18101
MW0108337	4-[(E)-2-[2-(4-hydroxyphenyl)ethylamino]vinyl]-2,3-dihydropyridine-2,6-dicarboxylic acid							Organic acid and Its derivatives	Organic acid and Its derivatives	C17H18N2O5	3	0.8365	5589-85-5	195018	123528	135646	51801.1	44073.1	115458	1.02342
MW0139584	Rifabutin	No result	No result	No result	No result	No result	No result	Benzene and substituted derivatives	Benzene and substituted derivatives	C46H62N4O11	3	0.5281	72559-06-9	69159.6	110300	131966	25017.7	30090.8	13553.2	1.20525
MW0054647	Madecassol							Terpenoids	Triterpene Saponin	C48H78O19	2	0.8144	16830-15-2	226743	238311	216779	140144	145422	153686	1.28042
MW0017054	Chinenoside V	No result	No result	HMDB0031139	No result	No result	No result	Steroids	Steroid	C45H72O19	3	0.6629	170739-22-7	108734	85786.5	68807	2154.63	8737.98	9864.5	1.21675
MW0145854	Asn-Phe-Glu-Tyr-Ile							Amino acid and Its metabolites	Small Peptide	C33H44N6O10	3	0.6888	-	12292.2	26116.7	14077.5	96556	90308.4	106161	1.256
MW0141088	1,2-Bis(4-hydroxyphenyl)-2-propanol	154928-56-0	CHEBI:31035	No result	C13629	No result	No result	Heterocyclic compounds	Heterocyclic compounds	C15H16O3	3	0.7863	154928-56-0	130062	107495	93835.9	20603	41548.6	28958.1	1.2303
MW0156171	(2S)-N-(5-aminopentyl)-2-[[2-(1H-indol-3-yl)acetyl]amino]butanediamide							Heterocyclic compounds	Heterocyclic compounds	C19H27N5O3	3	0.678	117233-46-2 | 152886-77-6	79786	127933	116121	27878.7	28471.3	27508.6	1.27014
MW0154984	Penitrem E	No result	No result	No result	No result	No result	No result	Heterocyclic compounds	Heterocyclic compounds	C37H45NO6	3	0.7833	78213-66-8	101329	79404.9	88319.1	7043.39	13733.7	8476.46	1.27698
MW0147727	Coleon A	20309-48-2	No result	No result	No result	No result	No result	Aldehyde,Ketones,Esters	Ketones	C20H22O6	3	0.675	1984-44-7	400740	386363	326089	424584	457131	471161	1.05841
MW0158169	Trp-His-Tyr							Amino acid and Its metabolites	Small Peptide	C26H28N6O5	3	0.6306	-	95979.7	105299	80863.4	18209	3493.31	20758	1.14555
MW0133326	2-[4-[3-[3,4-Dihydroxy-4-(hydroxymethyl)oxolan-2-yl]oxy-4,5-dihydroxy-6-(hydroxymethyl)oxan-2-yl]oxyphenyl]-7-hydroxy-2,3-dihydrochromen-4-one							Heterocyclic compounds	Heterocyclic compounds	C26H30O13	3	0.5443	74639-14-8	19503.5	20800.3	14518.4	84457.7	105458	104484	1.28448
MW0122845	Amobarbital	57-43-2	CHEBI:2673	HMDB0015440	C07536 D00555	CBDivE_006514 IDI1_000994 Oprea1_587446	No result	Heterocyclic compounds	Heterocyclic compounds	C11H18N2O3	3	0.7855	57-43-2	118030	118038	100334	37868.5	23481.8	36148.4	1.26018
MW0142986	3-Hydroxy-L-tyrosyl-AMP							Nucleotide and Its metabolites	Nucleotide and Its metabolites	C19H23N6O10P	3	0.6017	-	6480.27	7440.92	5081.79	77286.3	84788.4	95365.5	1.2939
MW0110911	Aminopropylcadaverine	56-19-9	CHEBI:64860	HMDB0012189	C16565	No result	No result	Alcohol and amines	Polyamines	C8H21N3	3	0.832	56-19-9	279637	265843	261534	164260	219463	185368	1.16754
MW0145307	Arg-Asp-Val-Glu	No result	No result	No result	No result	No result	No result	Amino acid and Its metabolites	Small Peptide	C20H35N7O9	3	0.7685	-	99638.8	132899	144551	45631.1	38497.8	55067.4	1.2425
MW0155905	Pro-Ile-Val							Amino acid and Its metabolites	Small Peptide	C16H29N3O4	3	0.813	-	67445.9	27447.9	43411.9	76695.5	152328	147127	1.0812
MW0115269	Semilepidinoside B	No result	No result	HMDB0033108	No result	No result	No result	Benzene and substituted derivatives	Benzene and substituted derivatives	C17H22N2O7	3	0.7001	-	518924	546179	523258	589593	616966	619641	1.2385
MW0110150	Tryprostatin b	No result	CHEBI:72760	No result	C20512	No result	No result	Amino acid and Its metabolites	Small Peptide	C21H25N3O2	3	0.8018	179936-52-8	88351.4	93169	71447	6143.67	2407.04	6590.43	1.26755
MW0143978	7-Keto-dehydroepiandrosterone	566-19-8 63471-87-4	No result	No result	No result	No result	No result	Aldehyde,Ketones,Esters	Ketones	C19H26O3	3	0.8225	566-19-8	325103	301816	276562	207617	228172	230127	1.2162
MW0158377	Tyr-Arg-Ile-Glu	No result	No result	No result	No result	No result	No result	Amino acid and Its metabolites	Small Peptide	C26H41N7O8	3	0.7615	-	122602	86848.2	117245	17389.5	37846.3	34591.9	1.20433
MW0123463	Cycloheximide	66-81-9	CHEBI:27641	No result	C06685 D03625	BPBio1_000990 BSPBio_000900 BSPBio_003159 IDI1_000050 Prestwick2_000790 Prestwick3_000790 Spectrum5_001635	No result	Alcohol and amines	Amines	C15H23NO4	3	0.6791	66-81-9 | 1154-57-0	123967	115288	94712.8	31373.7	33825.9	32245.4	1.28816
MW0121653	5-Methyltetrahydrofolic acid	134-35-0 31690-09-2 134-35-0	CHEBI:15641	HMDB0001396	C00440 D09353	No result	No result	Organic acid and Its derivatives	Organic acid and Its derivatives	C20H25N7O6	2	0.9154	134-35-0 | 31690-09-2	125939	68430.7	94363.5	14151.5	29413.3	8670.2	1.18975
MW0147833	Crocetin gentiobiosylglucosyl ester	55750-84-0	CHEBI:62771	No result	C17513	No result	No result	Carbohydrates and Its metabolites	Carbohydrates and Its metabolites	C38H54O19	3	0.8121	55750-84-0	99758.5	60506.6	94260.9	4861.4	9975.69	3239.98	1.25538
MW0150921	His-Glu-Ile-Glu							Amino acid and Its metabolites	Small Peptide	C22H34N6O9	2	0.912	-	113326	137646	153868	195891	235632	209557	1.18737
MW0053633	Ginsenoside Ro	34367-04-9	CHEBI:67981	No result	C17543	No result	No result	Steroids	Steroid	C48H76O19	3	0.691	34367-04-9	223317	206758	202972	121332	136060	139506	1.26836
MW0157143	Soyasapogenol B	595-15-3 6118-01-0	CHEBI:9209	No result	C08980	No result	No result	Terpenoids	Triterpene	C30H50O3	3	0.5775	595-15-3	156271	150715	131671	60593.1	72058.6	70533	1.2752
MW0109774	Suberylglycine	60317-54-6	No result	HMDB0000953	No result	No result	No result	Amino acid and Its metabolites	Amino acid derivatives	C10H17NO5	3	0.6713	60317-54-6	220572	225924	204457	136176	136741	142948	1.2854
MW0145576	Arg-Val-Tyr-Phe-Phe	No result	No result	No result	No result	No result	No result	Amino acid and Its metabolites	Small Peptide	C38H50N8O7	3	0.7556	-	352400	336744	316201	380941	415090	444165	1.15386
MW0146296	Asp-Tyr-Asn-Leu-Leu	No result	No result	No result	No result	No result	No result	Amino acid and Its metabolites	Small Peptide	C29H44N6O10	3	0.7551	-	100297	157028	137857	42847.9	65817.1	51755.4	1.20344
MW0145248	Arg-Ala-Glu-Lys	No result	No result	No result	No result	No result	No result	Amino acid and Its metabolites	Small Peptide	C20H38N8O7	3	0.7594	-	117811	107448	97412.1	31730.4	38703.5	17836.5	1.22501
MEDL02295	Hordenine	3595-05-9 539-15-1 62493-39-4	CHEBI:5764	HMDB0004366	C06199	No result	No result	Benzene and substituted derivatives	Phenolics	C10H15NO	3	0.7507	539-15-1	335018	347002	328097	250466	268622	256642	1.27443
MW0015341	9S,11R-dihydroxy-15-oxo-5Z,13E-prostadienoic acid-cyclo[8S,12R]							Hormones and hormone related compounds	Hormones and hormone related compounds	C20H32O5	3	0.697	191919-01-4	181511	146523	141695	81789.3	81397.2	72225.7	1.26007
MW0107825	Leukotriene D4 methyl ester	No result	No result	No result	No result	No result	No result	Aldehyde,Ketones,Esters	Esters	C26H42N2O6S	3	0.7218	-	73332.7	80961.1	100531	3170.56	12264.8	5817.16	1.24141
MW0063718	Tafluprost acid	209860-88-8	No result	No result	No result	No result	No result	FA	Oxidized lipids	C22H28F2O5	3	0.8514	209860-88-8	58620.5	98314.1	81211.5	1197.7	1138.82	2394.25	1.28665
MW0145655	Asn-Ala-Gln							Amino acid and Its metabolites	Small Peptide	C12H21N5O6	3	0.6308	-	137673	127492	123796	49302.9	53528.1	52864.8	1.29467
MW0155979	Pro-Pro-Leu	No result	No result	No result	No result	No result	No result	Amino acid and Its metabolites	Small Peptide	C16H27N3O4	3	0.8255	-	214404	195917	186110	112097	122605	128588	1.26572
MW0168538	3-(2,5-dimethoxyphenyl)propanoic acid		No result		No result		No result	Organic acid and Its derivatives	Organic acid and Its derivatives	C11H14O4	3	0.7538	10538-49-5	221964	179486	159198	245623	278877	269245	1.12158
MW0130920	2-Cyano-3-[3-ethoxy-4-hydroxy-5-[(phenylthio)methyl]phenyl]-2-propenamide							Alcohol and amines	Amines	C19H18N2O3S	3	0.6769	107761-24-0	169565	153275	87258.2	49066.1	64148.5	63892.5	1.1355
MW0150185	Glu-Tyr-Asn-Lys	No result	No result	No result	No result	No result	No result	Amino acid and Its metabolites	Small Peptide	C24H36N6O9	3	0.8732	-	423164	352028	365486	415430	486109	471615	1.01981
MW0151338	Ile-Arg-Thr-Asp	No result	No result	No result	No result	No result	No result	Amino acid and Its metabolites	Small Peptide	C20H37N7O8	3	0.679	-	112446	93943.8	90236.2	33230	15461.3	15646	1.23643
MW0105712	L-Argininosuccinic acid	2387-71-5	No result	HMDB0000052	C03406	No result	No result	Amino acid and Its metabolites	Amino acid derivatives	C10H18N4O6	3	0.752	2387-71-5	182113	145167	120856	67807.8	79028.8	69184.8	1.22452
MW0155348	Phe-Thr-Gln							Amino acid and Its metabolites	Small Peptide	C18H26N4O6	3	0.6743	-	41973.3	75688.2	35189.8	157112	135456	92381.6	1.12017
MW0147803	Corynantheal	No result	CHEBI:80695	No result	C16735	No result	No result	Heterocyclic compounds	Heterocyclic compounds	C19H22N2O	3	0.6129	-	103511	108541	91038.4	24473.1	28548.8	18775.2	1.27859
MW0159068	Val-Leu-Leu-Ser-Cys	No result	No result	No result	No result	No result	No result	Amino acid and Its metabolites	Small Peptide	C23H43N5O7S	3	0.6942	-	112358	106478	101408	25916.7	32054	31321.5	1.29101
MW0123887	Ethenodeoxyadenosine	68498-25-9	No result	HMDB0001786	No result	No result	No result	Heterocyclic compounds	Heterocyclic compounds	C12H13N5O3	3	0.7328	68498-25-9	281464	262976	256819	319474	345996	366381	1.21471
MW0149232	Flumetover	154025-04-4	CHEBI:7266					Benzene and substituted derivatives	Benzene and substituted derivatives	C19H20F3NO3	3	0.8293	154025-04-4	209150	194107	186438	232007	287135	300530	1.14839
MW0168239	Protoveratrine B	124-97-0 146-91-8	CHEBI:8595	No result	C10816	BSPBio_003084 IDI1_000750 Spectrum5_001454	No result	Alkaloids	Alkaloids	C41H63NO15	3	0.6151	124-97-0	104097	104803	86401.8	19625.7	24827.8	20971.8	1.2896
MW0155255	Phe-Leu-Met	No result	No result	No result	No result	No result	No result	Amino acid and Its metabolites	Small Peptide	C20H31N3O4S1	3	0.7532	-	145621	124390	91104.8	65233.4	25108.9	41443.2	1.12736
MW0105623	Anandamide 0-phosphate							Alcohol and amines	Amines	C22H38NO5P	3	0.7474	183323-26-4	72818.3	29769.3	29223.3	113226	117302	130582	1.13765
FDATN00717	Acetylleucine	1188-21-2 19764-30-8 3612-98-4 99-15-0	No result	No result	D07350	Oprea1_806534	No result	Amino acid and Its metabolites	Amino acid derivatives	C8H15NO3	3	0.8433	99-15-0	195473	219276	201575	128960	128118	130247	1.2856
MW0103512	Cytidine	4395-95-3 65-46-3 67875-14-3	CHEBI:17562	HMDB0000089	C00475 D07769	No result	No result	Nucleotide and Its metabolites	Nucleotide and Its metabolites	C9H13N3O5	3	0.6049	65-46-3	199486	180787	167397	94763.6	112770	111284	1.25149
MW0158892	Val-Arg-Gln-Val-Asp	No result	No result	No result	No result	No result	No result	Amino acid and Its metabolites	Small Peptide	C25H45N9O9	3	0.7597	-	107735	76408.1	93807.6	12532.7	16268	20622.3	1.27381
MW0155181	Phe-Glu-Ile-Arg	No result	No result	No result	No result	No result	No result	Amino acid and Its metabolites	Small Peptide	C26H41N7O7	3	0.823	-	421495	423208	394289	464311	513475	489431	1.19154
MW0107001	Gln-Phe	No result	No result	HMDB0028804	No result	No result	No result	Amino acid and Its metabolites	Small Peptide	C14H19N3O4	3	0.6603	92327-75-8	144343	147084	135917	56393.9	65544.7	77236.9	1.26234
MW0143450	Aspartyl phosphate							Organic acid and Its derivatives	Organic acid and Its derivatives	C4H8NO7P	3	0.8151	22138-53-0	1281.53	1538.19	1159.63	73339.5	80171.8	78135	1.2988
MW0139229	Ozagrel	82571-53-7	No result	No result	D08327	BPBio1_001119 BSPBio_001017 Prestwick2_000979 Prestwick3_000979	No result	Heterocyclic compounds	Heterocyclic compounds	C13H12N2O2	3	0.7528	82571-53-7	132554	136763	132018	49945.9	58993.6	65132.3	1.27729
MW0141647	17-trifluoromethylphenyl trinor PGF2 ethyl amide	No result	No result	No result	No result	No result	No result	Hormones and hormone related compounds	Hormones and hormone related compounds	C26H36F3NO3	3	0.5543	-	97208.5	100421	80385.1	16855.6	18815.3	15203.5	1.29226
MW0151543	Ile-Phe-His							Amino acid and Its metabolites	Small Peptide	C21H29N5O4	3	0.7278	-	135733	91476.1	98670.2	24734.6	31068	43252.2	1.23149
MW0155848	Pro-Glu-Gln	No result	No result	No result	No result	No result	No result	Amino acid and Its metabolites	Small Peptide	C15H24N4O7	3	0.7574	-	107735	106841	94176.3	17235.3	33911.4	30850.6	1.23797
MW0012191	12,13-DiHOME	No result	CHEBI:72665	HMDB0004705	C14829	No result	No result	FA	Oxidized lipids	C18H34O4	2	0.931	263399-35-5	483446	450969	411073	352929	380943	385112	1.11674
MW0146194	Asp-Lys-Ser-Cys-Ala	No result	No result	No result	No result	No result	No result	Amino acid and Its metabolites	Small Peptide	C19H34N6O9S	3	0.7374	-	371145	355629	347755	437456	437452	425610	1.26873
MW0166807	4-Dodecanoylsucrose	No result	No result	No result	No result	No result	No result	Aldehyde,Ketones,Esters	Esters	C24H44O12	3	0.517	-	76648.7	100872	75972.6	6269.46	14615.1	7454.26	1.26203
MW0168389	[(2S,6S,10S,12R,13S,14S,15S,16S,17R,18R,19S,22S,23S,25R)-16,17-diacetyloxy-10,12,14,23-tetrahydroxy-6,10,19-trimethyl-13-[(2R)-2-methylbutanoyl]oxy-24-oxa-4-azaheptacyclo[12.12.0.02,11.04,9.015,25.018,23.019,25]hexacosan-22-yl] (2S,3R)-2,3-dihydroxy-2-methylbutanoate							Aldehyde,Ketones,Esters	Esters	C41H63NO15	3	0.7767	-	147190	152153	123027	53307.3	85428.8	58704.8	1.20274
MW0124152	(6E)-7-[3-(4-fluorophenyl)-1-(propan-2-yl)-1H-indol-2-yl]-3,5-dihydroxyhept-6-enoic acid							Heterocyclic compounds	Heterocyclic compounds	C24H26FNO4	3	0.5667	93957-54-1	341863	341757	304705	395282	425228	392667	1.18685
MW0168661	7-Chlorokynurenic acid							Organic acid and Its derivatives	Organic acid and Its derivatives	C10H6ClNO3	3	0.7884	-	3846.82	11881	15102	52841.4	42106.1	160225	1.13164
MW0134337	5-{[2,2-dimethyl-7-(2-methylbut-3-en-2-yl)-5-[(2-methylbut-3-en-2-yl)oxy]-8-oxo-2H,8H-pyrano[3,2-g]chromen-10-yl]oxy}-10-(1-hydroxy-2-methylbut-3-en-2-yl)-8,8-dimethyl-3-(2-methylbut-3-en-2-yl)-2H,8H-pyrano[3,2-g]chromen-2-one							Aldehyde,Ketones,Esters	Ketones	C48H54O9	3	0.6026	-	139819	121977	109090	43105.6	52170.9	51273.8	1.27356
MW0121486	5-Fluoro-N-(2-(4-(2-Oxo-2,3-dihydro-1H-benzo[d]imidazol-1-yl)piperidin-1-yl)ethyl)-1H-indole-2-carboxamide							Alcohol and amines	Amines	C23H24FN5O2	3	0.5668	939055-18-2	213800	180086	126407	107897	109605	78550	1.07378
FDATN00645	Valnemulin hydrochloride	133868-46-9	No result	No result	No result	No result	No result	Others	Medicine	C31H53ClN2O5S	3	0.6102	133868-46-9	78562	93589.9	76239.3	6105.11	11139.7	6976.95	1.28218
MW0166709	3'-Acetyl-3-lauryl-4-(isovaleryl)sucrose	No result	No result	No result	No result	No result	No result	Others	Others	C31H54O14	3	0.54	-	180482	172182	135690	79918.4	94127.9	90802.4	1.23272
MW0145401	Arg-Ile-Thr-Glu-Ala	No result	No result	No result	No result	No result	No result	Amino acid and Its metabolites	Small Peptide	C24H44N8O9	3	0.6828	-	179909	117502	129533	63000.4	73138.6	67938.3	1.21666
MW0141646	5-Heptenoic acid,7-[(1R,2R,3R,5S)-3,5-dihydroxy-2-[(1E,3S)-3-hydroxy-5-[3-(trifluoromethyl)phenyl]-1-penten-1-yl]cyclopentyl]-,(5Z)-							Hormones and hormone related compounds	Hormones and hormone related compounds	C24H31F3O5	3	0.8722	-	447254	452856	404132	341511	381800	358714	1.15297
MW0105761	Articaine hydrochloride							Others	Medicine	C13H21ClN2O3S	3	0.7227	23964-57-0 | 161448-79-9	107437	104846	97522.9	158225	186575	187182	1.26693
MW0148040	Cys-Lys-Ser							Amino acid and Its metabolites	Small Peptide	C12H24N4O5S1	3	0.7479	-	40867.2	54387.4	44876.3	115740	125335	121221	1.27916
MW0169027	Dehydrocholic acid	81-23-2 99726-76-8	CHEBI:31459	No result	C13154 D01693	BPBio1_000184 BSPBio_000166 PDSP2_000076 Prestwick3_000123	No result	Bile acids	Bile acids	C24H34O5	3	0.624	81-23-2	127340	107139	105331	41769.1	34116.4	42182.7	1.28139
MW0148180	Debromohymenialdisine	75593-17-8	No result	No result	C19897	SMP2_000294	No result	Heterocyclic compounds	Heterocyclic compounds	C11H11N5O2	3	0.7113	75593-17-8 | 125118-55-0	156195	137354	162651	103651	64059.7	66809.8	1.17776
MW0111208	Nevirapine	129618-40-2	CHEBI:63613	HMDB0014383	C07263 D00435	No result	No result	Heterocyclic compounds	Heterocyclic compounds	C15H14N4O	3	0.5938	129618-40-2	126134	107290	105287	40361.8	35518	41553	1.28757
MW0169343	Isradipine	131970-21-3 75695-93-1 84260-64-0 88977-22-4	No result	HMDB0014415	D00349	BPBio1_001323 BSPBio_001201 Prestwick2_001021 Prestwick3_001021	No result	Heterocyclic compounds	Heterocyclic compounds	C19H21N3O5	3	0.6675	75695-93-1 | 131970-21-3	198899	233644	173850	117374	133204	134582	1.19431
MW0127890	4'-Hydroxychalcone							Aldehyde,Ketones,Esters	Ketones	C15H12O2	3	0.7944	2657-25-2 | 38239-52-0	142470	152909	177869	197795	242742	253888	1.15156
MW0054299	L-canavanine							Amino acid and Its metabolites	Amino acid derivatives	C5H12N4O3	3	0.684	543-38-4	152860	152347	136739	219576	218574	224063	1.27812
MW0114363	Dronedarone	141626-36-0	CHEBI:50659	No result	D02537	No result	No result	Aldehyde,Ketones,Esters	Ketones	C31H44N2O5S	2	0.8024	141626-36-0	117575	106892	92605.1	30026.7	35626	31914.4	1.28623
MW0141318	12alpha-(Chloromethyl)-12-hydroxy-pregn-4-ene-3,20-dione	7255-84-7 7331-21-7	CHEBI:79448	No result	C14923	No result	No result	Aldehyde,Ketones,Esters	Ketones	C22H31ClO3	3	0.7786	7255-84-7	163541	156987	159272	81966.5	88061.1	91016.7	1.29194
MW0103656	5-Methyluridine	1463-10-1	CHEBI:30821 CHEBI:45996	HMDB0000884	No result	No result	No result	Nucleotide and Its metabolites	Nucleotide and Its metabolites	C10H14N2O6	2	0.8202	1463-10-1	88102.5	86134.7	61901.3	6160.63	8297.93	3661.41	1.27397
MW0118630	2-Hydroxy-imipramine glucuronide	54190-76-0	No result	HMDB0060717	No result	No result	No result	Heterocyclic compounds	Heterocyclic compounds	C25H32N2O7	3	0.603	-	292681	243174	271038	218325	190119	181222	1.16717
MW0159067	Val-Leu-Leu-Gly-Thr	No result	No result	No result	No result	No result	No result	Amino acid and Its metabolites	Small Peptide	C23H43N5O7	3	0.6441	-	49298.9	91633.1	113260	19182.6	4313.29	14083.3	1.15872
MW0110232	Tyr-Val-Lys		No result	No result				Amino acid and Its metabolites	Small Peptide	C20H32N4O5	3	0.6801	-	179098	171256	170979	233709	268335	235429	1.25439
MEDTN01088	Lyxo-2-Hexulose	17598-81-1 77156-82-2 87-81-0	CHEBI:47693	HMDB0003418	D09007	No result	No result	Carbohydrates and Its metabolites	Carbohydrates and Its metabolites	C6H12O6	3	0.7029	87-81-0 | 17598-81-1	325430	305271	261833	205354	237393	234631	1.12336
MW0145298	Arg-Asp-Leu-Tyr-Ser	No result	No result	No result	No result	No result	No result	Amino acid and Its metabolites	Small Peptide	C28H44N8O10	3	0.6626	-	122806	73654.3	121085	41328	16106.9	46022.8	1.10322
MEDL01891	3-Hydroxycinnamic acid							Organic acid and Its derivatives	Organic acid and Its derivatives	C9H8O3	3	0.7434	14755-02-3	129380	135298	112719	195823	198053	197473	1.26276
MW0147116	Carmamycin A	No result	No result	No result	No result	No result	No result	Others	Others	C25H45N3O6S	3	0.7719	-	408778	371579	309858	286196	287658	303390	1.02116
MW0158633	Tyr-Thr-Val-Thr-Leu	No result	No result	No result	No result	No result	No result	Amino acid and Its metabolites	Small Peptide	C28H45N5O9	3	0.6961	-	339072	325601	306549	363790	442915	377303	1.07271
MW0054903	Methyl nomilinate 17-glucoside							Aldehyde,Ketones,Esters	Esters	C35H50O16	3	0.7412	-	51737.3	112001	81687.6	11658.3	8559.92	13016.6	1.25785
MW0144593	Ala-His-Leu	No result	No result	No result	No result	No result	No result	Amino acid and Its metabolites	Small Peptide	C15H25N5O4	3	0.7354	-	286323	299954	330961	205254	271828	228088	1.06712
MW0104210	11-Dehydro-2,3-dinor-txb2	No result	No result	No result	No result	No result	No result	Organic acid and Its derivatives	Organic acid and Its derivatives	C18H28O6	3	0.7393	79250-60-5	83101.1	85872.2	76396	11918.6	6310.21	15167	1.25987
MW0130099	Leukoefdin							Benzene and substituted derivatives	Benzene and substituted derivatives	C15H14O8	3	0.771	491-52-1 | 12764-74-8	137861	124077	126868	213188	184123	202878	1.26072
MW0146007	Asp-Ala-Leu-Arg-Thr	No result	No result	No result	No result	No result	No result	Amino acid and Its metabolites	Small Peptide	C23H42N8O9	3	0.7793	-	170130	214201	148459	86597.1	108992	127423	1.10438
MW0158624	Tyr-Thr-Leu							Amino acid and Its metabolites	Small Peptide	C19H29N3O6	3	0.7389	-	84078	81464.6	70064.1	6128.13	11097.9	9481.4	1.28102
MW0114050	Cediranib	288383-20-0	No result	No result	D08881	No result	No result	Heterocyclic compounds	Heterocyclic compounds	C25H27FN4O3	3	0.7108	-	336351	284843	271497	353432	355241	392498	1.07021
MW0168012	5-Methyltetrahydrofolate							Organic acid and Its derivatives	Organic acid and Its derivatives	C20H25N7O6	3	0.6396	-	164177	117759	101294	168304	219139	204239	1.05249
MW0146147	Asp-Ile-His-Arg	No result	No result	No result	No result	No result	No result	Amino acid and Its metabolites	Small Peptide	C22H37N9O7	3	0.7325	-	119452	113033	81331.1	59940.8	22548.2	22891.5	1.12722
MW0123178	Butabarbital							Heterocyclic compounds	Heterocyclic compounds	C10H16N2O3	3	0.6804	125-40-6	55979.7	62712.6	47222.7	112936	118219	142640	1.25571
MW0152085	L-Alanyl-gamma-D-glutamyl-L-lysine	No result	No result	No result	No result	No result	No result	Amino acid and Its metabolites	Small Peptide	C14H26N4O6	3	0.6394	-	152741	141115	116089	62767.5	73632.1	65759	1.25531
MW0108138	Merodesmosine	No result	No result	HMDB0030407	No result	No result	No result	Amino acid and Its metabolites	Amino acid derivatives	C18H34N4O6	3	0.6376	17096-97-8	202681	201624	177214	251259	275776	262073	1.23255
MEDL01836	Capsianoside IV	No result	No result	HMDB0030736	No result	No result	No result	Terpenoids	Ditepenoids	C32H52O13	2	0.853	121924-05-8	107299	93245	87528.7	22097.9	27210.4	31190.8	1.27839
MW0052355	Digoxin	20830-75-5	CHEBI:4551	No result	C06956 D00298	BPBio1_000500 BSPBio_000454 Prestwick2_000437 Prestwick3_000437	SR-01000721866-3	Steroids	Steroid	C41H64O14	3	0.5963	20830-75-5	112269	100150	71317.1	33765.8	20914.7	21987.5	1.24295
MW0108930	Nummularine A	No result	No result	HMDB0029336	No result	No result	No result	Heterocyclic compounds	Heterocyclic compounds	C36H49N5O6	3	0.6893	53947-95-8	76874.6	82570.6	70486.5	8463.53	4573.07	9877.63	1.27449
MW0157709	Thr-Leu-Pro-Pro-Gly	No result	No result	No result	No result	No result	No result	Amino acid and Its metabolites	Small Peptide	C22H37N5O7	3	0.6035	-	89669.7	63308.6	64070.3	5319.6	1573.97	3663.96	1.26472
MW0168238	Adrenorphin	88377-68-8 88377-68-8 94248-04-1	No result	HMDB0059791	C16108	No result	No result	Amino acid and Its metabolites	Amino acid derivatives	C44H69N15O9S	3	0.6277	-	56585.1	104993	85995.6	17025.1	10805.3	13535.1	1.26075
MW0049035	Cortexolone	152-58-9	No result	No result	C05488 D03595	Lopac0_001040	No result	Hormones and hormone related compounds	Hormones and hormone related compounds	C21H30O4	3	0.5866	152-58-9	469403	441896	441223	370572	399775	376057	1.21695
MW0147204	Carnosifloside III	109985-92-4	CHEBI:3426	No result	C08791	No result	No result	Steroids	Steroid	C48H78O18	3	0.6307	109985-92-4	98924.3	87338.9	50038.4	7444.46	10809.9	12452.4	1.2588
MW0155410	Phe-Val-Ile-Glu							Amino acid and Its metabolites	Small Peptide	C25H38N4O7	3	0.5665	-	183257	136949	128532	207883	213805	232520	1.1197
MW0009639	Repaglinide aromatic amine	637301-29-2	No result	HMDB0061005	No result	No result	No result	Benzene and substituted derivatives	Benzene and substituted derivatives	C22H28N2O4	3	0.6205	-	123119	109519	100572	39672.7	46270.1	41956.9	1.28447
MW0126429	Resazurin	550-82-3	CHEBI:8806	No result	C11178	No result	No result	Heterocyclic compounds	Heterocyclic compounds	C12H7NO4	3	0.7145	550-82-3 | 153796-08-8	87496.7	58832.2	67311.5	5110.82	966.61	3236.72	1.24421
MW0009167	Norverapamil	67018-85-3 68400-18-0	No result	HMDB0060540	No result	No result	No result	Benzene and substituted derivatives	Benzene and substituted derivatives	C26H36N2O4	3	0.6393	-	138526	79335.8	109008	30744.1	38080.2	53956.3	1.17618
MW0062154	Prednisone	2899-94-7 53-03-2	CHEBI:8382	HMDB0014773	C07370	ACon0_000082 ACon1_000297 BPBio1_000323 BSPBio_000293 MEGxm0_000443 Prestwick2_000077 Prestwick3_000077	No result	Hormones and hormone related compounds	Hormones and hormone related compounds	C21H26O5	3	0.6731	-	92935.2	93801	77427.4	31297.7	18161.3	10733.3	1.20763
MW0126895	(±)-Tryptophan							Amino acid and Its metabolites	Amino acids	C11H12N2O2	3	0.8466	-	78925	81740.9	74572.1	143312	145569	149692	1.29413
MW0151663	Ile-Ala	24787-73-3	CHEBI:74062	No result	No result	No result	No result	Amino acid and Its metabolites	Small Peptide	C9H18N2O3	2	0.9198	24787-73-3	95882.2	155620	95768.1	31766.1	58338.2	53998.4	1.13008
MW0107957	L-Theanine	3081-61-6	CHEBI:17394 CHEBI:58128	HMDB0034365	C01047	BSPBio_002633 Spectrum5_000897	No result	Amino acid and Its metabolites	Amino acids	C7H14N2O3	3	0.7995	3081-61-6	203500	183261	159063	114948	111758	116402	1.24049
MW0009604	Pyracarbolid	24691-76-7	CHEBI:82057	No result	C18914	No result	No result	Benzene and substituted derivatives	Benzene and substituted derivatives	C13H15NO2	3	0.6984	24691-76-7	140184	136511	122166	66493.9	63453.9	66957.8	1.28966
MW0013116	(Z)-5-[(1R,2R,3S,5S)-3,5-dihydroxy-2-[(E,3S)-3-hydroxyoct-1-enyl]cyclopentyl]pent-3-enoic acid							Hormones and hormone related compounds	Hormones and hormone related compounds	C18H30O5	3	0.7849	240405-20-3	211445	216037	184830	129164	142182	139191	1.24966
MW0156890	Ser-Pro-Glu-Gly-Thr	No result	No result	No result	No result			Amino acid and Its metabolites	Small Peptide	C19H31N5O10	3	0.5944	-	196261	172540	154808	271311	214035	240022	1.11487
MW0108371	N-(1-Deoxy-1-fructosyl)phenylalanine	No result	No result	HMDB0037846	No result	No result	No result	Amino acid and Its metabolites	Amino acid derivatives	C15H21NO7	3	0.6743	87251-83-0	238015	254009	200685	147631	179186	164174	1.15013
MEDN0075	N-Acetyl-L-phenylalanine	2018-61-3 2901-75-9 36159-69-0	CHEBI:16259	HMDB0000512	C03519	No result	SR-01000636121-1	Amino acid and Its metabolites	Amino acid derivatives	C11H13NO3	2	0.9262	2018-61-3	273775	251581	230459	173666	189696	191310	1.21466
MW0000347	Naltrindole	111555-53-4	CHEBI:81528	No result	C18128	No result	No result	Heterocyclic compounds	Indole and Its derivatives	C26H26N2O3	2	0.9015	111555-53-4	106611	106106	88370.1	19684.1	44623.4	35771.3	1.18923
MW0158598	Tyr-Ser-Asn-Arg	No result	No result	No result	No result	No result	No result	Amino acid and Its metabolites	Small Peptide	C22H34N8O8	3	0.7199	-	349625	345448	309839	381468	406984	417011	1.15786
MW0155973	Pro-Pro-Asp-Gln-Gln	No result	No result	No result	No result	No result	No result	Amino acid and Its metabolites	Small Peptide	C24H37N7O10	3	0.7561	-	534337	541131	546494	629396	594989	597956	1.23357
MW0142886	3-Dehydro-2-deoxyecdysone	No result	No result	No result	C16497	No result	No result	Aldehyde,Ketones,Esters	Ketones	C27H42O5	3	0.6334	-	257707	261227	222213	304336	310303	326828	1.17896
MW0142917	3-Ethoxyandrosta-3,5-dien-17beta-ol propanoate							Aldehyde,Ketones,Esters	Esters	C24H36O3	3	0.6153	52091-99-3	81502.9	80845	78217.8	151979	144658	143974	1.29636
FDATN01214	Cariprazine hydrochloride	No result	No result	No result	No result	No result	No result	Others	Medicine	C21H33Cl3N4O	3	0.7476	-	225653	245498	216718	153191	164664	169988	1.25146
MW0145340	Arg-Glu-Arg-Val-Tyr	No result	No result	No result	No result	No result	No result	Amino acid and Its metabolites	Small Peptide	C31H51N11O9	3	0.7929	-	80746.5	93502.2	87585.5	26218.1	9541.4	26558.3	1.18883
MW0148275	Deoxybrevianamide E	34610-68-9	CHEBI:72948	No result	C20636	No result	No result	Amino acid and Its metabolites	Small Peptide	C21H25N3O2	3	0.7225	34610-68-9	90667.2	83732	94118.8	27230.4	22167.7	19965	1.28733
MW0007002	Ethalfluralin							Benzene and substituted derivatives	Benzene and substituted derivatives	C13H14F3N3O4	3	0.6455	-	8818.22	21492.2	12071	28677.9	114009	97547.6	1.10832
MW0152427	Leu-Met-Ala-His-Leu	No result	No result	No result	No result	No result	No result	Amino acid and Its metabolites	Small Peptide	C26H45N7O6S	3	0.7532	-	120066	96382.9	104957	32348.2	30886.5	60319.6	1.18537
MW0159069	Val-Leu-Leu-Val-Val	No result	No result	No result	No result	No result	No result	Amino acid and Its metabolites	Small Peptide	C27H51N5O6	3	0.6764	-	99205.8	86884	90662.4	21325.3	29418	28512.2	1.27992
MW0014677	5-Acetamidovalerate							Organic acid and Its derivatives	Organic acid and Its derivatives	C7H13NO3	2	0.9306	-	99224.3	106242	107604	169746	171815	168747	1.29304
MW0123212	Carazolol	51997-43-4 53222-92-7 57775-29-8	No result	No result	D07608	No result	No result	Others	Medicine	C18H22N2O2	3	0.5989	-	163468	139427	163169	84405.5	91979.1	92658.6	1.26865
MEDN1331	4-Methoxyphenylacetic acid	104-01-8	CHEBI:55501	HMDB0002072	No result	No result	No result	Organic acid and Its derivatives	Organic acid and Its derivatives	C9H10O3	1b	0.7438	104-01-8	140804	130279	126384	66333.8	65511.4	68602.8	1.29336
MW0143604	5-Deoxyleucopelargonidin	38412-82-7	No result	No result	No result	No result	No result	Flavonoids	Anthocyanidins	C15H14O5	3	0.5513	-	97240.6	90476.2	70660.3	21310.8	13424.9	27158.7	1.24168
MW0109206	Phe-his	33367-37-2	CHEBI:73634	No result	No result	No result	No result	Amino acid and Its metabolites	Small Peptide	C15H18N4O3	3	0.8684	33367-37-2	105985	73904.1	89403.6	29114.1	24136	19578.5	1.26577
MEDP0081	Serotonin	50-67-9	CHEBI:28790	HMDB0000259	C00780	BCBcMAP01_000198 BPBio1_000377 BPBio1_001079 BSPBio_000341 BSPBio_001112 Bio1_000450 Bio1_000939 Bio1_001428 Bio2_000396 Bio2_000876 Biomol-NT_000083 IDI1_002151 Lopac0_000607 Oprea1_712368 PDSP1_001512 PDSP2_001496 Prestwick2_000481 Prestwick3_000481 SMP1_000272 cMAP_000059	No result	Tryptamines,Cholines,Pigments	Tryptamines	C10H12N2O	3	0.7876	50-67-9	259386	272131	272767	335883	328455	336380	1.28245
MW0146129	Asp-His-Phe							Amino acid and Its metabolites	Small Peptide	C19H23N5O6	3	0.7406	-	71549.8	100262	68906.9	8889.59	11759.9	24619.8	1.21743
MW0149933	Glu-Asn-Lys-Asp	No result	No result	No result	No result	No result	No result	Amino acid and Its metabolites	Small Peptide	C19H32N6O10	2	0.9107	-	556368	537540	514773	464881	505915	442601	1.06898
MW0114263	Digalacturonate	5894-59-7	No result	HMDB0039721	C02273	No result	No result	Organic acid and Its derivatives	Organic acid and Its derivatives	C12H18O13	3	0.6791	5894-59-7	93334.4	124774	33251.6	15798.4	13943.1	26453.1	1.09634
MW0106999	L-Glutaminyl-L-lysine	No result	No result	HMDB0028802	No result	No result	No result	Amino acid and Its metabolites	Small Peptide	C11H22N4O4	3	0.7898	45234-03-5	57416.7	94442.2	64206.4	1174.11	9092.44	10653.6	1.14025
MEDL00377	Glu-Phe	No result	No result	HMDB0029156	No result	No result	No result	Amino acid and Its metabolites	Small Peptide	C14H18N2O5	2	0.8453	20556-22-3	228297	229595	211318	293954	283319	286748	1.26735
MW0153348	Malyngamide C acetate	No result	No result	No result	No result	No result	No result	Aldehyde,Ketones,Esters	Ketones	C26H40ClNO6	2	0.9194	-	82283.6	81104.8	69890.5	20066.6	12790.8	5984.59	1.21844
MEDL00375	Oglufanide	122933-59-9 38101-59-6	CHEBI:73512	HMDB0028830	No result	No result	No result	Amino acid and Its metabolites	Small Peptide	C16H19N3O5	3	0.7404	38101-59-6	208082	205223	204796	142408	147169	134908	1.28779
MW0140101	(+)-cis-Isopulegone	No result	No result	No result	No result	No result	No result	Aldehyde,Ketones,Esters	Ketones	C10H16O	3	0.7301	52152-10-0	73397.8	67734.4	67709.5	1087.7	7893.27	6274.68	1.1922
MW0125974	Olomoucine	101622-51-9 10214-40-1 614-47-1	No result	HMDB0035233	No result	BCBcMAP01_000205 BSPBio_000990 Bio1_000336 Bio1_000825 Bio1_001314 Bio2_000335 Bio2_000815 BiomolKI2_000052 BiomolKI_000046 CBiol_002050 IDI1_002090 Lopac0_000883 SMP1_000281	No result	Heterocyclic compounds	Heterocyclic compounds	C15H18N6O	3	0.714	101622-51-9	327286	331851	317159	263789	232410	286608	1.13719
MW0109211	Phenylalanylphenylalanine							Amino acid and Its metabolites	Small Peptide	C18H20N2O3	2	0.8357	201023-39-4	148705	141086	128521	185735	206793	219168	1.23124
MW0150366	Gly-Gly-Gln							Amino acid and Its metabolites	Small Peptide	C9H16N4O5	3	0.7441	186787-32-6	41003.4	44821.5	47302.2	130238	130174	65982.7	1.14294
MW0157590	Thr-Asp-Lys-Arg	No result	No result	No result	No result	No result	No result	Amino acid and Its metabolites	Small Peptide	C20H38N8O8	3	0.8309	-	93174.9	83517.9	90240.9	36493.2	11841.6	25484	1.17327
MW0153223	L-Histidine,L-lysyl-	No result	No result	No result	No result	No result	No result	Amino acid and Its metabolites	Small Peptide	C12H21N5O3	2	0.8776	-	146045	128978	114484	61011.6	66291.7	69236.9	1.26579
MW0124421	Indole-4-carboxaldehyde	No result	No result	No result	No result	No result	No result	Heterocyclic compounds	Indole and Its derivatives	C9H7NO	2	0.9553	1074-86-8	222629	214519	203833	270161	290691	273029	1.2583
MW0149524	Gentamicin A2	55715-66-7	CHEBI:81279	No result	C17701	No result	No result	Others	Medicine	C17H33N3O11	3	0.6129	55715-66-7	78753.5	116114	58305.3	12574.6	25138.1	22855.9	1.20123
MW0150961	His-His-Ser-Lys-His	No result	No result	No result	No result	No result	No result	Amino acid and Its metabolites	Small Peptide	C27H40N12O7	3	0.8059	-	80097.6	92205	121565	42805.6	29005.8	29757.7	1.23516
MW0150476	Gly-Pro-Val-Asp-His							Amino acid and Its metabolites	Small Peptide	C22H33N7O8	2	0.9252	-	26181.8	16004.9	13034	88799.7	70224.2	88457.5	1.24857
[truncated: 1,603 more rows]

## Sheet: Supplementary Table 5
Supplementary Table 5. Metabolites in the pre-culture and post-culture media of OTU209.
[truncated: 1,898 more rows]

[truncated: 13 more sheets: Supplementary Table 6, Supplementary Table 7, Supplementary Table 8, Supplementary Table 9, Supplementary Table 10, Supplementary Table 11, Supplementary Table 12, Supplementary Table 13, Supplementary Table 14, Supplementary Table 15, Supplementary Table 16, Supplementary Table 17, Supplementary Table 18]
